# Supplementary material for: The COVID-19 vaccination campaign in Switzerland and its impact on disease spread
Source: bioRxiv or medRxiv preprint supplement (doi:10.1101/2023.04.06.23288251), 2023-04-12
Supplement: Supplementary file [file media-1.pdf]

**The COVID-19 vaccination campaign in Switzerland and its impact on disease spread**

**MODEL – age only  $Y_{at}$ , transmission weights  $\mathbf{w} = (w_{a,a',t})$**

M. Bekker-Nielsen Dunbar and L. Held

Epidemiology, Biostatistics and Prevention Institute, University of Zurich

E-mail: [maria.dunbar@uzh.ch](mailto:maria.dunbar@uzh.ch)

- 1 This document contains additional models to those outlined in the study protocol [1].  
 2 Knowledge of the analyses from the main manuscript is assumed. The models introduced  
 3 here have only age group effects. This means we are comparing the models:

$$\log(\nu_{at}) = \alpha_a^{(\nu)} + \gamma^{(\nu)\top} \mathbf{z}_{at}^{(\nu)} \quad (\text{neither})$$

$$\log(\phi_{at}) = \alpha_a^{(\phi)} + \gamma^{(\phi)\top} \mathbf{z}_{at}^{(\phi)}$$

$$\log(\nu_{at}) = \alpha_a^{(\nu)} + \beta_a^{(\nu)} \log(1 - x_{at}) + \gamma^{(\nu)\top} \mathbf{z}_{at}^{(\nu)} \quad (\text{endemic})$$

$$\log(\phi_{at}) = \alpha_a^{(\phi)} + \gamma^{(\phi)\top} \mathbf{z}_{at}^{(\phi)}$$

$$\log(\nu_{at}) = \alpha_a^{(\nu)} + \gamma^{(\nu)\top} \mathbf{z}_{at}^{(\nu)} \quad (\text{epidemic})$$

$$\log(\phi_{at}) = \alpha_a^{(\phi)} + \beta_a^{(\phi)} \log(1 - x_{at}) + \gamma^{(\phi)\top} \mathbf{z}_{at}^{(\phi)}$$

$$\log(\nu_{at}) = \alpha_a^{(\nu)} + \beta_a^{(\nu)} \log(1 - x_{at}) + \gamma^{(\nu)\top} \mathbf{z}_{at}^{(\nu)} \quad (\text{both})$$

$$\log(\phi_{at}) = \alpha_a^{(\phi)} + \beta_a^{(\phi)} \log(1 - x_{at}) + \gamma^{(\phi)\top} \mathbf{z}_{at}^{(\phi)}$$

- 4  $\mathbf{z}_{rt}$  is as given in the main manuscript.

## 5 1 Setup

6 The study period is 1st January 2021 to 30th November 2021 given by ISO weeks  
7 2020-53 to 2021-48, both weeks included. This is a deviation from the protocol. The new  
8 study period is chosen on the basis of the epidemic calendar. This is similar to influenza  
9 research in the northern hemisphere; we want our years to start and end such that the en-  
10 tire expected wave is captured in a single year. Furthermore, the latter cut-off was chosen  
11 due to the presence of Omicron variant COVID-19 in the original study period. The rea-  
12 son for this is that the vaccines considered in this work were not created with this variant  
13 in mind and may provide less protection against this disease. The study period covers 49  
14 observations. An additional deviation from the study protocol is that we do not include the  
15 youngest age group, as they do not receive any vaccines in the study period considered.

### 16 1.1 Outcome

17 The outcome variable is cases. Here we consider all cases (i.e. not limited to hospitali-  
18 sations). The cases are not equally distributed across age groups:

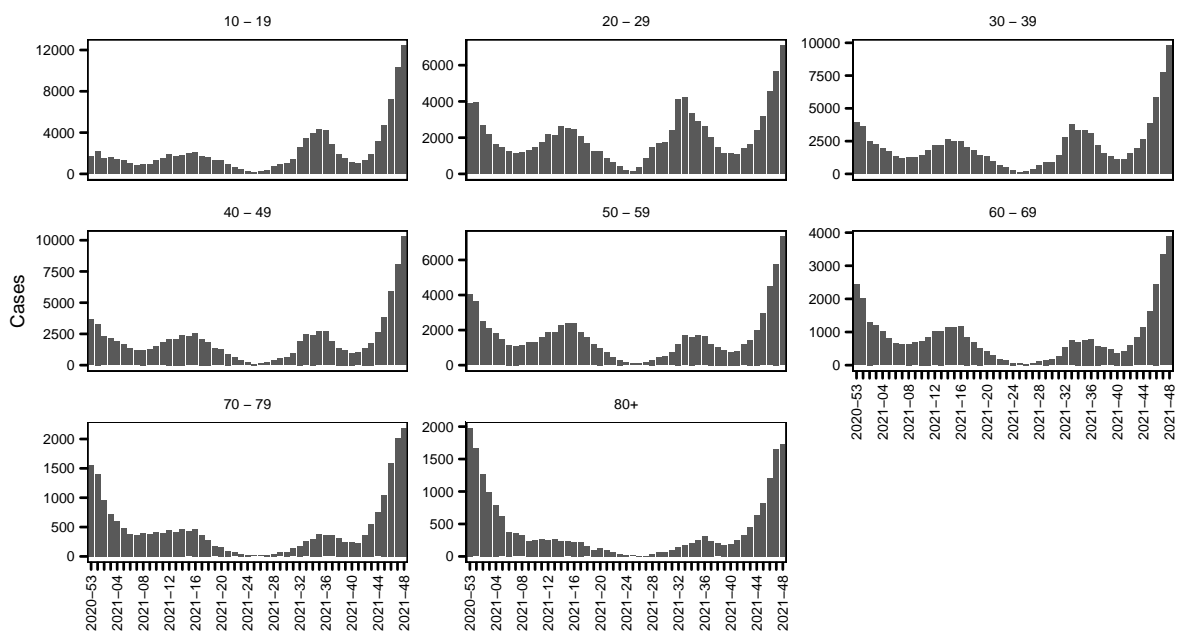

19

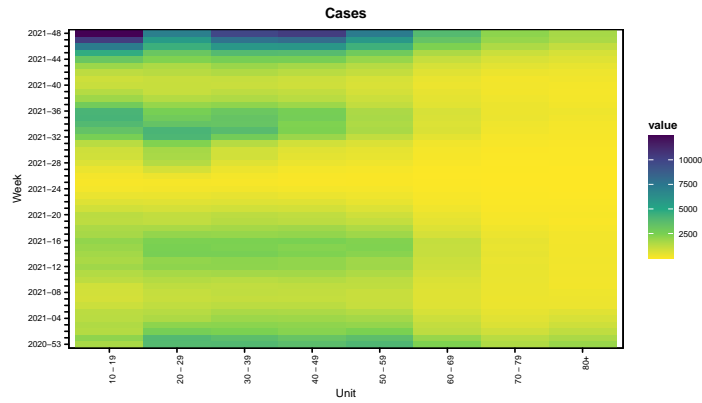

20

## 21 1.2 Covariates

22 The vaccination coverage looks as follows (the patterns are not so surprising consider-  
 23 ing Switzerland followed an age-based distribution scheme).

**Coverage (second dose and booster with waning taken into account)**

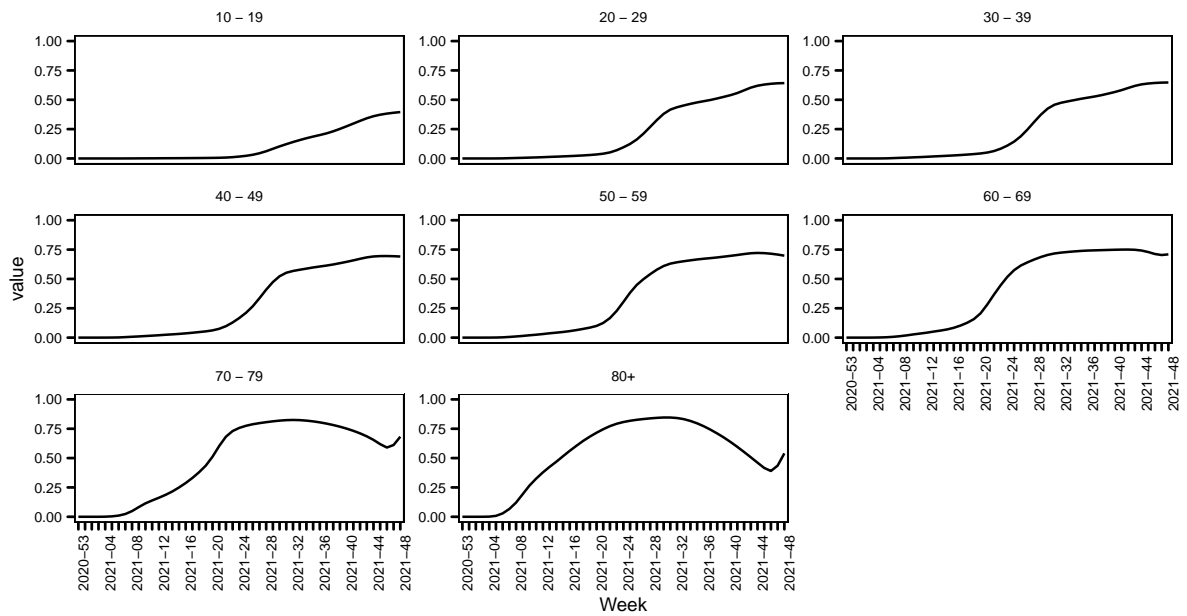

24

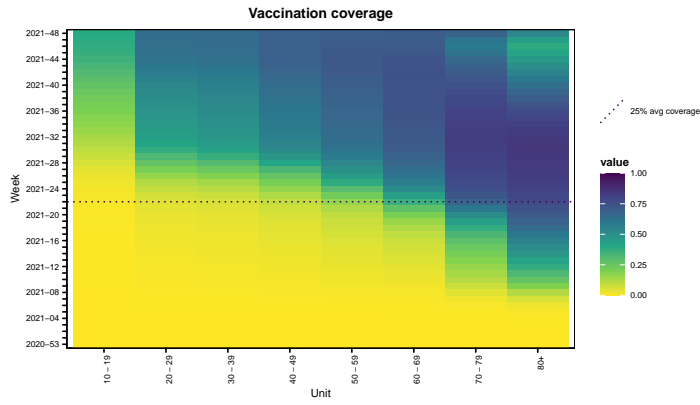

25

26 Transformed by  $f(x) = \log(1 - x)$  this looks like

**log(1 - vaccination coverage)**

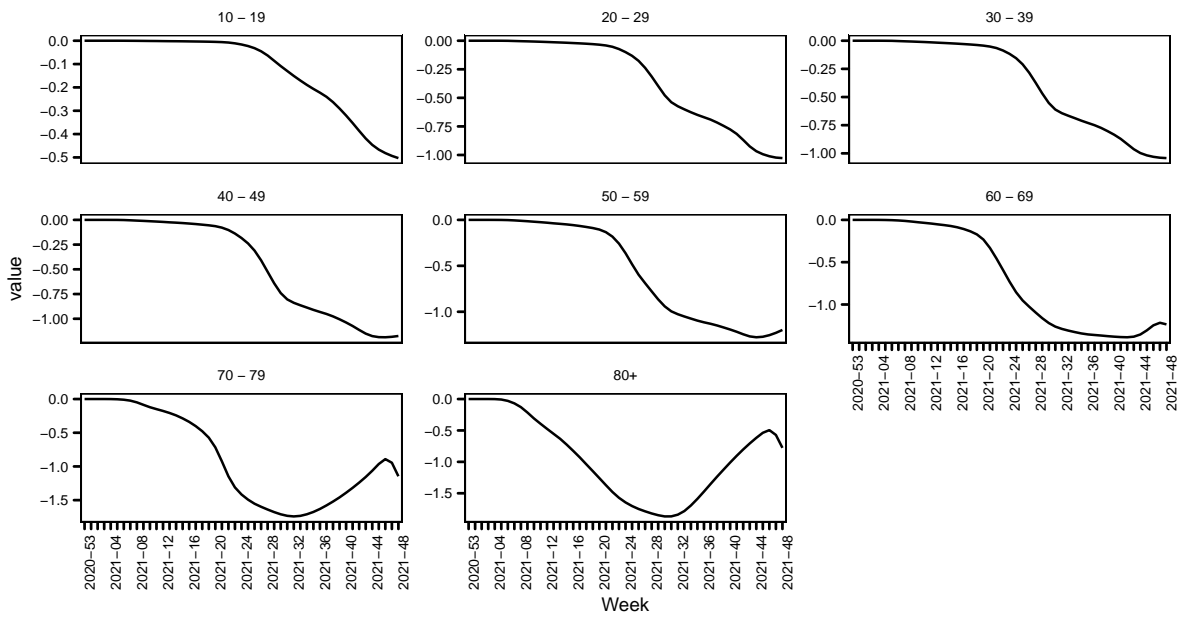

27

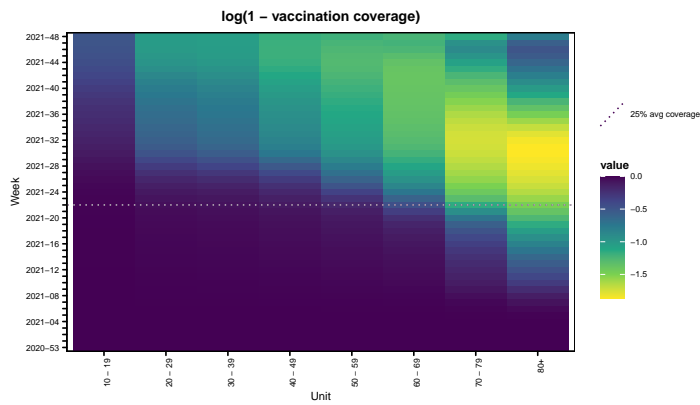

28

29 **2 Results overview**

30 The following table provides the estimated effects of vaccination coverage for models  
 31 with and without time-varying transmission weights.

| Weights     | Model    | Endemic          | Epidemic         | $\ell$    | DSS    |
|-------------|----------|------------------|------------------|-----------|--------|
| Constant    | Neither  |                  |                  | -2639.142 | 18.572 |
| Constant    | Endemic  | 2.042 (SE 0.246) |                  | -2598.267 | 20.585 |
| Constant    | Epidemic |                  | 0.722 (SE 0.062) | -2618.674 | 16.085 |
| 32 Constant | Both     | 2.118 (SE 0.14)  | 0.422 (SE 0.055) | -2529.263 | 18.605 |
| Varying     | Neither  |                  |                  | -2703.612 | 21.222 |
| Varying     | Endemic  | 2.234 (SE 0.121) |                  | -2569.63  | 18.454 |
| Varying     | Epidemic |                  | 0.578 (SE 0.07)  | -2670.896 | 23.896 |
| Varying     | Both     | 2.033 (SE 0.116) | 0.238 (SE 0.059) | -2561.504 | 19.611 |

33 **2.1 Time-constant age group transmission weights**

34 First we present the results of the modelling with the time-constant transmission weights.  
 35 Due to diverging effects when including fixed effects of age in the endemic component, we  
 36 remove those effects.

|                                   | neither           | endemic           | epidemic           | both              |
|-----------------------------------|-------------------|-------------------|--------------------|-------------------|
| $\alpha_{10-19}^{\phi}$           | -0.35 (SE 0.253)  | -1.536 (SE 0.251) | 0.146 (SE 0.041)   | -0.082 (SE 0.038) |
| $\alpha_{20-29}^{\phi}$           | -0.128 (SE 0.253) | -1.305 (SE 0.25)  | 0.496 (SE 0.045)   | 0.162 (SE 0.043)  |
| $\alpha_{30-39}^{\phi}$           | -0.283 (SE 0.255) | -1.47 (SE 0.251)  | 0.414 (SE 0.046)   | 0.149 (SE 0.042)  |
| $\alpha_{40-49}^{\phi}$           | -0.648 (SE 0.26)  | -1.854 (SE 0.252) | 0.19 (SE 0.049)    | -0.044 (SE 0.043) |
| $\alpha_{50-59}^{\phi}$           | -0.679 (SE 0.265) | -1.892 (SE 0.253) | 0.283 (SE 0.053)   | 0.041 (SE 0.045)  |
| $\alpha_{60-69}^{\phi}$           | -0.97 (SE 0.265)  | -2.154 (SE 0.25)  | 0.101 (SE 0.057)   | -0.148 (SE 0.049) |
| $\alpha_{70-79}^{\phi}$           | -0.812 (SE 0.258) | -1.938 (SE 0.247) | 0.326 (SE 0.063)   | 0.078 (SE 0.053)  |
| $\alpha_{80+}^{\phi}$             | -0.418 (SE 0.255) | -1.49 (SE 0.246)  | 0.757 (SE 0.066)   | 0.514 (SE 0.055)  |
| $\gamma_{\text{time}}^{\phi}$     | 0.058 (SE 0.023)  | 0.158 (SE 0.021)  | 0.027 (SE 0.003)   | 0.029 (SE 0.002)  |
| $\gamma_{\sin(2\pi t/52)}^{\phi}$ | 0.265 (SE 0.135)  | 0.659 (SE 0.109)  | -0.016 (SE 0.044)  | 0.256 (SE 0.042)  |
| $\gamma_{\cos(2\pi t/52)}^{\phi}$ | -0.315 (SE 0.22)  | -1.28 (SE 0.201)  | 0.178 (SE 0.026)   | 0.398 (SE 0.027)  |
| $\alpha_{10-19}^{\nu}$            | -7.352 (SE 2.288) | -3.214 (SE 0.837) |                    |                   |
| $\alpha_{20-29}^{\nu}$            | -7.294 (SE 2.29)  | -3.162 (SE 0.836) |                    |                   |
| $\alpha_{30-39}^{\nu}$            | -7.373 (SE 2.249) | -3.306 (SE 0.835) |                    |                   |
| $\alpha_{40-49}^{\nu}$            | -7.256 (SE 2.212) | -3.255 (SE 0.833) |                    |                   |
| $\alpha_{50-59}^{\nu}$            | -7.311 (SE 2.181) | -3.372 (SE 0.831) |                    |                   |
| $\alpha_{60-69}^{\nu}$            | -7.627 (SE 2.162) | -3.71 (SE 0.83)   |                    |                   |
| $\alpha_{70-79}^{\nu}$            | -7.975 (SE 2.148) | -3.893 (SE 0.83)  |                    |                   |
| $\alpha_{80+}^{\nu}$              | -7.611 (SE 2.137) | -3.296 (SE 0.832) |                    |                   |
| $\gamma_{\text{time}}^{\nu}$      | -1.117 (SE 0.129) | -0.93 (SE 0.057)  | -0.623 (SE 0.059)  | -0.059 (SE 0.118) |
| $\gamma_{\sin(2\pi t/52)}^{\nu}$  | 3.878 (SE 0.66)   | 2.57 (SE 0.24)    | -12.054 (SE 0.773) | -8.338 (SE 1.267) |
| $\gamma_{\cos(2\pi t/52)}^{\nu}$  | -8.768 (SE 0.959) | -8.242 (SE 0.5)   | -5.444 (SE 0.308)  | -7.03 (SE 0.204)  |
| $\psi$                            | 0.079 (SE 0.006)  | 0.063 (SE 0.005)  | 0.071 (SE 0.005)   | 0.044 (SE 0.003)  |
| $\beta^{(\nu)}$                   |                   | 2.042 (SE 0.246)  |                    | 2.118 (SE 0.14)   |
| $\beta^{(\phi)}$                  |                   |                   | 0.722 (SE 0.062)   | 0.422 (SE 0.055)  |

37

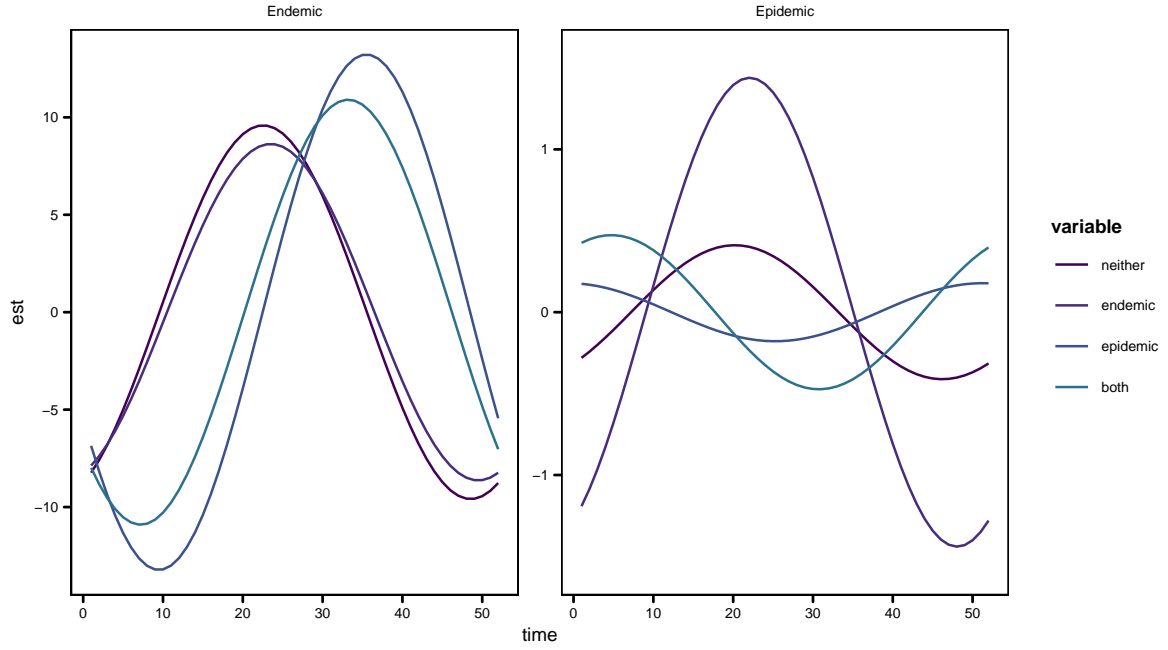

38

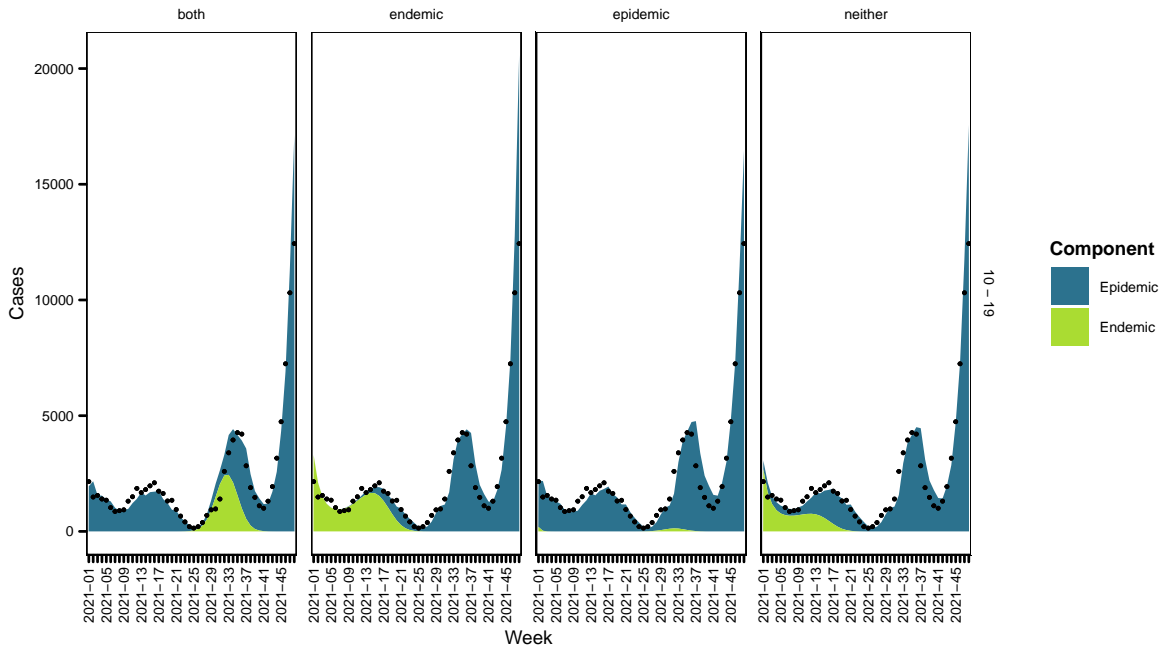

39

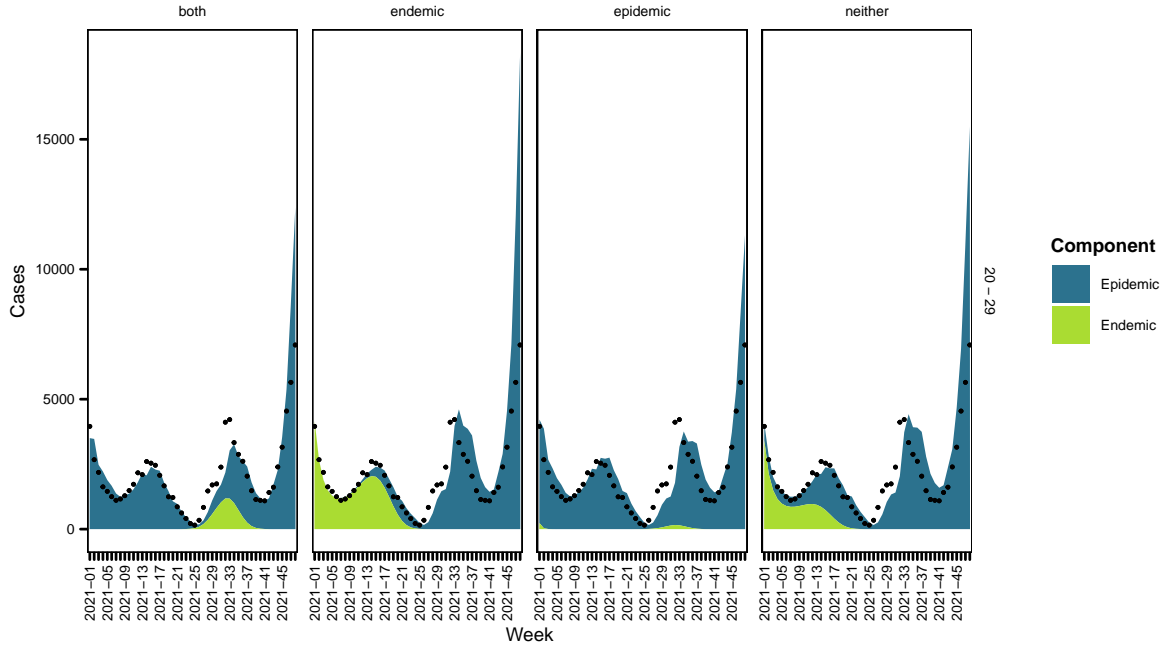

40

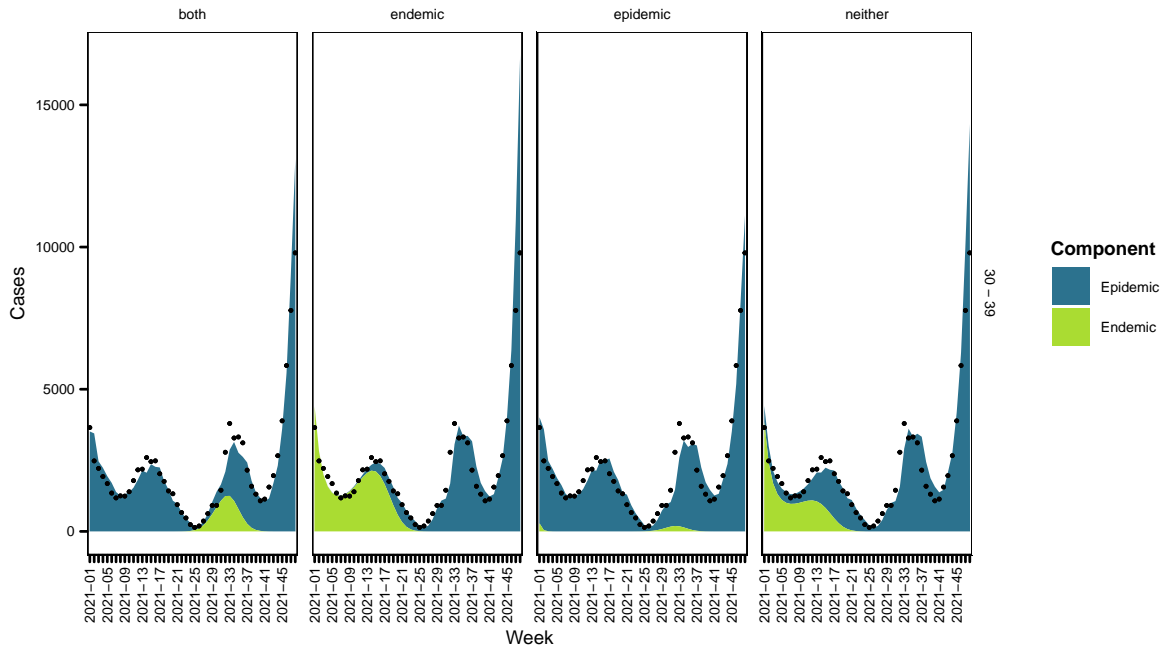

41



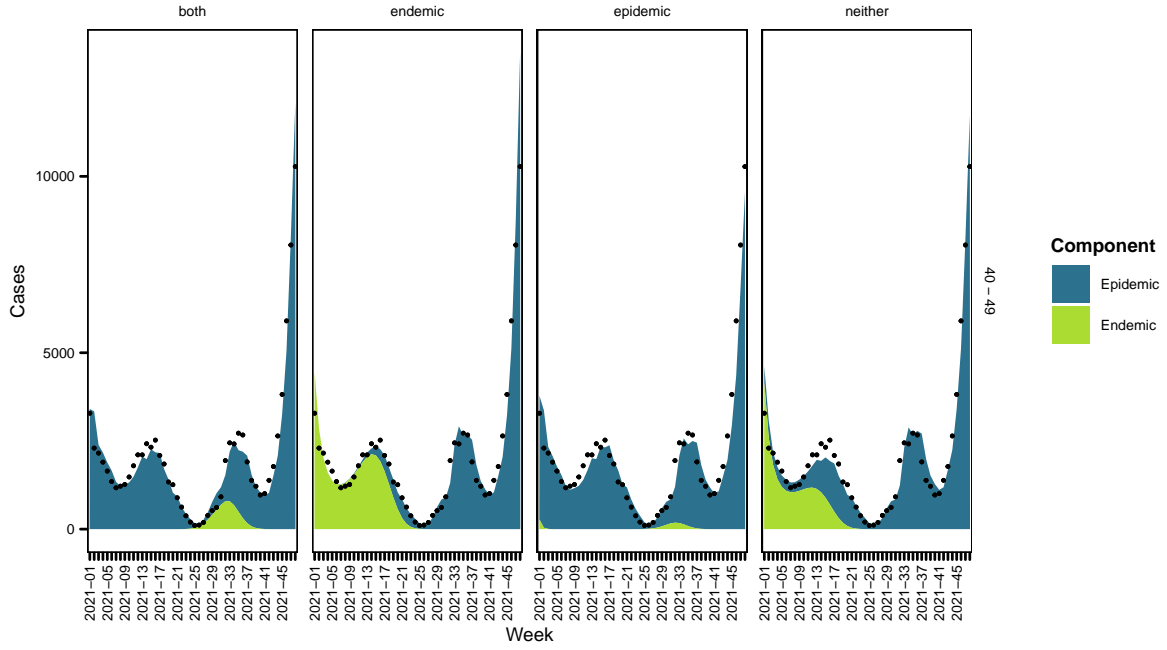

42

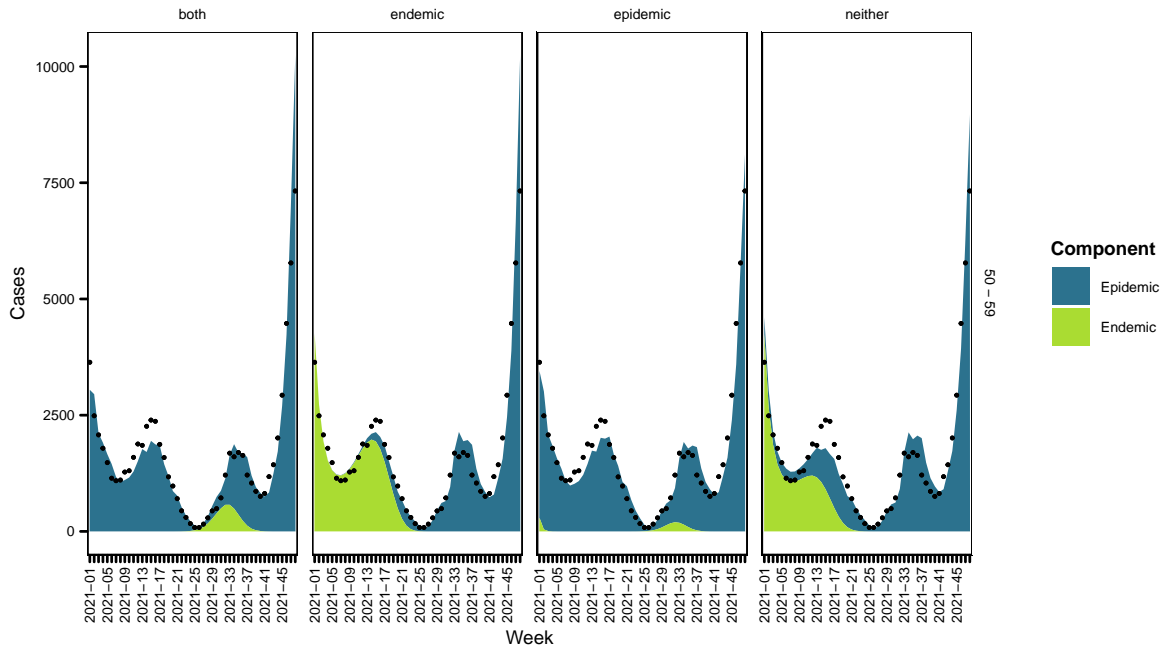

43

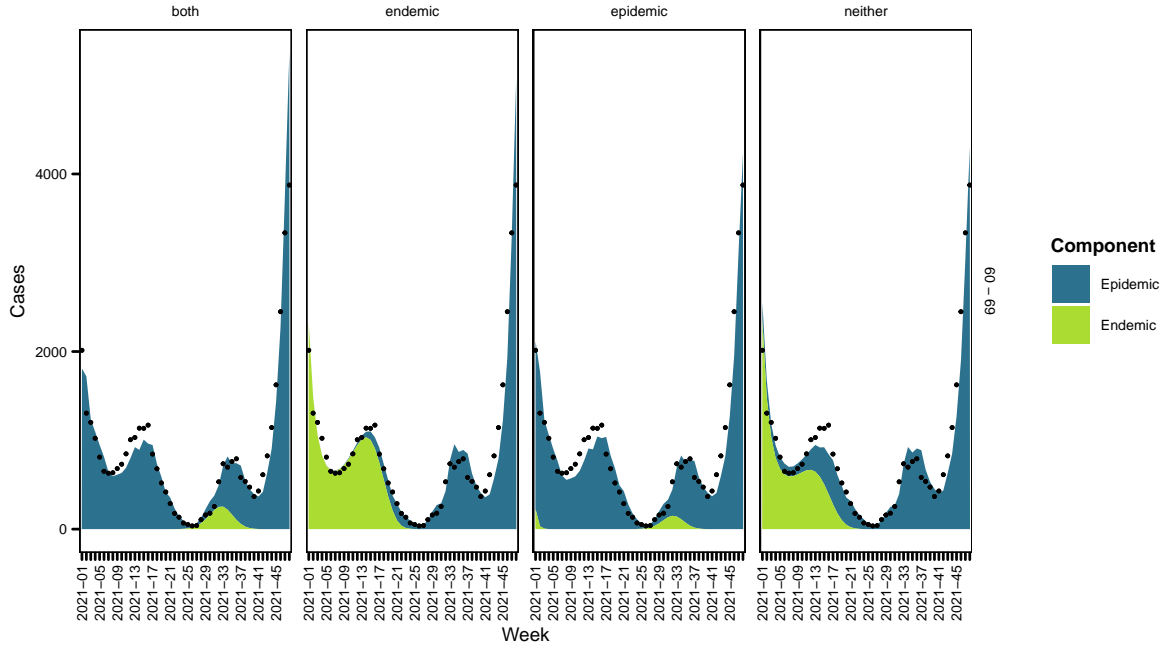

44

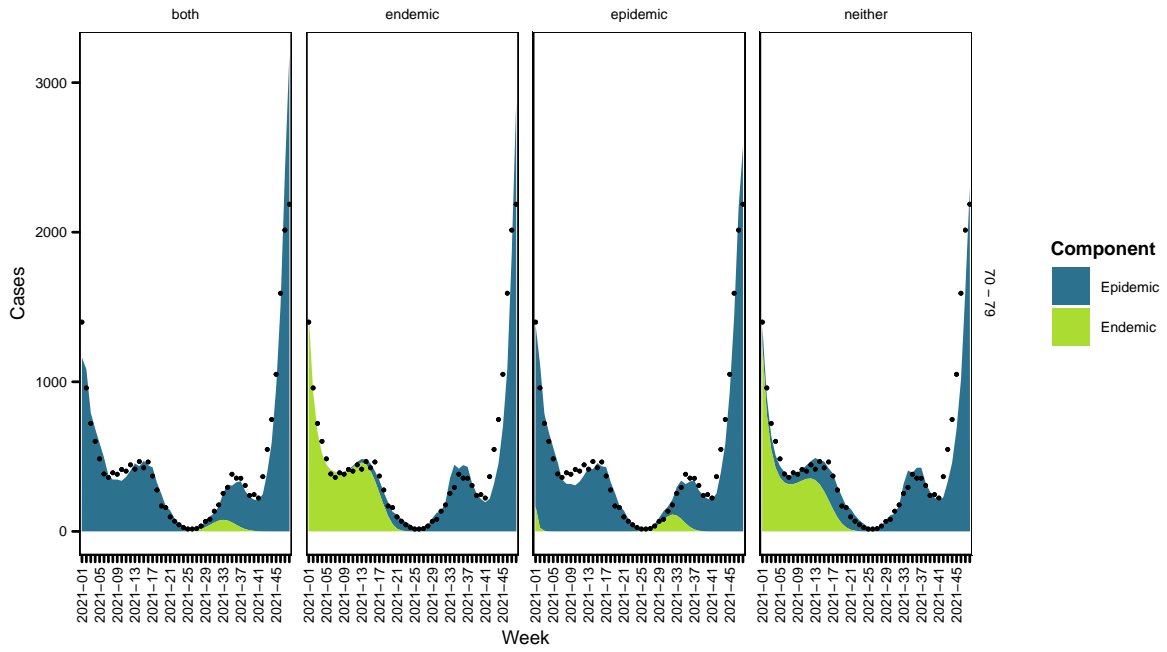

45

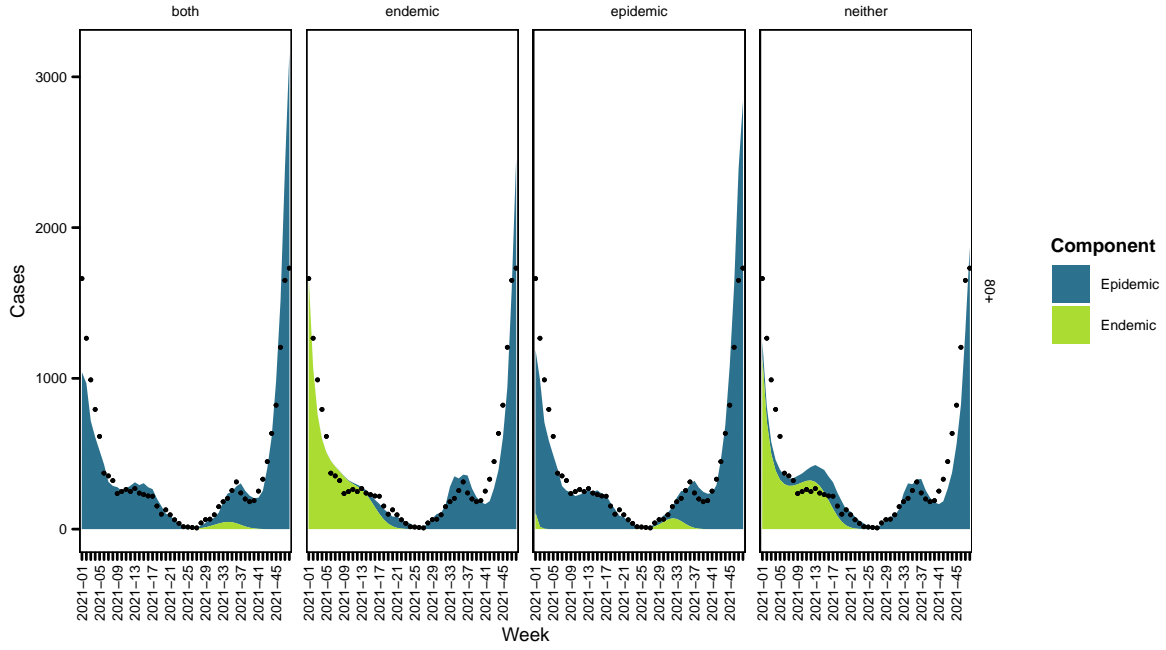

46

47 **2.2 Time-varying age group transmission weights**

48 Now the model contains the time-varying transmission weights. A snapshot is shown

49 below

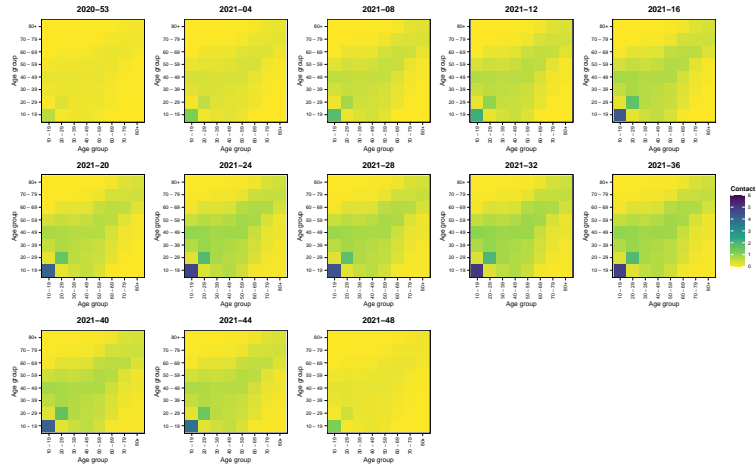

50

|                                   | neither            | endemic           | epidemic           | both              |
|-----------------------------------|--------------------|-------------------|--------------------|-------------------|
| $\alpha_{10-19}^{\phi}$           | -1.429 (SE 0.051)  | -1.681 (SE 0.041) | -1.357 (SE 0.048)  | -1.625 (SE 0.042) |
| $\alpha_{20-29}^{\phi}$           | -0.931 (SE 0.053)  | -1.239 (SE 0.042) | -0.753 (SE 0.053)  | -1.145 (SE 0.047) |
| $\alpha_{30-39}^{\phi}$           | -0.974 (SE 0.053)  | -1.167 (SE 0.04)  | -0.769 (SE 0.054)  | -1.073 (SE 0.046) |
| $\alpha_{40-49}^{\phi}$           | -1.296 (SE 0.052)  | -1.406 (SE 0.039) | -1.031 (SE 0.057)  | -1.296 (SE 0.047) |
| $\alpha_{50-59}^{\phi}$           | -1.257 (SE 0.053)  | -1.338 (SE 0.039) | -0.948 (SE 0.061)  | -1.215 (SE 0.049) |
| $\alpha_{60-69}^{\phi}$           | -1.449 (SE 0.053)  | -1.5 (SE 0.039)   | -1.082 (SE 0.066)  | -1.354 (SE 0.053) |
| $\alpha_{70-79}^{\phi}$           | -1.196 (SE 0.054)  | -1.21 (SE 0.04)   | -0.766 (SE 0.072)  | -1.04 (SE 0.058)  |
| $\alpha_{80+}^{\phi}$             | -0.541 (SE 0.054)  | -0.535 (SE 0.04)  | -0.084 (SE 0.077)  | -0.358 (SE 0.06)  |
| $\gamma_{\text{time}}^{\phi}$     | 0.018 (SE 0.003)   | 0.024 (SE 0.002)  | 0.029 (SE 0.003)   | 0.028 (SE 0.002)  |
| $\gamma_{\sin(2\pi t/52)}^{\phi}$ | 0.443 (SE 0.053)   | 0.661 (SE 0.042)  | 0.329 (SE 0.051)   | 0.604 (SE 0.044)  |
| $\gamma_{\cos(2\pi t/52)}^{\phi}$ | 0.653 (SE 0.034)   | 0.913 (SE 0.028)  | 0.633 (SE 0.03)    | 0.897 (SE 0.028)  |
| $\gamma_{\text{time}}^{\nu}$      | -0.715 (SE 0.023)  | -0.033 (SE 0.105) | -0.706 (SE 0.021)  | -0.053 (SE 0.105) |
| $\gamma_{\sin(2\pi t/52)}^{\nu}$  | -12.641 (SE 0.531) | -8.225 (SE 1.141) | -13.084 (SE 0.427) | -8.334 (SE 1.134) |
| $\gamma_{\cos(2\pi t/52)}^{\nu}$  | -6.101 (SE 0.337)  | -7.185 (SE 0.183) | -5.937 (SE 0.27)   | -7.127 (SE 0.182) |
| $\psi$                            | 0.11 (SE 0.008)    | 0.055 (SE 0.004)  | 0.094 (SE 0.007)   | 0.053 (SE 0.004)  |
| $\beta^{(\nu)}$                   |                    | 2.234 (SE 0.121)  |                    | 2.033 (SE 0.116)  |
| $\beta^{(\phi)}$                  |                    |                   | 0.578 (SE 0.07)    | 0.238 (SE 0.059)  |

51

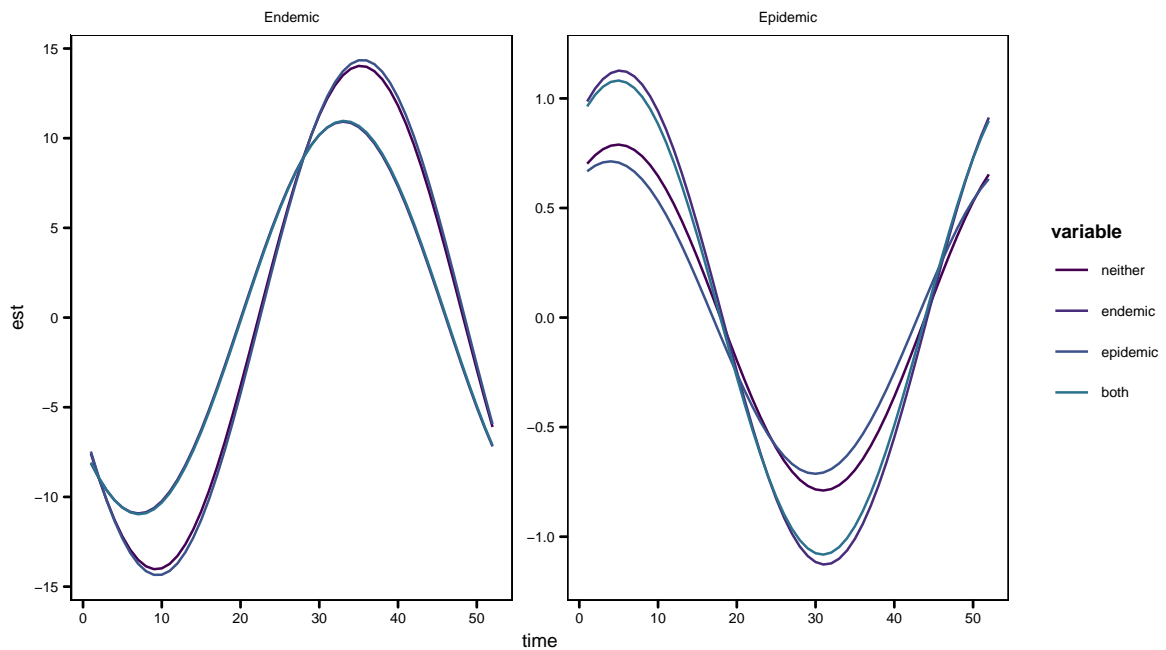

52

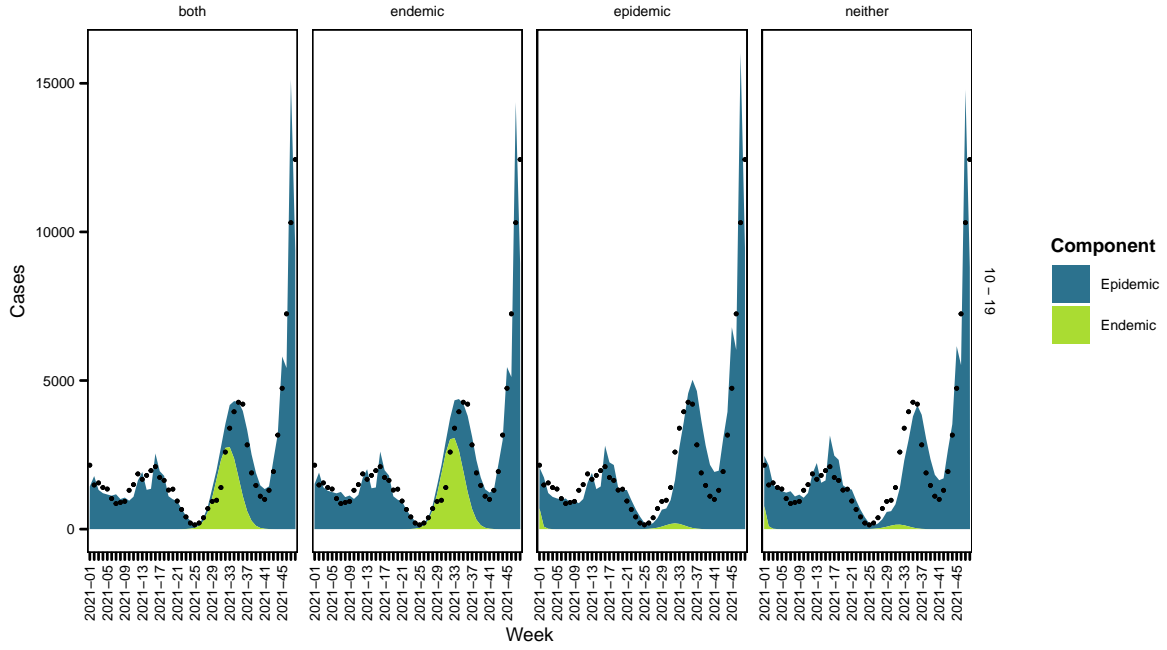

53

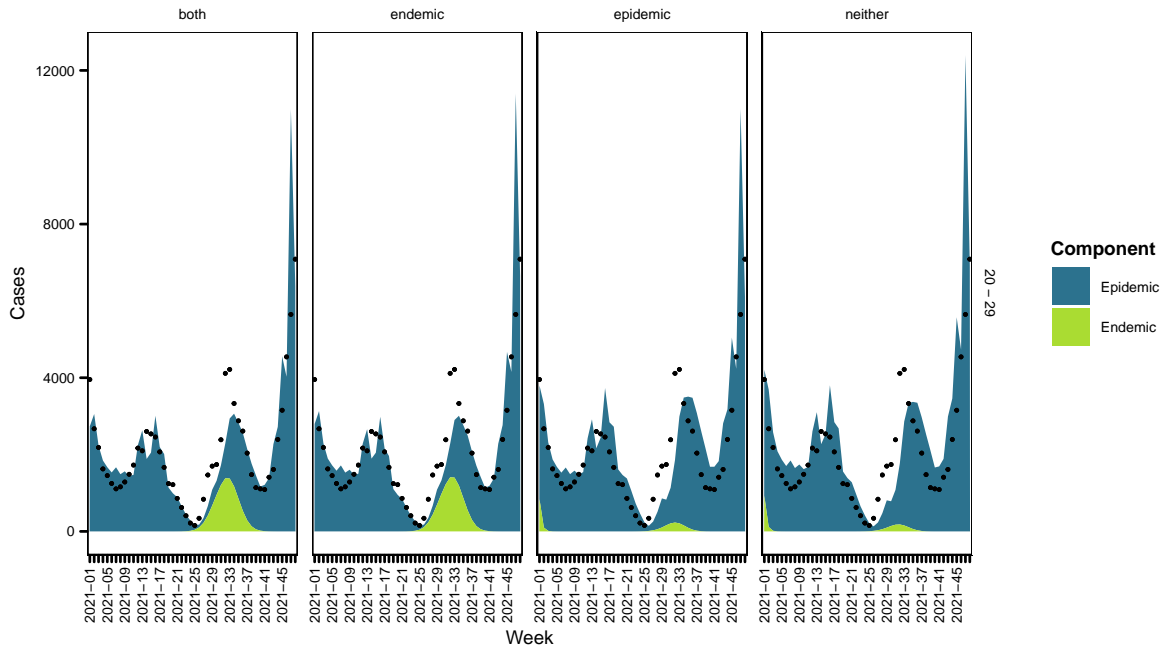

54

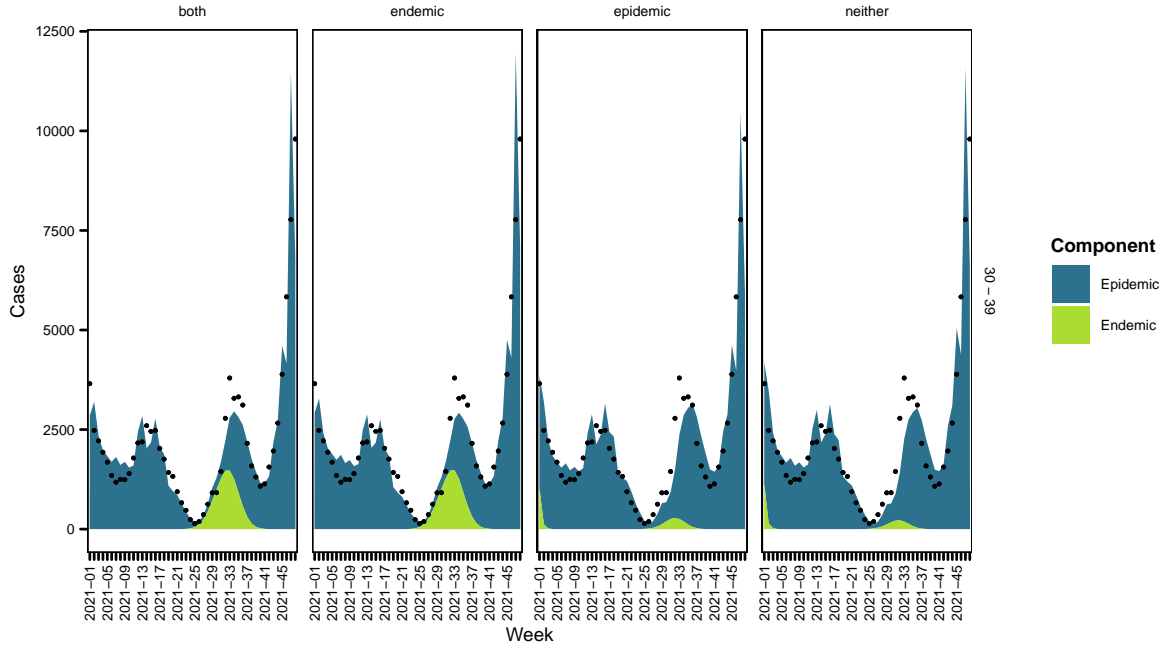

55

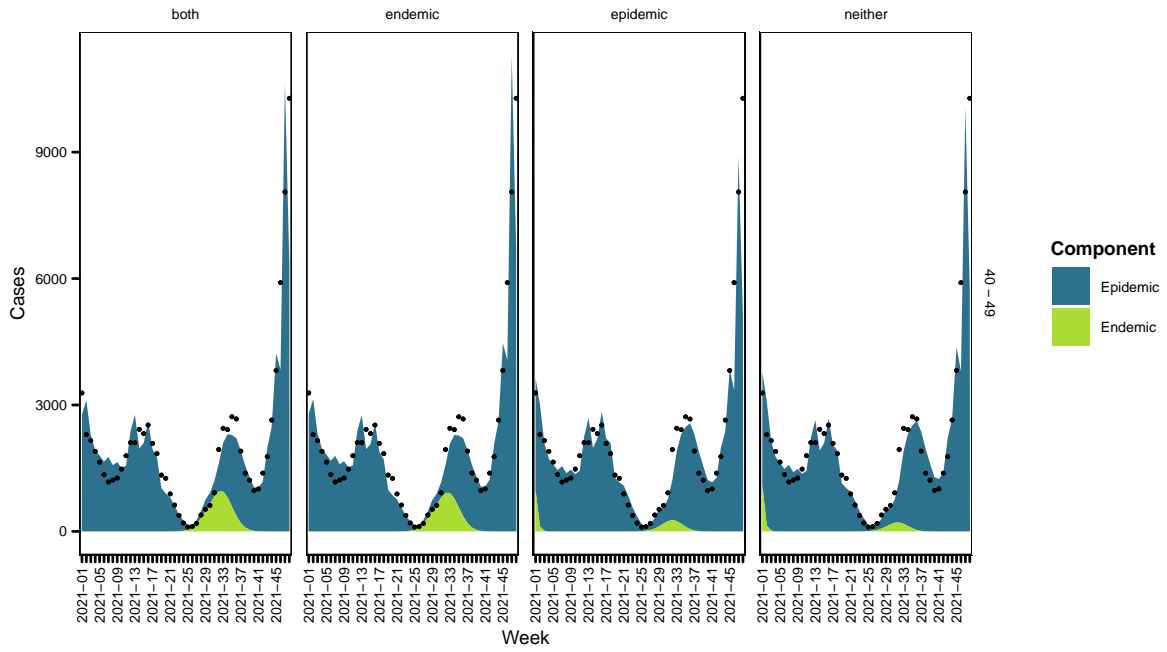

56

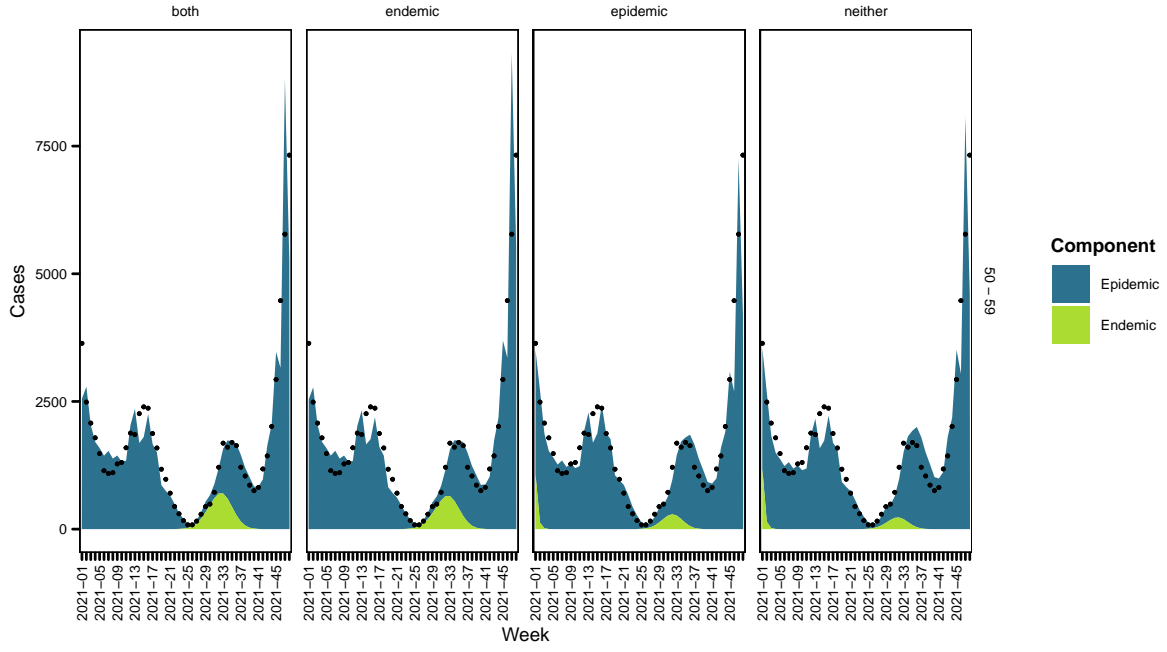

57

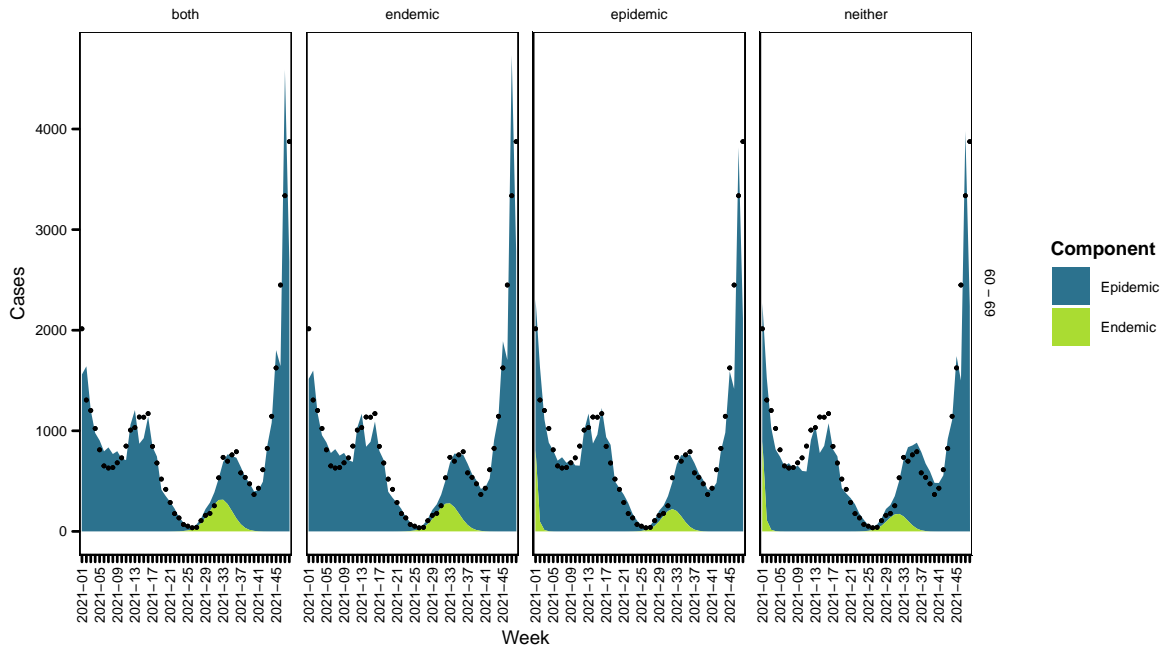

58

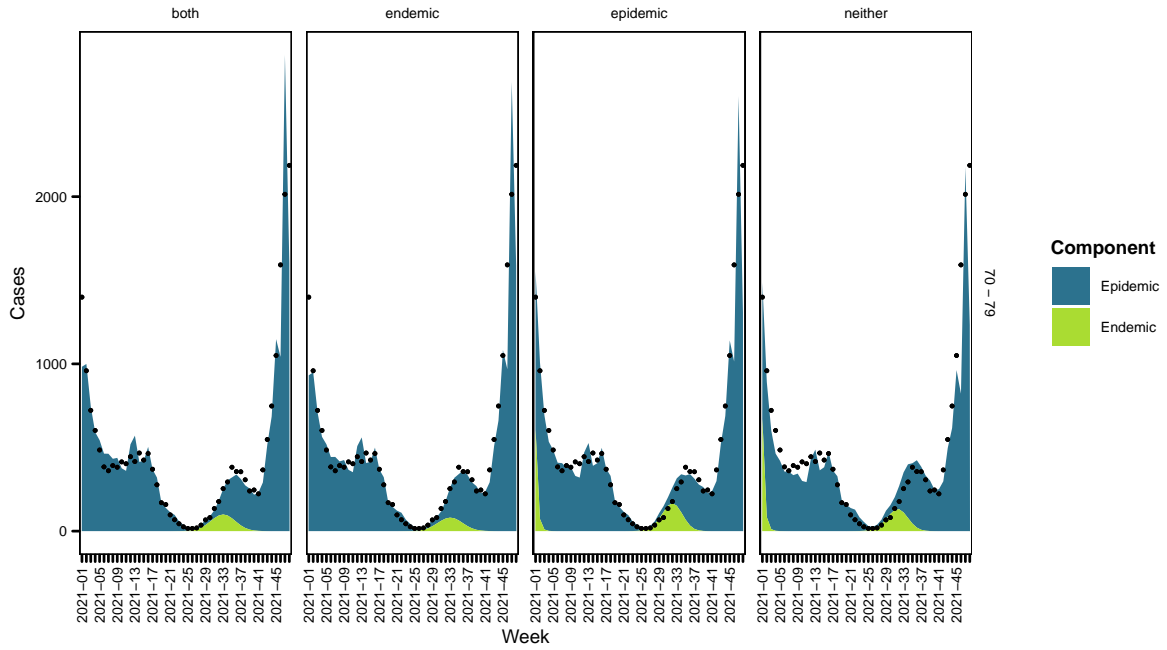

59

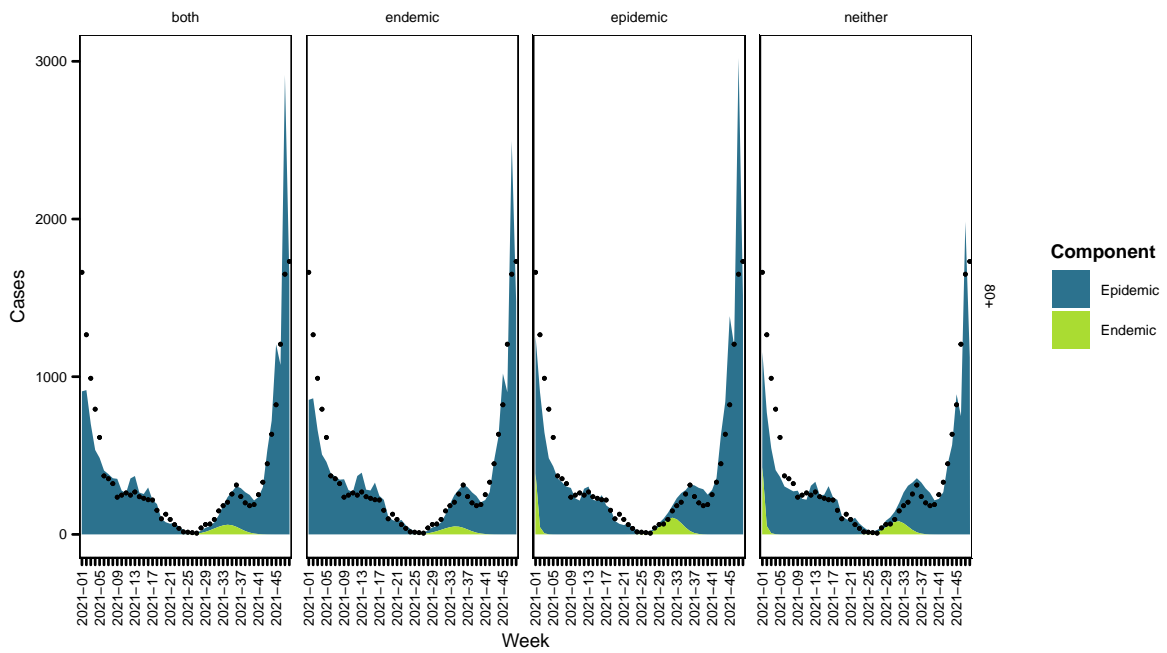

60

### 61 3 Scenario analysis

62 Now we consider the effects of an alternative distribution scheme of vaccination. At  
 63 each time point we count the total number of vaccines given and to evaluate the effects  
 64 of not following an age-based distribution scheme, we distribute them across age groups



65 proportional to the population size of the age group.

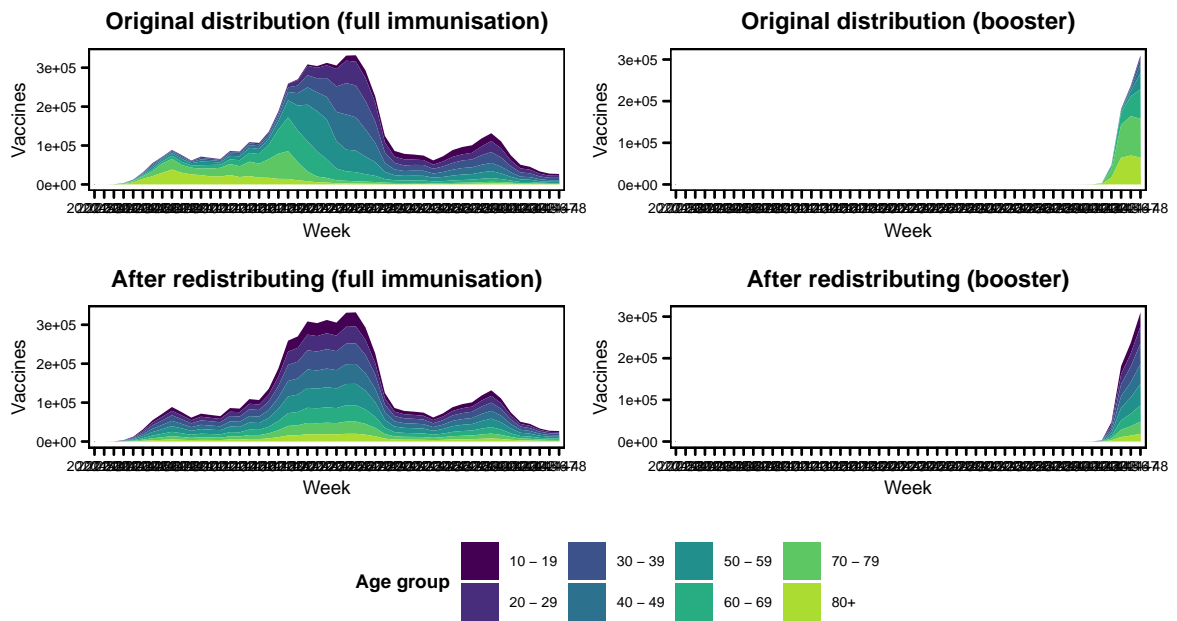

66

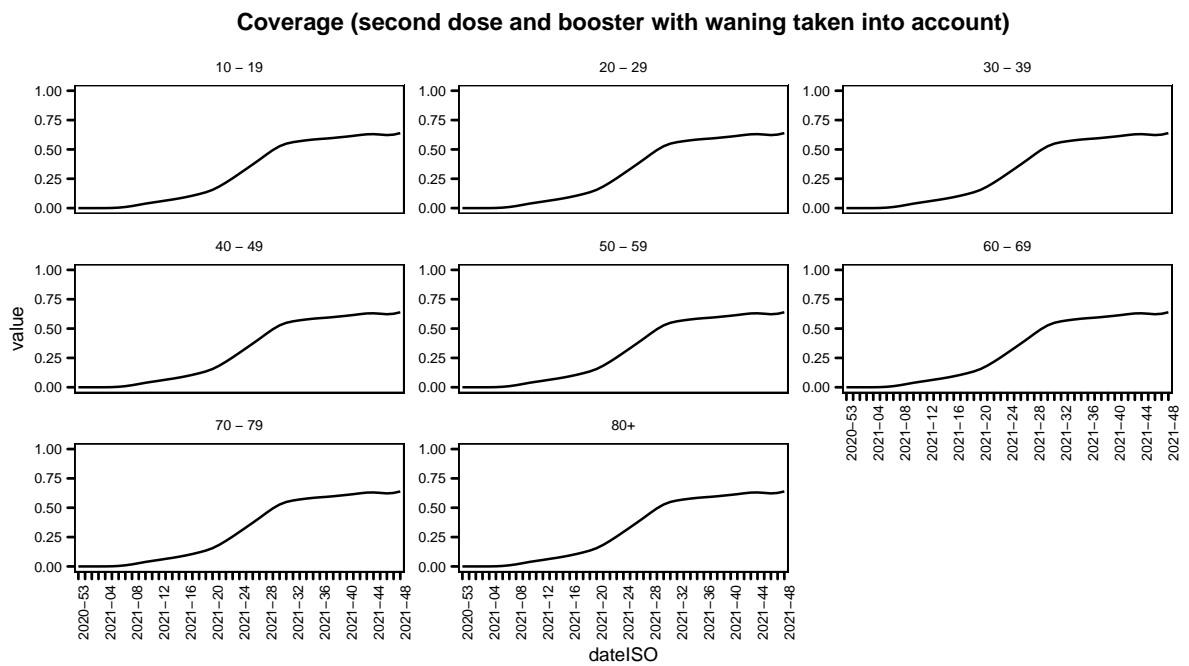

67

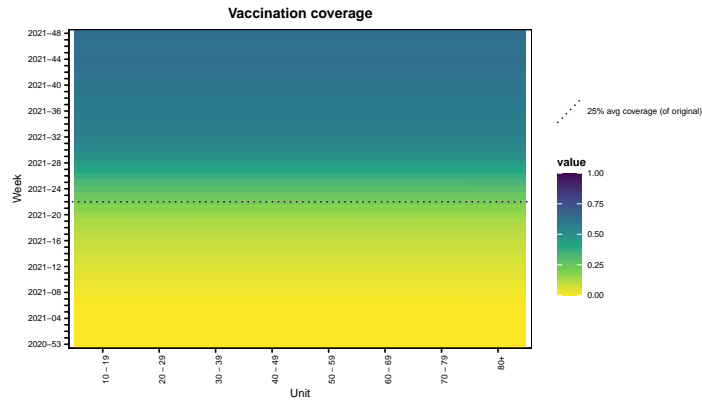

68

### 69 3.1 Predicted cases

70 Under the assumption that the study period covers the outbreak, we calculate the pre-  
 71 dicted number of COVID-19 cases under the alternative vaccination coverage scenario sce-  
 72 nario. This is using the same methods we have considered in previous work [see 2–4]. The  
 73 final size of the outbreak is given (Table 1). The weekly predicted cases for the model with  
 74 vaccination coverage in the endemic component with time-varying weights are presented  
 75 as this was the best fitting model as measured by DSS. We compare the predictions un-  
 76 der the true vaccination coverage (as observed by BAG) and the alternative scenario of  
 77 redistributed coverage. The ratio is the ratio of predicted cases under the alternative vac-  
 78 cination coverage scenario against predicted cases under the observed vaccination coverage  
 79 scenario.

80 Below we show predicted cases under the two vaccination coverages (as observed and  
 81 maximum coverage across regions) and ratio between the two

**Table 1:** Final size estimates based on path forecasts

|         | True  | Original coverage |          |        | Alternative coverage |          |       |
|---------|-------|-------------------|----------|--------|----------------------|----------|-------|
|         |       | Endemic           | Epidemic | Both   | Endemic              | Epidemic | Both  |
| 10 - 19 | 73195 | 115341            | 497769   | 151064 | 54394                | 54878    | 44820 |
| 20 - 29 | 59099 | 94228             | 282376   | 105667 | 54644                | 74290    | 49647 |
| 30 - 39 | 62337 | 93760             | 265990   | 106912 | 54640                | 63686    | 49436 |
| 40 - 49 | 55949 | 84499             | 226076   | 95705  | 51097                | 57481    | 46829 |
| 50 - 59 | 40373 | 68097             | 171177   | 75906  | 44217                | 49229    | 41602 |
| 60 - 69 | 20807 | 33111             | 78320    | 36738  | 24494                | 26597    | 24109 |
| 70 - 79 | 11779 | 17250             | 49350    | 20853  | 14677                | 15245    | 15032 |
| 80+     | 9342  | 15400             | 59054    | 21075  | 12319                | 13778    | 12827 |

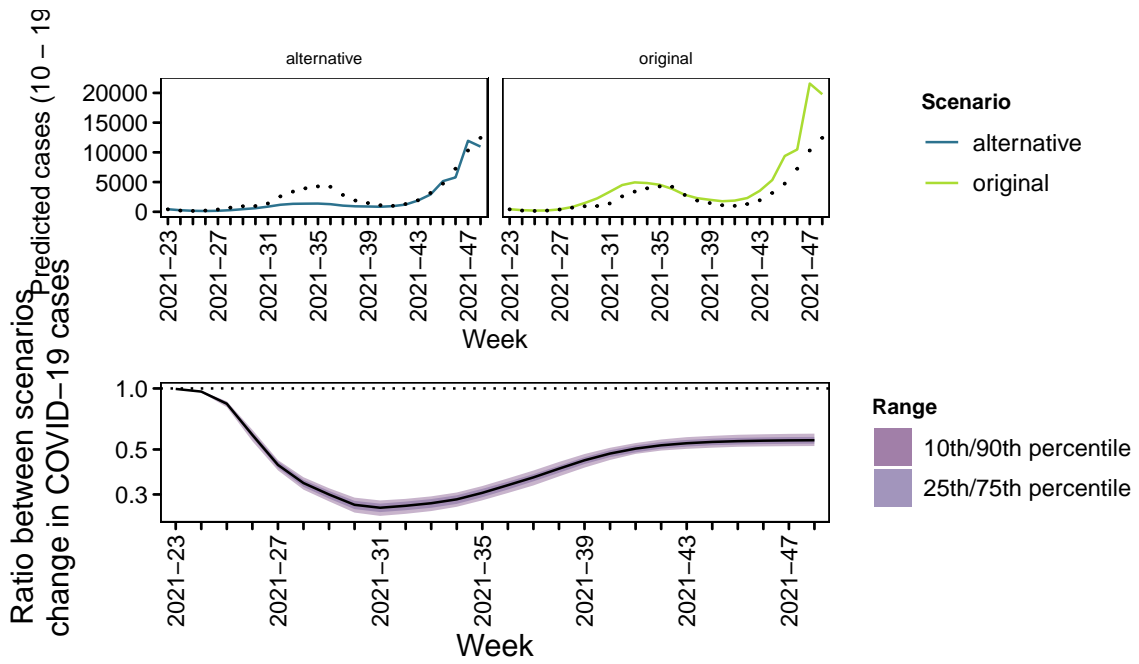

Ratio between scenarios  $\frac{\text{Predicted cases (20 - 29)}}{\text{change in COVID-19 cases}}$

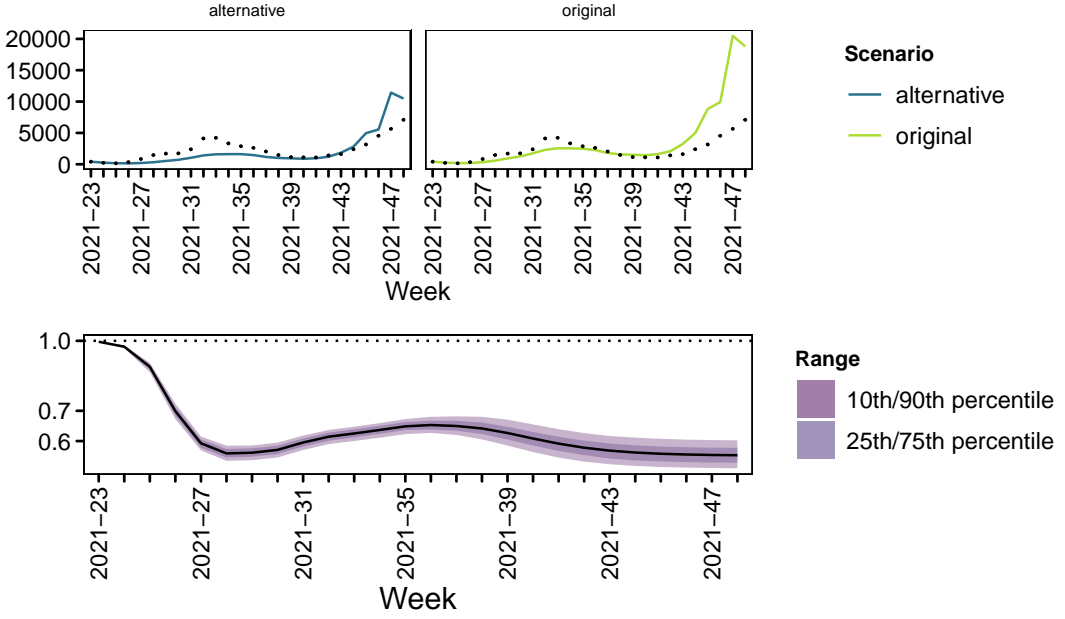

83

Ratio between scenarios  $\frac{\text{Predicted cases (30 - 39)}}{\text{change in COVID-19 cases}}$

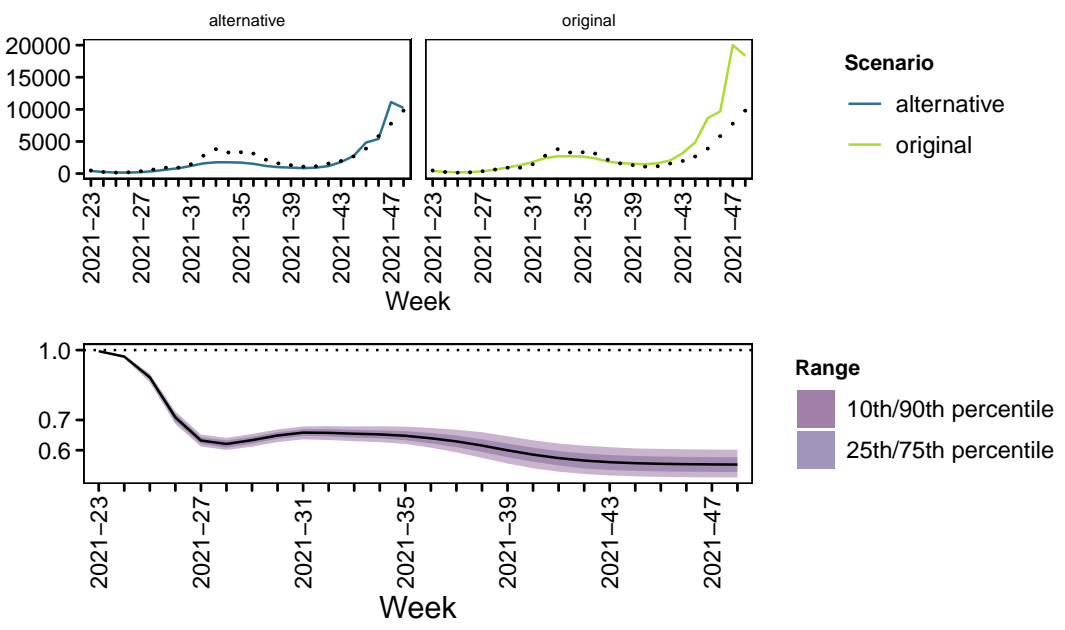

84

Ratio between scenarios  $\frac{\text{Predicted cases (40 - 49)}}{\text{change in COVID-19 cases}}$

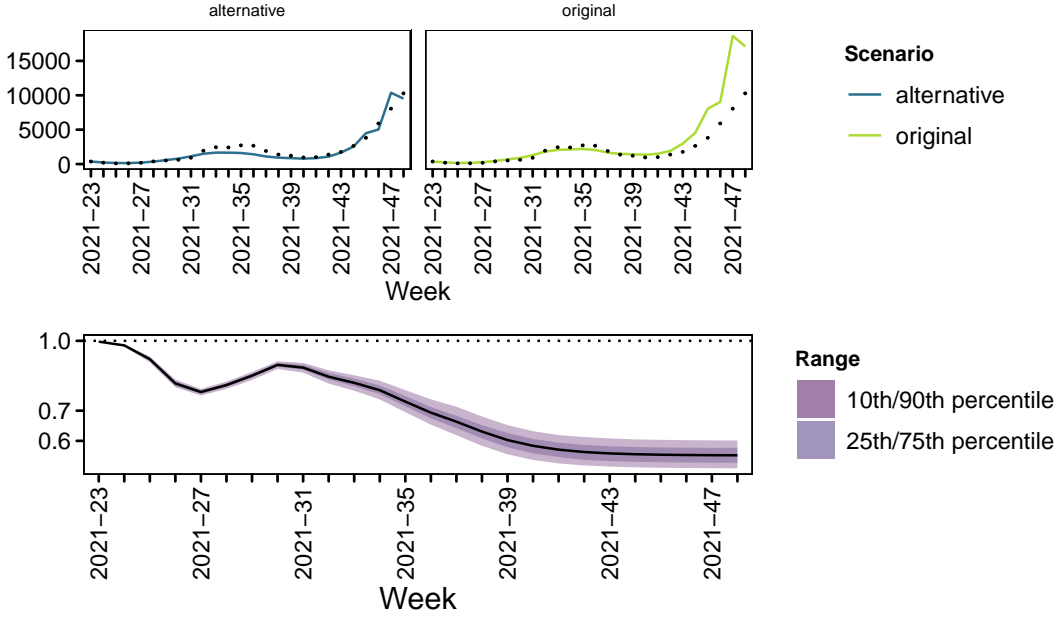

85

Ratio between scenarios  $\frac{\text{Predicted cases (50 - 59)}}{\text{change in COVID-19 cases}}$

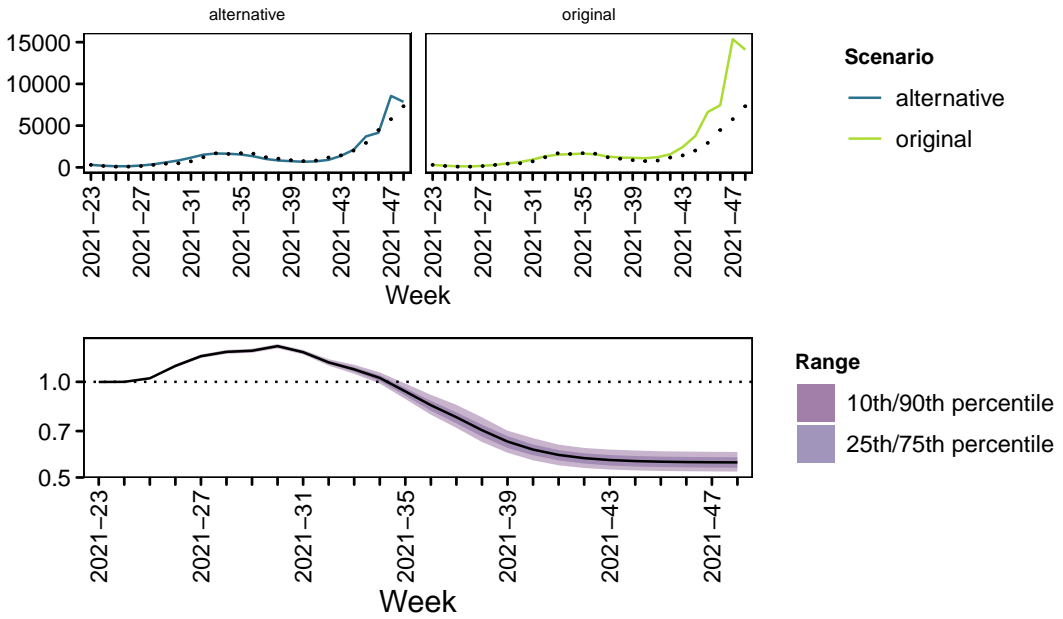

86

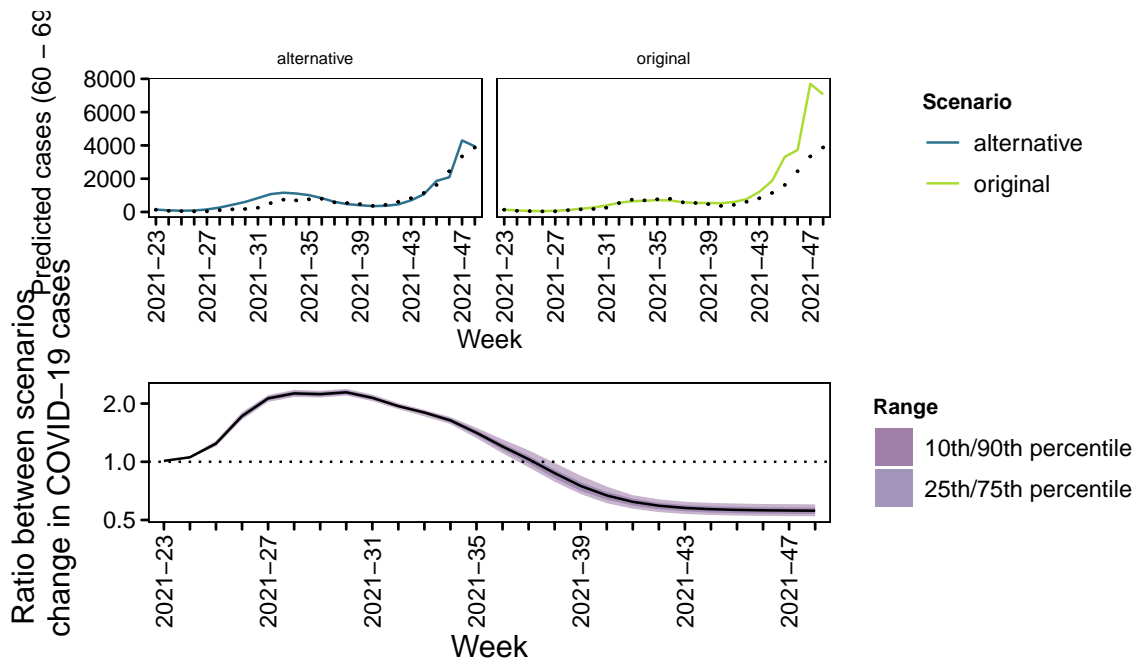

87

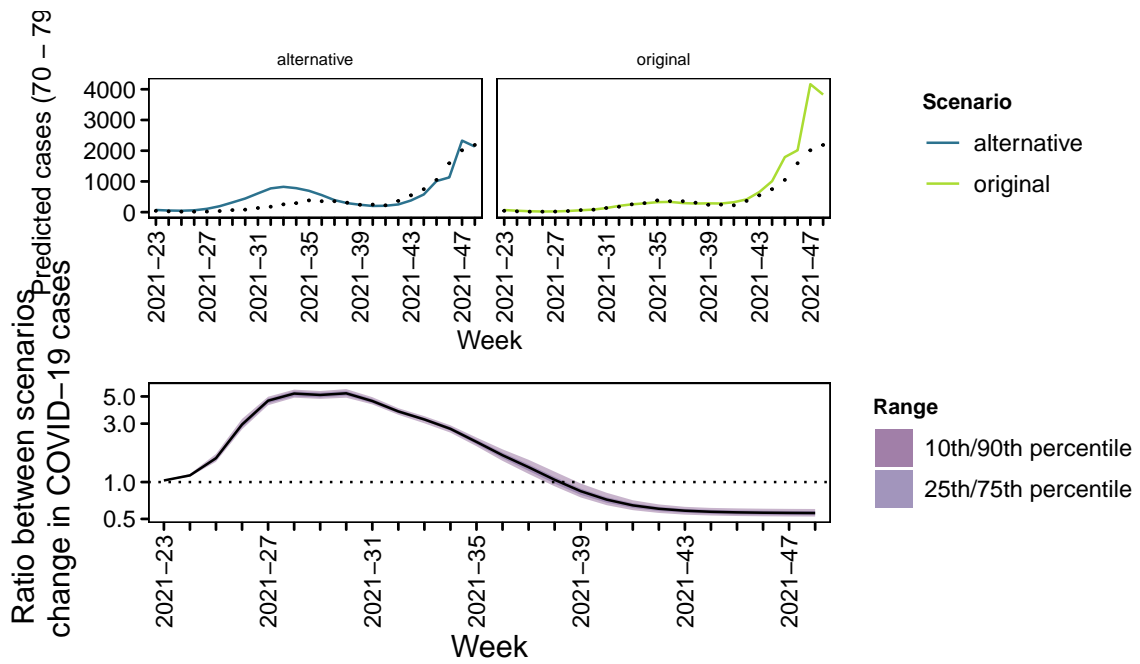

88

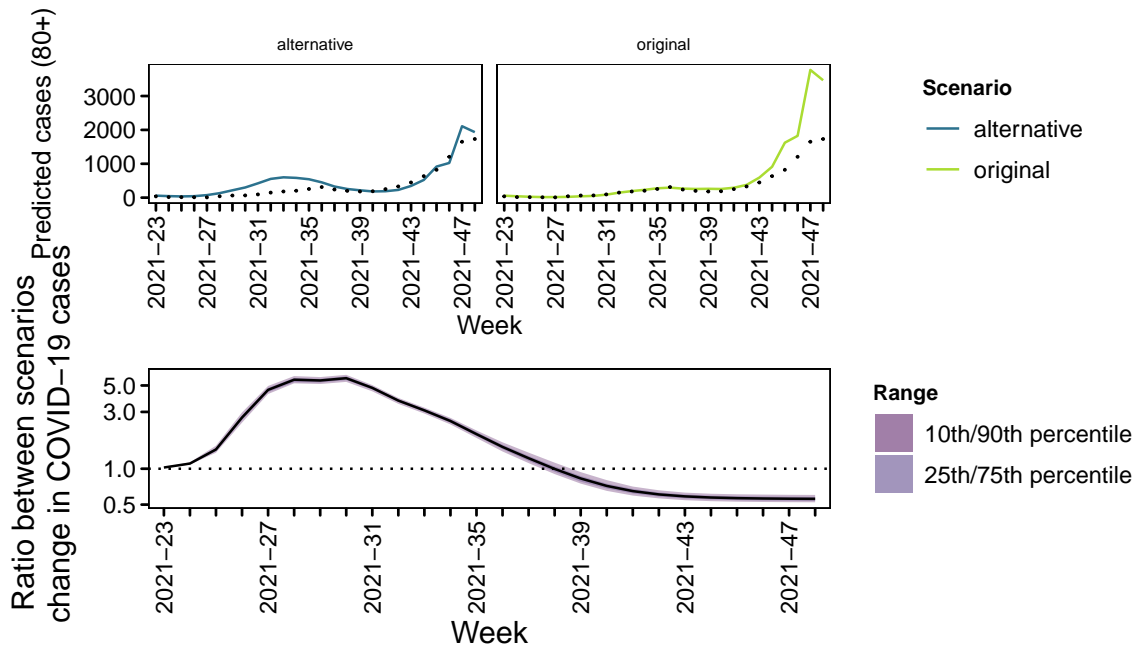

89

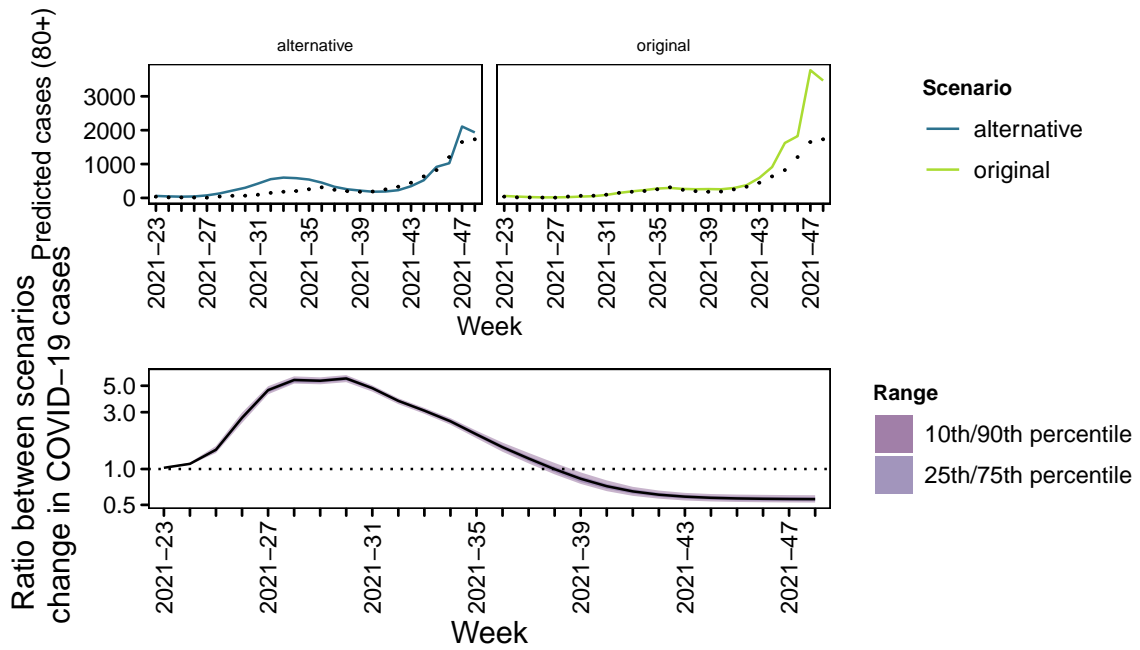

90

91 **References**

92 [1] M. Bekker-Nielsen Dunbar and L. Held. STUDY PROTOCOL: The COVID-19 vaccina-  
 93 tion campaign in Switzerland and its impact on disease spread. *Open Science Founda-*  
 94 *tion*, 2022. DOI:[10.17605/OSF.IO/6X4VK](https://doi.org/10.17605/OSF.IO/6X4VK).

- 95 [2] M. Grimée, M. Bekker-Nielsen Dunbar (joint first authors), F. Hofmann, and L. Held.  
96 Modelling the effect of a border closure between Switzerland and Italy on the spa-  
97 tiotemporal spread of COVID-19 in Switzerland. *Spatial Statistics*, page 100552, 2021.  
98 DOI:[10.1016/j.spasta.2021.100552](https://doi.org/10.1016/j.spasta.2021.100552).
- 99 [3] M. Bekker-Nielsen Dunbar, F. Hoffmann, and L. Held. Assessing the effect of school  
100 closures on the spread of COVID-19 in Zurich. *Journal of the Royal Statistical Society*  
101 *Series A*, 2022. DOI:[10.1111/rssa.12910](https://doi.org/10.1111/rssa.12910).
- 102 [4] M. Bekker-Nielsen Dunbar, F. Hofmann, S. Meyer, and L. Held (joint last authors).  
103 Endemic-epidemic modelling of school closure to prevent spread of COVID-19 in  
104 Switzerland (protocol available at DOI:[10.17605/osf.io/qh3gd](https://doi.org/10.17605/osf.io/qh3gd)). *medRxiv*, 2023.  
105 DOI:[10.1101/2023.03.21.23287519](https://doi.org/10.1101/2023.03.21.23287519).
