# Supplementary material for: The COVID-19 vaccination campaign in Switzerland and its impact on disease spread
Source: bioRxiv or medRxiv preprint supplement (doi:10.1101/2023.04.06.23288251), 2023-04-12
Supplement: Supplementary file [file media-2.pdf]

**The COVID-19 vaccination campaign in Switzerland and its impact on disease spread**

**MODEL – regions only  $Y_{rt}$ , transmission weights  $w = (w_{r,r',t})$**

M. Bekker-Nielsen Dunbar and L. Held

Epidemiology, Biostatistics and Prevention Institute, University of Zurich

E-mail: [maria.dunbar@uzh.ch](mailto:maria.dunbar@uzh.ch)

- 1 This document contains additional models to those outlined in the study protocol [1].  
 2 Knowledge of the analyses from the main manuscript is assumed. The models introduced  
 3 here have only regional effects. This means we are comparing the models:

$$\log(\nu_{rt}) = \alpha_r^{(\nu)} + \gamma^{(\nu)\top} \mathbf{z}_{rt}^{(\nu)} \quad (\text{neither})$$

$$\log(\phi_{rt}) = \alpha_r^{(\phi)} + \gamma^{(\phi)\top} \mathbf{z}_{rt}^{(\phi)}$$

$$\log(\nu_{rt}) = \alpha_r^{(\nu)} + \beta_r^{(\nu)} \log(1 - x_{rt}) + \gamma^{(\nu)\top} \mathbf{z}_{rt}^{(\nu)} \quad (\text{endemic})$$

$$\log(\phi_{rt}) = \alpha_r^{(\phi)} + \gamma^{(\phi)\top} \mathbf{z}_{rt}^{(\phi)}$$

$$\log(\nu_{rt}) = \alpha_r^{(\nu)} + \gamma^{(\nu)\top} \mathbf{z}_{rt}^{(\nu)} \quad (\text{epidemic})$$

$$\log(\phi_{rt}) = \alpha_r^{(\phi)} + \beta_r^{(\phi)} \log(1 - x_{rt}) + \gamma^{(\phi)\top} \mathbf{z}_{rt}^{(\phi)}$$

$$\log(\nu_{rt}) = \alpha_r^{(\nu)} + \beta_r^{(\nu)} \log(1 - x_{rt}) + \gamma^{(\nu)\top} \mathbf{z}_{rt}^{(\nu)} \quad (\text{both})$$

$$\log(\phi_{rt}) = \alpha_r^{(\phi)} + \beta_r^{(\phi)} \log(1 - x_{rt}) + \gamma^{(\phi)\top} \mathbf{z}_{rt}^{(\phi)}$$

- 4  $\mathbf{z}_{rt}$  is as given in the main manuscript.

## 5 1 Setup

6 The study period is 1st January 2021 to 30th November 2021 given by ISO weeks  
7 2020-53 to 2021-48, both weeks included. This is a deviation from the protocol. The new  
8 study period is chosen on the basis of the epidemic calendar. This is similar to influenza  
9 research in the northern hemisphere; we want our years to start and end such that the en-  
10 tire expected wave is captured in a single year. Furthermore, the latter cut-off was chosen  
11 due to the presence of Omicron variant COVID-19 in the original study period. The rea-  
12 son for this is that the vaccines considered in this work were not created with this variant  
13 in mind and may provide less protection against this disease. The study period covers 49  
14 observations.

### 15 1.1 Outcome

16 The outcome variable is cases. Here we consider all cases (i.e. not limited to hospitali-  
17 sations). The cases are not equally distributed across cantons:

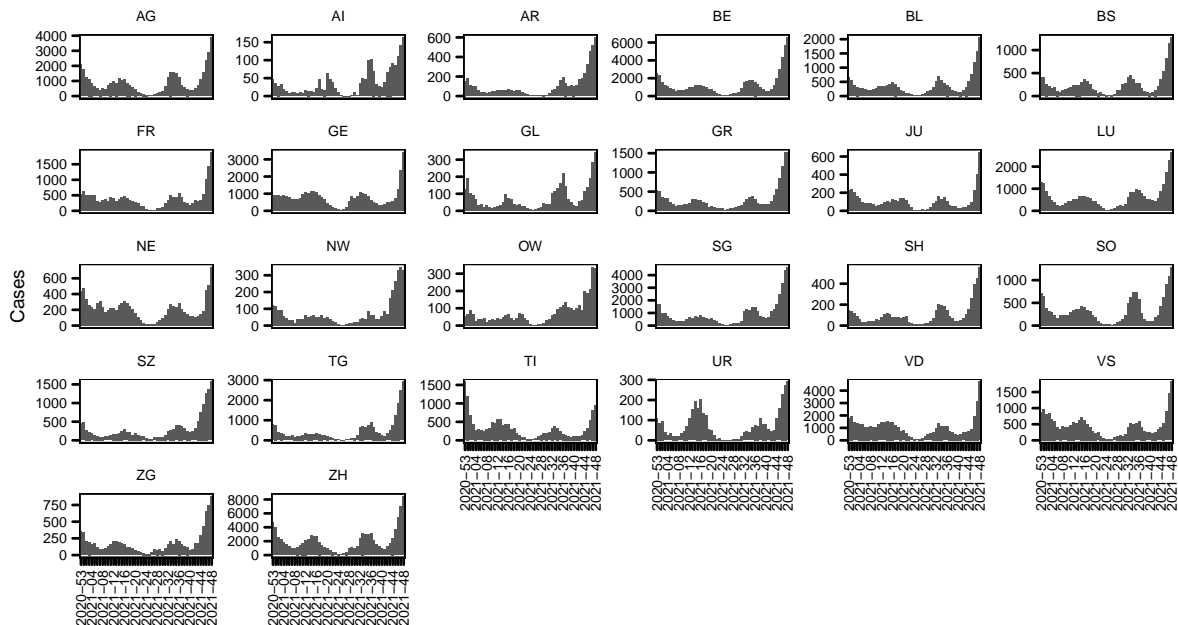

18

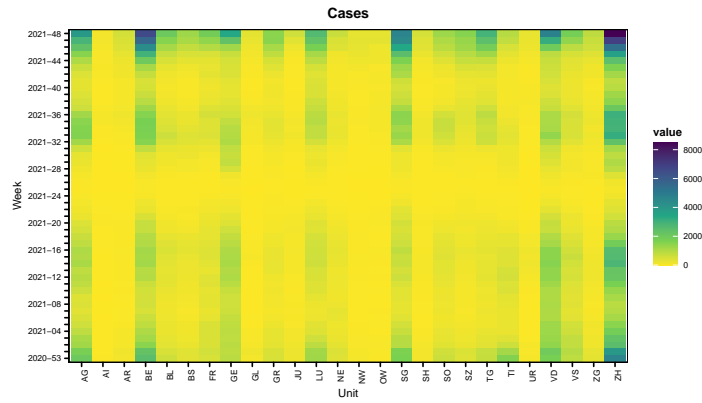

19

20 Taking into account that different cantons have different populations, differences in  
 21 burden of disease are still evident

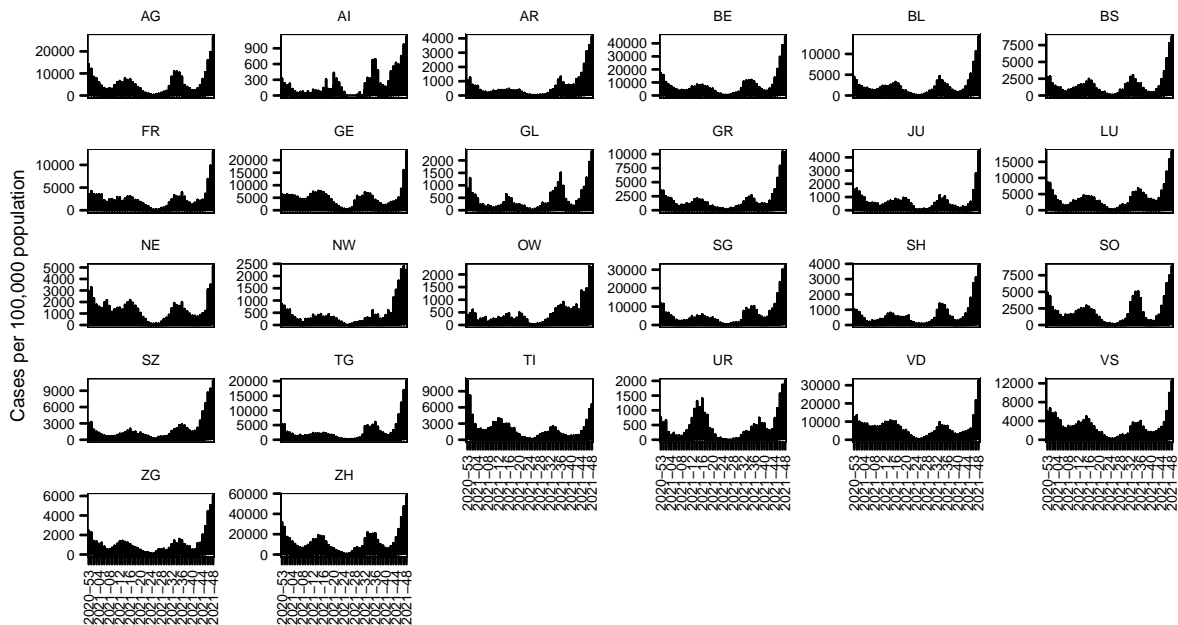

22

## 23 1.2 Covariates

24 The vaccination coverage looks as follows

### Coverage (second dose and booster with waning taken into account)

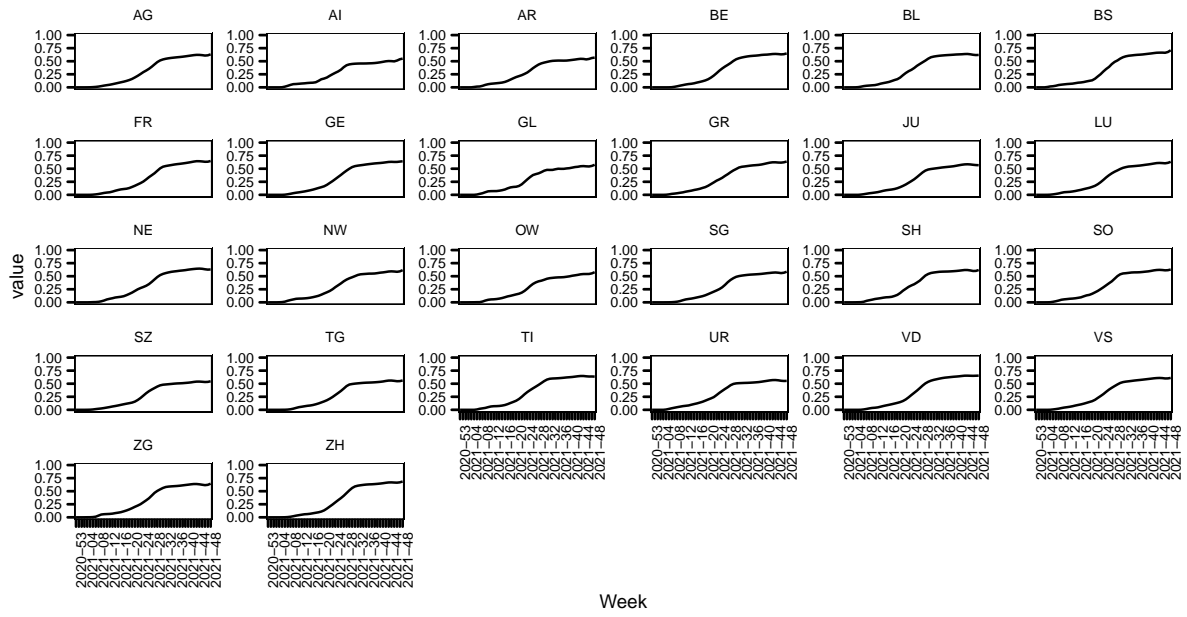

25

### Vaccination coverage

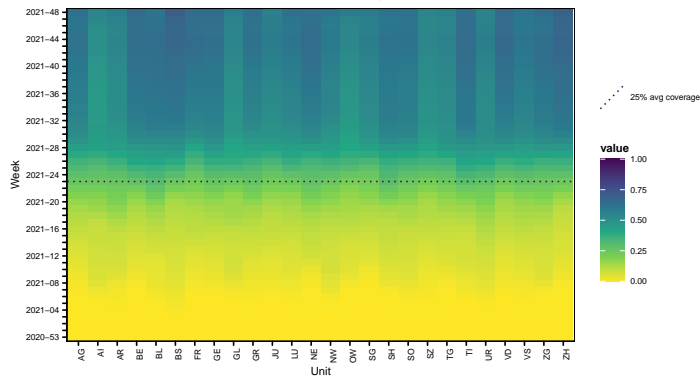

26

27

Transformed by  $f(x) = \log(1 - x)$  this looks like

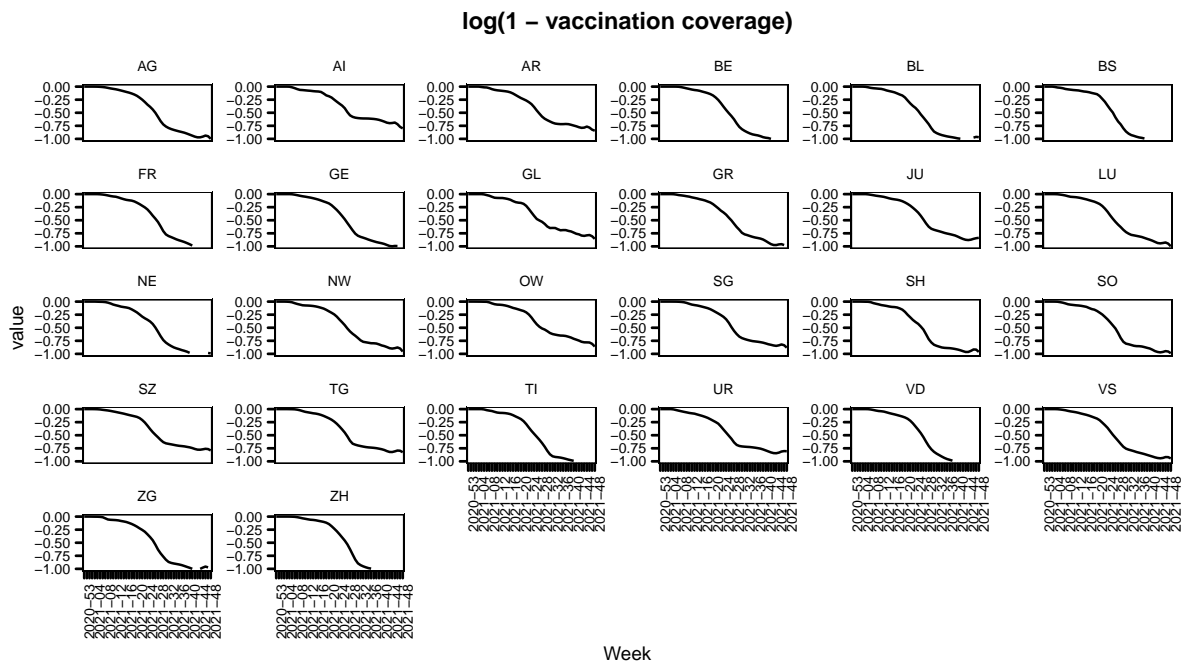

28

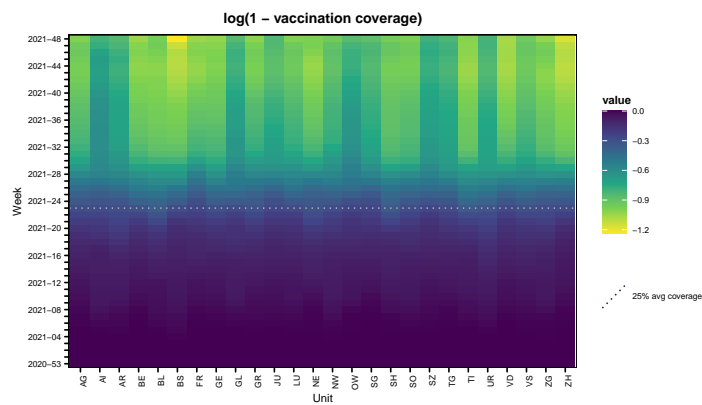

29

## 30 2 Results overview

31 The following table provides the estimated effects of vaccination coverage for models  
 32 with and without time-varying transmission weights.

```
## ! Non-convergence message from optimizer: iteration limit reached without converge
## Update of regression coefficients in iteration 1 unreliable
## ! Non-convergence message from optimizer: iteration limit reached without converge
## Update of regression coefficients in iteration 1 unreliable
```

| Weights  | Model    | Endemic          | Epidemic         | $\ell$    | DSS    |
|----------|----------|------------------|------------------|-----------|--------|
| Constant | Neither  |                  |                  | -7198.294 | 15.253 |
| Constant | Endemic  | 4.401 (SE 1.343) |                  | -7190.34  | 15.337 |
| Constant | Epidemic |                  | 3.251 (SE 0.216) | -7096.772 | 15.236 |
| Constant | Both     | 1.677 (SE 1.038) | 3.206 (SE 0.216) | -7093.356 | 15.241 |
| Varying  | Neither  |                  |                  | -7091.831 | 13.787 |
| Varying  | Endemic  | 3.312 (SE 1.035) |                  | -7084.242 | 13.742 |
| Varying  | Epidemic |                  | 2.688 (SE 0.201) | -7010.947 | 17.084 |
| Varying  | Both     | 1.739 (SE 0.846) | 2.642 (SE 0.2)   | -7006.704 | 16.988 |

33

## 34 2.1 Time-constant regional transmission weights

35

First we present the results of the modelling with the time-constant transmission weights.

|                                 | neither           | endemic            | epidemic          | both              |
|---------------------------------|-------------------|--------------------|-------------------|-------------------|
| $\gamma_{\sin(2\pi t/52)}^\phi$ | 0.405 (SE 0.043)  | 0.43 (SE 0.043)    | -0.132 (SE 0.053) | -0.123 (SE 0.053) |
| $\gamma_{\cos(2\pi t/52)}^\phi$ | 0.335 (SE 0.025)  | 0.352 (SE 0.025)   | 0.45 (SE 0.026)   | 0.451 (SE 0.026)  |
| $\gamma_{\text{gravity}}^\phi$  | 0.915 (SE 0.043)  | 0.918 (SE 0.043)   | 0.984 (SE 0.036)  | 0.984 (SE 0.036)  |
| $\gamma_{\text{time}}^\phi$     | 0.029 (SE 0.002)  | 0.03 (SE 0.002)    | 0.087 (SE 0.004)  | 0.086 (SE 0.004)  |
| $\alpha_{\text{region}}^\phi$   | -1.568 (SE 0.17)  | -1.57 (SE 0.171)   | 0.03 (SE 0.176)   | 0.01 (SE 0.177)   |
| $\gamma_{\sin(2\pi t/52)}^\nu$  | -9.468 (SE 0.69)  | -11.773 (SE 1.015) | -9.282 (SE 0.487) | -10.29 (SE 0.795) |
| $\gamma_{\cos(2\pi t/52)}^\nu$  | -3.993 (SE 0.499) | -4.646 (SE 0.534)  | -3.623 (SE 0.317) | -3.991 (SE 0.393) |
| $\gamma_{\text{time}}^\nu$      | -0.467 (SE 0.045) | -0.446 (SE 0.042)  | -0.424 (SE 0.03)  | -0.426 (SE 0.03)  |
| $\alpha_{\text{region}}^\nu$    | 2.932 (SE 0.492)  | 4.259 (SE 0.593)   | 3.36 (SE 0.339)   | 3.751 (SE 0.423)  |
| $\psi$                          | 0.141 (SE 0.006)  | 0.138 (SE 0.006)   | 0.119 (SE 0.005)  | 0.118 (SE 0.005)  |
| $\beta^{(\nu)}$                 |                   | 4.401 (SE 1.343)   |                   | 1.677 (SE 1.038)  |
| $\beta^{(\phi)}$                |                   |                    | 3.251 (SE 0.216)  | 3.206 (SE 0.216)  |

36

37

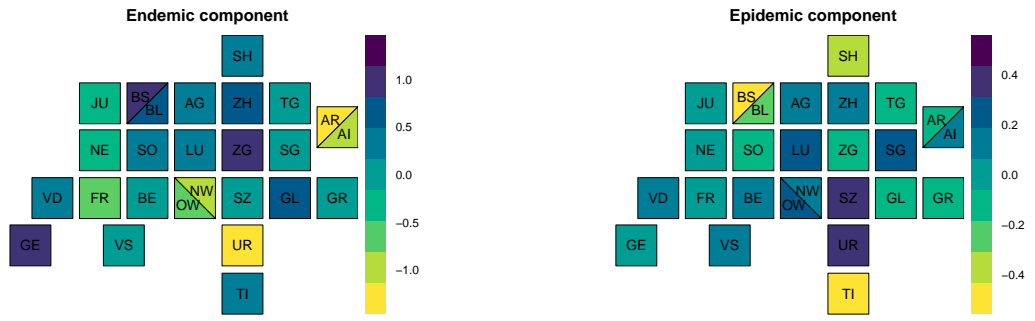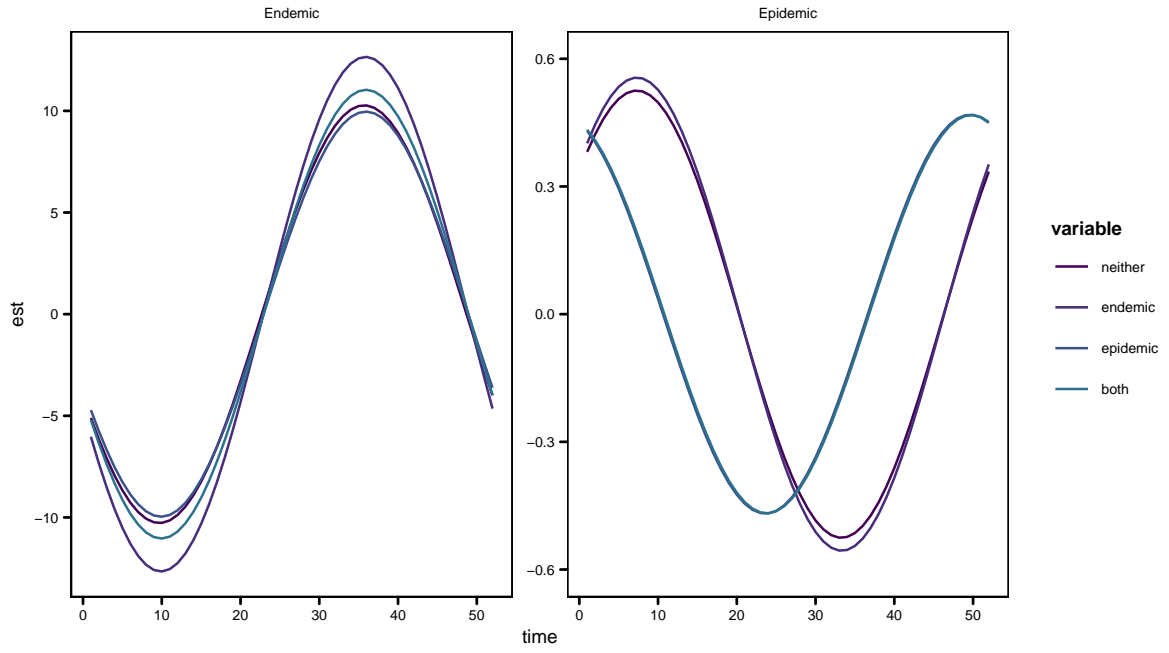

38

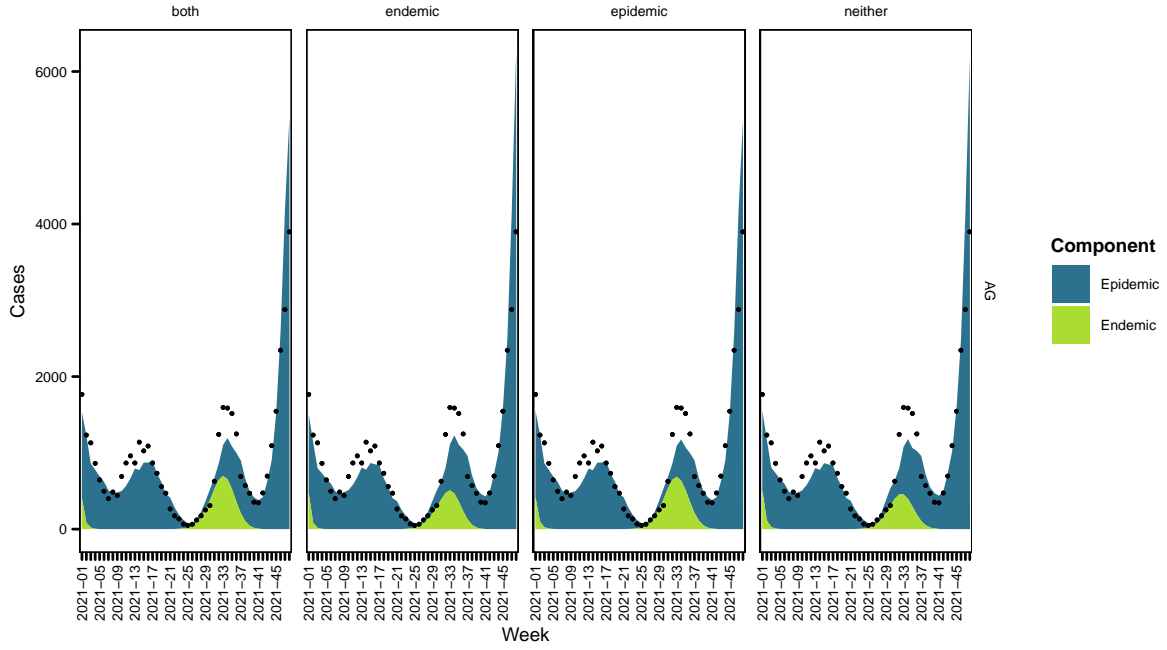

39

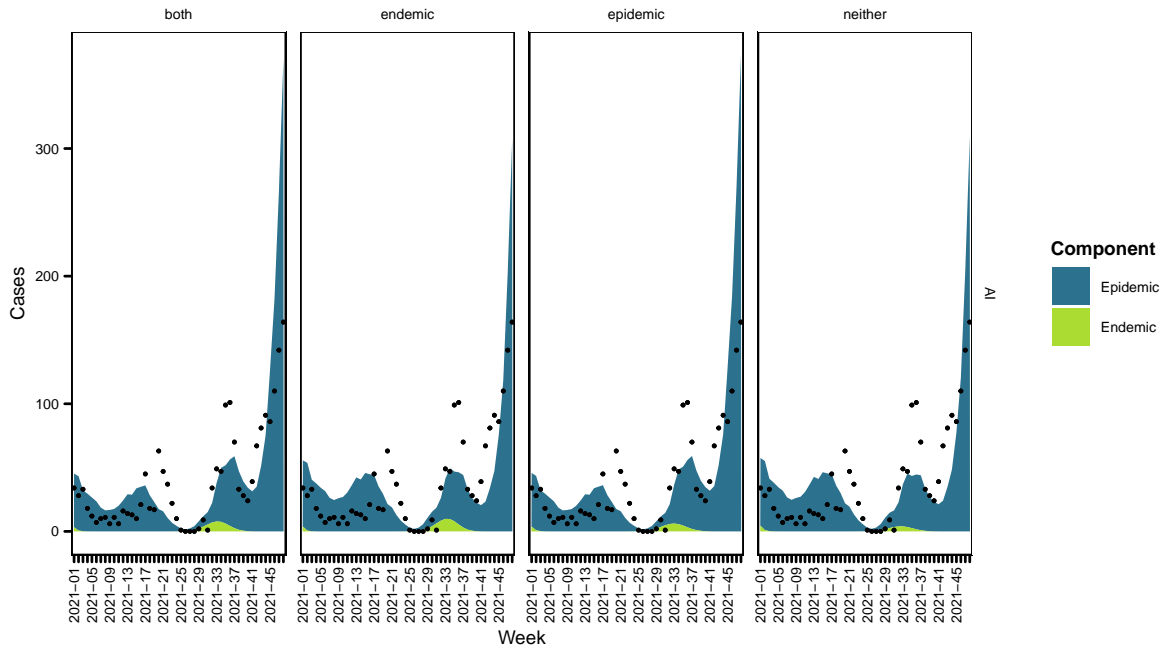

40



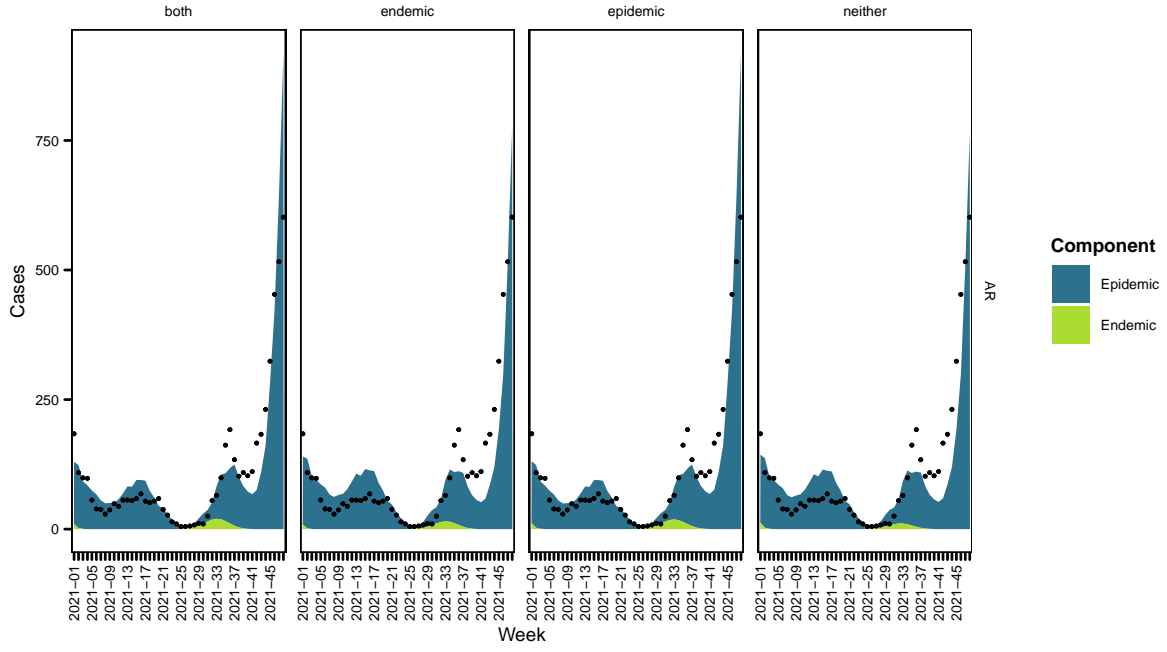

41

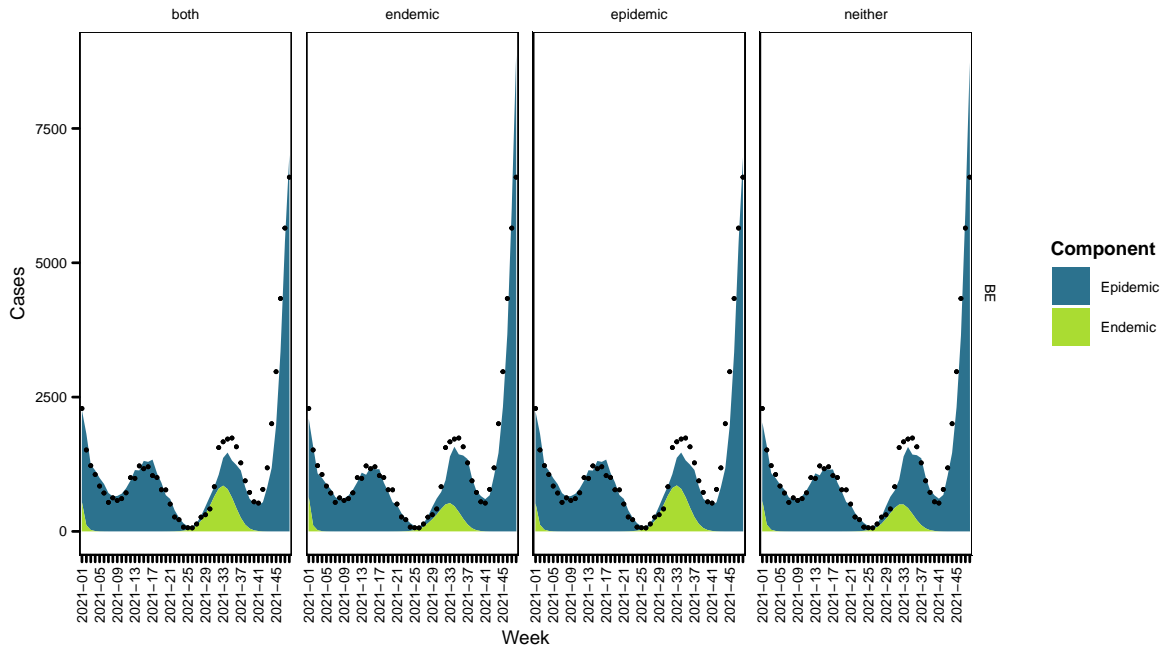

42

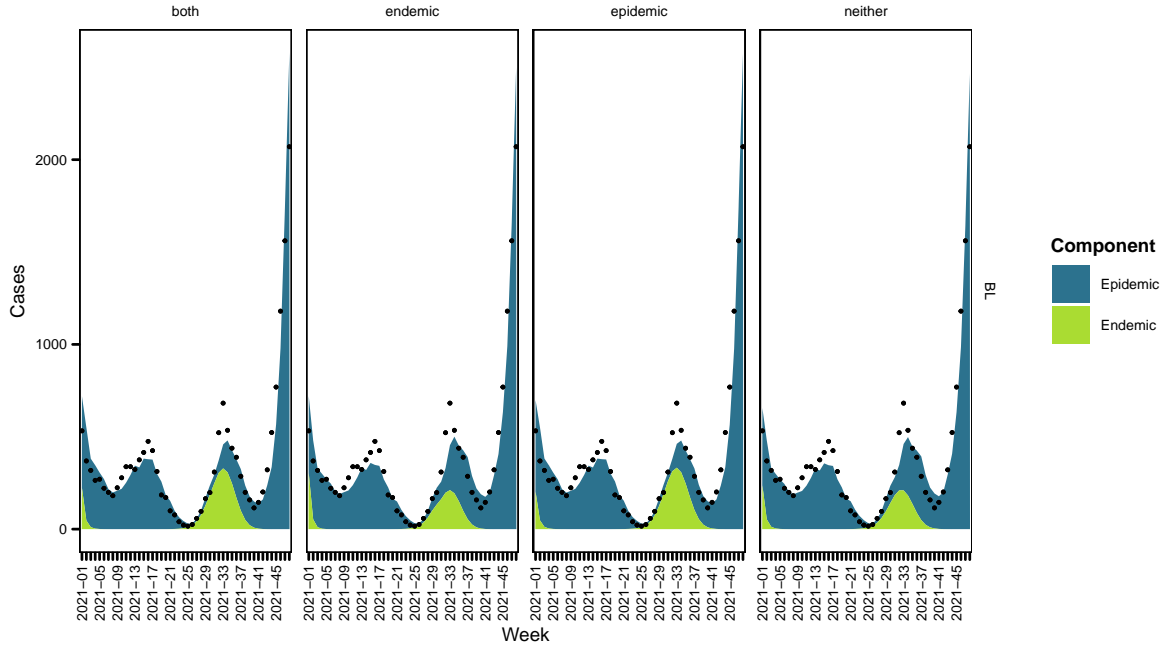

43

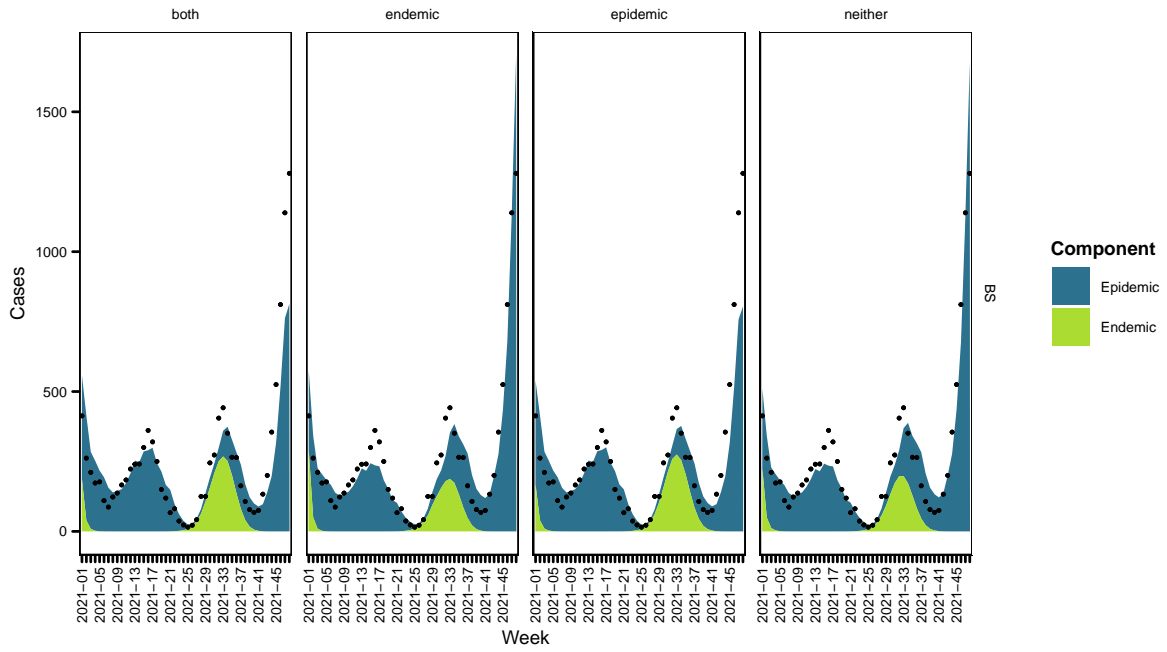

44

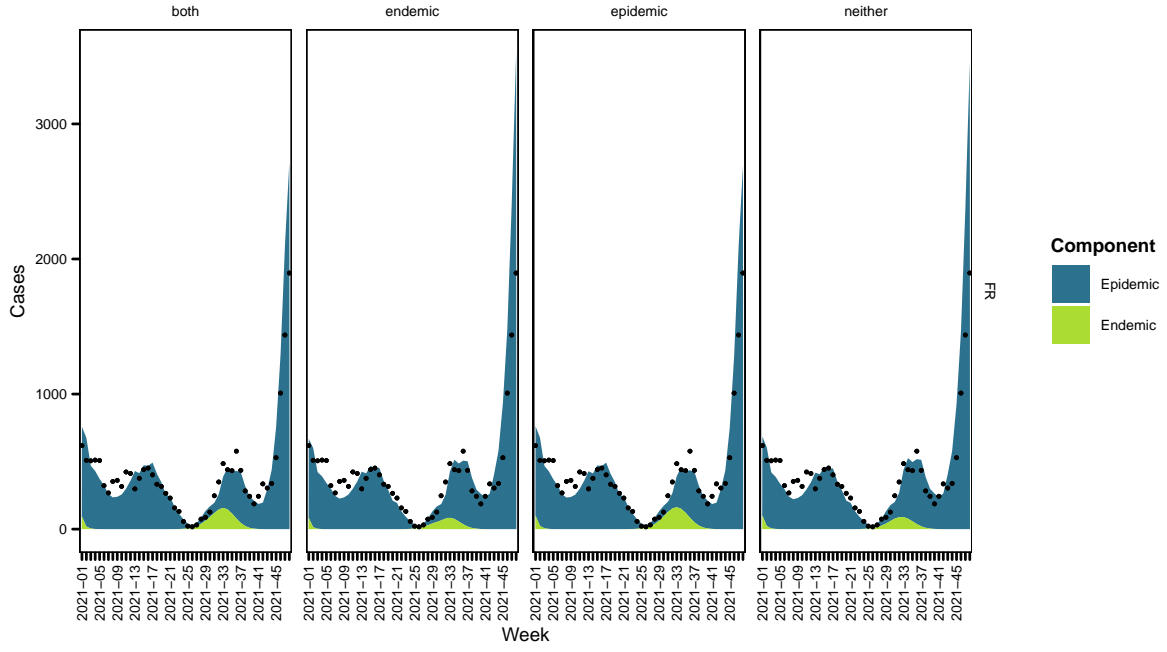

45

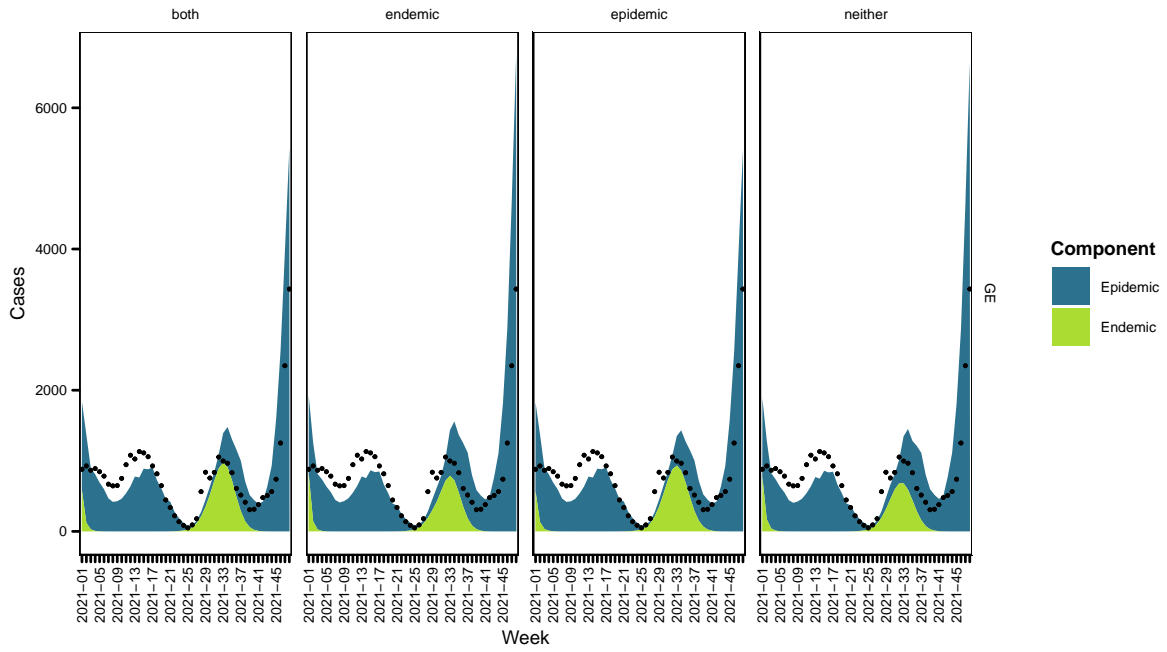

46

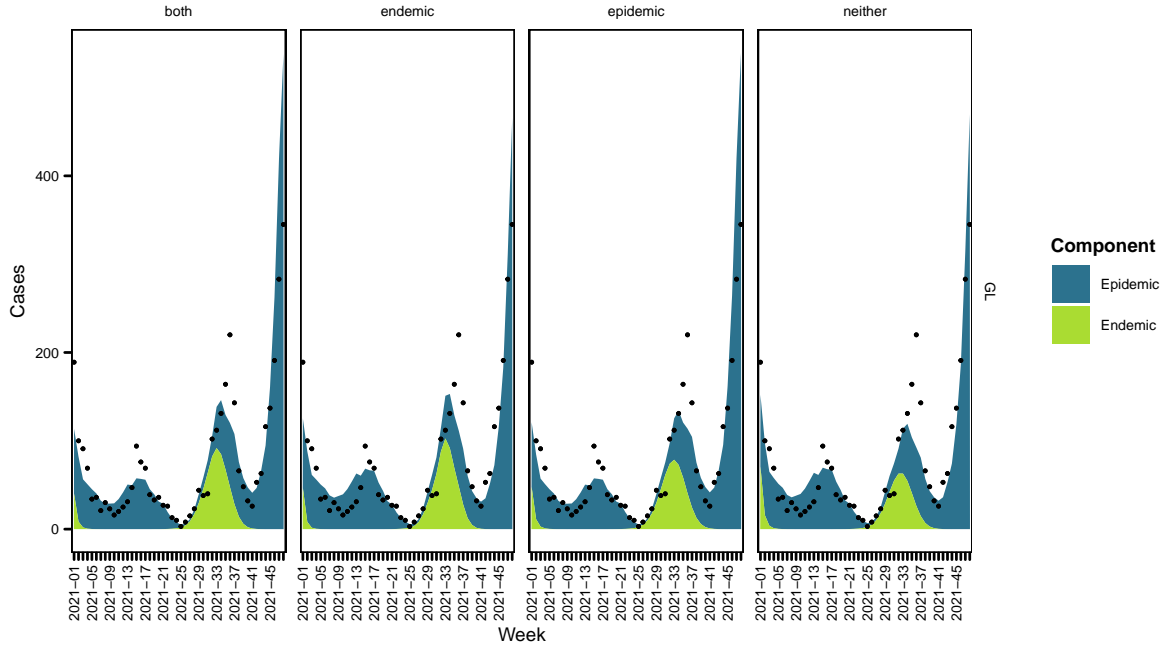

47

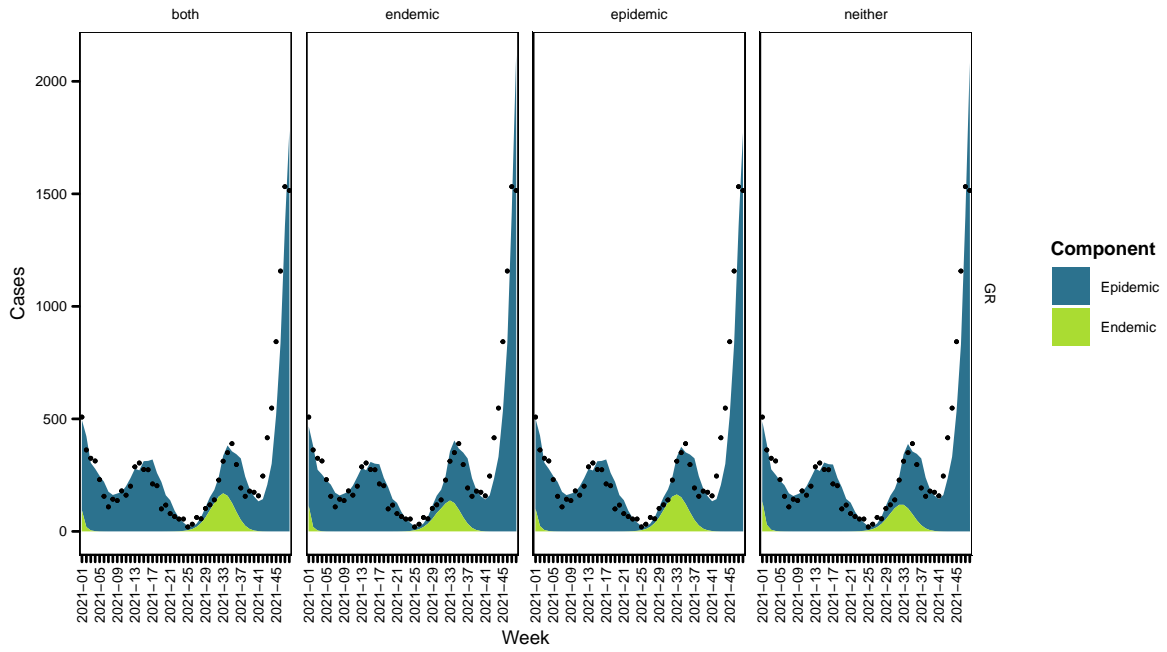

48

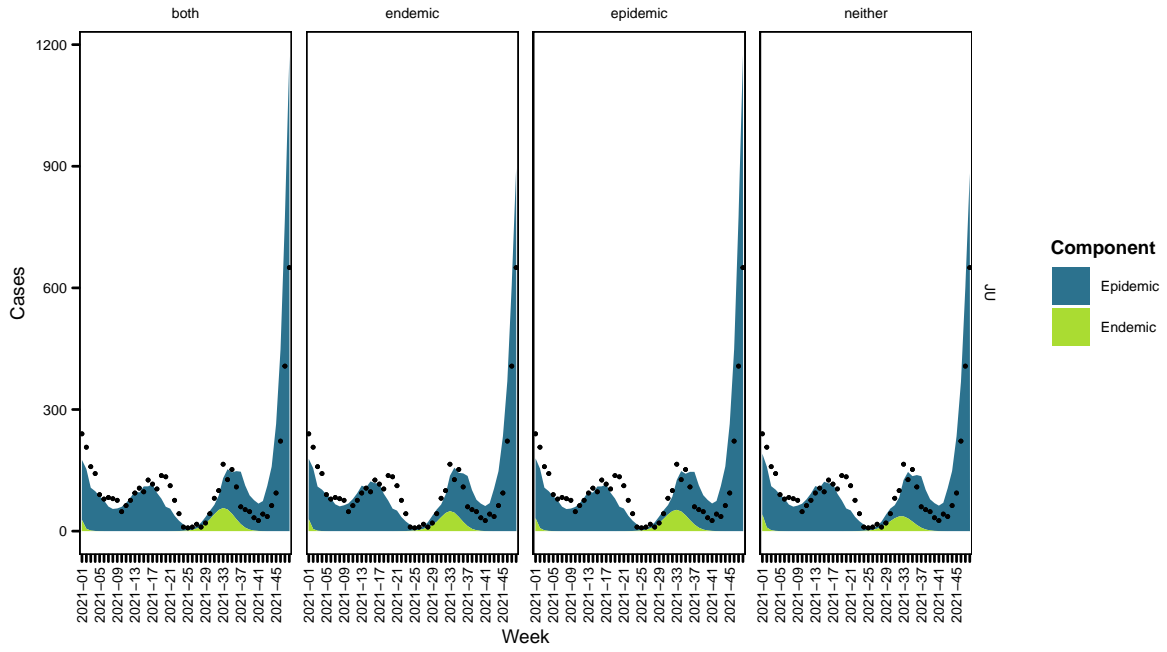

49

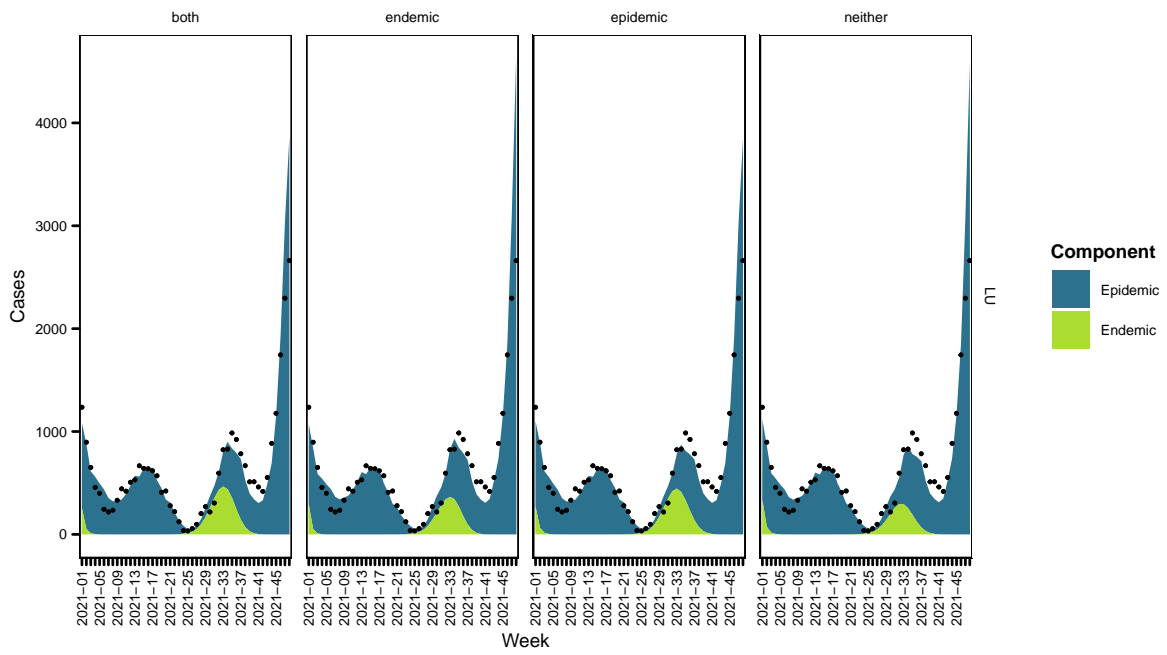

50

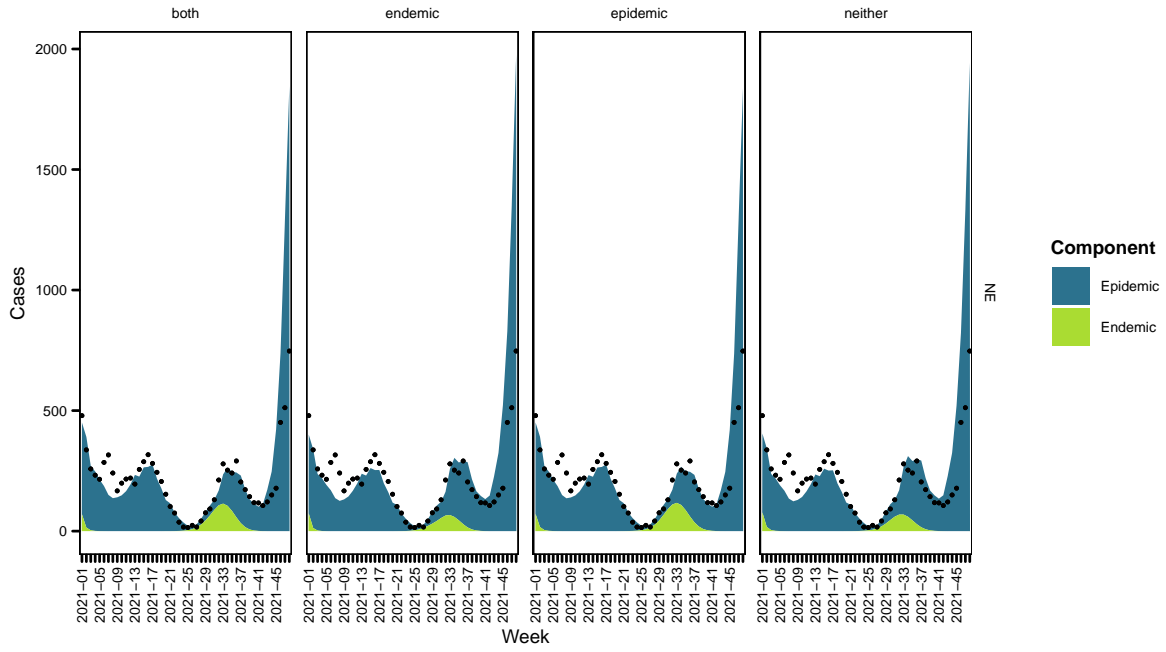

51

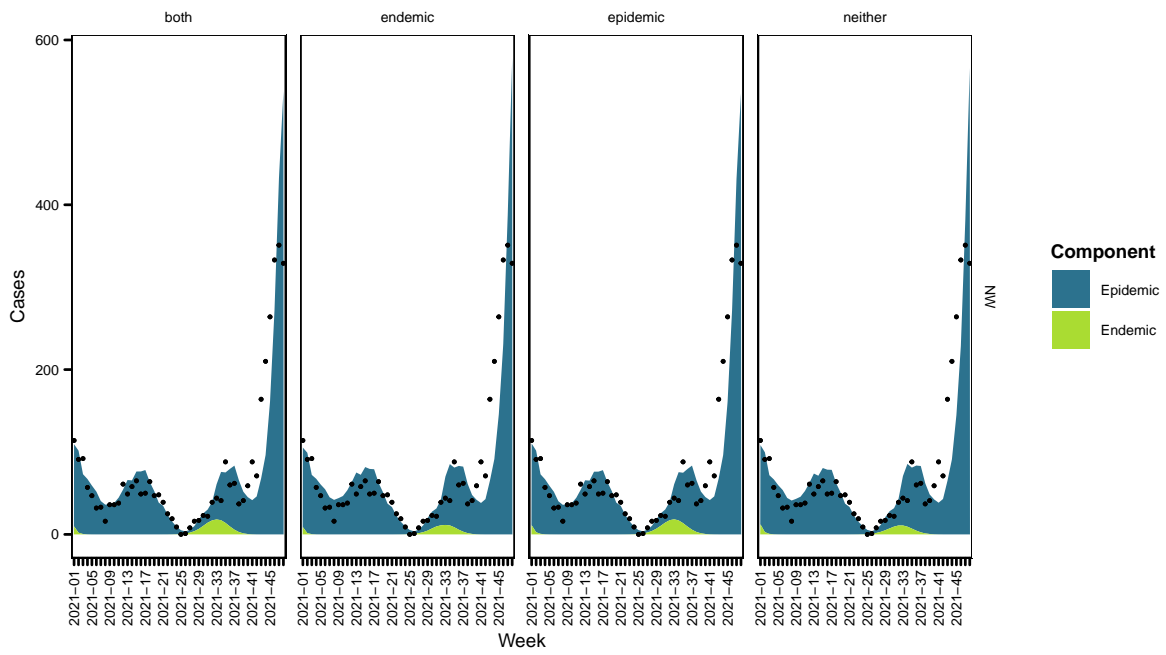

52

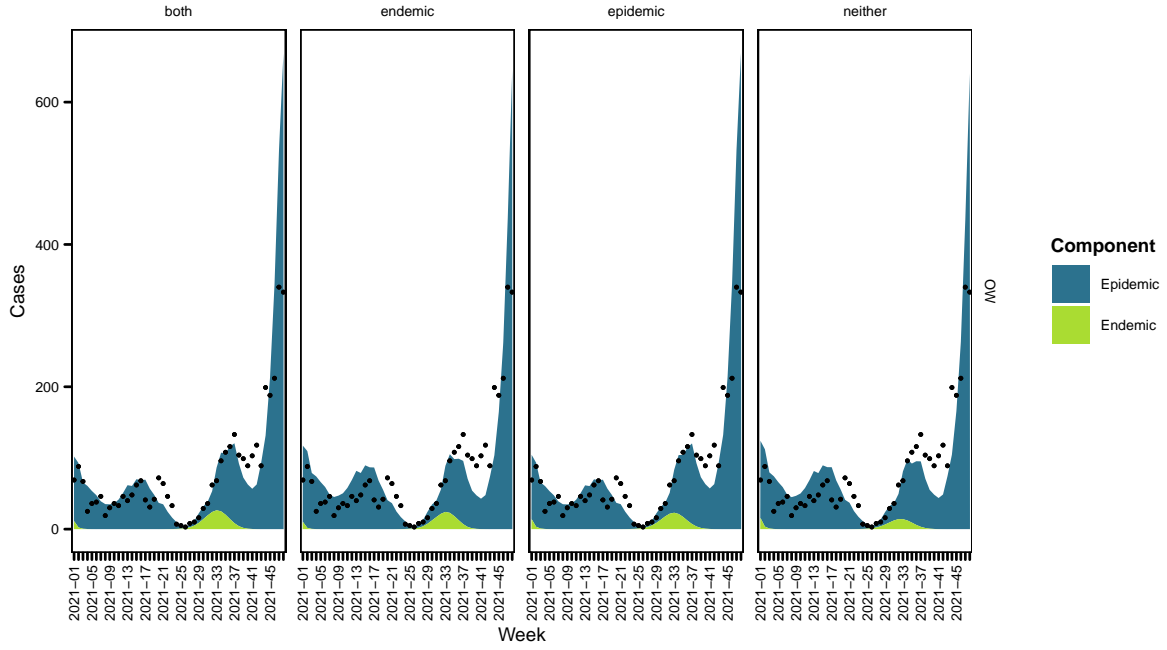

53

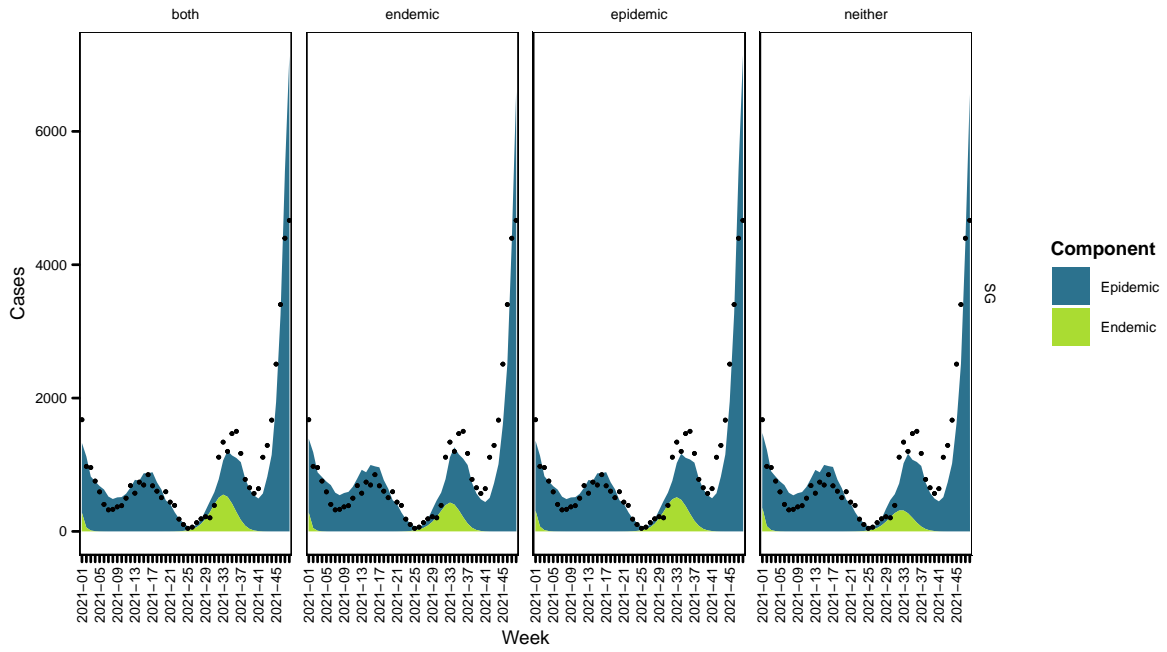

54

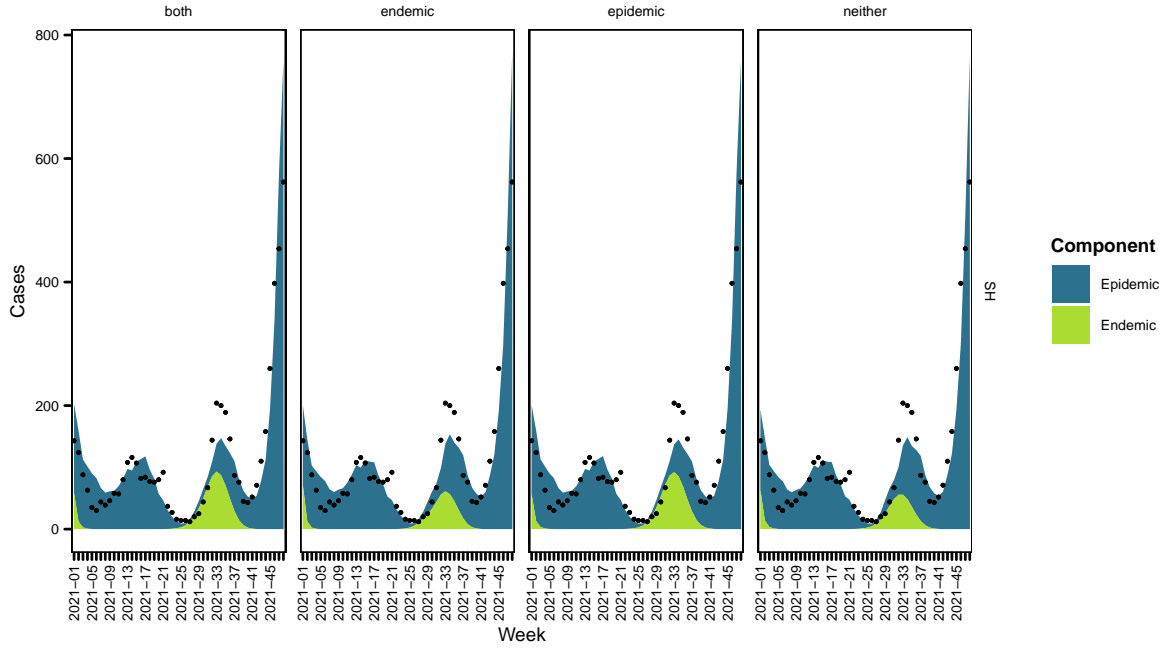

55

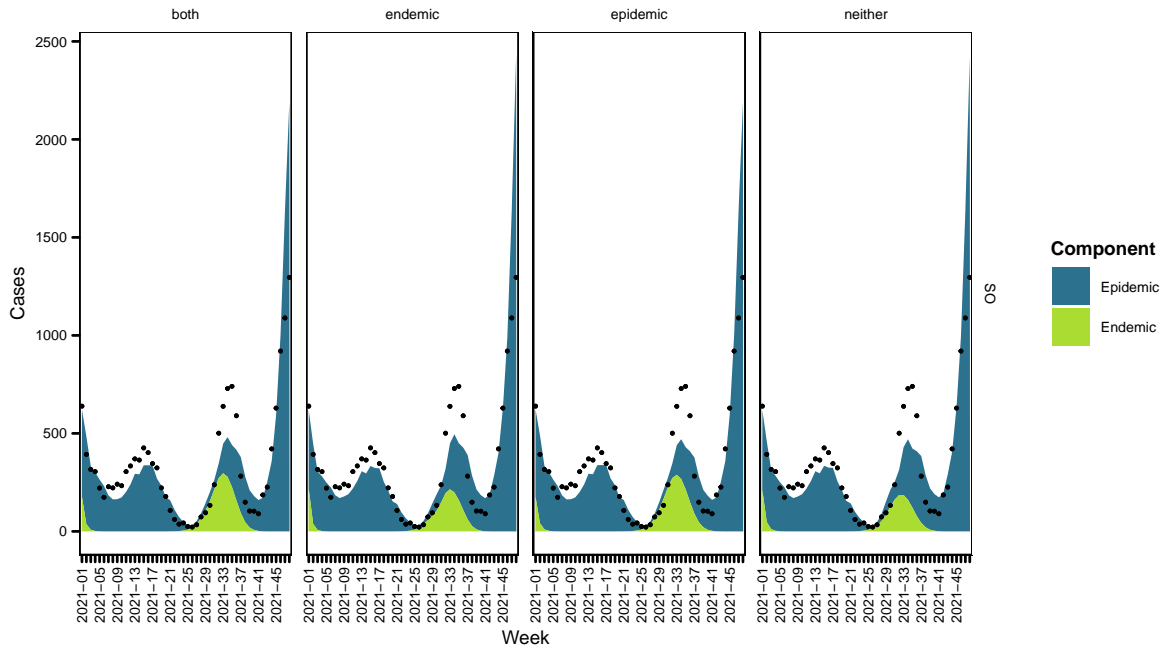

56



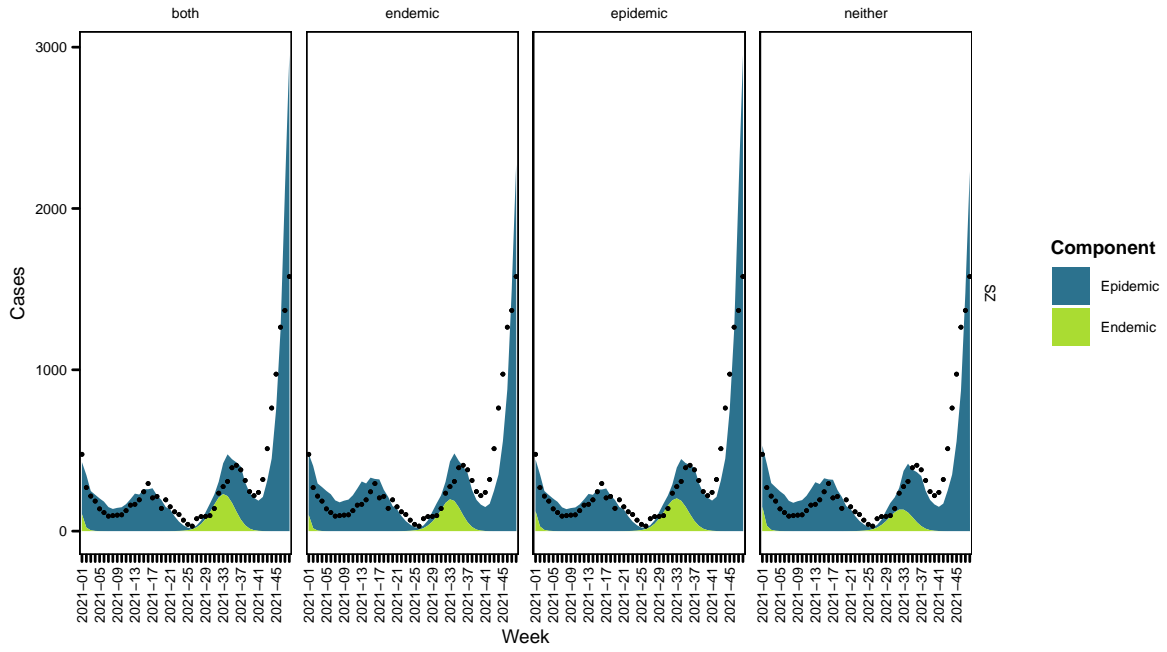

57

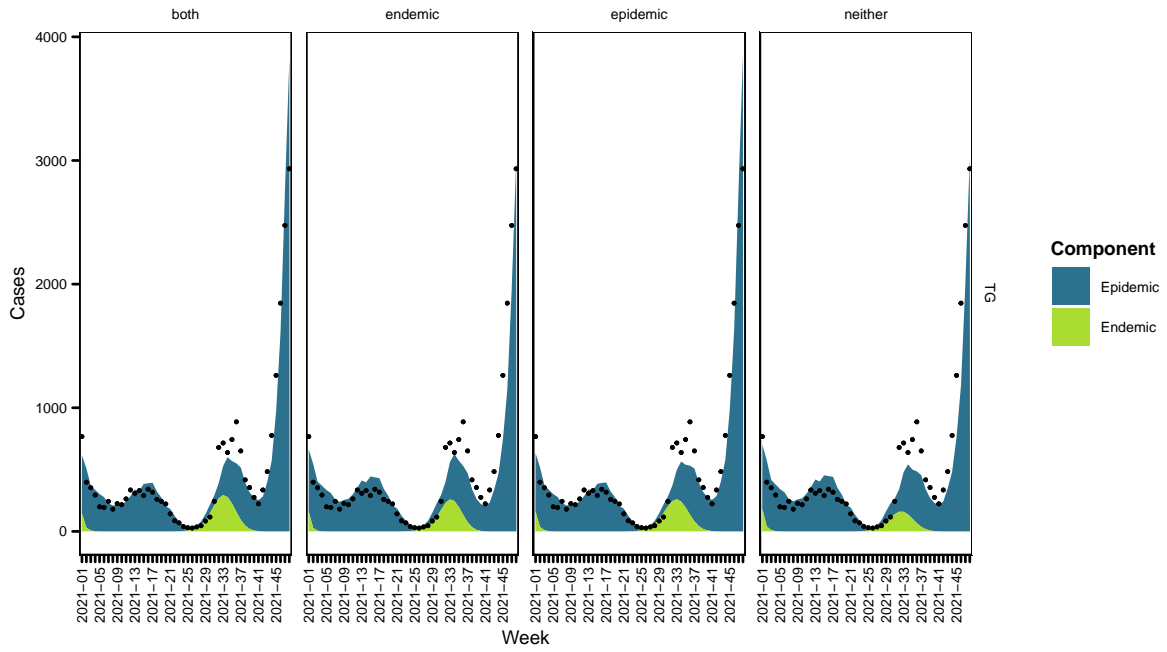

58

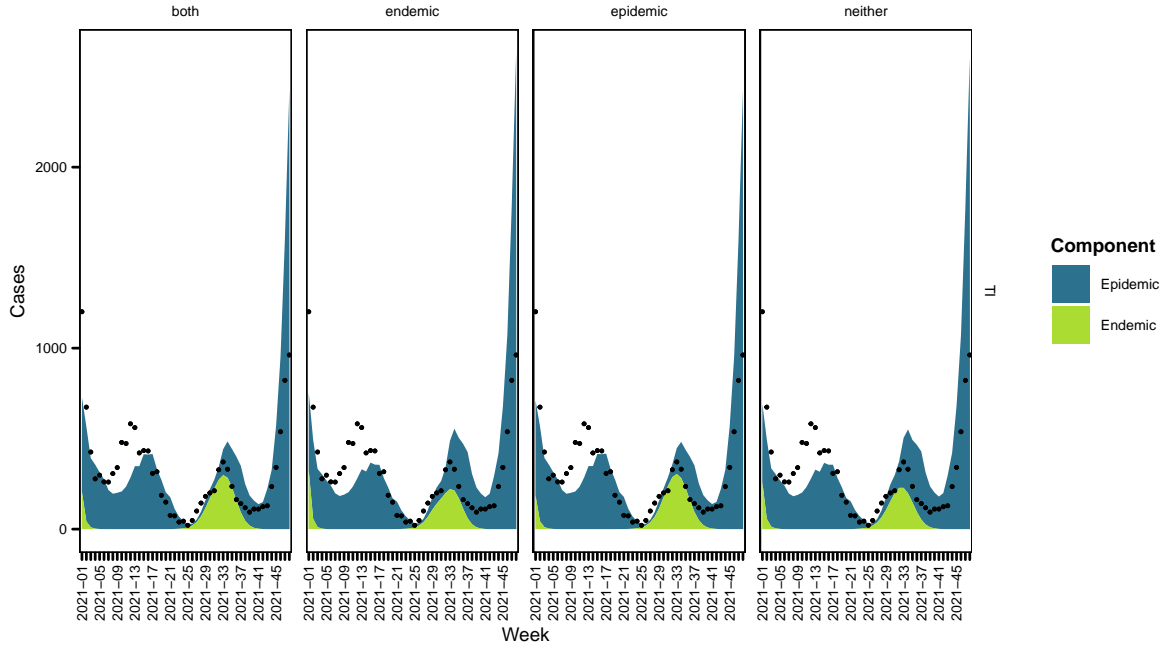

59

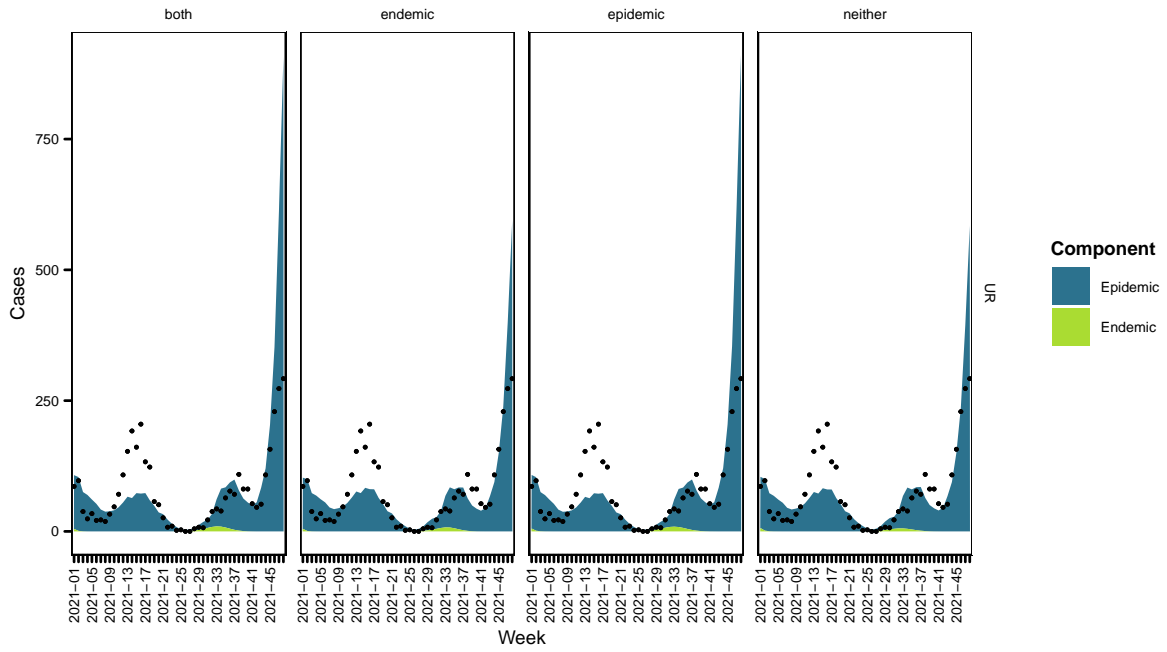

60

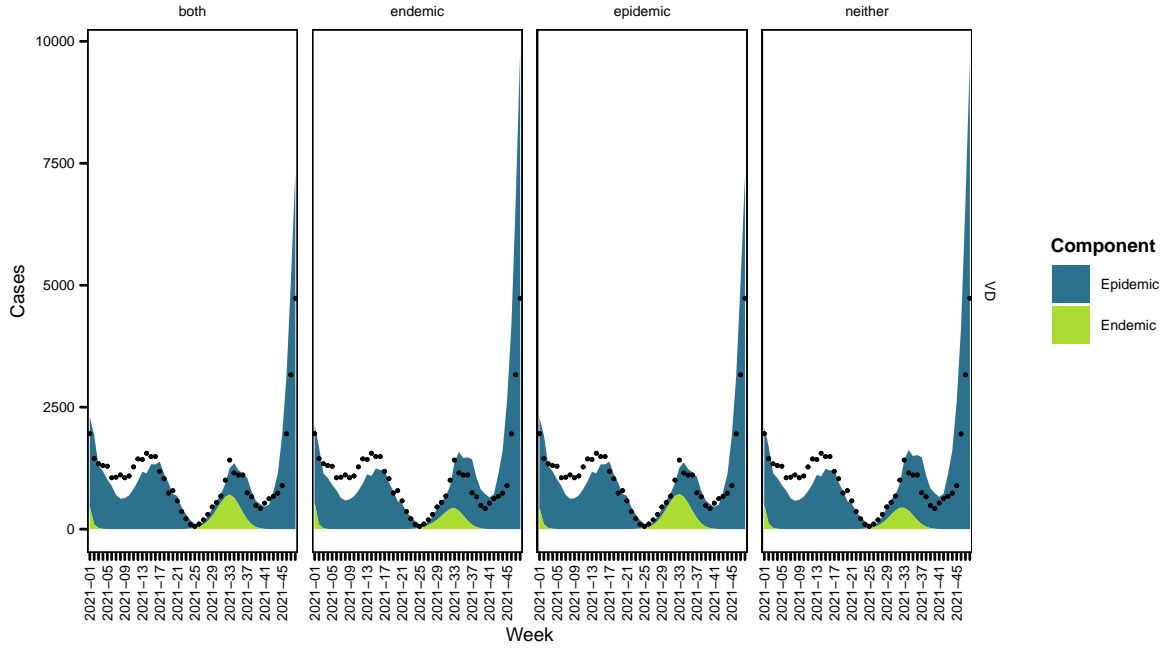

61

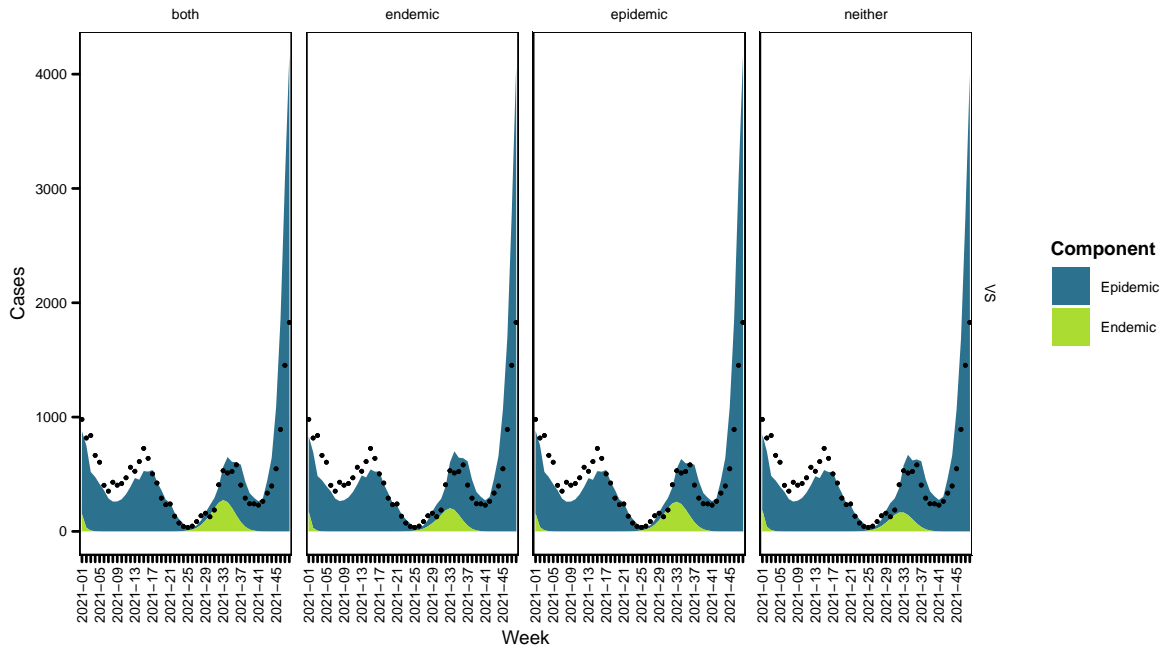

62

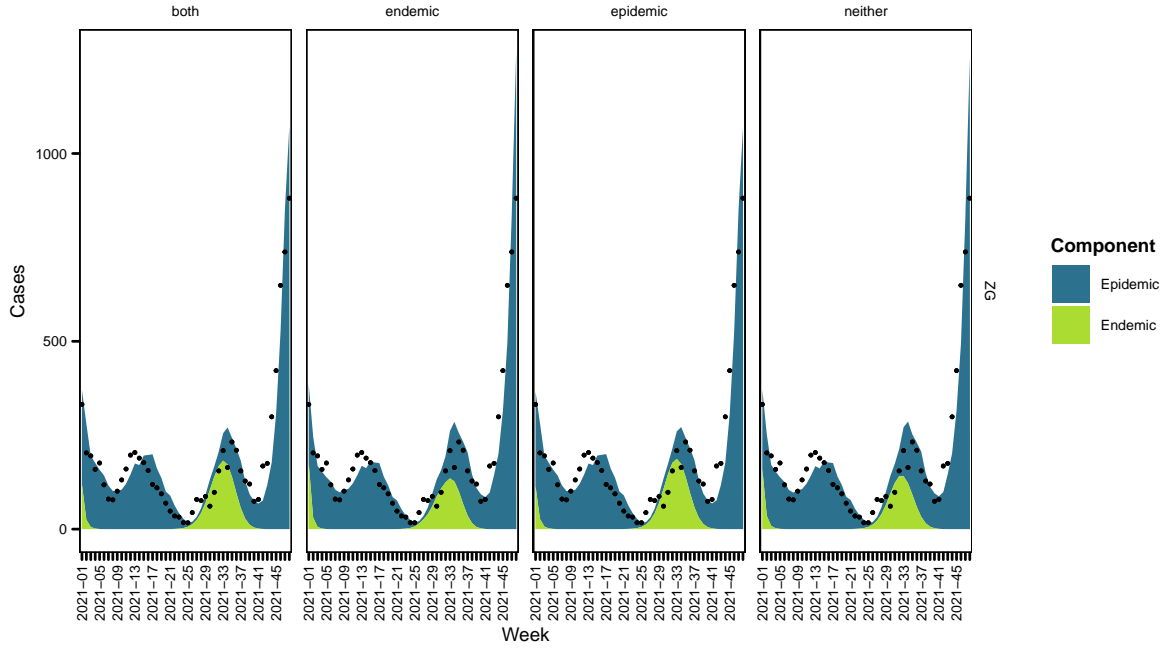

63

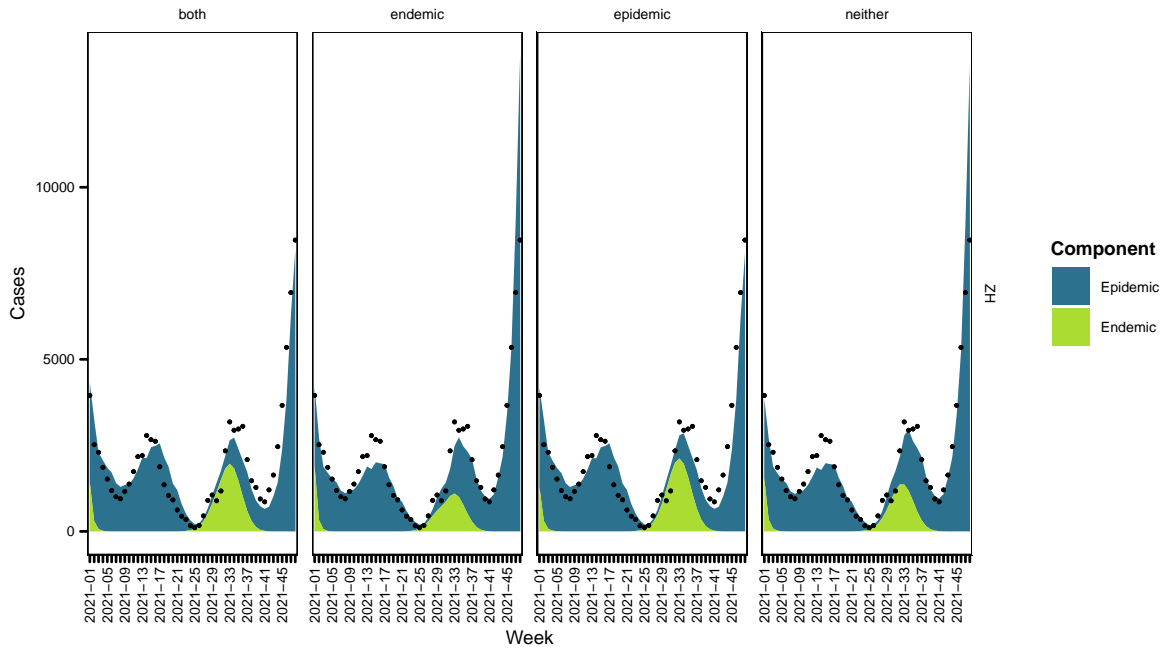

64

65 **2.2 Time-varying regional transmission weights**

66 Now the model contains the time-varying transmission weights. A snapshot is shown  
 67 below

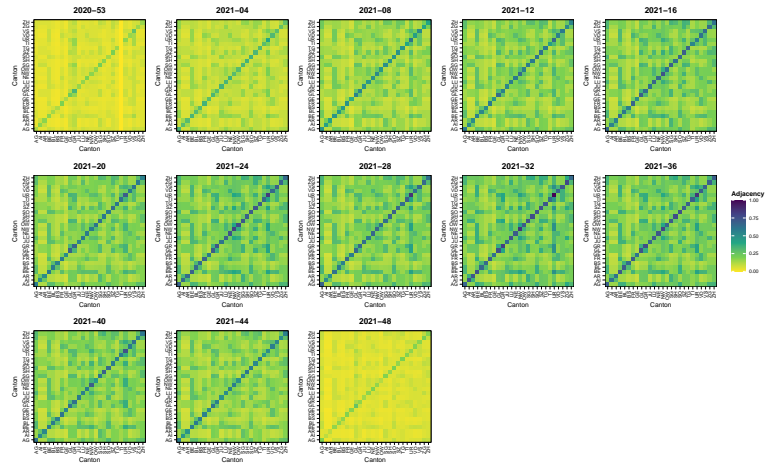

68

|                                 | neither           | endemic            | epidemic          | both               |
|---------------------------------|-------------------|--------------------|-------------------|--------------------|
| $\gamma_{\sin(2\pi t/52)}^\phi$ | 0.674 (SE 0.04)   | 0.687 (SE 0.039)   | 0.247 (SE 0.049)  | 0.255 (SE 0.049)   |
| $\gamma_{\cos(2\pi t/52)}^\phi$ | 0.708 (SE 0.023)  | 0.722 (SE 0.023)   | 0.818 (SE 0.024)  | 0.821 (SE 0.024)   |
| $\gamma_{\text{gravity}}^\phi$  | 0.779 (SE 0.033)  | 0.782 (SE 0.033)   | 0.838 (SE 0.029)  | 0.838 (SE 0.029)   |
| $\gamma_{\text{time}}^\phi$     | 0.036 (SE 0.002)  | 0.036 (SE 0.002)   | 0.085 (SE 0.004)  | 0.084 (SE 0.004)   |
| $\alpha_{\text{region}}^\phi$   | 0.798 (SE 0.131)  | 0.802 (SE 0.13)    | 2.118 (SE 0.15)   | 2.099 (SE 0.15)    |
| $\gamma_{\sin(2\pi t/52)}^\nu$  | -9.588 (SE 0.564) | -11.467 (SE 0.832) | -9.393 (SE 0.425) | -10.438 (SE 0.669) |
| $\gamma_{\cos(2\pi t/52)}^\nu$  | -3.972 (SE 0.402) | -4.586 (SE 0.45)   | -3.621 (SE 0.281) | -4.004 (SE 0.342)  |
| $\gamma_{\text{time}}^\nu$      | -0.48 (SE 0.036)  | -0.475 (SE 0.035)  | -0.446 (SE 0.026) | -0.448 (SE 0.026)  |
| $\alpha_{\text{region}}^\nu$    | 3.208 (SE 0.397)  | 4.092 (SE 0.471)   | 3.575 (SE 0.294)  | 3.982 (SE 0.358)   |
| $\psi$                          | 0.117 (SE 0.005)  | 0.115 (SE 0.005)   | 0.101 (SE 0.005)  | 0.101 (SE 0.005)   |
| $\beta(\nu)$                    |                   | 3.312 (SE 1.035)   |                   | 1.739 (SE 0.846)   |
| $\beta(\phi)$                   |                   |                    | 2.688 (SE 0.201)  | 2.642 (SE 0.2)     |

69

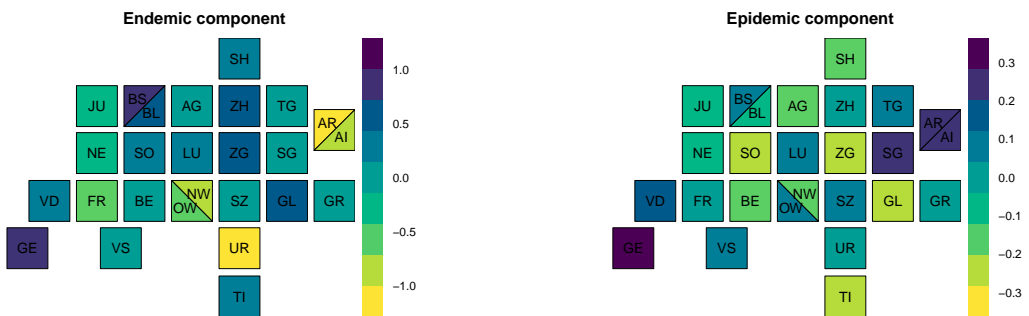

70

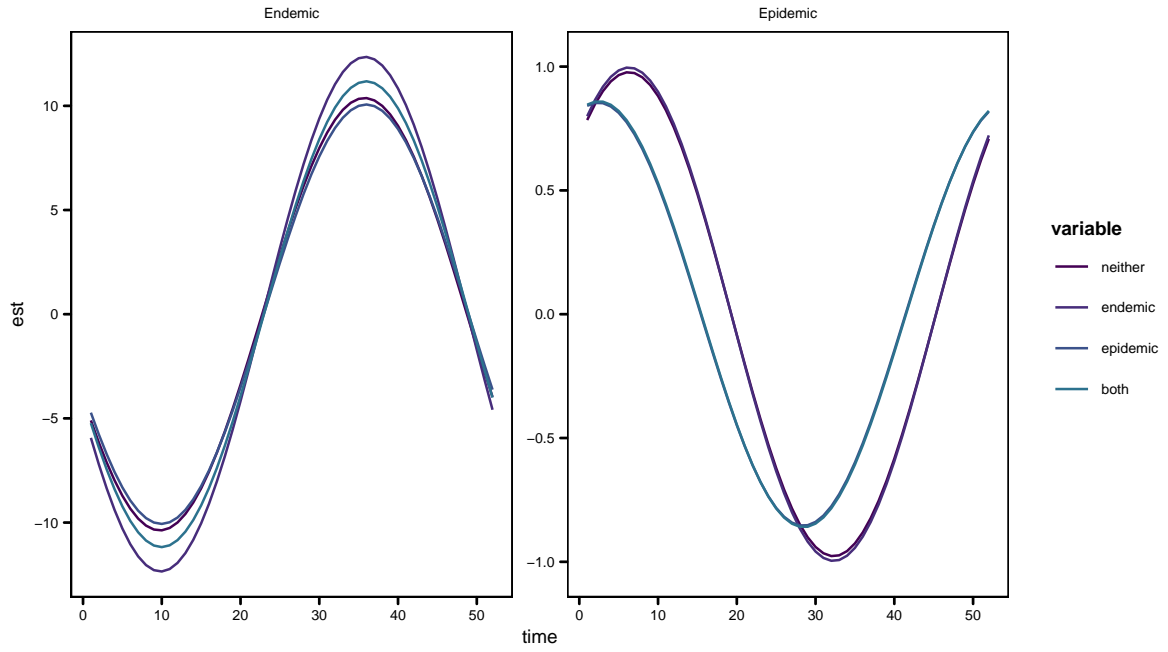

71

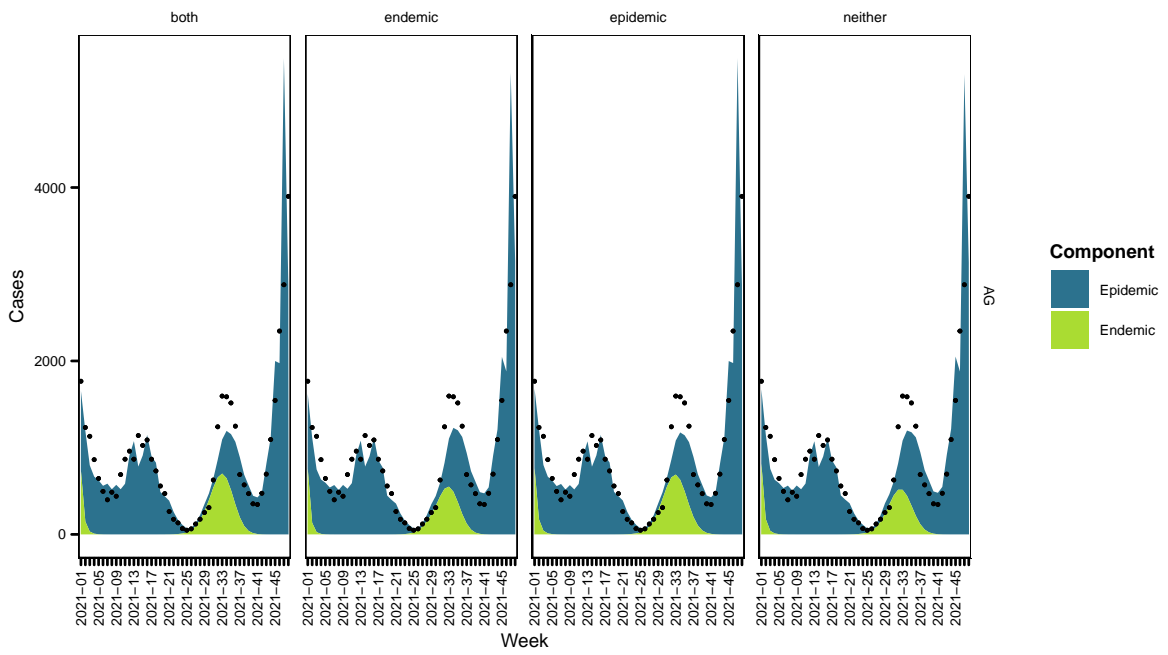

72

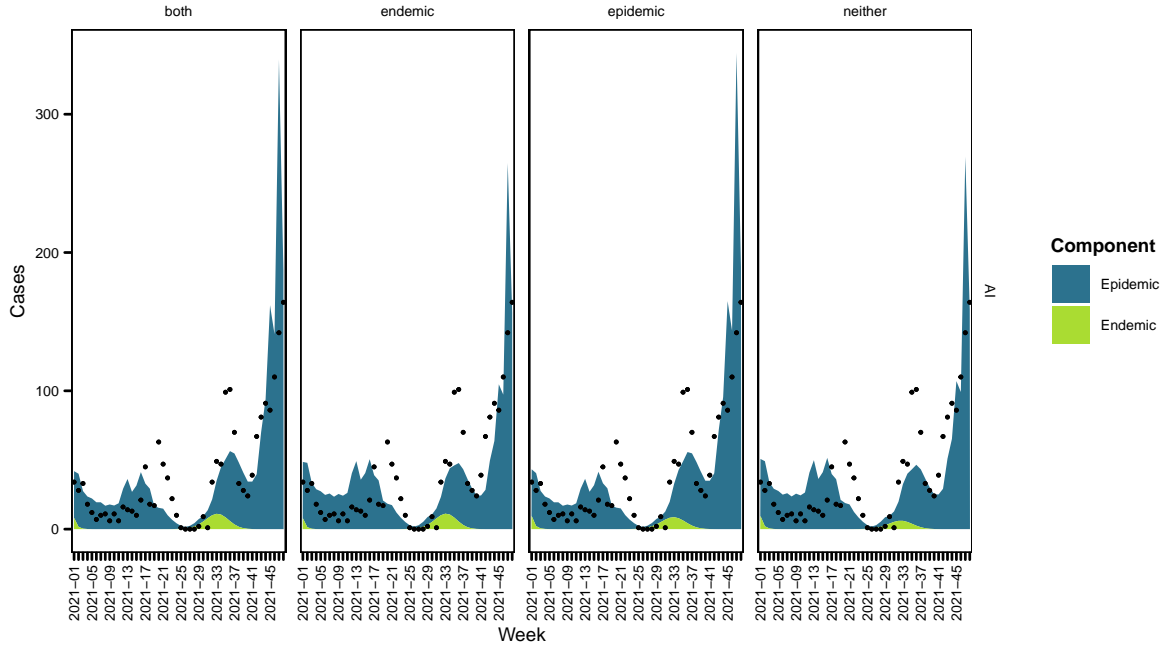

73

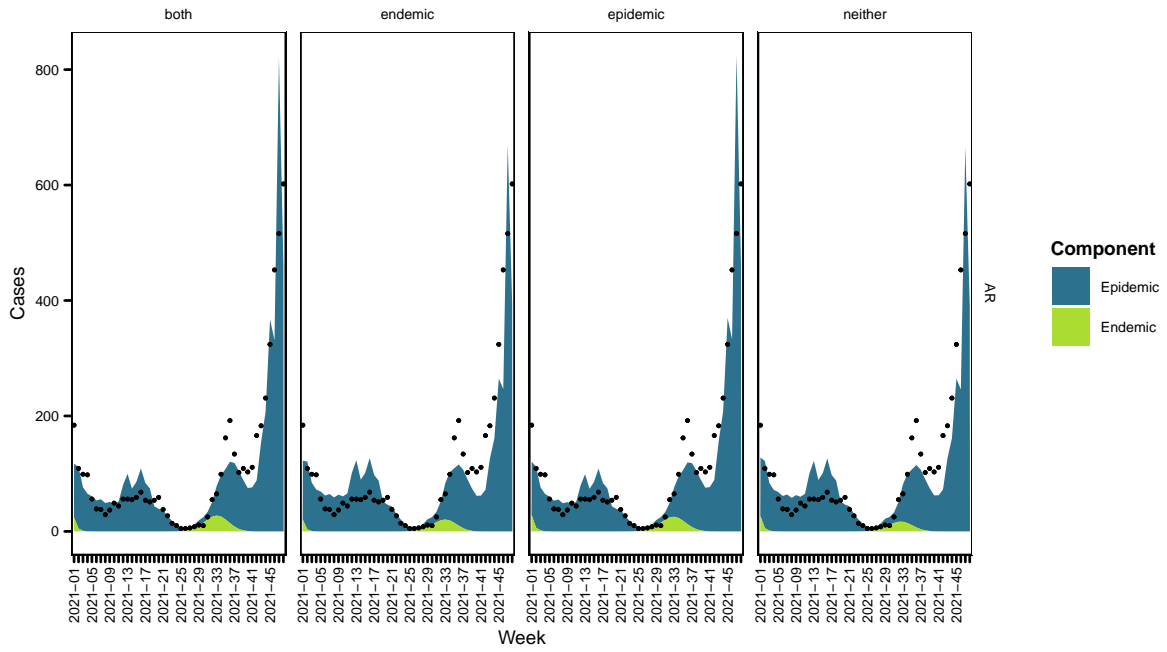

74

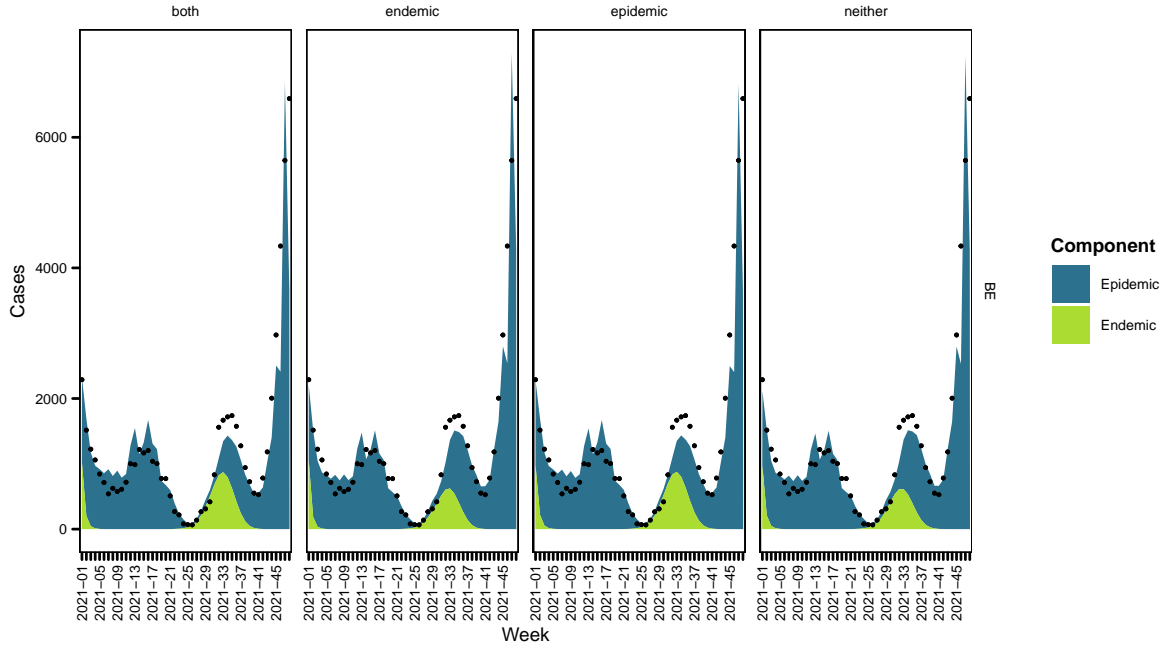

75

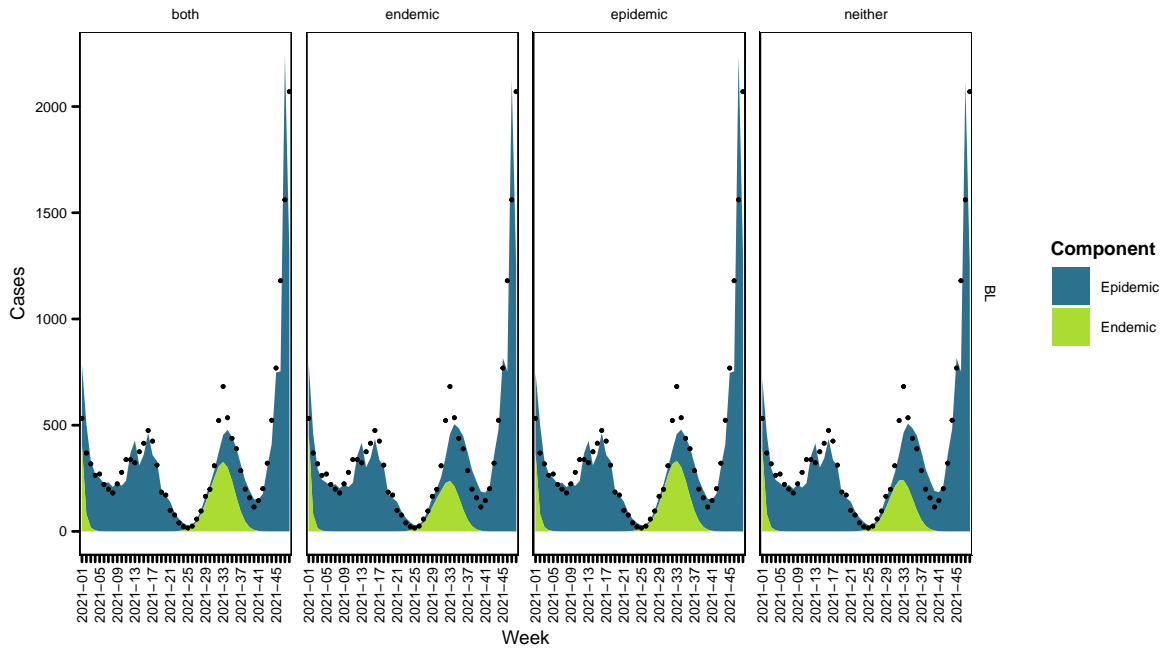

76



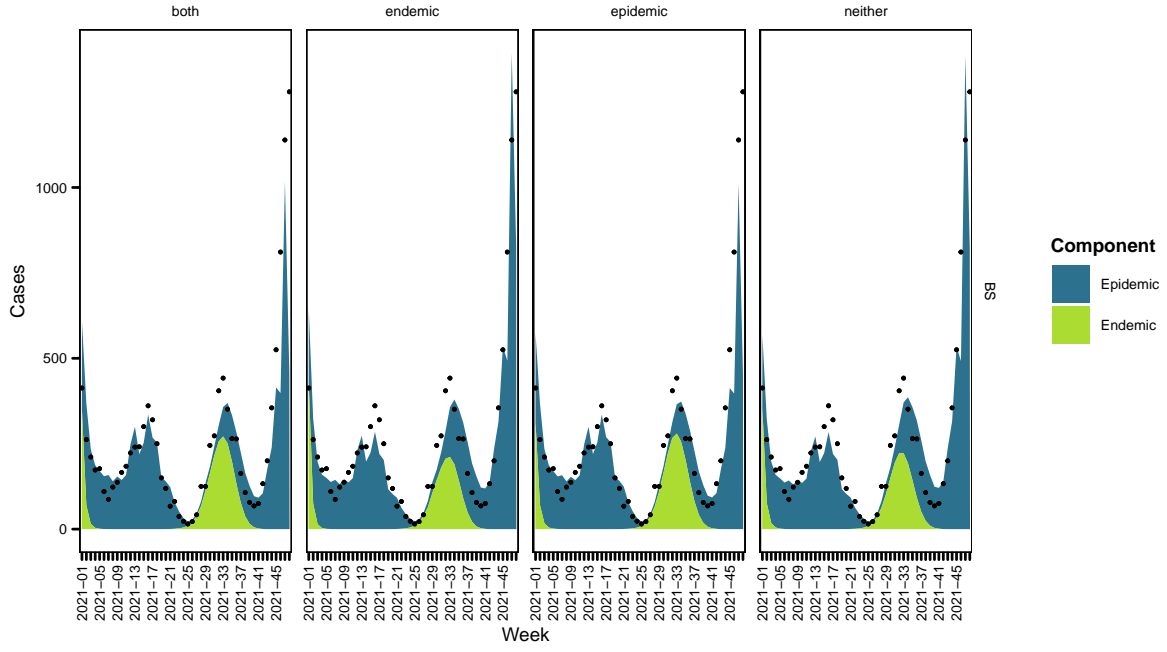

77

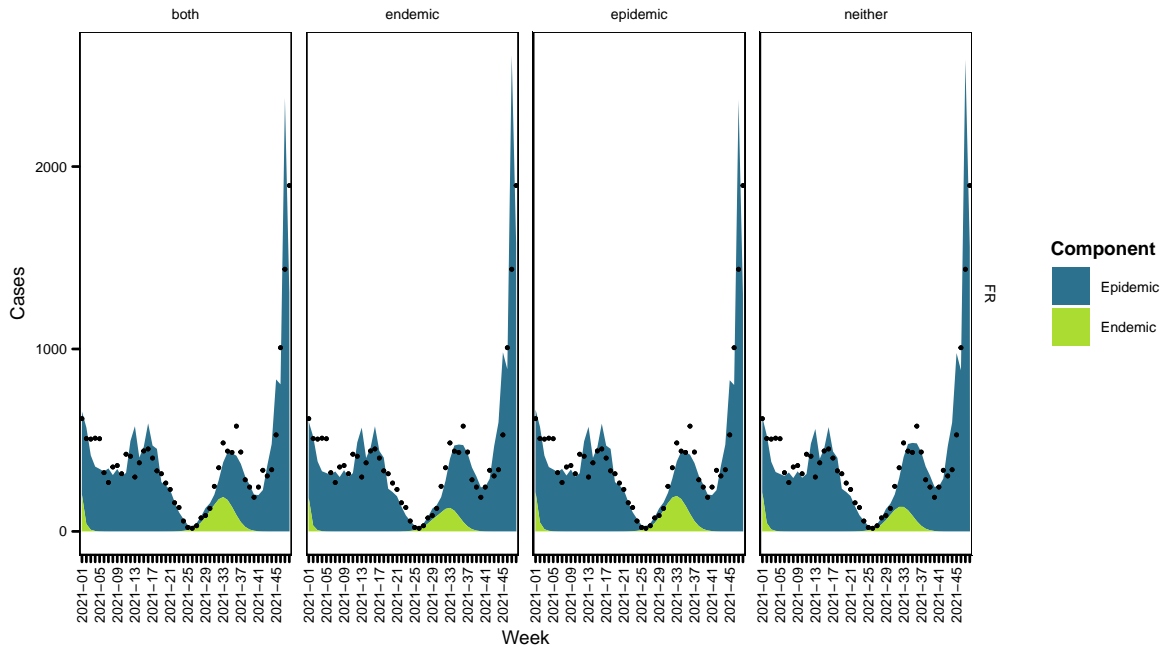

78

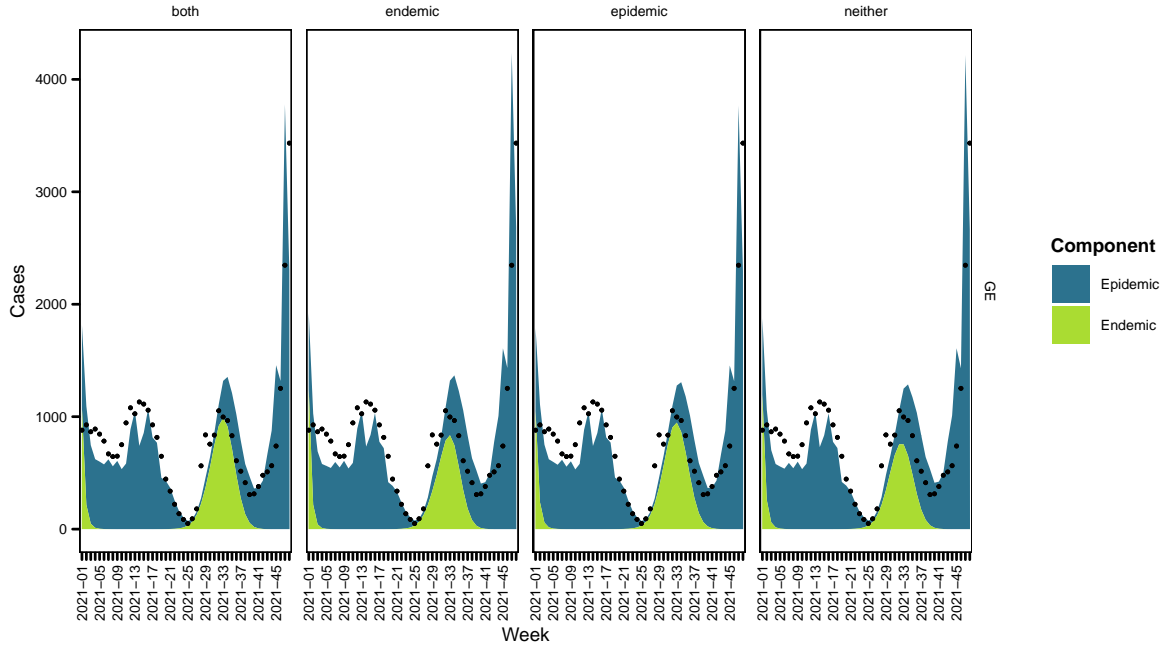

79

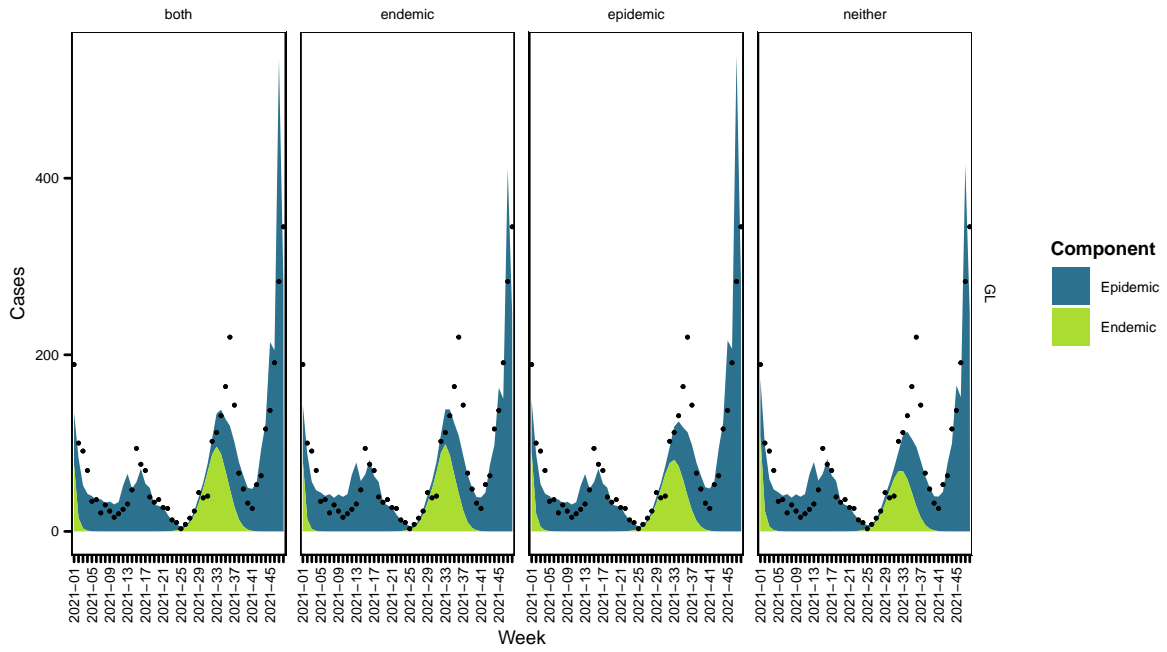

80

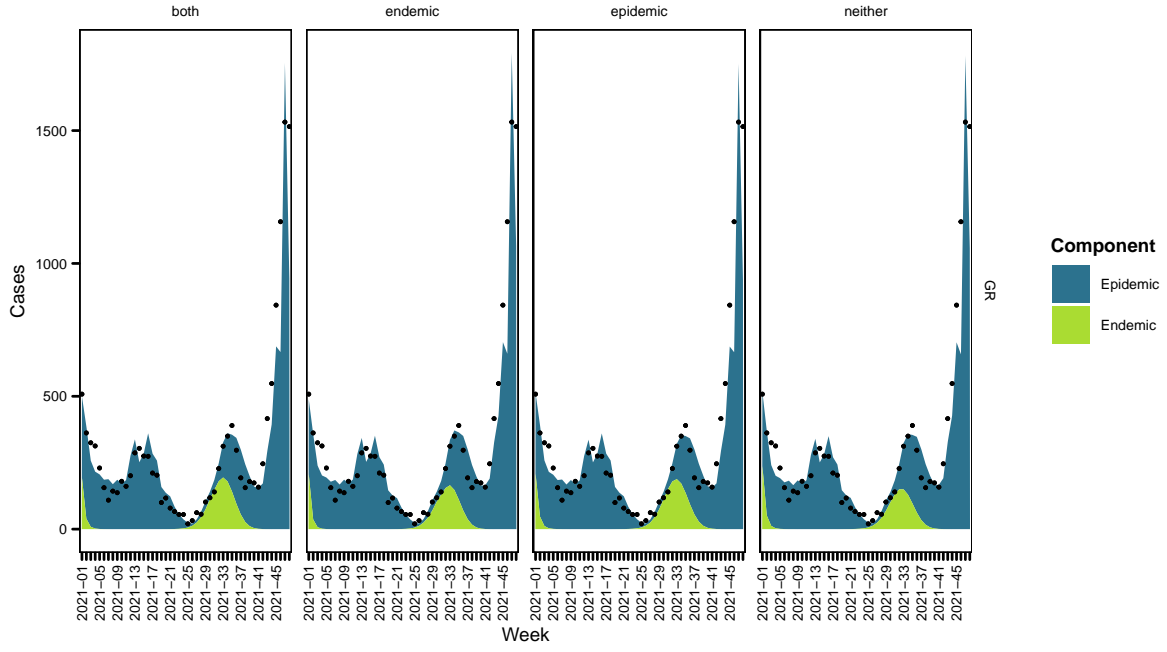

81

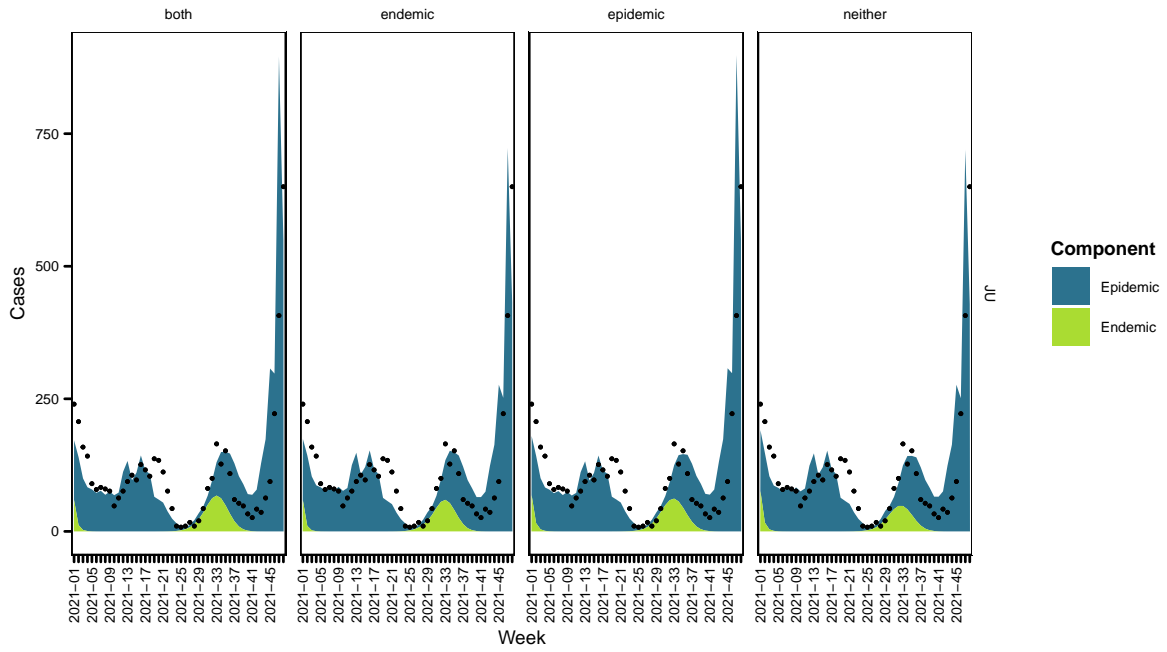

82

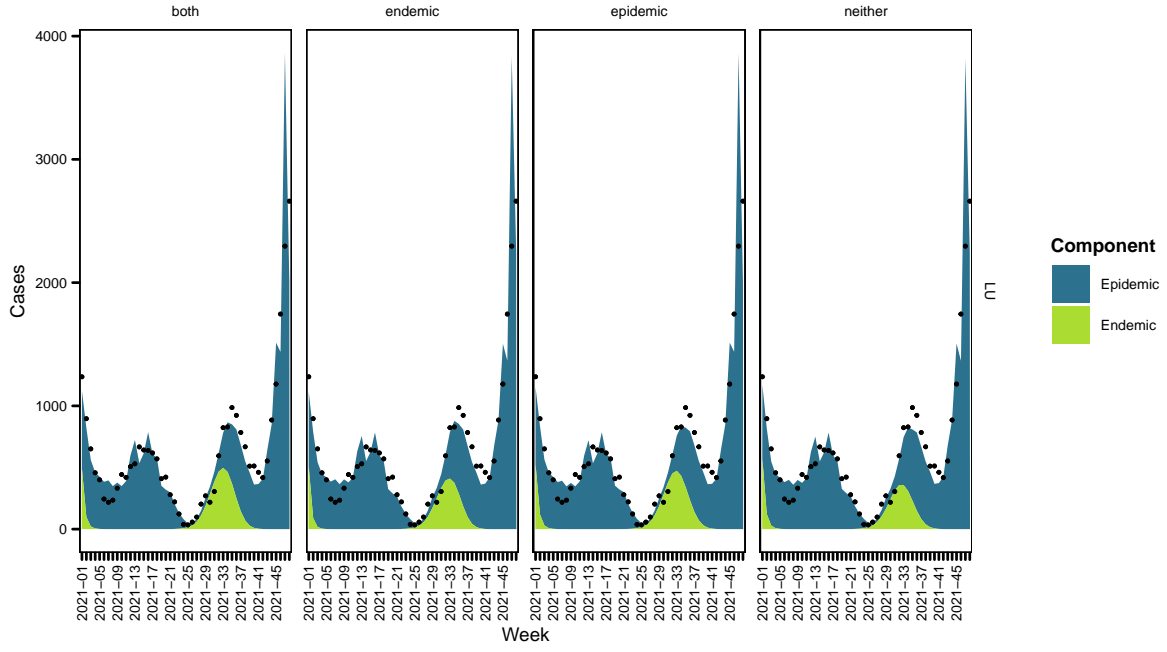

83

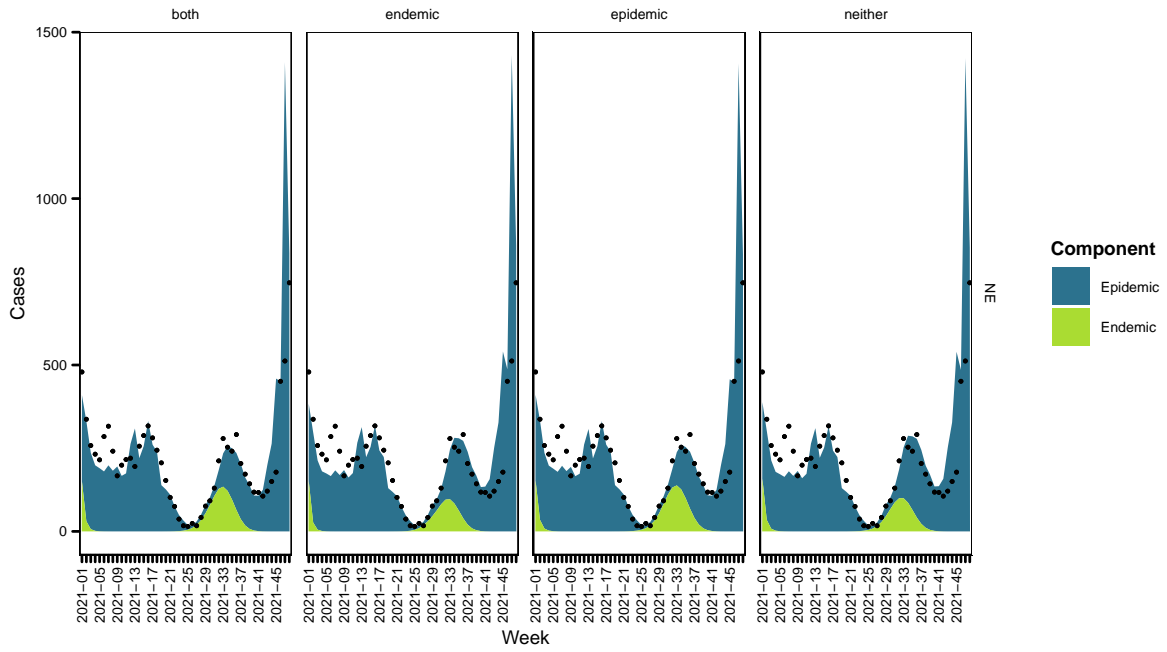

84

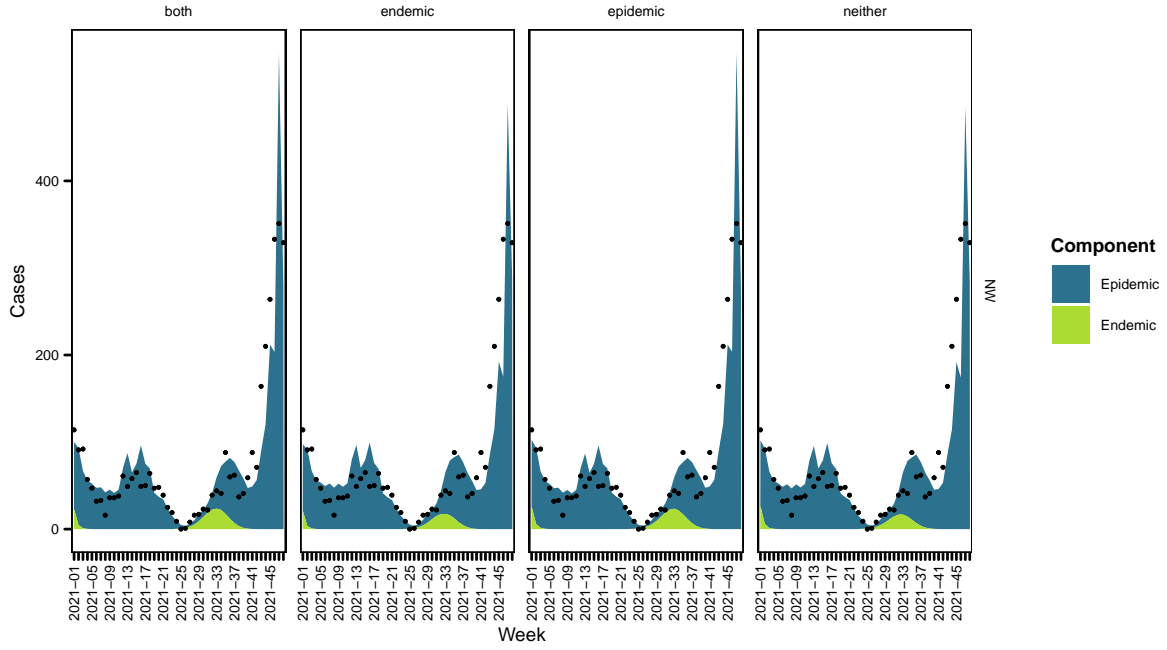

85

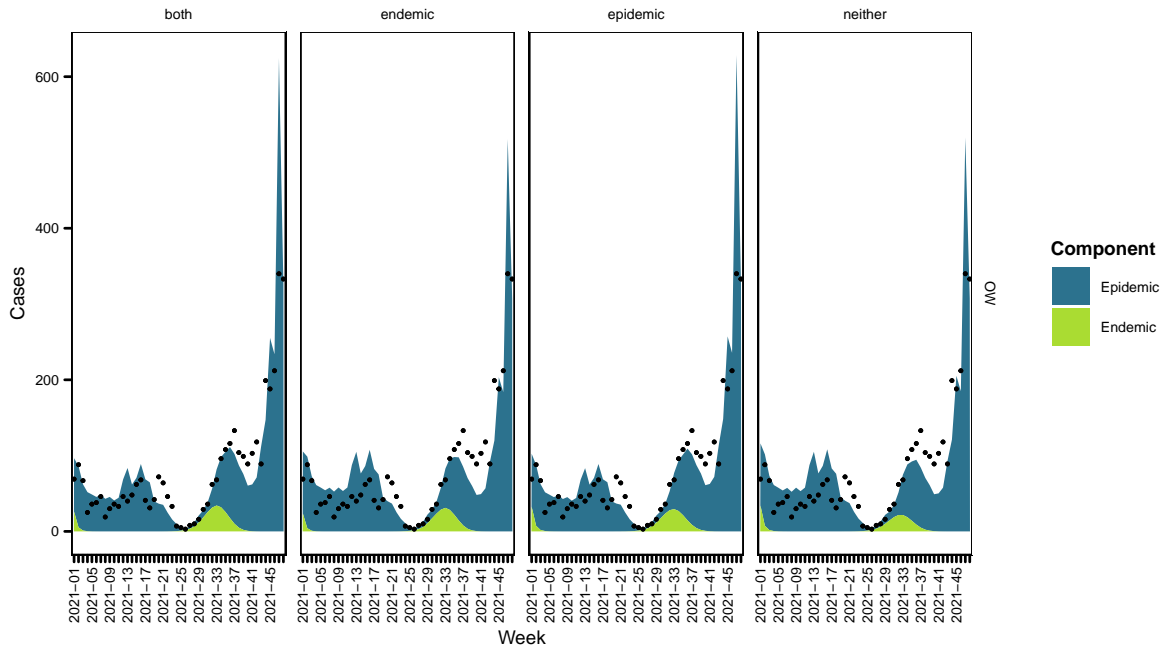

86

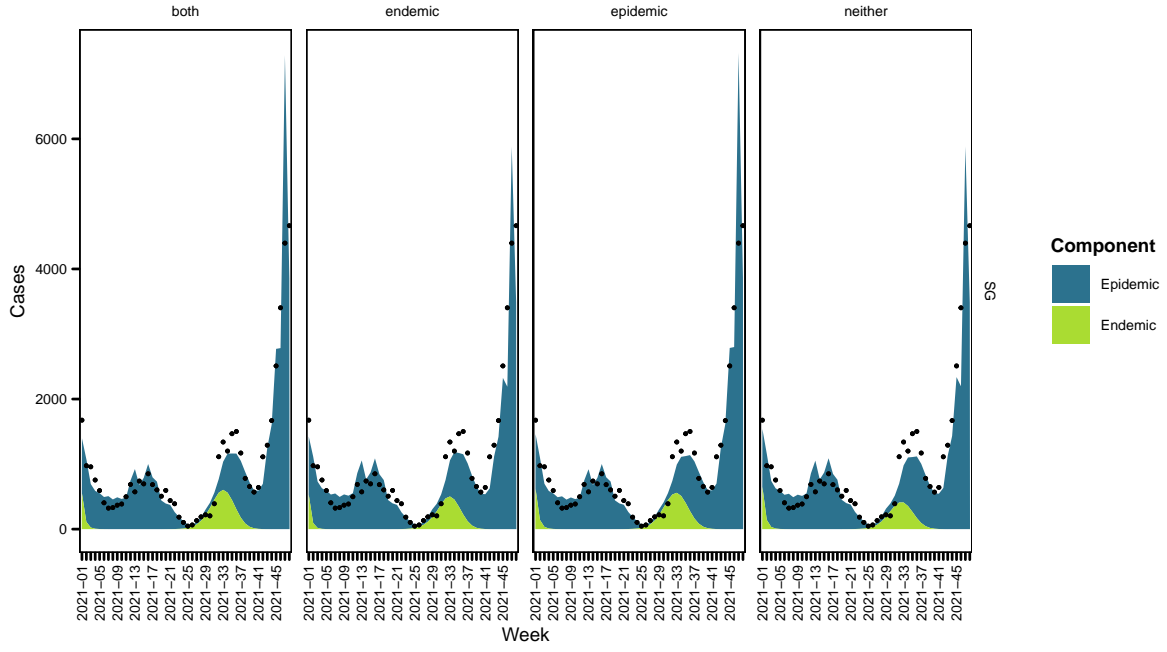

87

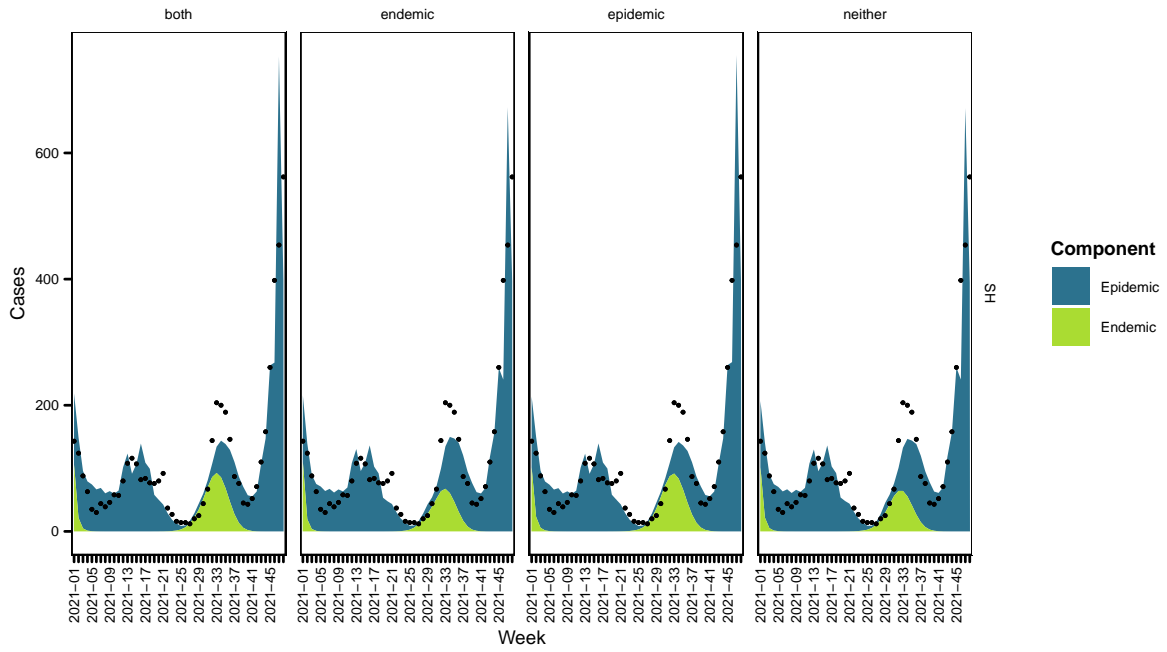

88

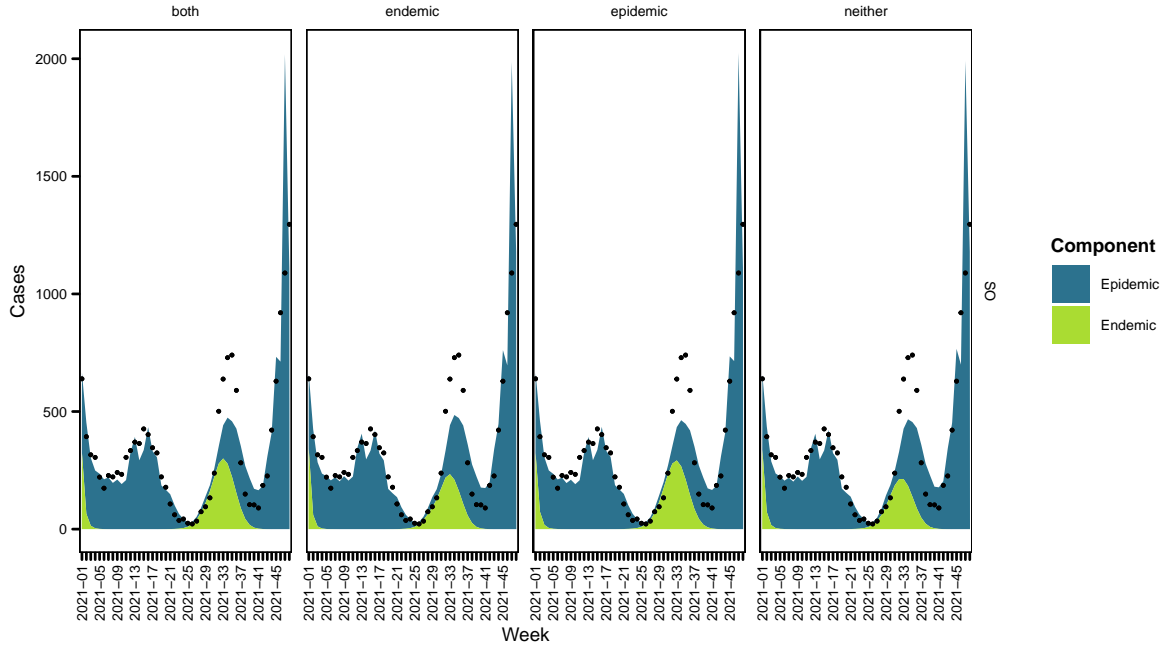

89

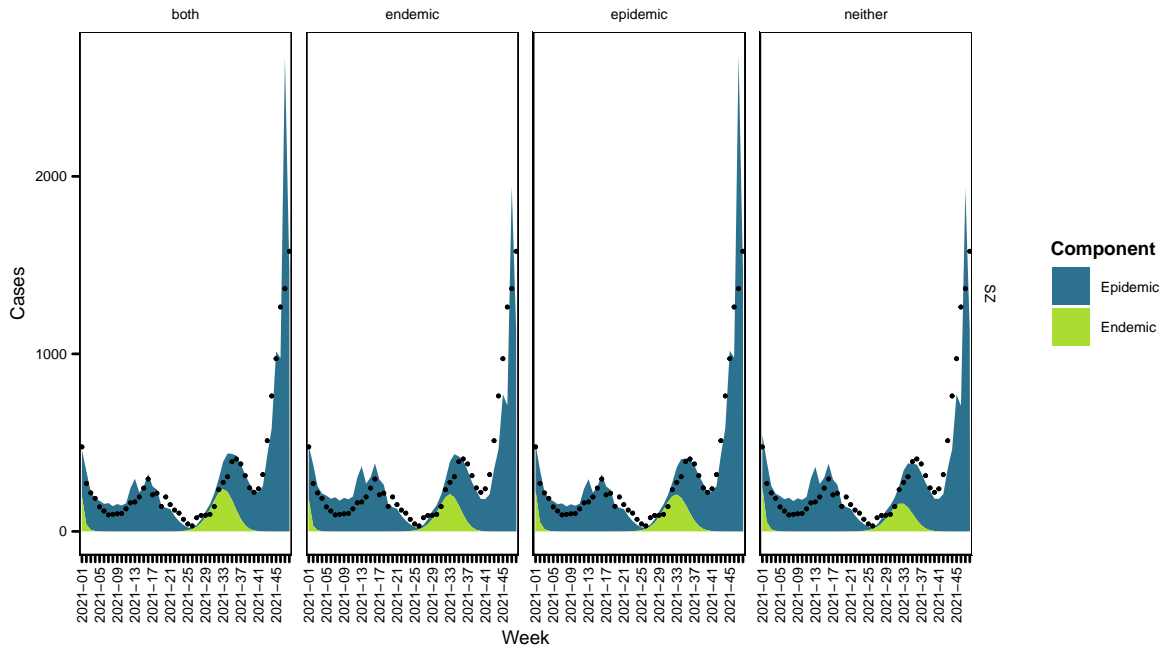

90

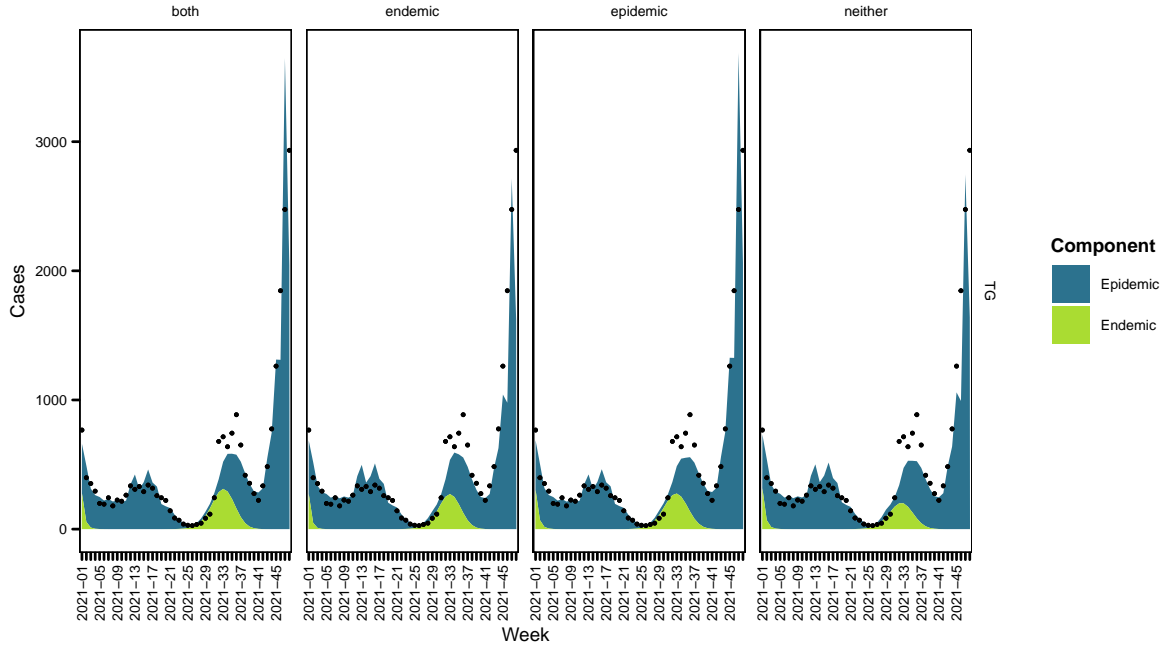

91

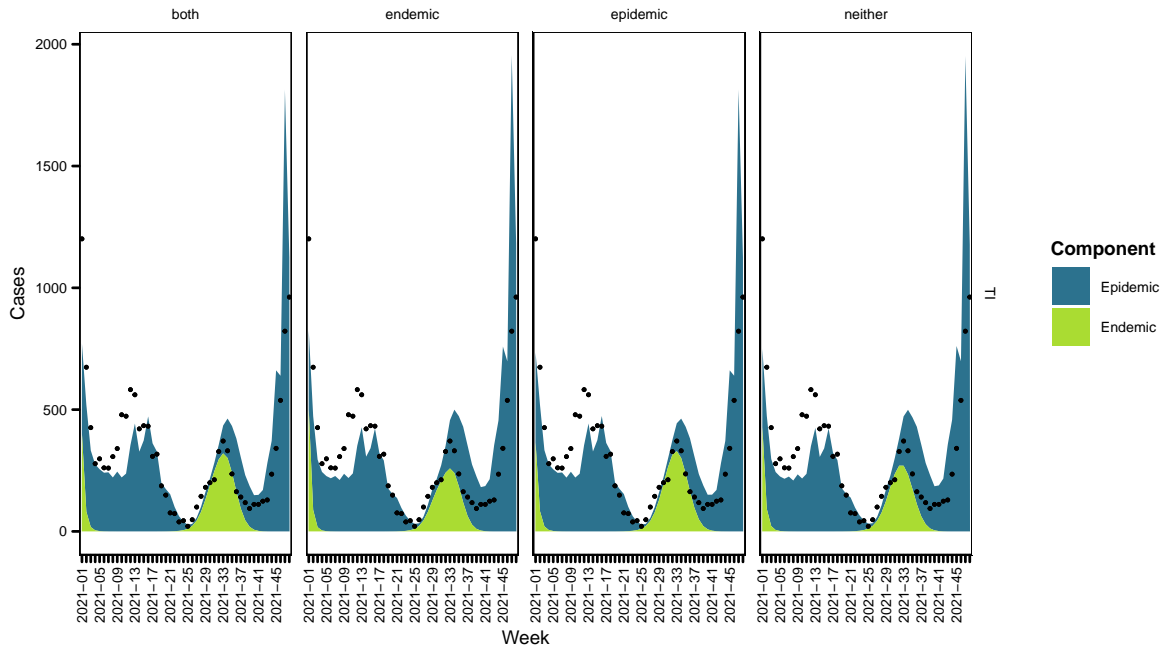

92



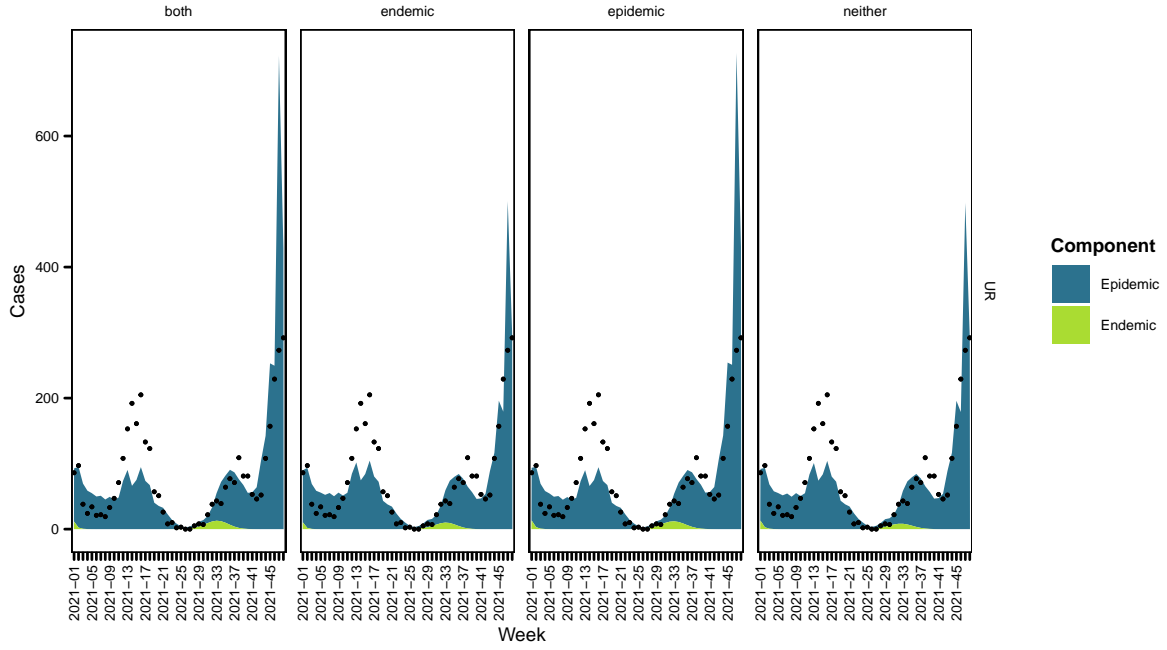

93

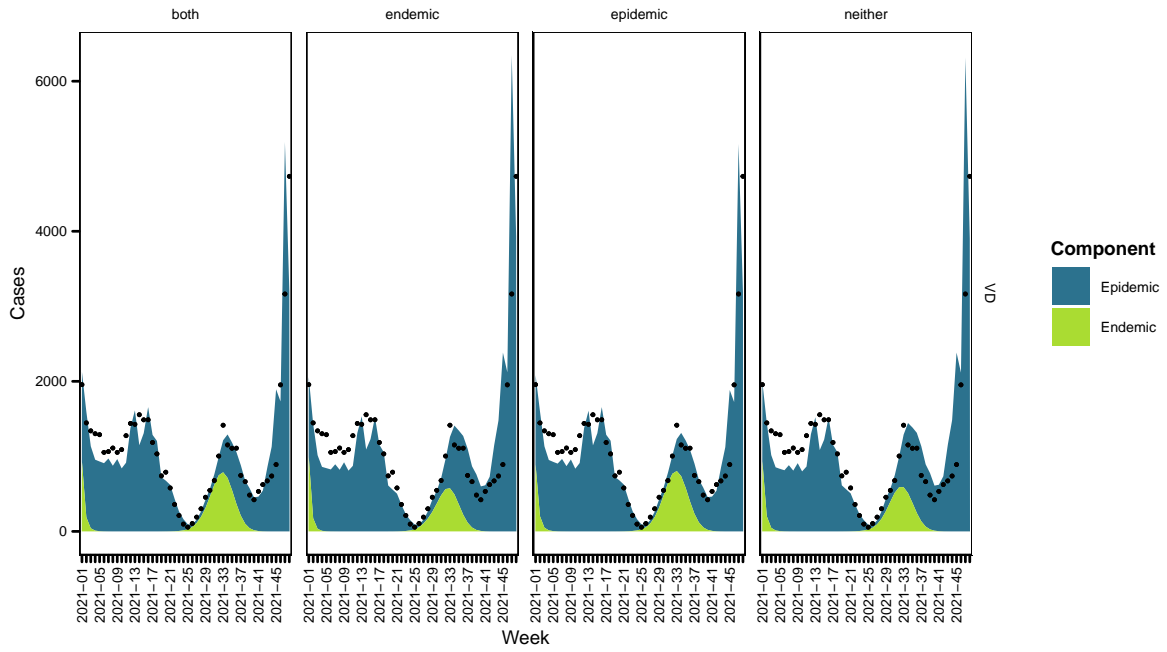

94

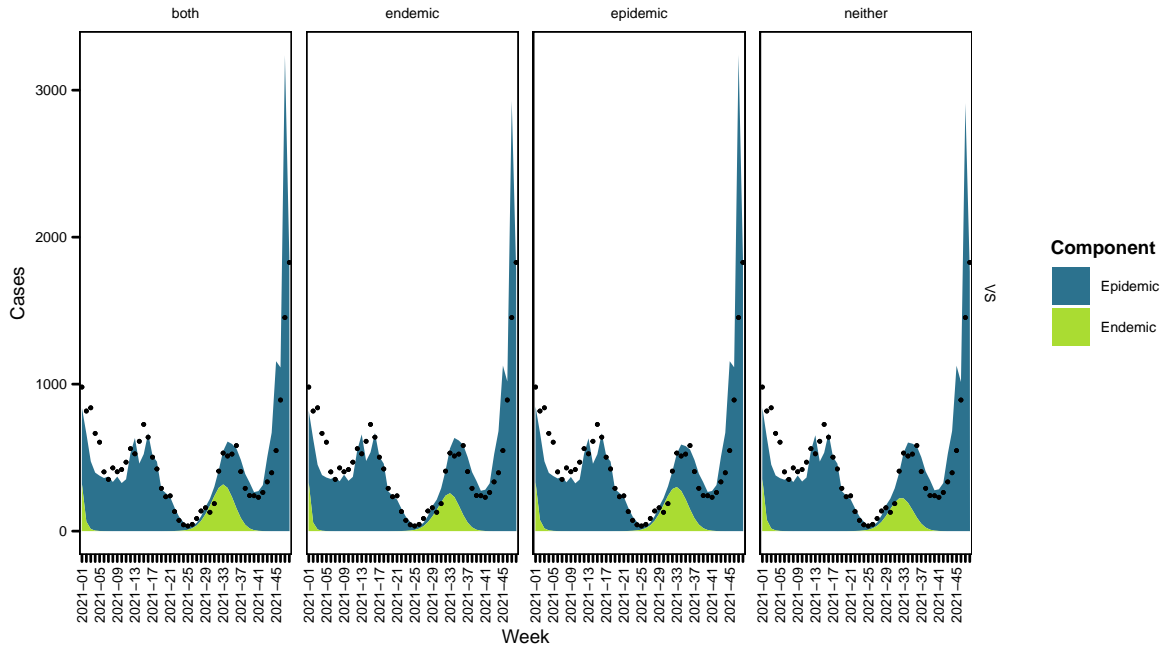

95

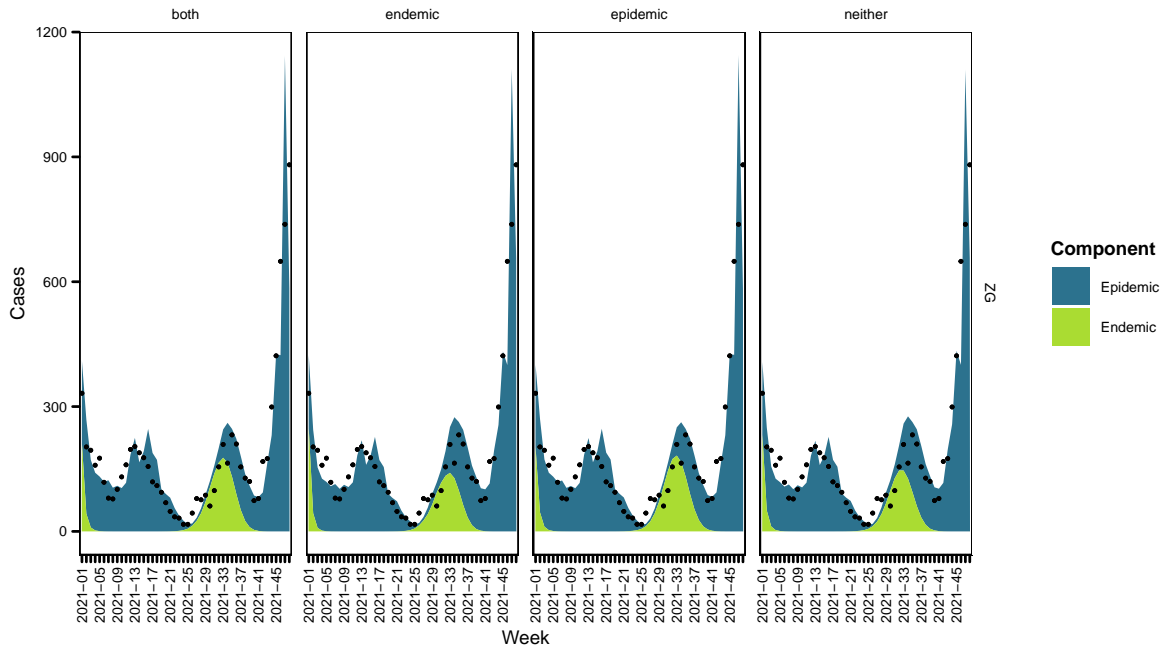

96

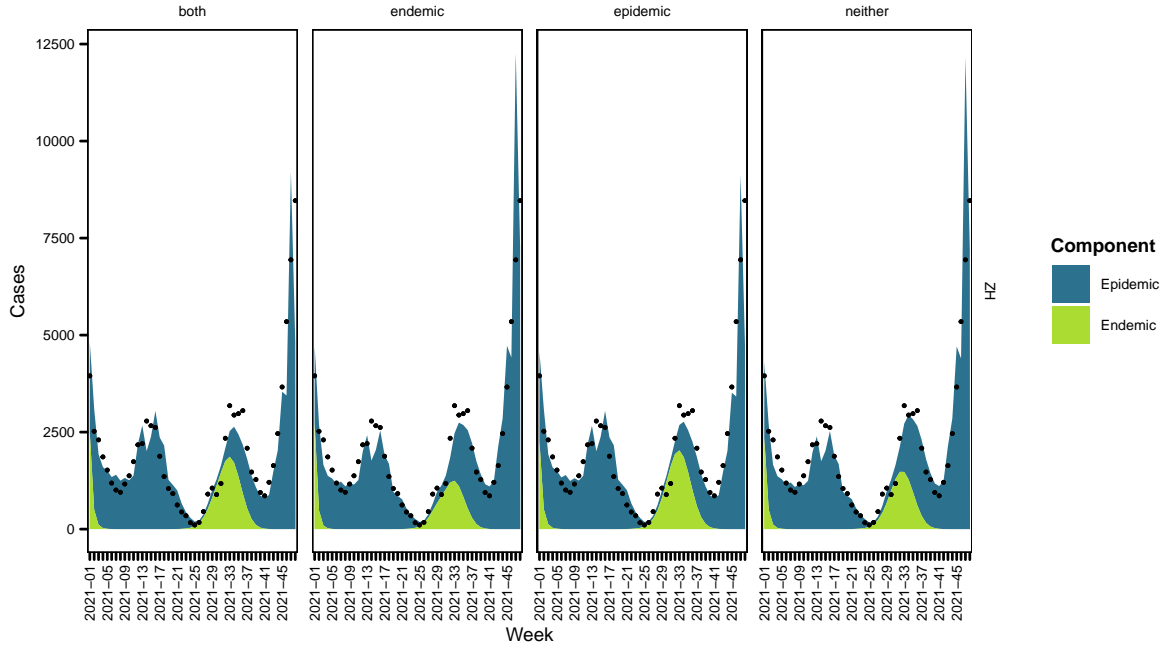

97

### 98 3 Scenario analysis

99 Now we consider the effects of vaccination coverage which is the maximum across re-  
 100 gions,  $\max_r x_{rt}$

**Coverage (second dose and booster with waning taken into account)**

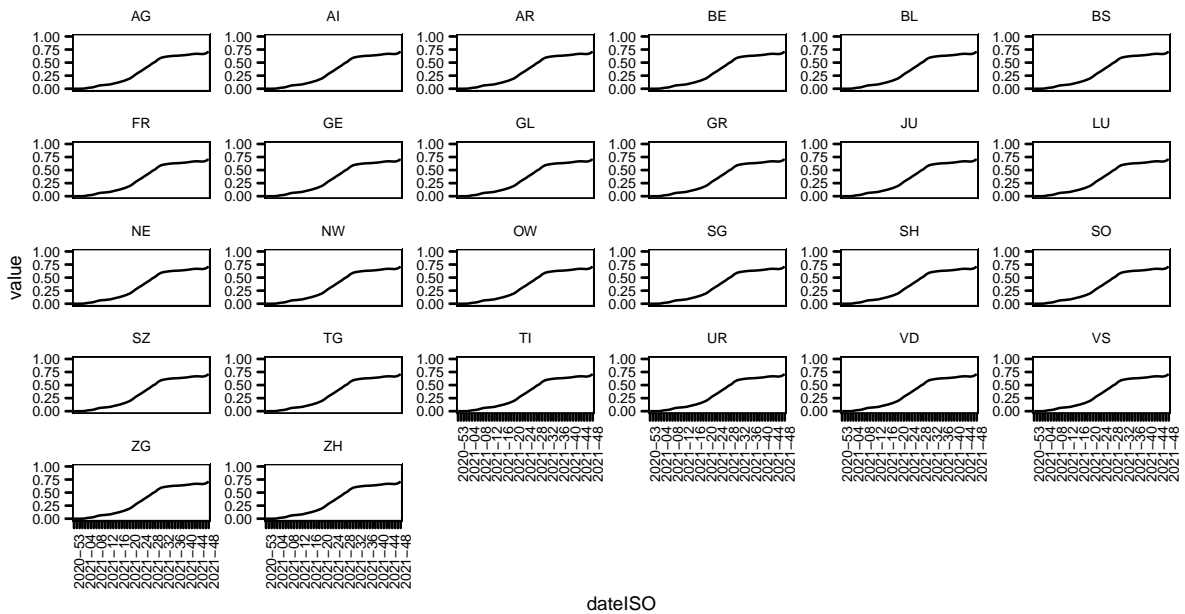

101

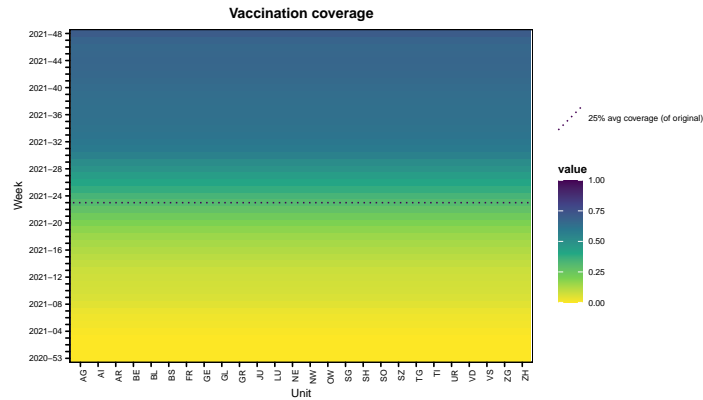

102

### 103 3.1 Predicted cases

104 Under the assumption that the study period covers the outbreak, we calculate the pre-  
 105 dicted number of COVID-19 cases under the alternative vaccination coverage scenario  
 106 scenario. This is using the same methods we have considered in previous work [see 2–4]. The  
 107 final size of the outbreak is given (Table 1). The weekly predicted cases for the model with  
 108 vaccination coverage in the endemic component with time-varying weights are presented as  
 109 this was the best fitting model as measured by DSS. We compare the predictions under the  
 110 true vaccination coverage (as observed by BAG) and the alternative scenario of maximum  
 111 coverage. The ratio is the ratio of predicted cases under the alternative vaccination cover-  
 112 age scenario against predicted cases under the observed vaccination coverage scenario.

113 Below we show predicted cases under the two vaccination coverages (as observed and  
 114 maximum coverage across regions) and ratio between the two

**Table 1:** Final size estimates based on path forecasts

|    | Original coverage |         |          |       | Alternative coverage |          |       |
|----|-------------------|---------|----------|-------|----------------------|----------|-------|
|    | True              | Endemic | Epidemic | Both  | Endemic              | Epidemic | Both  |
| AG | 24208             | 42919   | 23073    | 22502 | 31254                | 8402     | 6924  |
| AI | 1288              | 1925    | 1339     | 1292  | 1385                 | 192      | 154   |
| AR | 3687              | 4795    | 3086     | 2988  | 3481                 | 537      | 432   |
| BE | 37976             | 58133   | 28781    | 28026 | 42970                | 11296    | 9738  |
| BL | 10983             | 16992   | 9262     | 8999  | 12751                | 3810     | 3410  |
| BS | 7531              | 11523   | 5482     | 5341  | 8757                 | 3007     | 2724  |
| FR | 10182             | 21343   | 9765     | 9495  | 15612                | 3234     | 2659  |
| GE | 19107             | 41614   | 21638    | 21308 | 30515                | 9968     | 8516  |
| GL | 2413              | 3541    | 2433     | 2423  | 2407                 | 790      | 589   |
| GR | 9279              | 13867   | 7458     | 7290  | 10029                | 2480     | 2012  |
| JU | 2586              | 5798    | 3493     | 3410  | 4168                 | 879      | 695   |
| LU | 18050             | 30844   | 16897    | 16602 | 22215                | 5761     | 4676  |
| NE | 4708              | 11888   | 5779     | 5611  | 8727                 | 2022     | 1693  |
| NW | 2377              | 3684    | 2027     | 1969  | 2681                 | 469      | 381   |
| OW | 2571              | 4049    | 2491     | 2430  | 2898                 | 486      | 376   |
| SG | 30828             | 43552   | 27724    | 27038 | 31215                | 7094     | 5608  |
| SH | 3411              | 5272    | 2966     | 2884  | 3897                 | 1087     | 938   |
| SO | 9357              | 16315   | 8919     | 8702  | 11941                | 3390     | 2856  |
| SZ | 10431             | 15106   | 10235    | 10068 | 10690                | 2467     | 1902  |
| TG | 16314             | 20355   | 13565    | 13226 | 14548                | 3399     | 2709  |
| TI | 6105              | 16835   | 8746     | 8485  | 12644                | 3754     | 3341  |
| UR | 1860              | 3762    | 2497     | 2410  | 2747                 | 404      | 333   |
| VD | 23841             | 56845   | 25277    | 24551 | 42101                | 10648    | 9175  |
| VS | 10502             | 24863   | 13690    | 13375 | 18077                | 4157     | 3441  |
| ZG | 5337              | 9020    | 4908     | 4759  | 6702                 | 2055     | 1775  |
| ZH | 55763             | 97121   | 44679    | 42971 | 73768                | 23259    | 20912 |

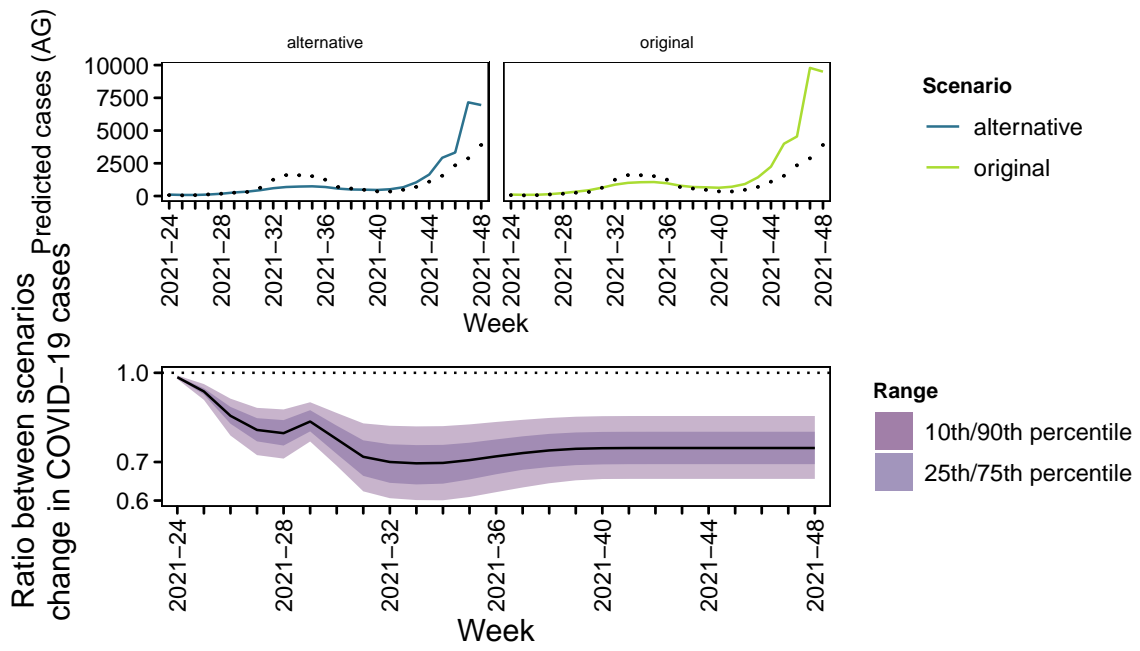

115

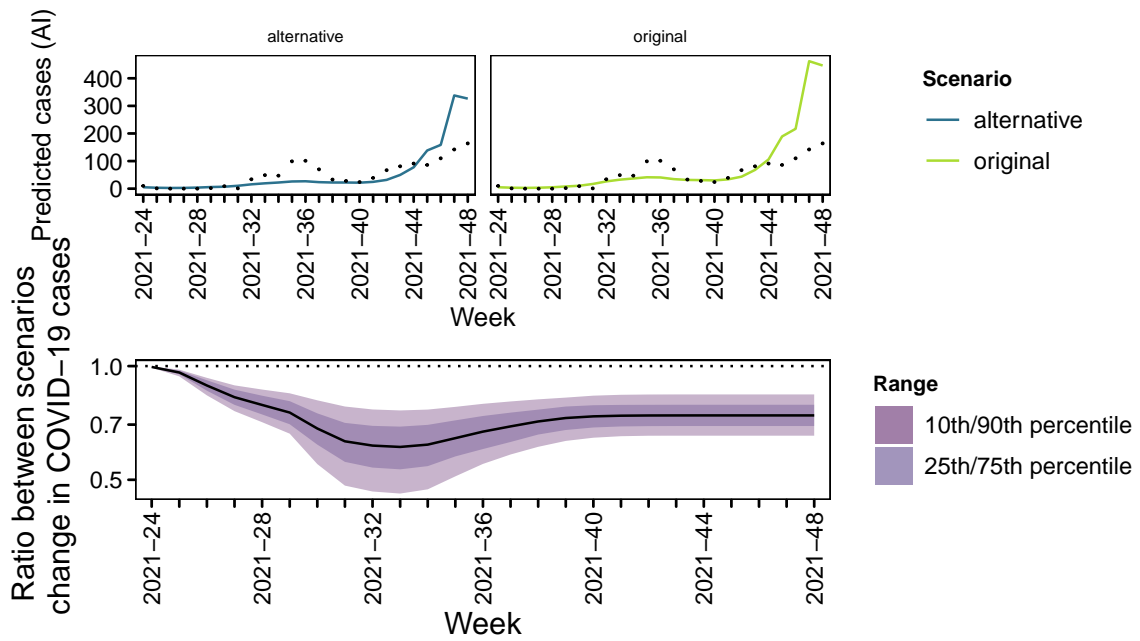

116

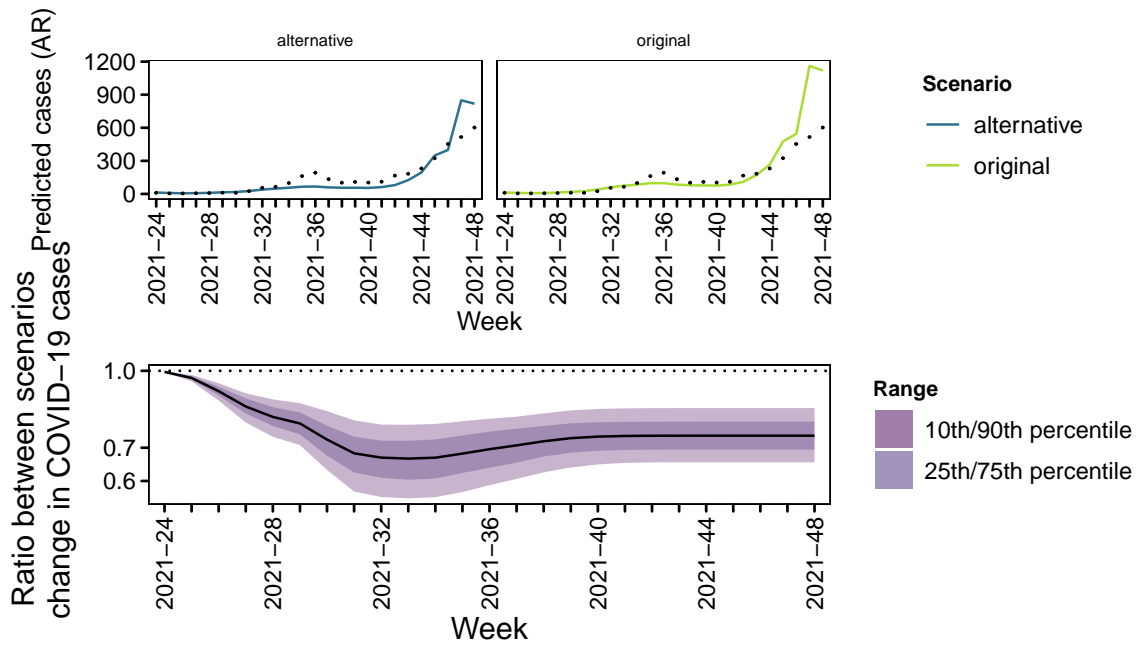

117

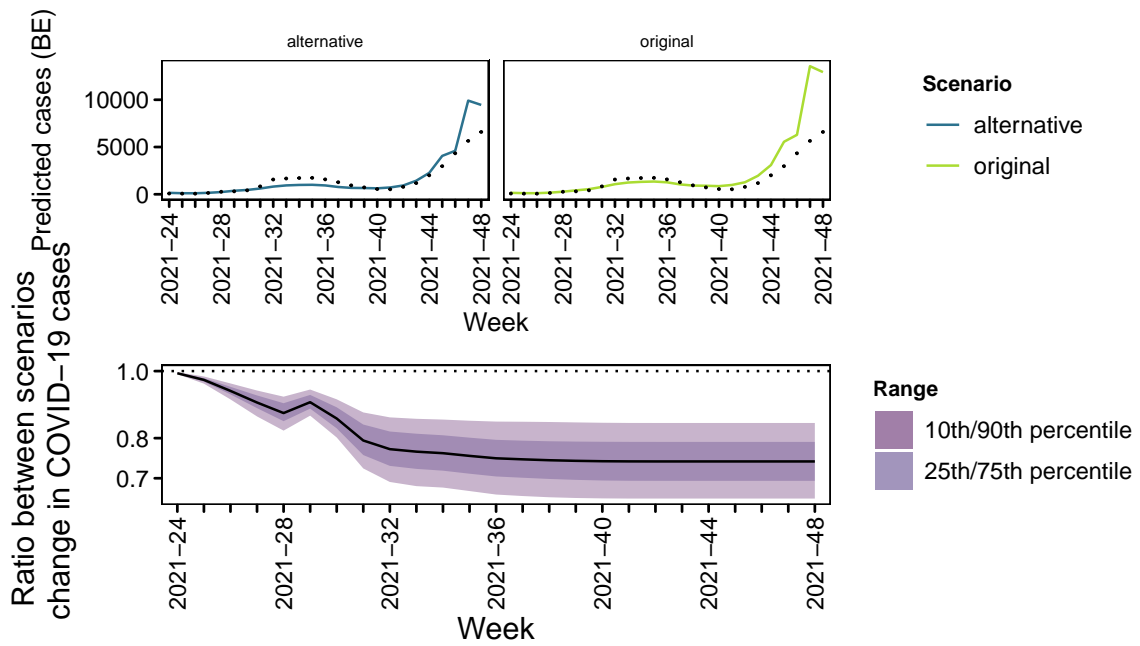

118

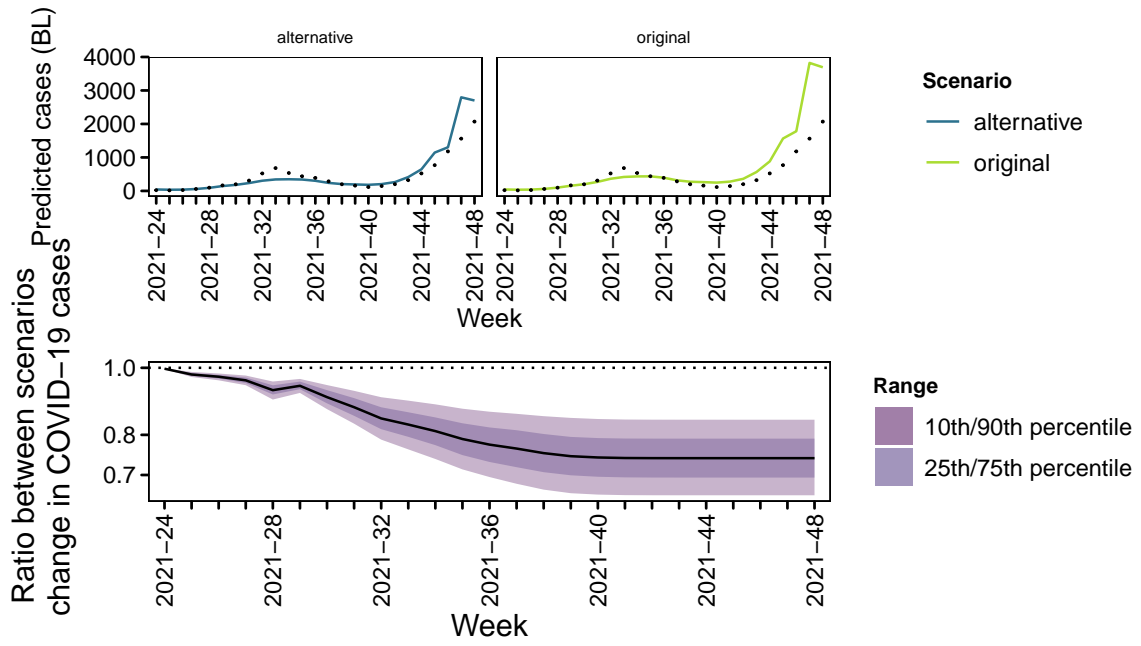

119

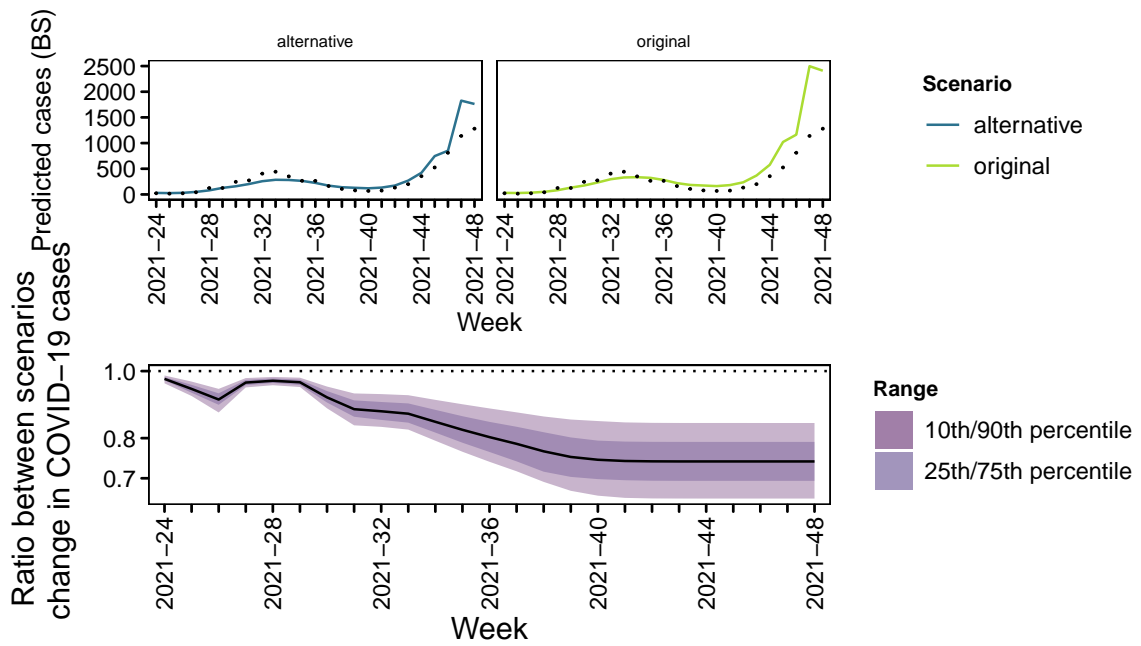

120



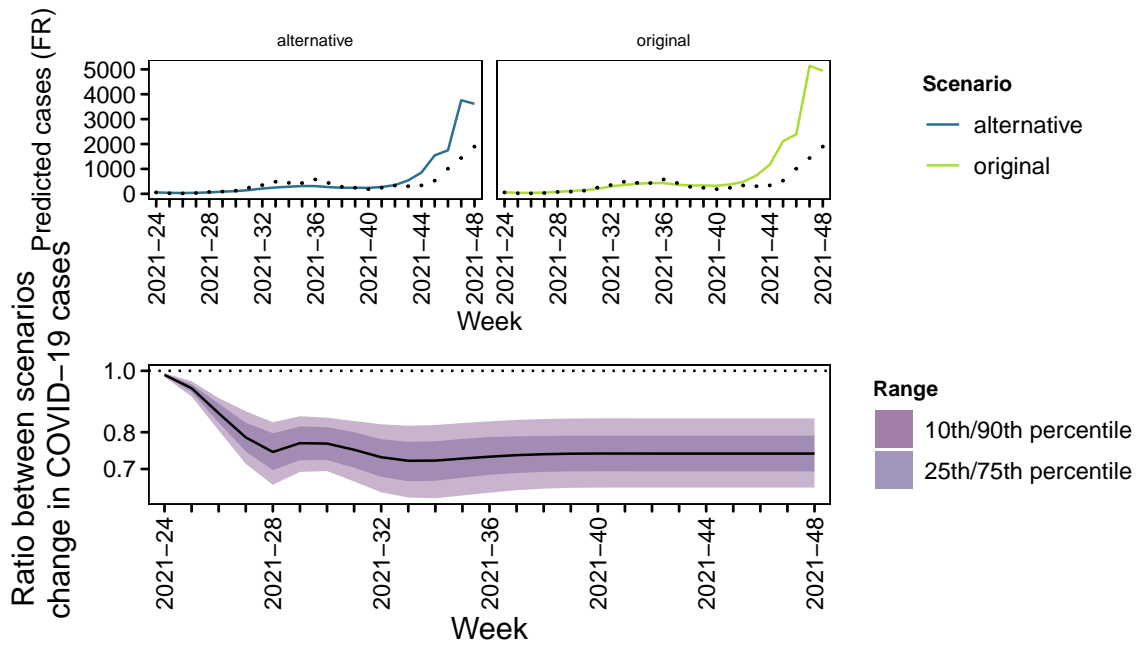

121

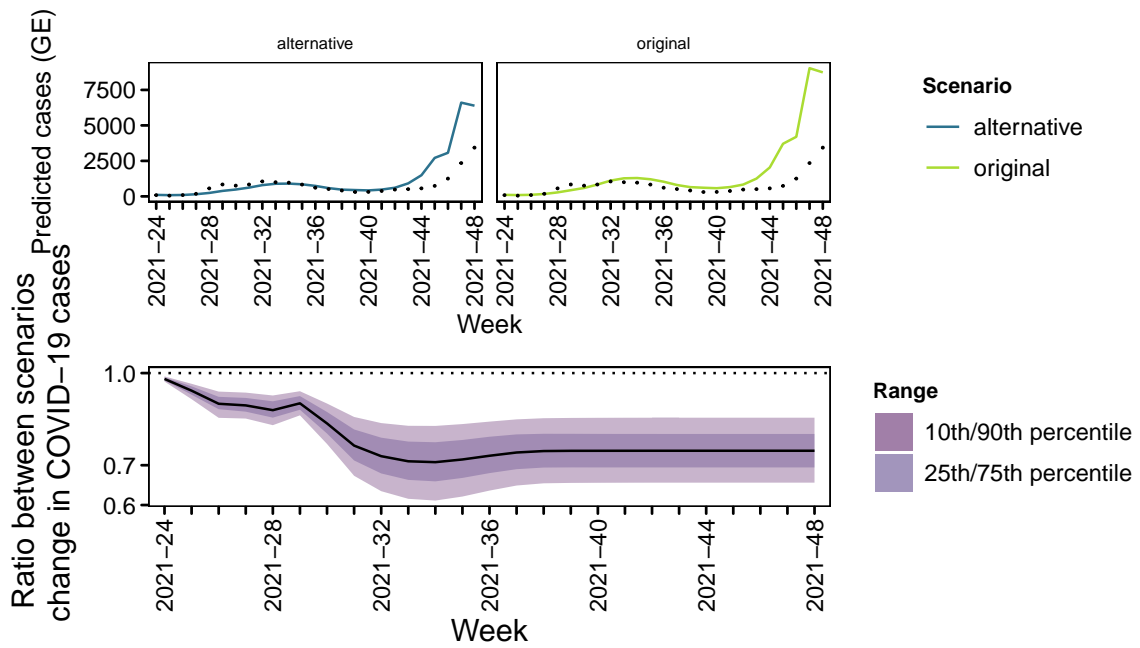

122

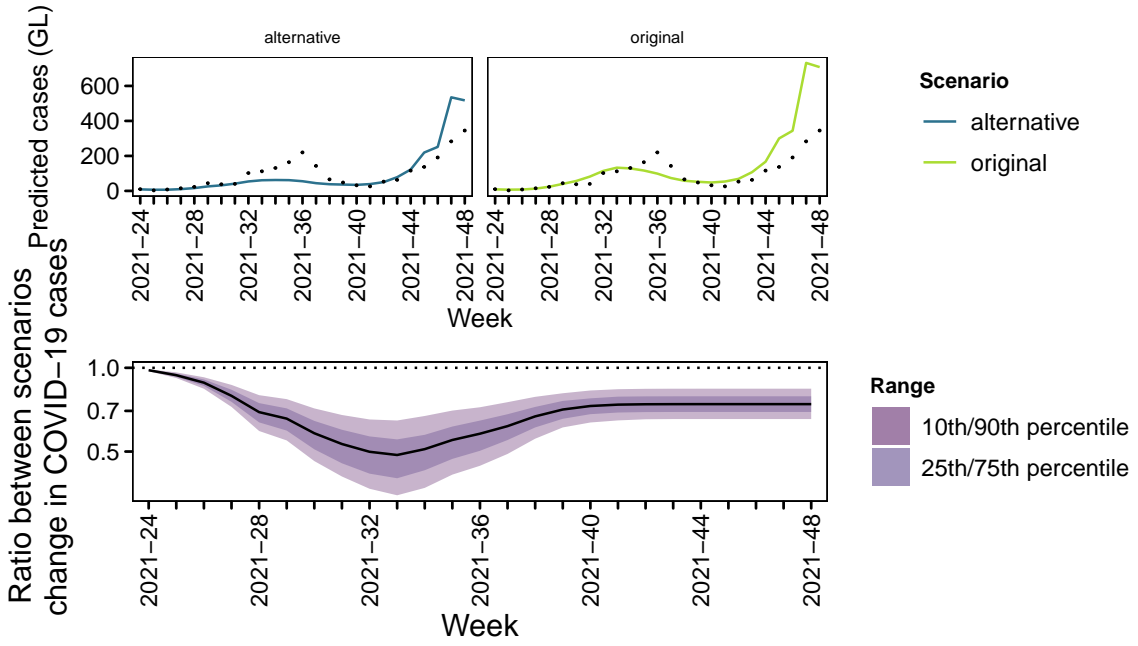

123

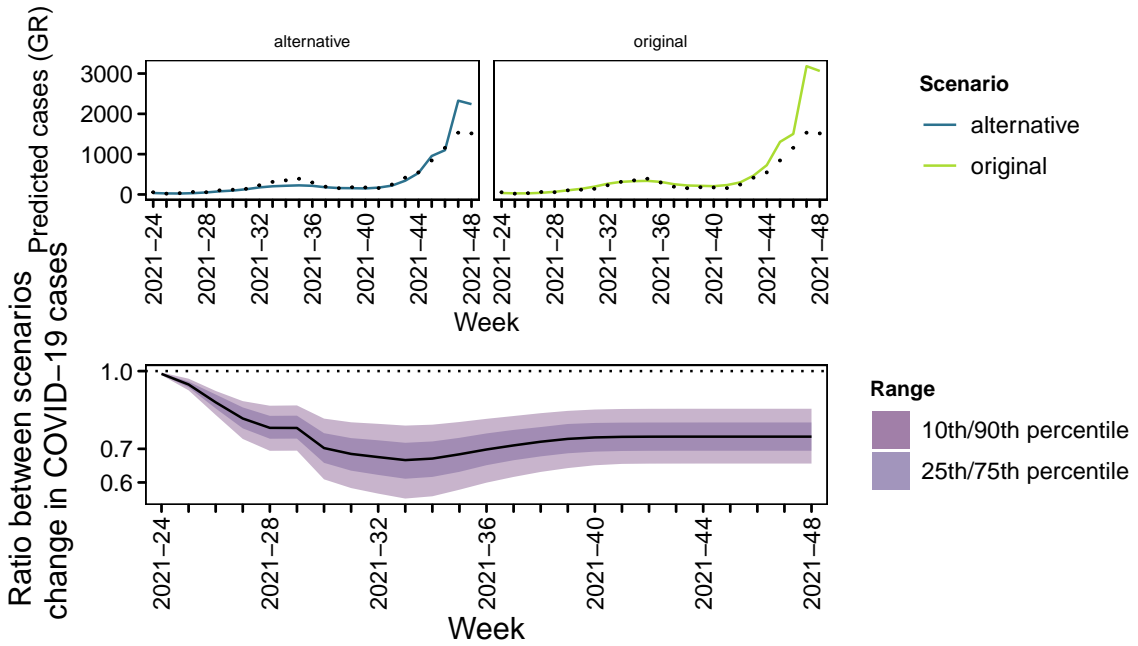

124

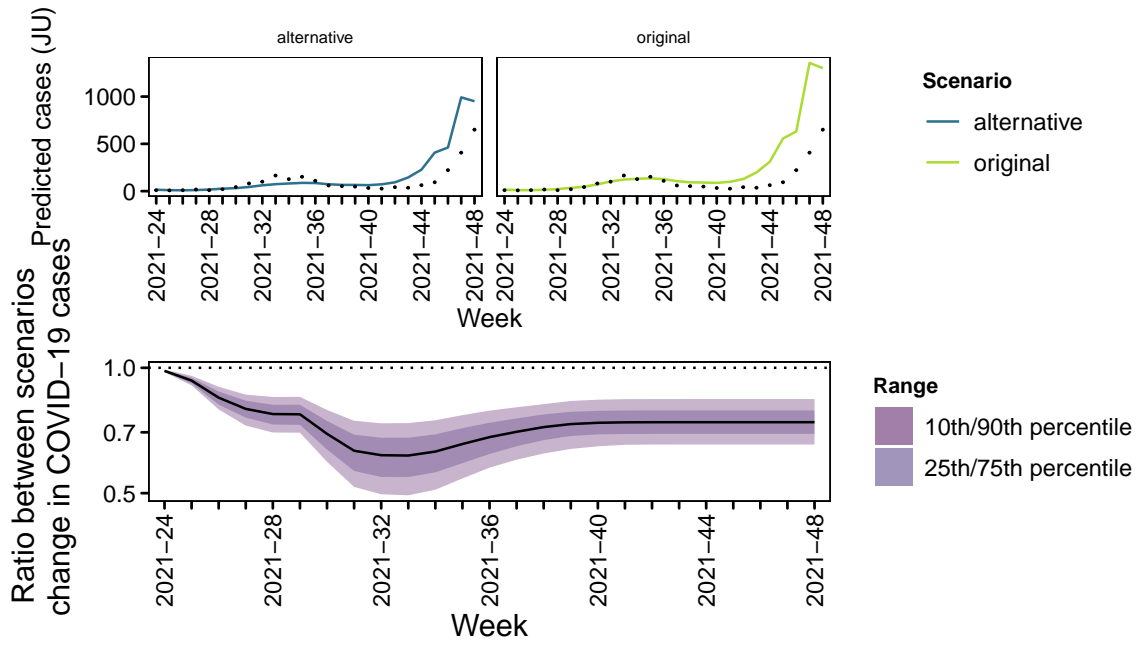

125

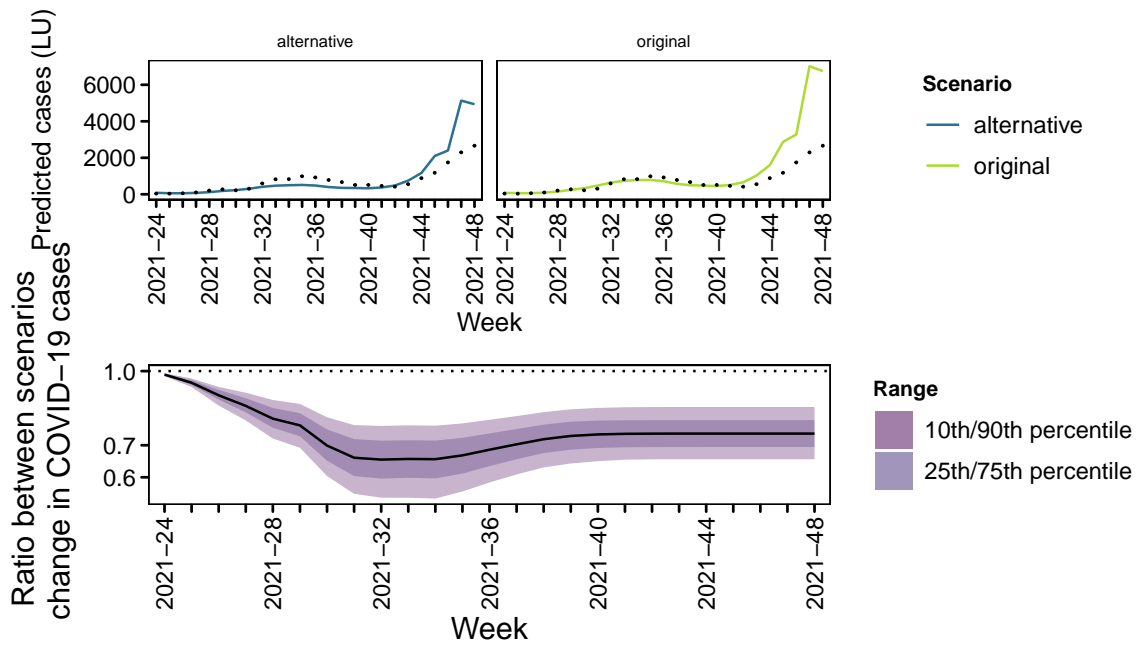

126

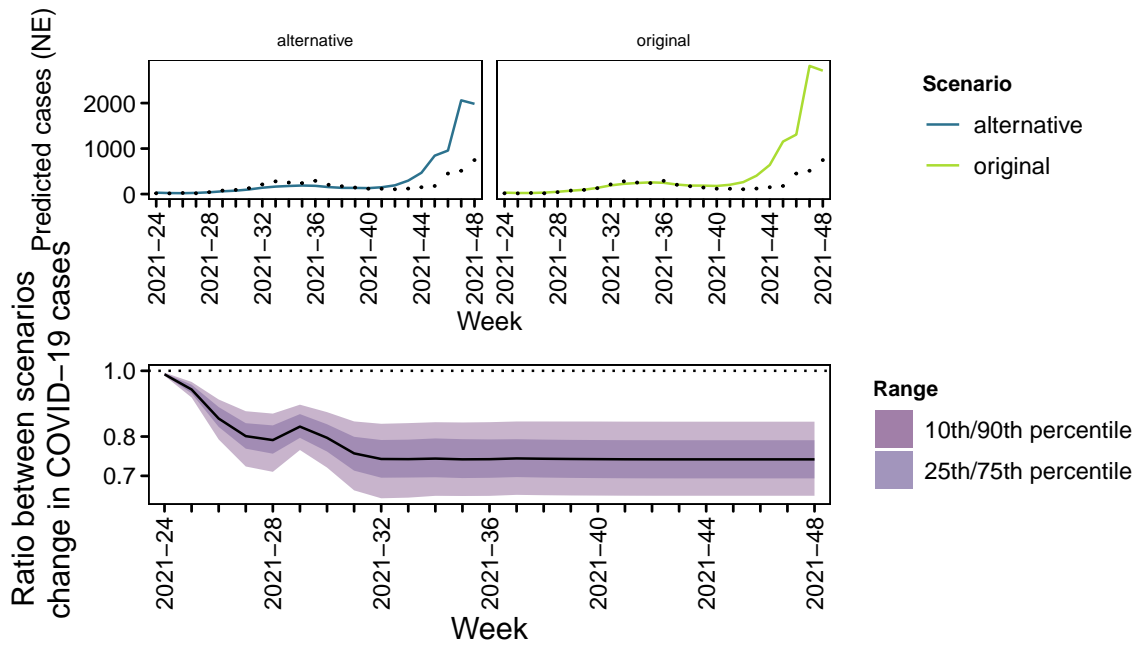

127

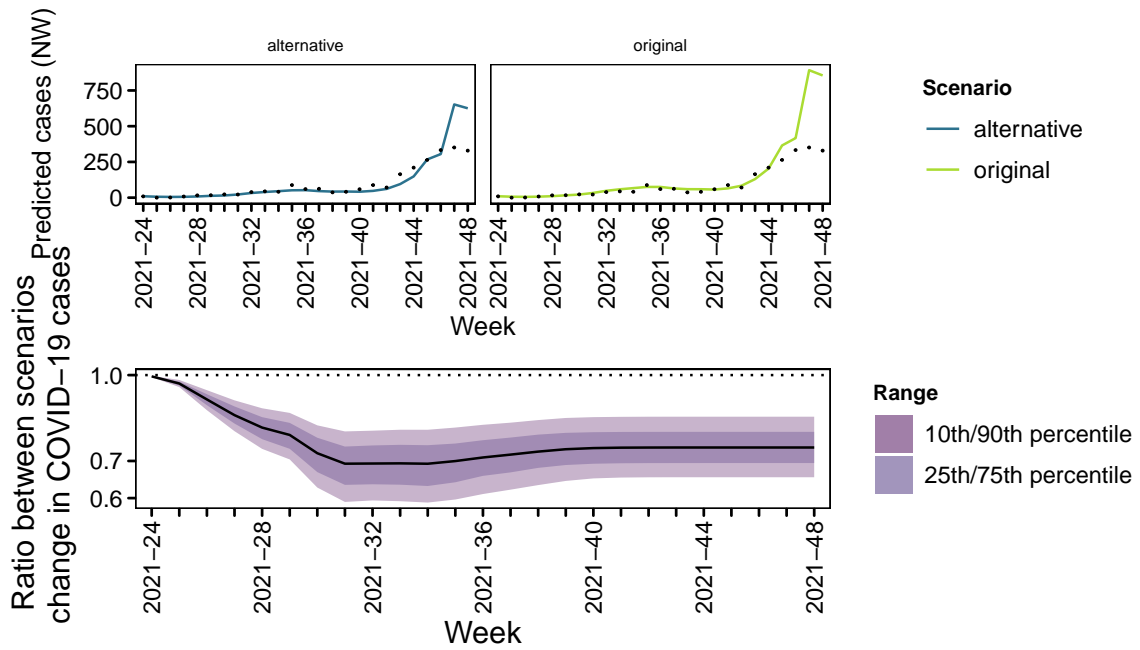

128

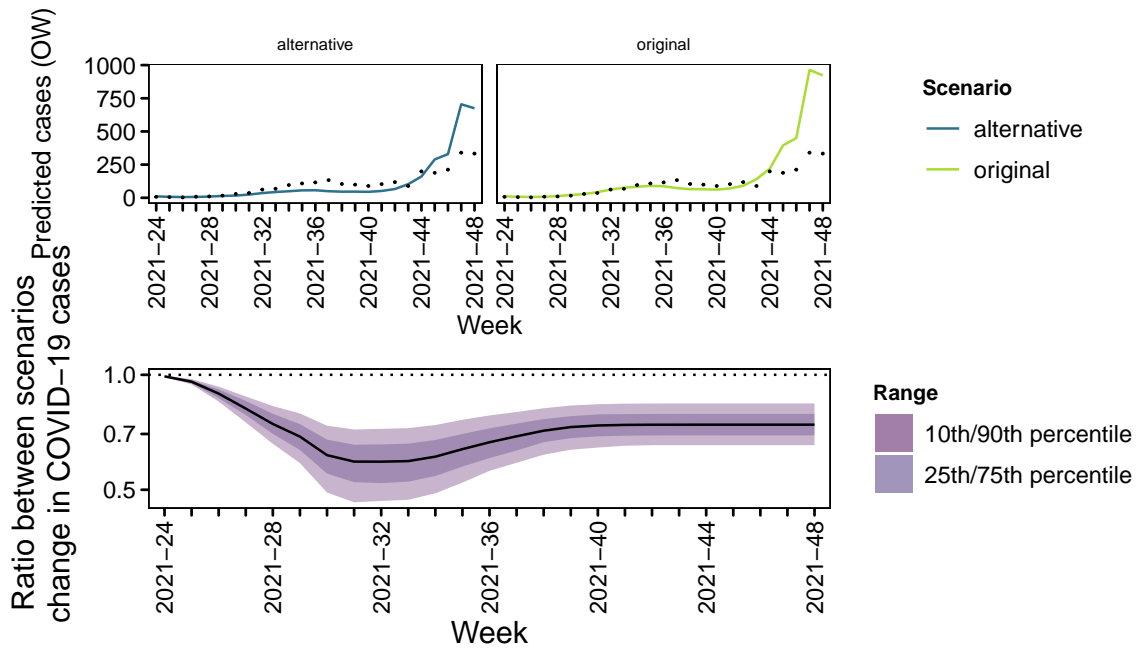

129

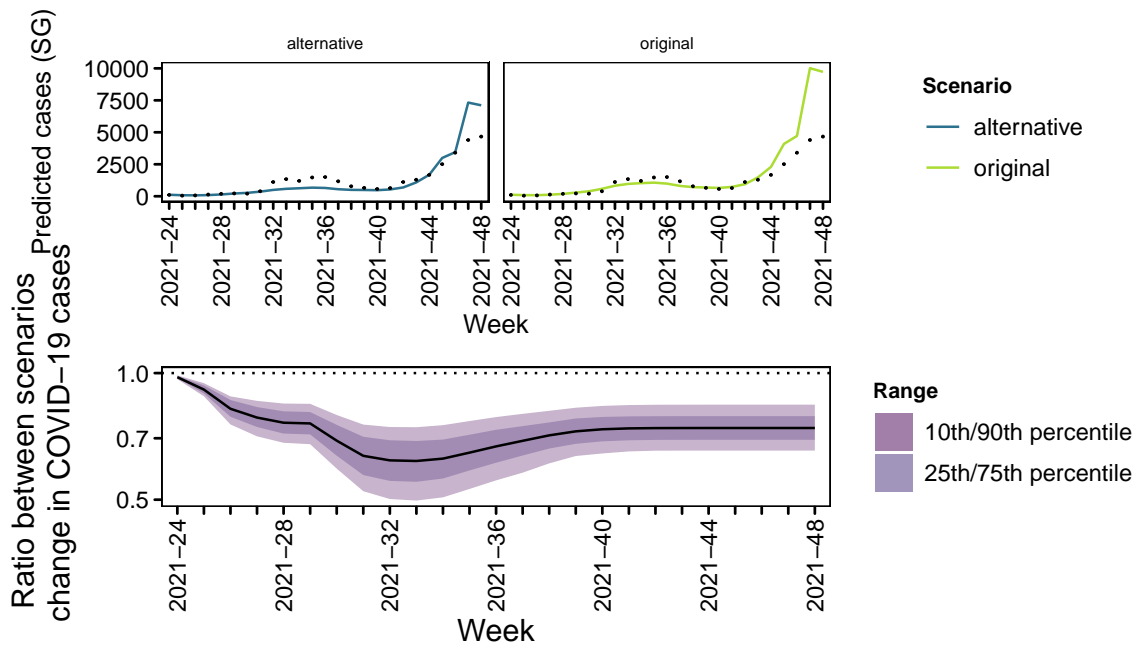

130

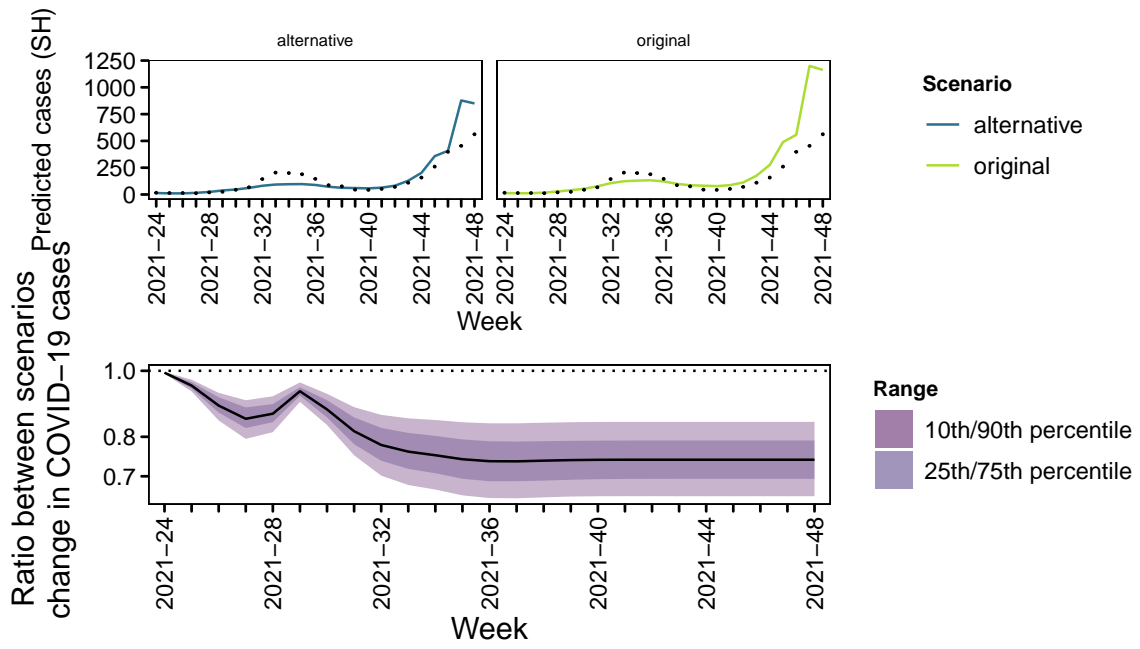

131

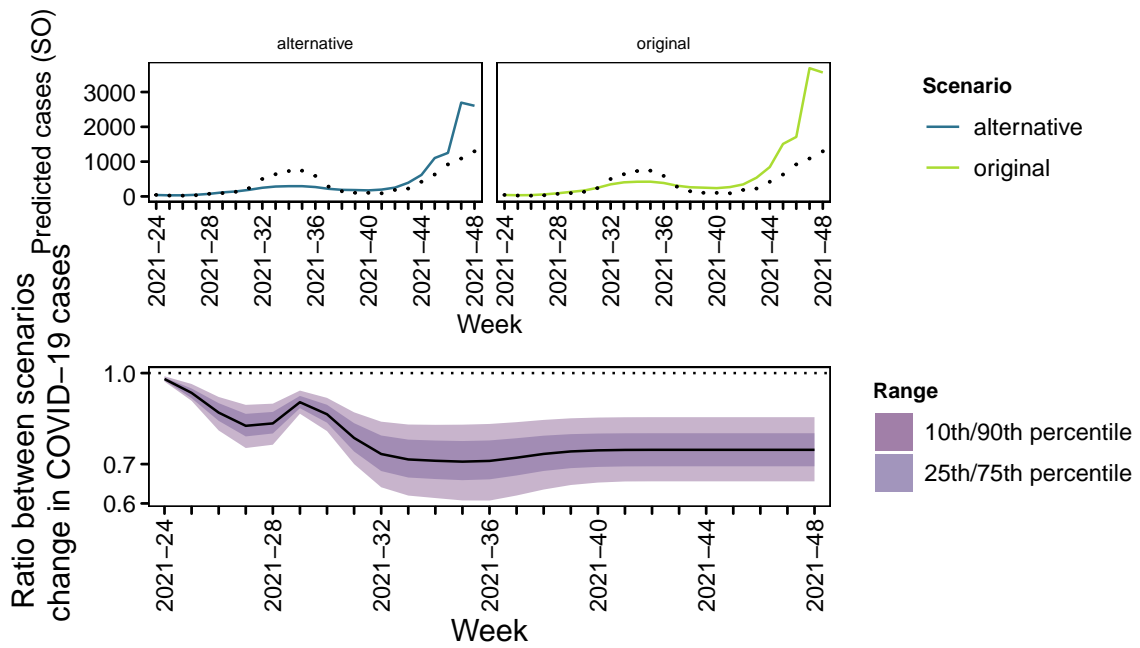

132

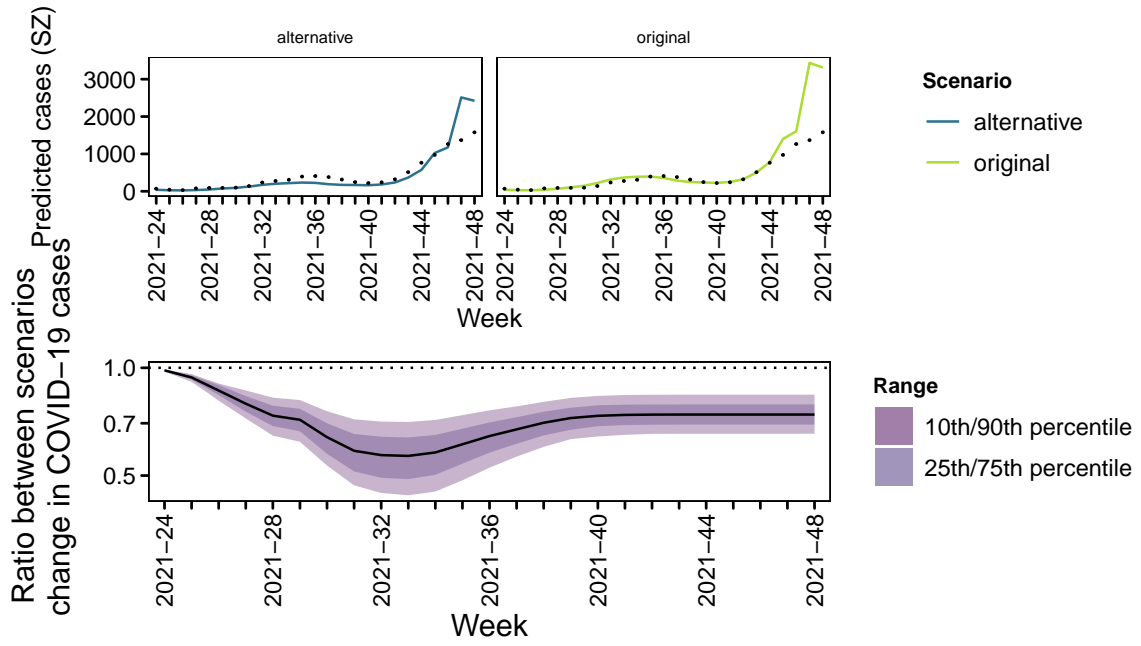

133

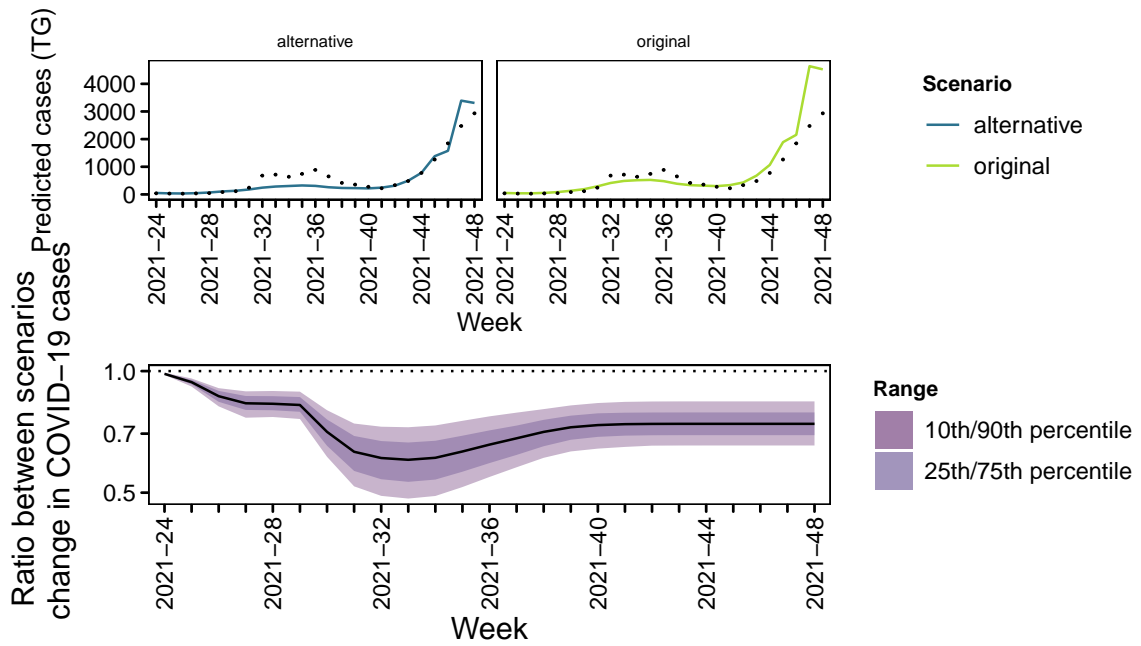

134

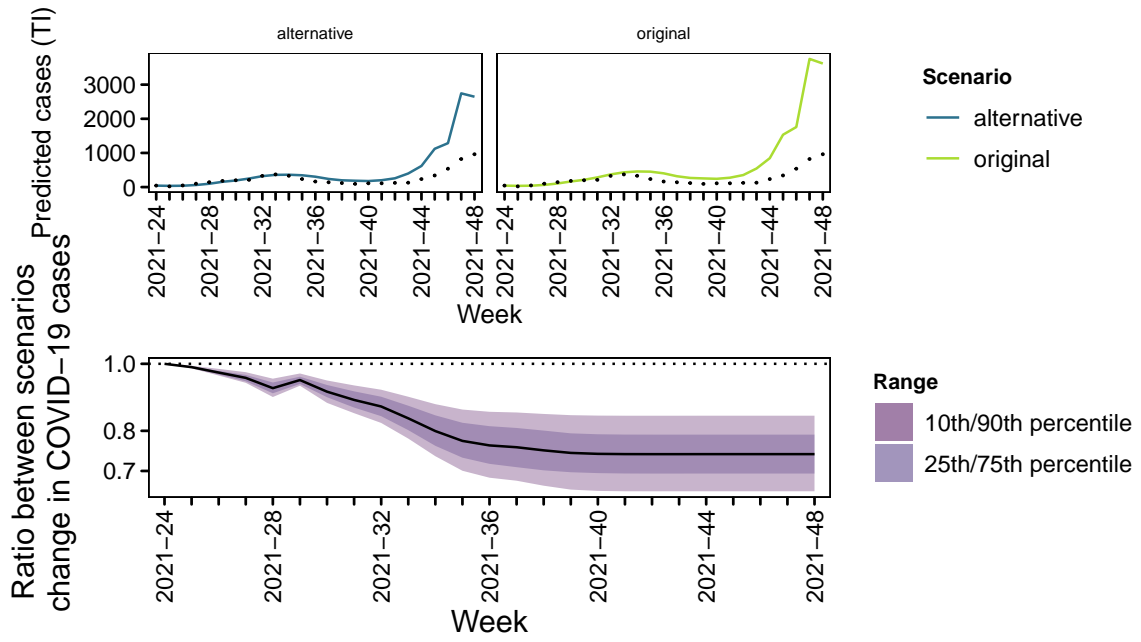

135

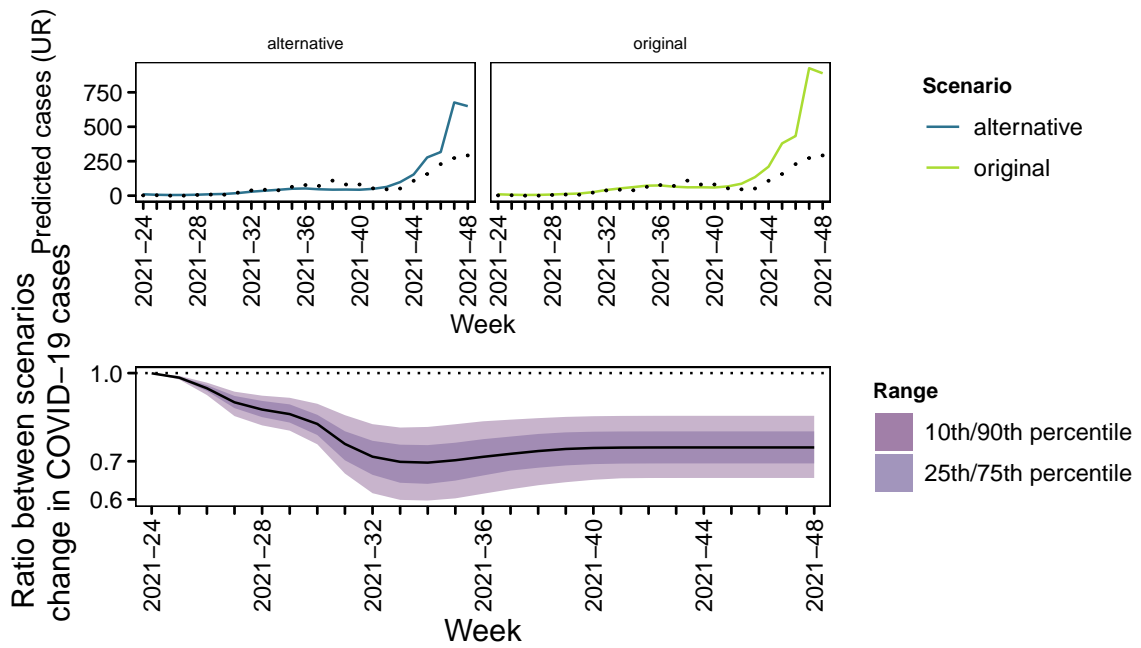

136



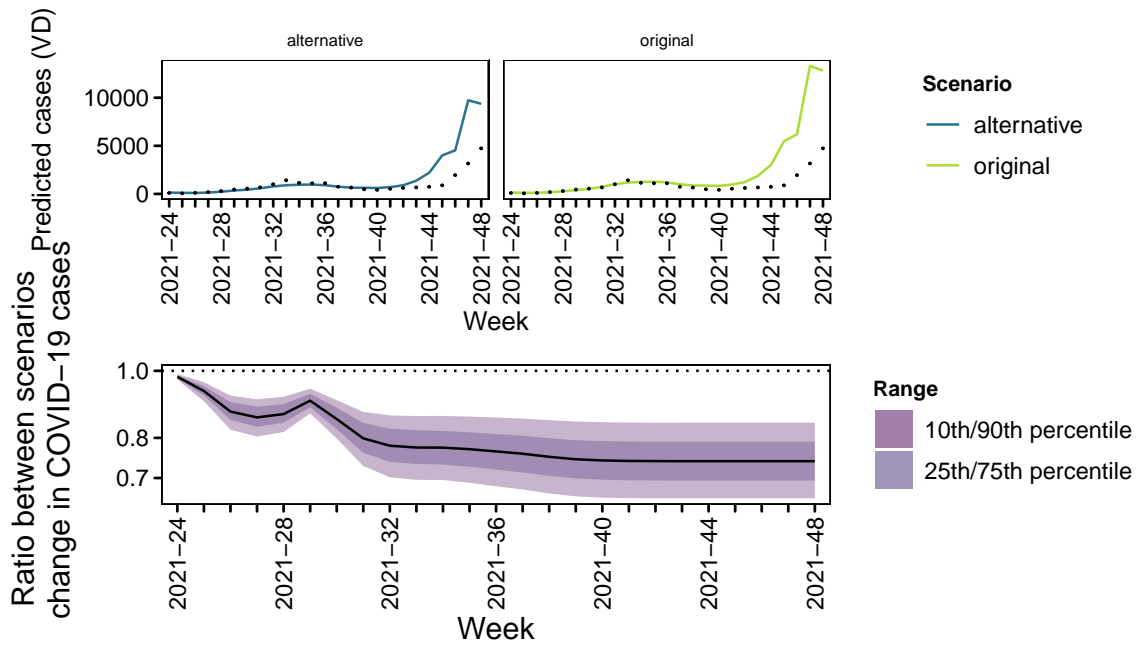

137

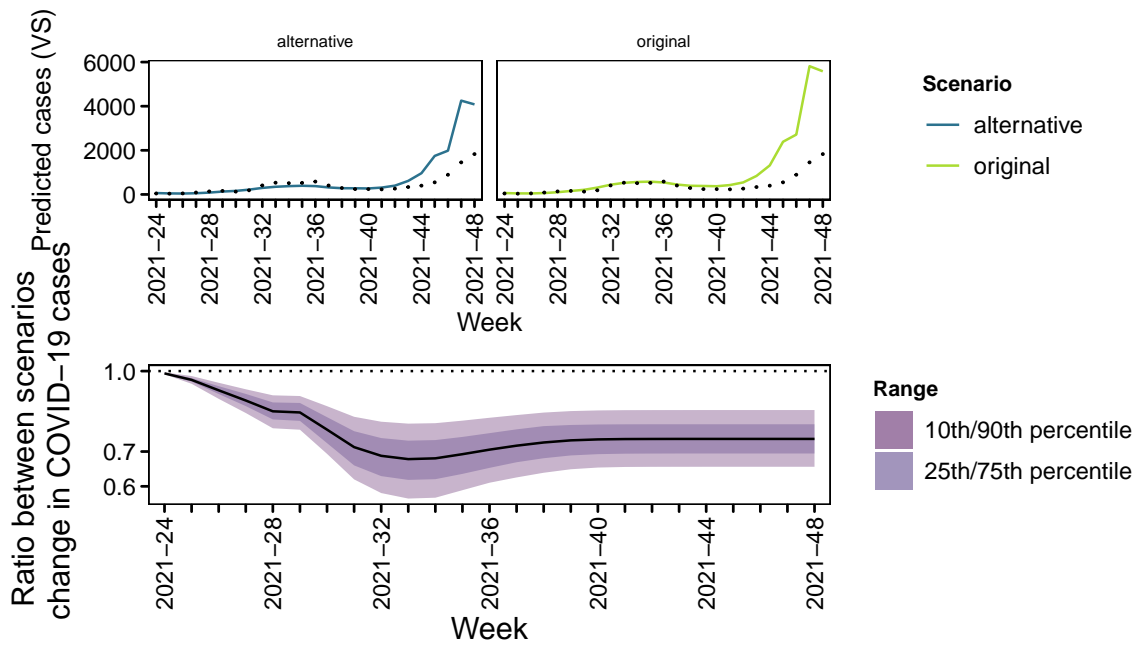

138

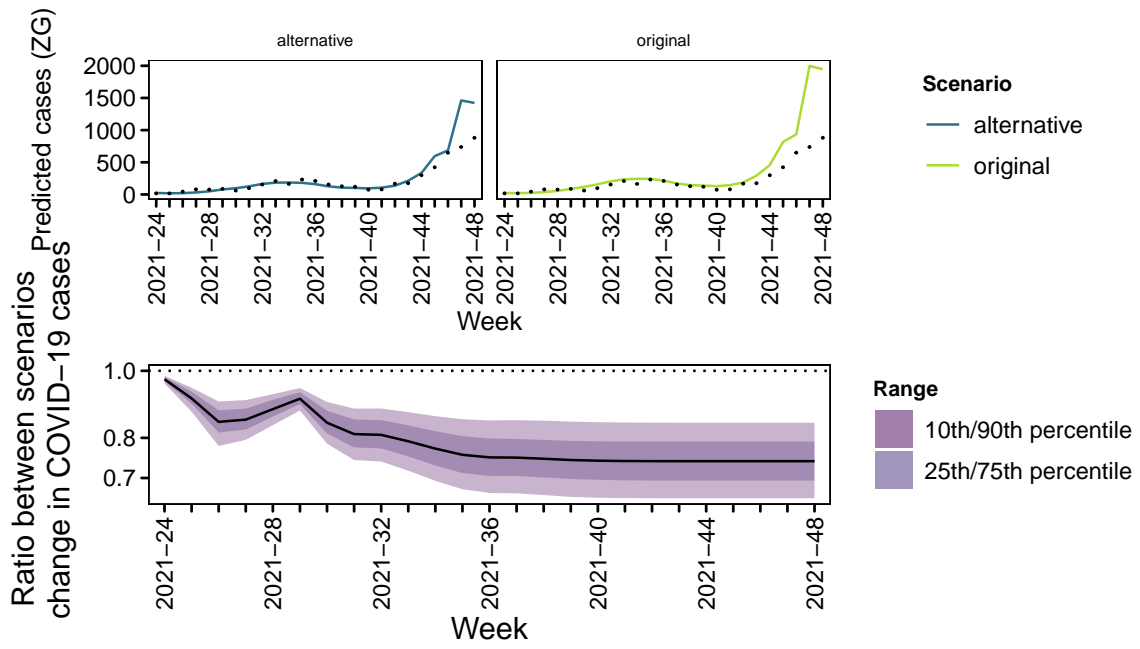

139

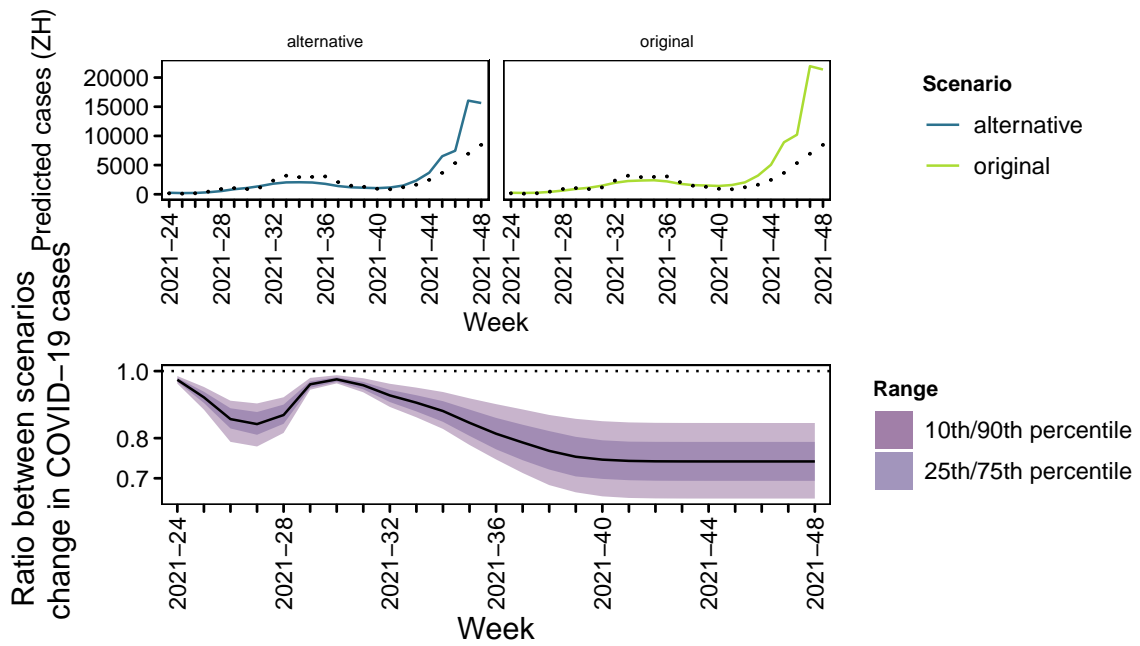

140

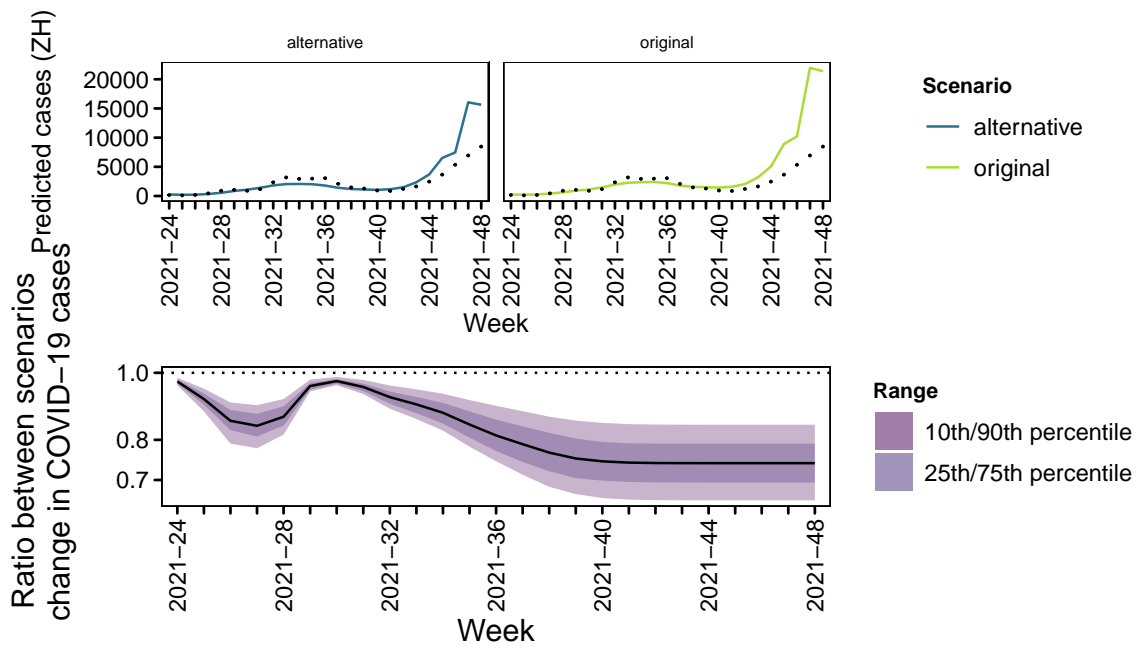

141

## 142 References

- 143 [1] M. Bekker-Nielsen Dunbar and L. Held. STUDY PROTOCOL: The COVID-19 vaccina-  
 144 tion campaign in Switzerland and its impact on disease spread. *Open Science Founda-*  
 145 *tion*, 2022. DOI:[10.17605/OSF.IO/6X4VK](https://doi.org/10.17605/OSF.IO/6X4VK).
- 146 [2] M. Grimée, M. Bekker-Nielsen Dunbar (joint first authors), F. Hofmann, and L. Held.  
 147 Modelling the effect of a border closure between Switzerland and Italy on the spa-  
 148 tiotemporal spread of COVID-19 in Switzerland. *Spatial Statistics*, page 100552, 2021.  
 149 DOI:[10.1016/j.spasta.2021.100552](https://doi.org/10.1016/j.spasta.2021.100552).
- 150 [3] M. Bekker-Nielsen Dunbar, F. Hoffmann, and L. Held. Assessing the effect of school  
 151 closures on the spread of COVID-19 in Zurich. *Journal of the Royal Statistical Society*  
 152 *Series A*, 2022. DOI:[10.1111/rssa.12910](https://doi.org/10.1111/rssa.12910).
- 153 [4] M. Bekker-Nielsen Dunbar, F. Hofmann, S. Meyer, and L. Held (joint last authors).  
 154 Endemic-epidemic modelling of school closure to prevent spread of COVID-19 in

155 Switzerland (protocol available at DOI:[10.17605/osf.io/qh3gd](https://doi.org/10.17605/osf.io/qh3gd)). *medRxiv*, 2023.

156 DOI:[10.1101/2023.03.21.23287519](https://doi.org/10.1101/2023.03.21.23287519).
