# Supplementary material for: The COVID-19 vaccination campaign in Switzerland and its impact on disease spread
Source: bioRxiv or medRxiv preprint supplement (doi:10.1101/2023.04.06.23288251), 2023-04-12
Supplement: Supplementary file [file media-3.pdf]

The COVID-19 vaccination campaign in Switzerland and its impact on disease spread – supporting information

Supporting information

M. Bekker-Nielsen Dunbar and L. Held

Epidemiology, Biostatistics and Prevention Institute, University of Zurich

E-mail: [maria.dunbar@uzh.ch](mailto:maria.dunbar@uzh.ch)

1 For full information on the work this document supports please see the manuscript and  
2 the study protocol [1]. This supporting document contains additional plots.

3 **Contents**

|    |                                                      |            |
|----|------------------------------------------------------|------------|
| 4  | <b>1 Regions</b>                                     | <b>2</b>   |
| 5  | <b>2 Population</b>                                  | <b>4</b>   |
| 6  | <b>3 Contacts</b>                                    | <b>6</b>   |
| 7  | <b>4 Dispersion</b>                                  | <b>56</b>  |
| 8  | <b>5 Vaccination coverage covariate construction</b> | <b>106</b> |
| 9  | <b>6 Cases</b>                                       | <b>107</b> |
| 10 | <b>7 Measles literature</b>                          | <b>107</b> |
| 11 | <b>8 Predicted cases</b>                             | <b>108</b> |
| 12 | 8.1 Summed across prediction window . . . . .        | 109        |

13 **1 Regions**

14 Subnational regions in Switzerland

---

| Abbreviation | Region                 |
|--------------|------------------------|
| AG           | Aargau                 |
| AI           | Appenzell Innerrhoden  |
| AR           | Appenzell Ausserrhoden |
| BE           | Bern                   |
| BL           | Basel-Landschaft       |
| BS           | Basel-Stadt            |
| FR           | Freiburg               |
| GE           | Genève                 |
| GL           | Glarus                 |
| GR           | Graubünden             |
| JU           | Jura                   |
| LU           | Luzern                 |
| NE           | Neuchâtel              |
| NW           | Nidwalden              |
| OW           | Obwalden               |
| SG           | St. Gallen             |
| SH           | Schaffhausen           |
| SO           | Solothurn              |
| SZ           | Schwyz                 |
| TG           | Thurgau                |
| TI           | Ticino                 |
| UR           | Uri                    |
| VD           | Vaud                   |
| VS           | Valais                 |
| ZG           | Zug                    |
| ZH           | Zürich                 |

---

16 **2 Population**

17 Population in Switzerland by age and region

|    | 10 - 19 | 20 - 29 | 30 - 39 | 40 - 49 | 50 - 59 | 60 - 69 | 70 - 79 | 80+   |
|----|---------|---------|---------|---------|---------|---------|---------|-------|
| AG | 69526   | 79778   | 100400  | 96825   | 107532  | 83686   | 58426   | 33478 |
| AI | 1666    | 2010    | 2084    | 1930    | 2484    | 2025    | 1433    | 977   |
| AR | 5311    | 5879    | 7181    | 7092    | 8616    | 7372    | 5050    | 3082  |
| BE | 97838   | 115407  | 143365  | 137398  | 155465  | 129560  | 102884  | 63650 |
| BL | 28384   | 30005   | 35909   | 38786   | 45701   | 36436   | 29538   | 20175 |
| BS | 15827   | 23124   | 33455   | 27627   | 26847   | 21416   | 16101   | 13129 |
| FR | 36160   | 42907   | 46547   | 45409   | 48825   | 35229   | 25069   | 13531 |
| GE | 53904   | 64139   | 76283   | 77034   | 72478   | 48922   | 36705   | 26509 |
| GL | 3827    | 4698    | 5693    | 5328    | 6163    | 5302    | 3795    | 2322  |
| GR | 17630   | 22458   | 26120   | 26075   | 31774   | 26969   | 20461   | 12271 |
| JU | 7854    | 8949    | 8826    | 8992    | 10842   | 9320    | 7250    | 4459  |
| LU | 41479   | 52323   | 61154   | 55769   | 62118   | 48108   | 33585   | 22055 |
| NE | 19083   | 21841   | 23159   | 23956   | 25764   | 19209   | 15527   | 10363 |
| NW | 3946    | 4633    | 5642    | 5613    | 7273    | 6047    | 4461    | 2365  |
| OW | 3787    | 4199    | 5035    | 5024    | 6121    | 4946    | 3504    | 1994  |
| SG | 52232   | 64970   | 73653   | 66764   | 76399   | 60389   | 44078   | 26720 |
| SH | 7781    | 9350    | 11206   | 10746   | 12544   | 10864   | 8053    | 5401  |
| SO | 26026   | 31541   | 38552   | 35972   | 43561   | 36105   | 25255   | 15637 |
| SZ | 15362   | 18080   | 22237   | 22731   | 27140   | 20444   | 13712   | 7945  |
| TG | 27865   | 32707   | 40710   | 37213   | 44654   | 35251   | 23637   | 13791 |
| TI | 33880   | 37316   | 39781   | 48290   | 58508   | 43476   | 36178   | 26276 |
| UR | 3752    | 4333    | 4637    | 4684    | 5527    | 4778    | 3595    | 2127  |
| VD | 91874   | 106260  | 120501  | 118412  | 115937  | 80347   | 62222   | 39500 |
| VS | 34634   | 42484   | 47853   | 46165   | 53016   | 42899   | 33457   | 18921 |
| ZG | 12888   | 13188   | 18604   | 19455   | 21071   | 14649   | 10312   | 6309  |
| ZH | 146478  | 185153  | 256370  | 232249  | 223652  | 157468  | 120161  | 79000 |

18

19 **3 Contacts**

20 The time-varying contact matrices are plotted below

```
## [[1]]
```

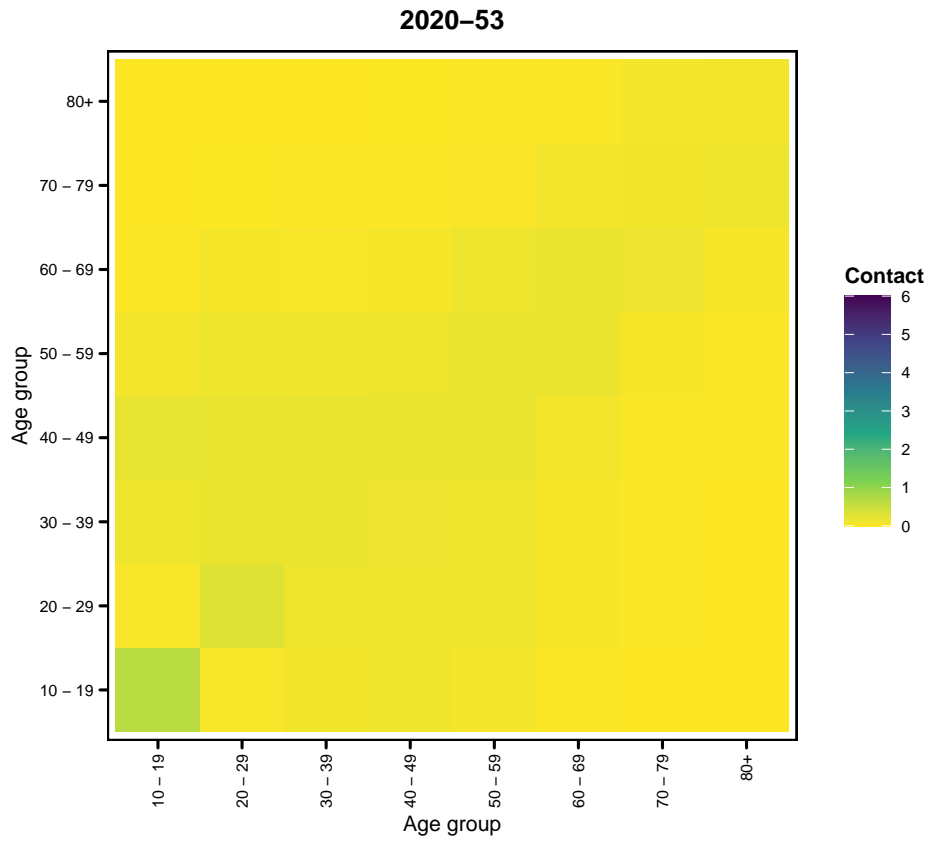

21

```
##
```

```
## [[2]]
```

### 2021-01

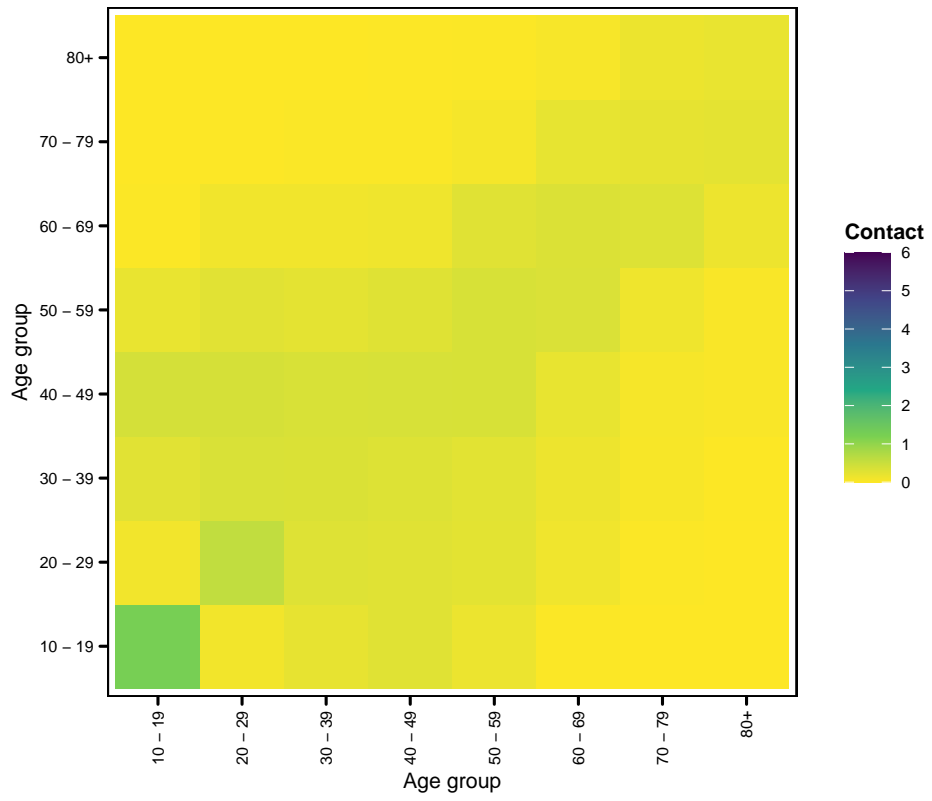

22

```
##
```

```
## [[3]]
```

### 2021-02

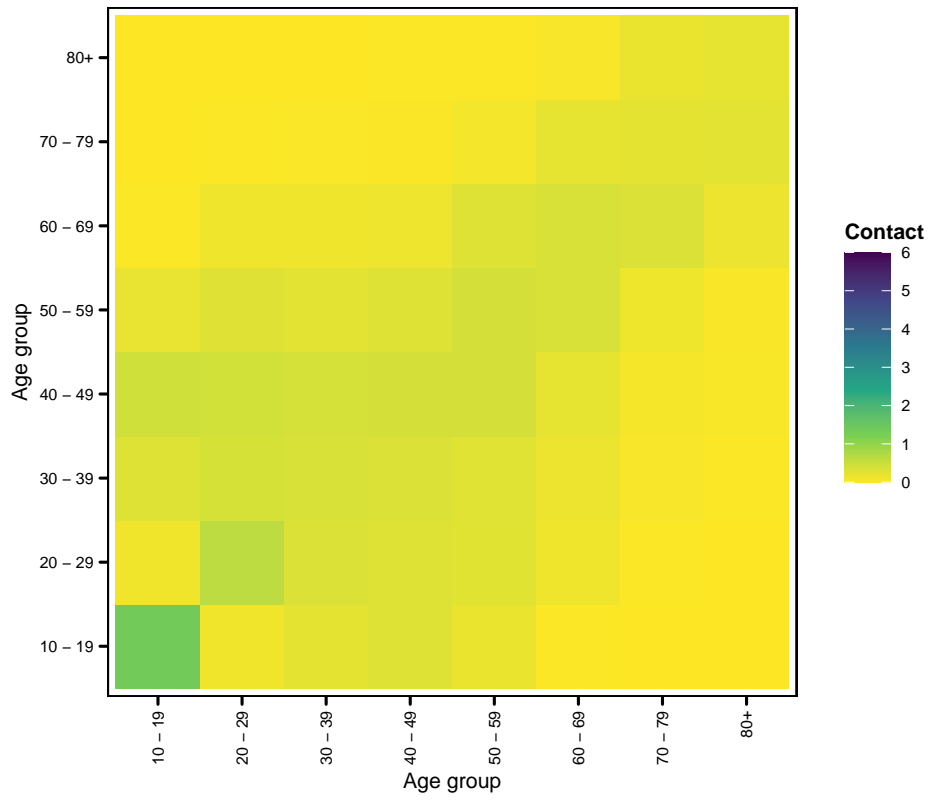

23

```
##
```

```
## [[4]]
```



### 2021-03

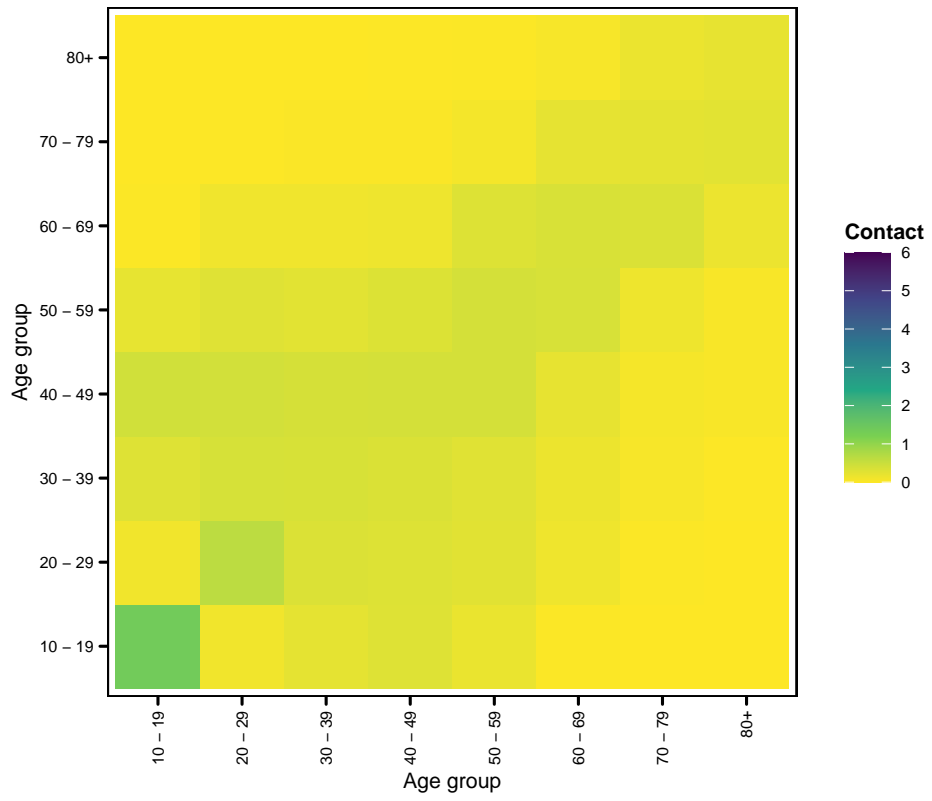

24

```
##
```

```
## [[5]]
```

### 2021-04

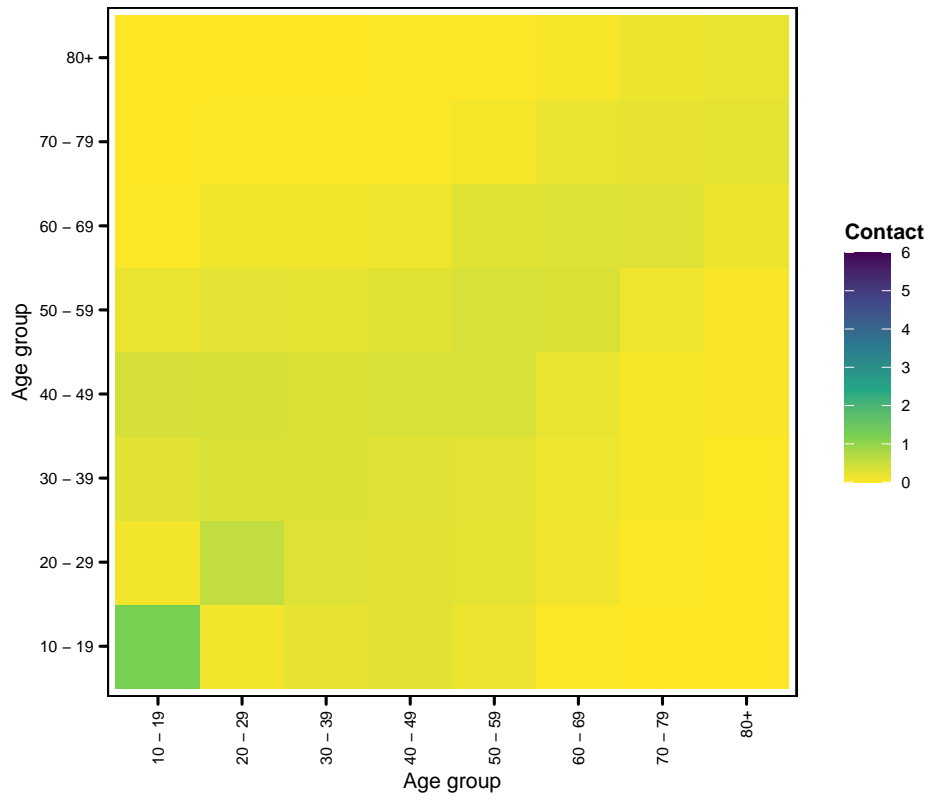

25

```
##
```

```
## [[6]]
```

### 2021-05

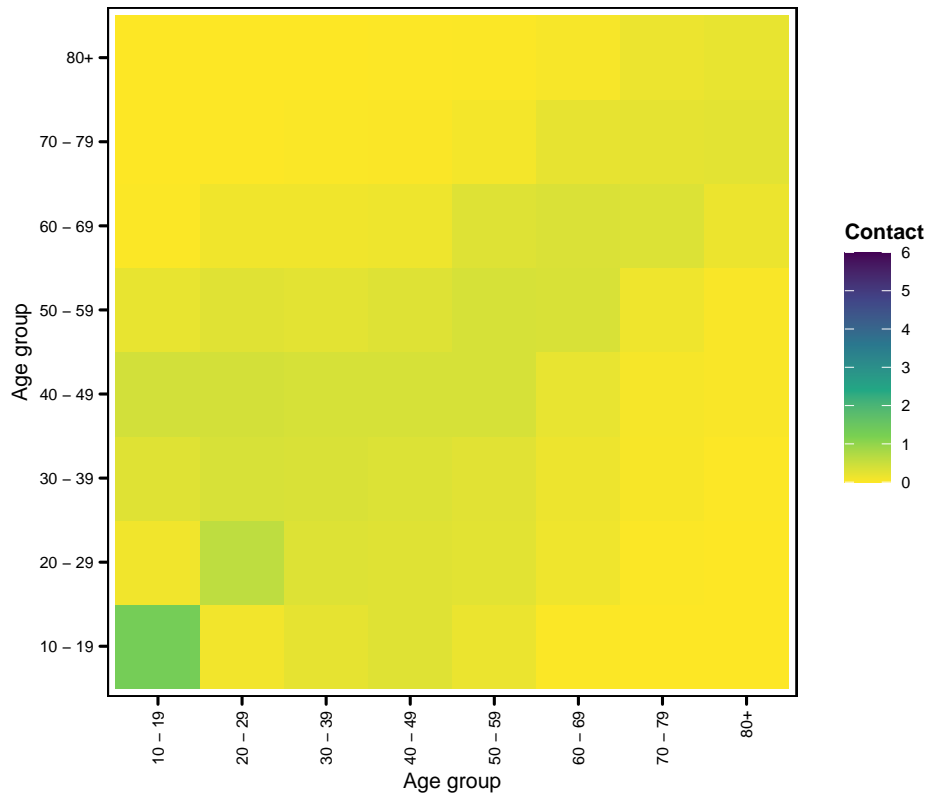

26

```
##  
## [[7]]
```

2021-06

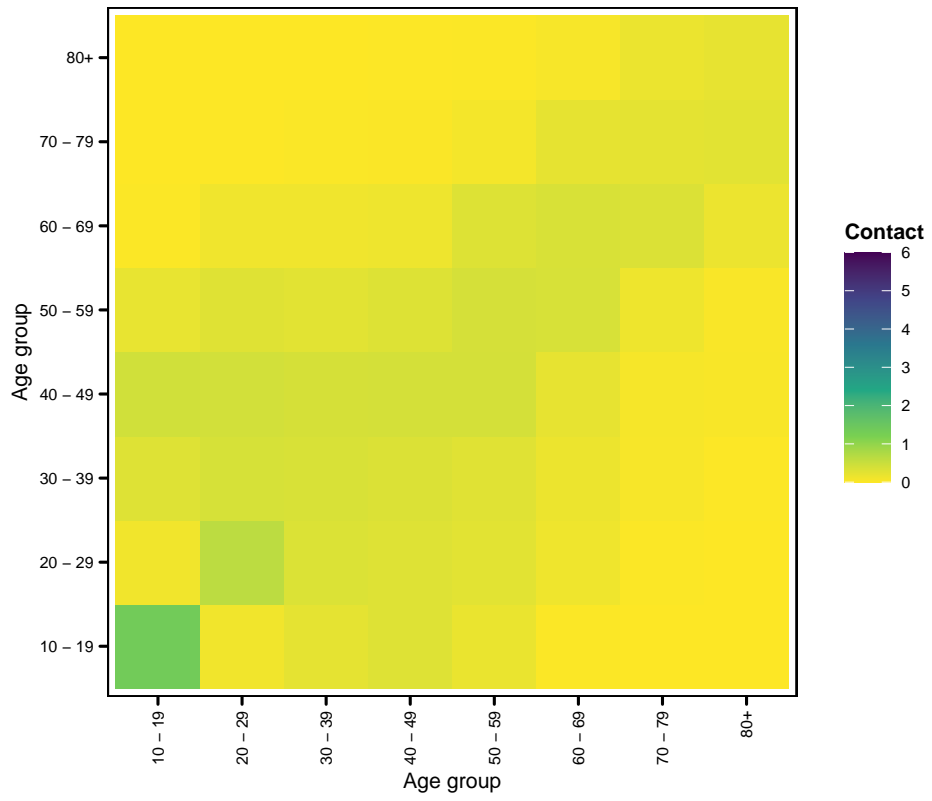

27

```
##
```

```
## [[8]]
```

### 2021-07

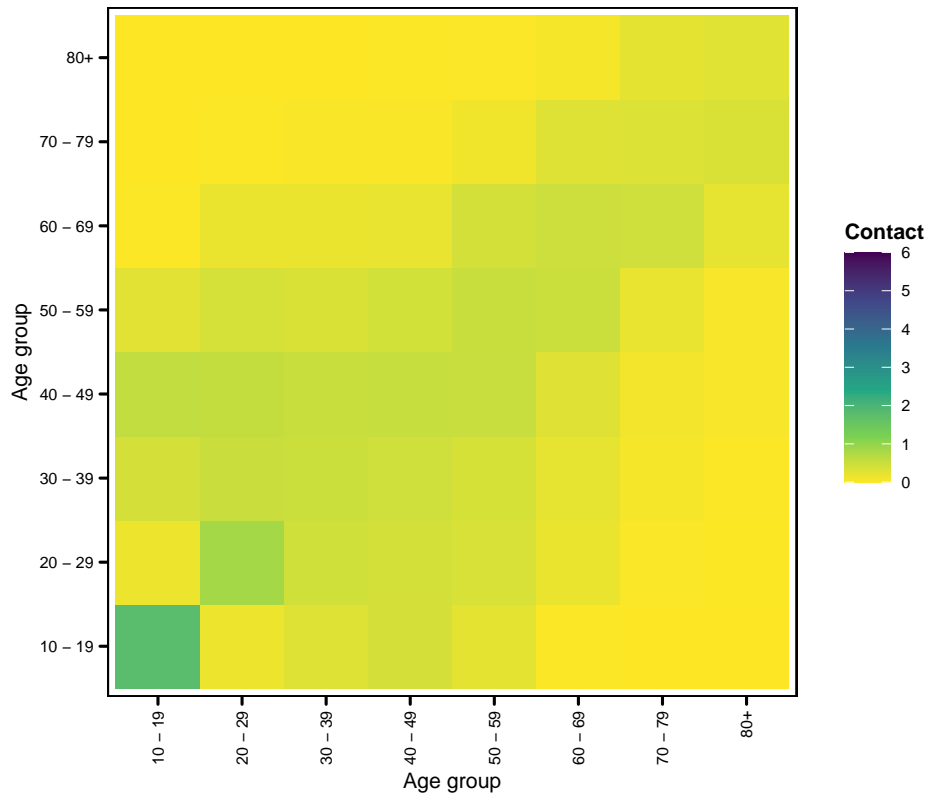

28

```
##
```

```
## [[9]]
```

### 2021-08

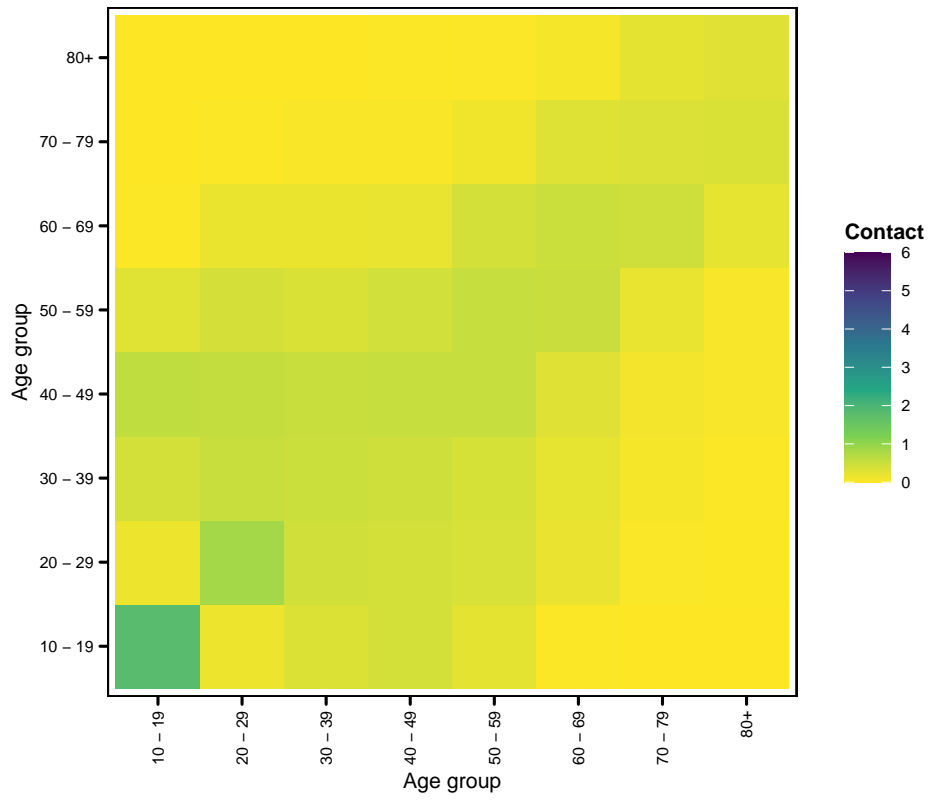

29

```
##  
## [[10]]
```

### 2021-09

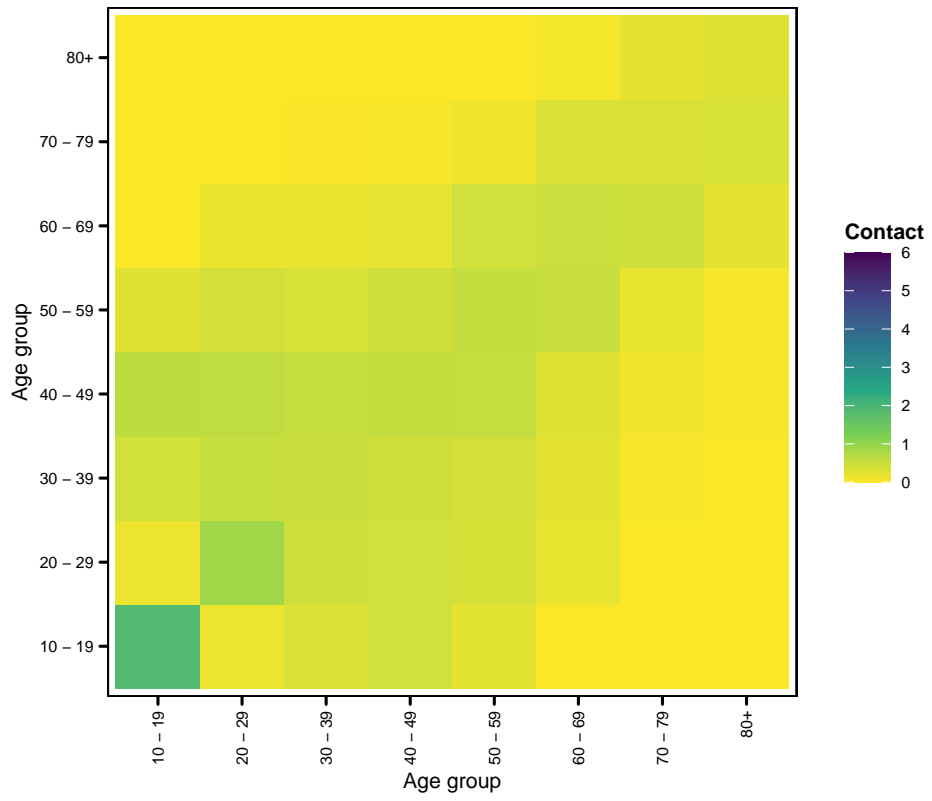

30

```
##  
## [[11]]
```

### 2021-10

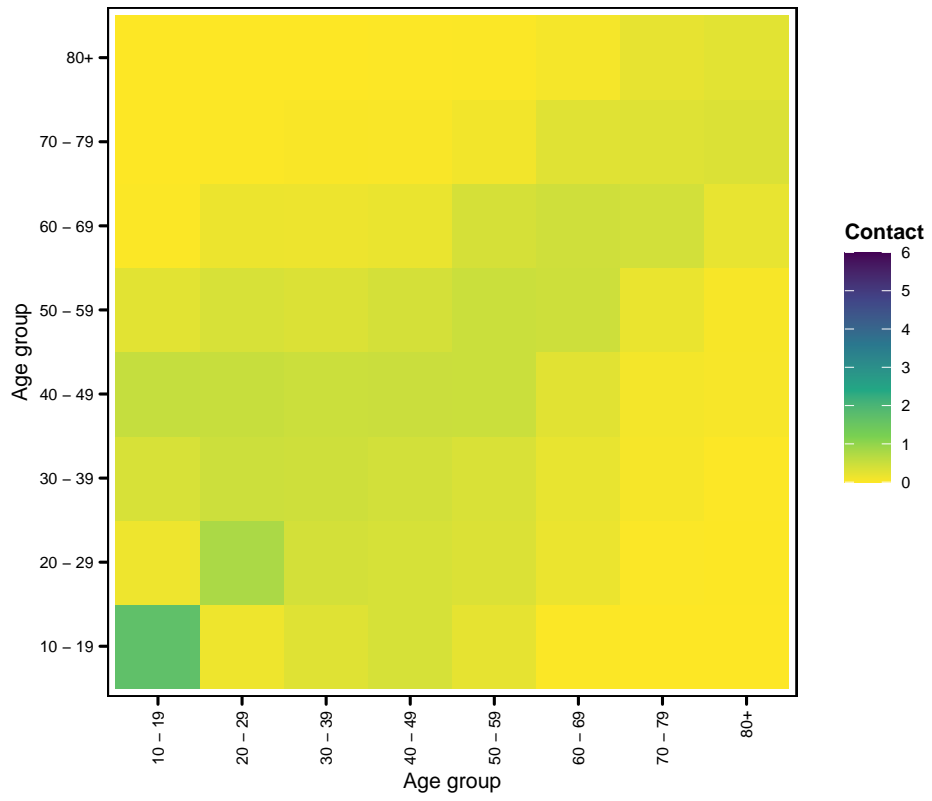

31

```
##  
## [[12]]
```



### 2021-11

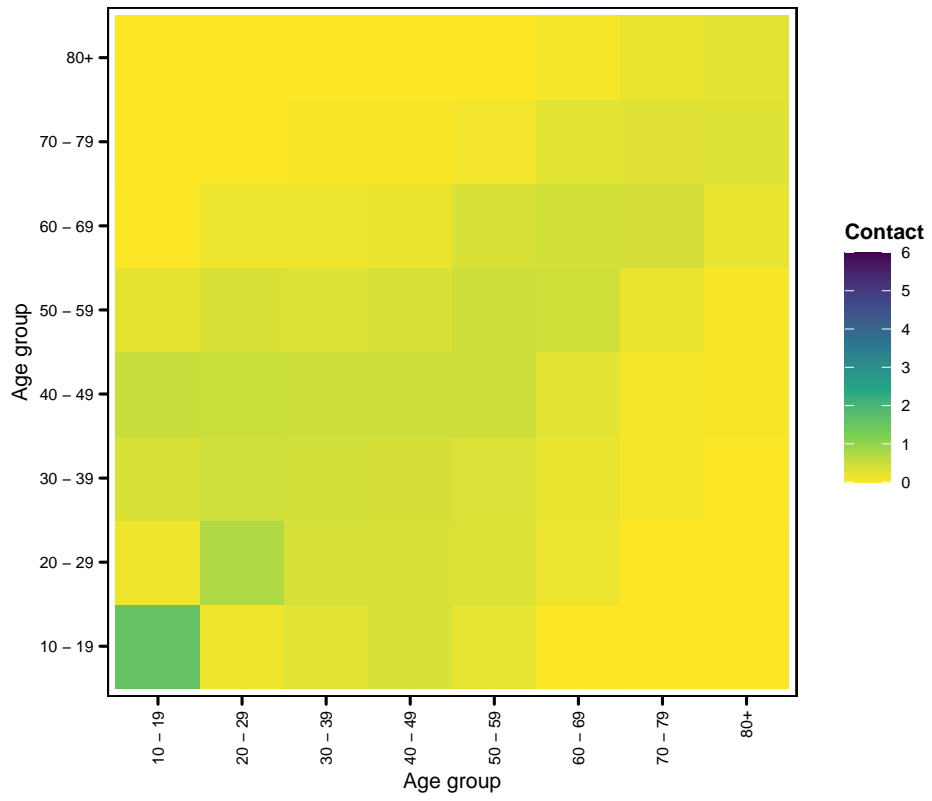

32

```
##  
## [[13]]
```

### 2021-12

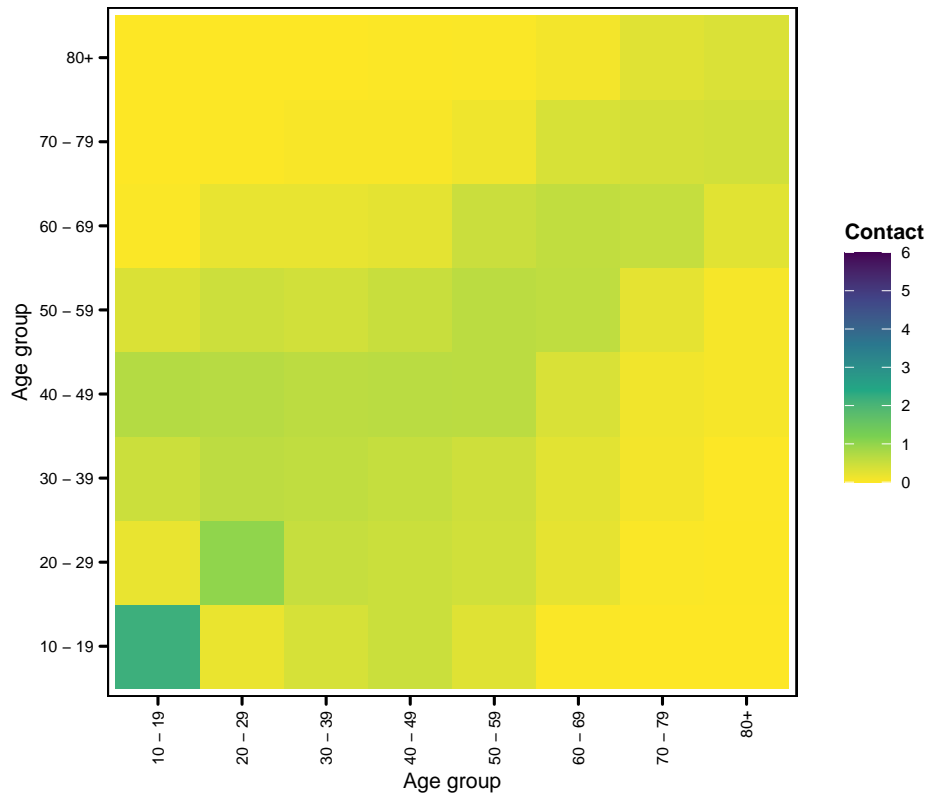

33

```
##  
## [[14]]
```

### 2021-13

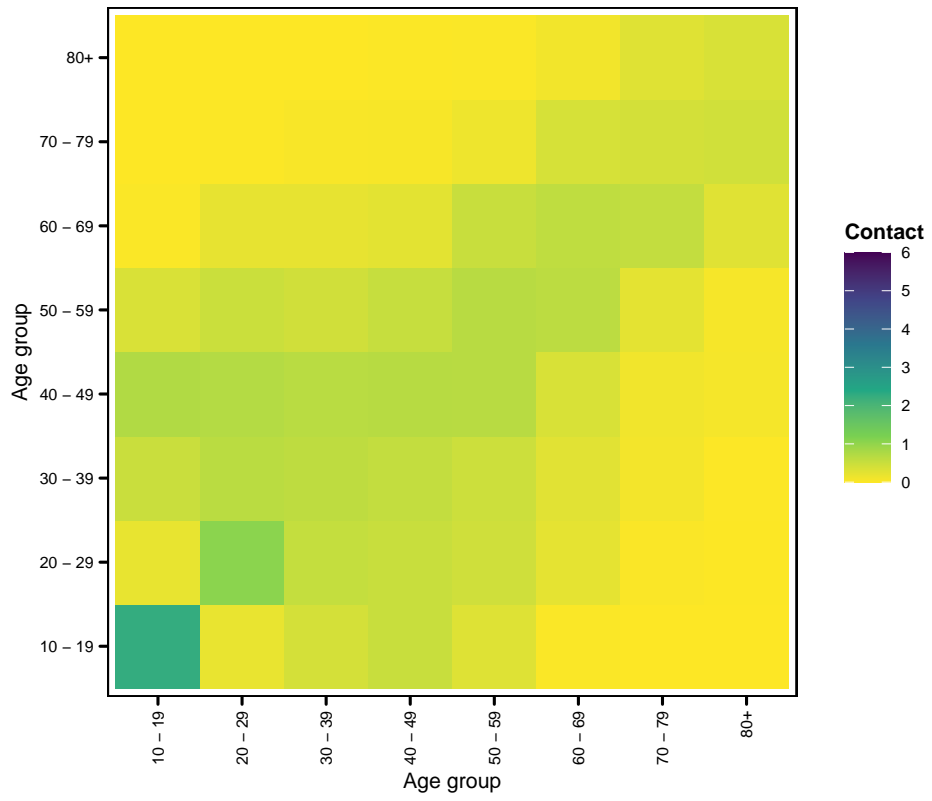

34

```
##  
## [[15]]
```

### 2021-14

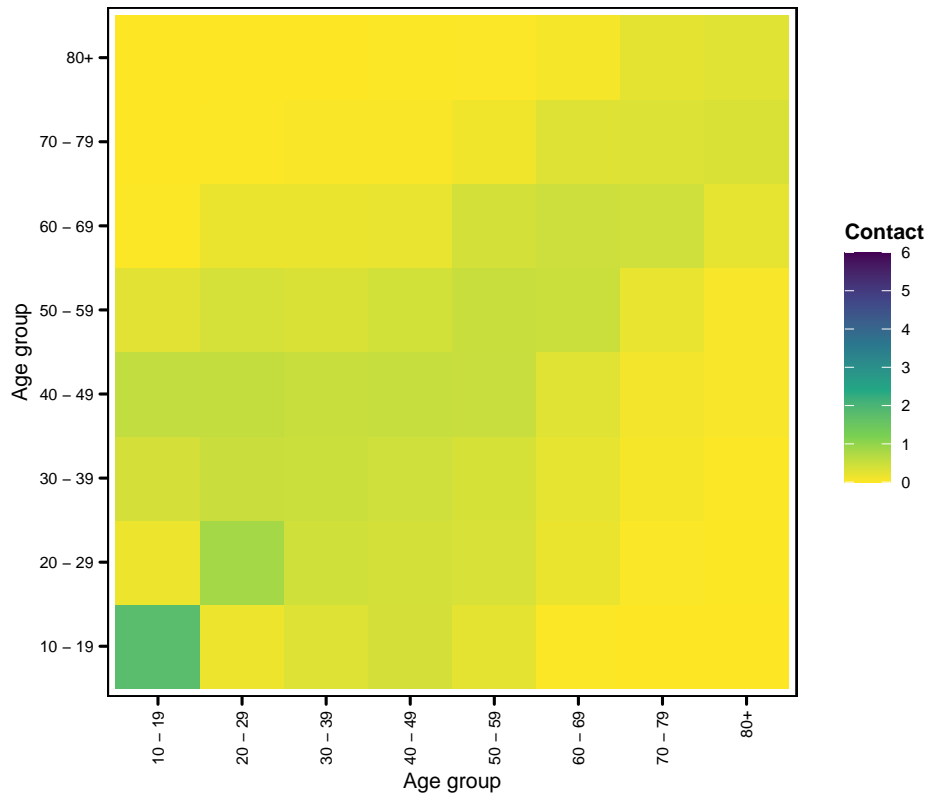

35

```
##  
## [[16]]
```

### 2021-15



36

```
##  
## [[17]]
```

### 2021-16

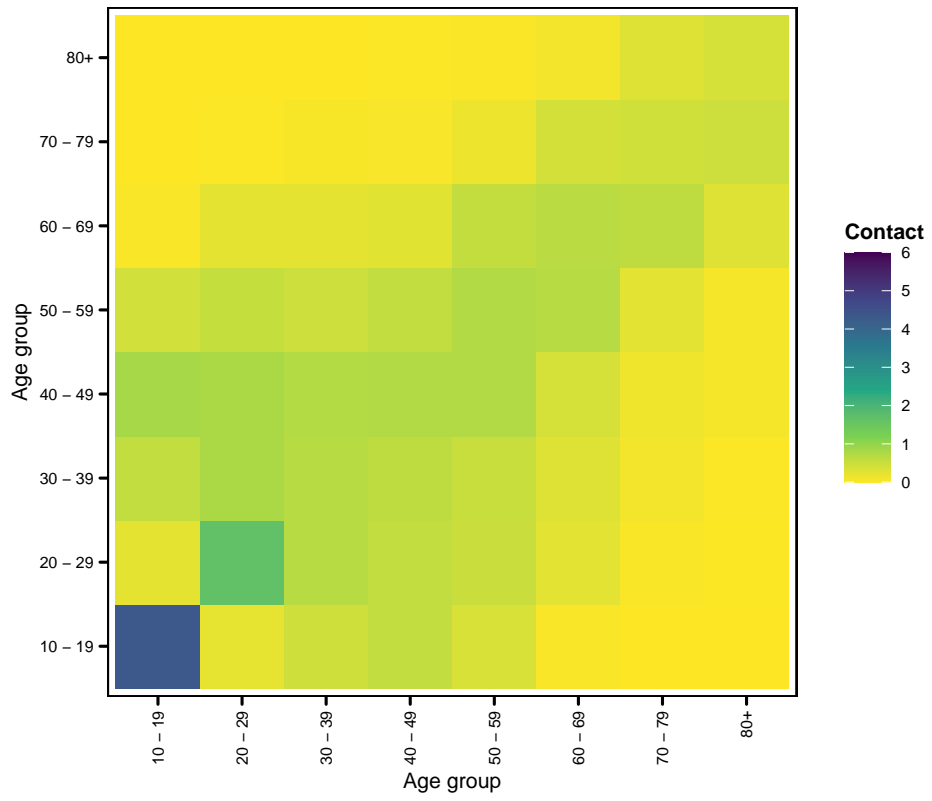

37

```
##  
## [[18]]
```

### 2021-17

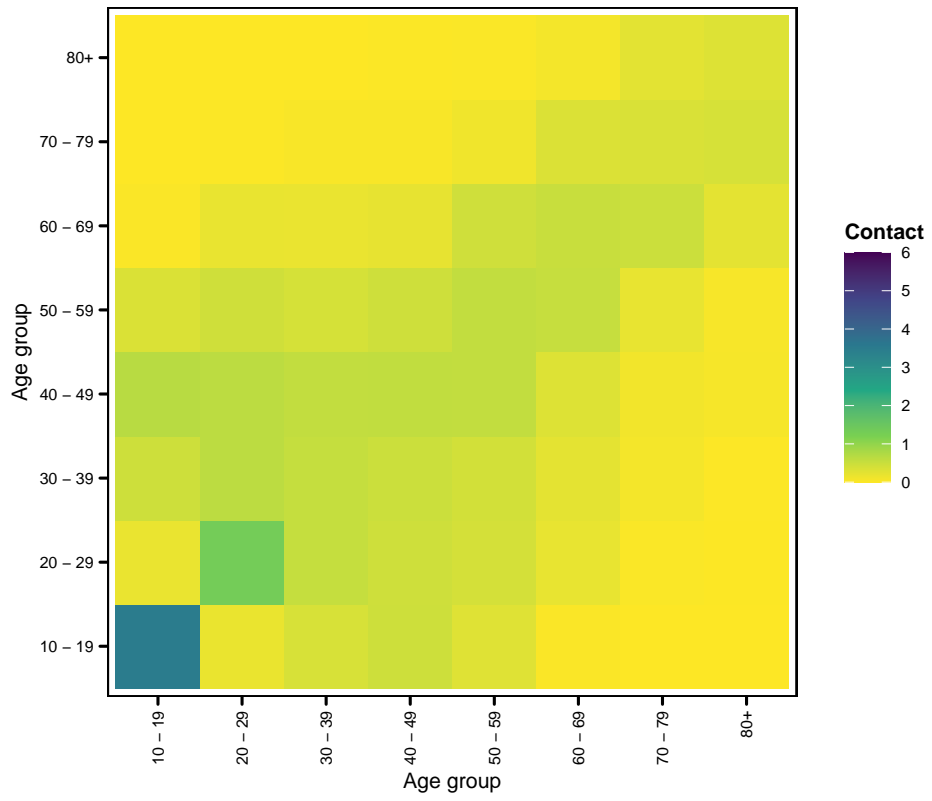

38

```
##  
## [[19]]
```

### 2021-18

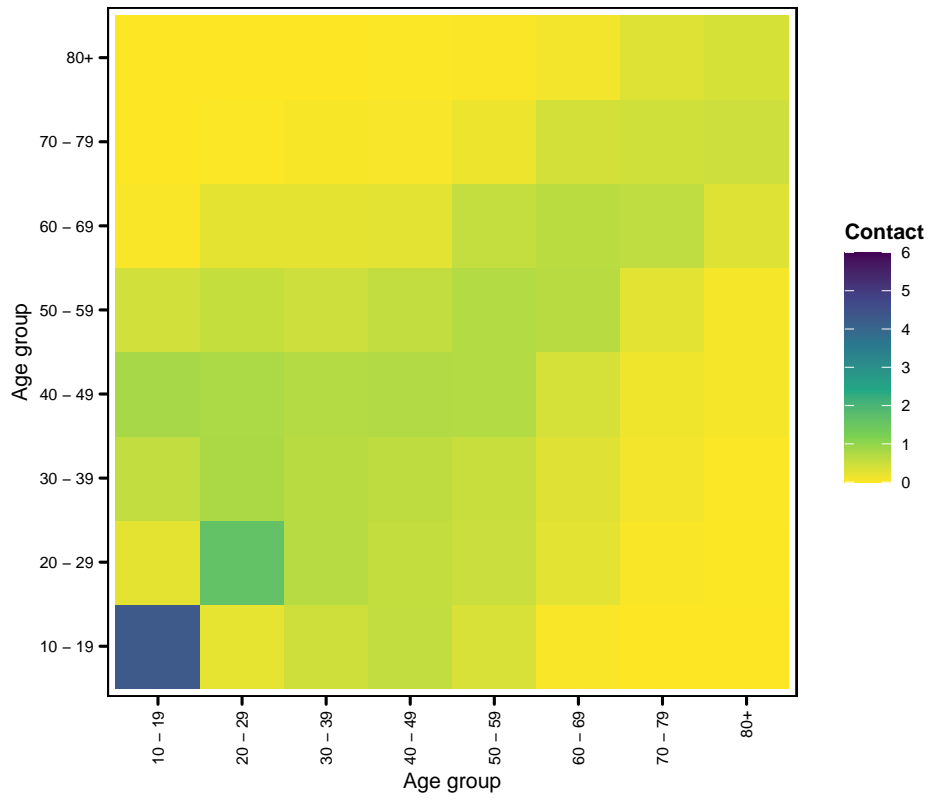

39

##

## [[20]]



### 2021-19

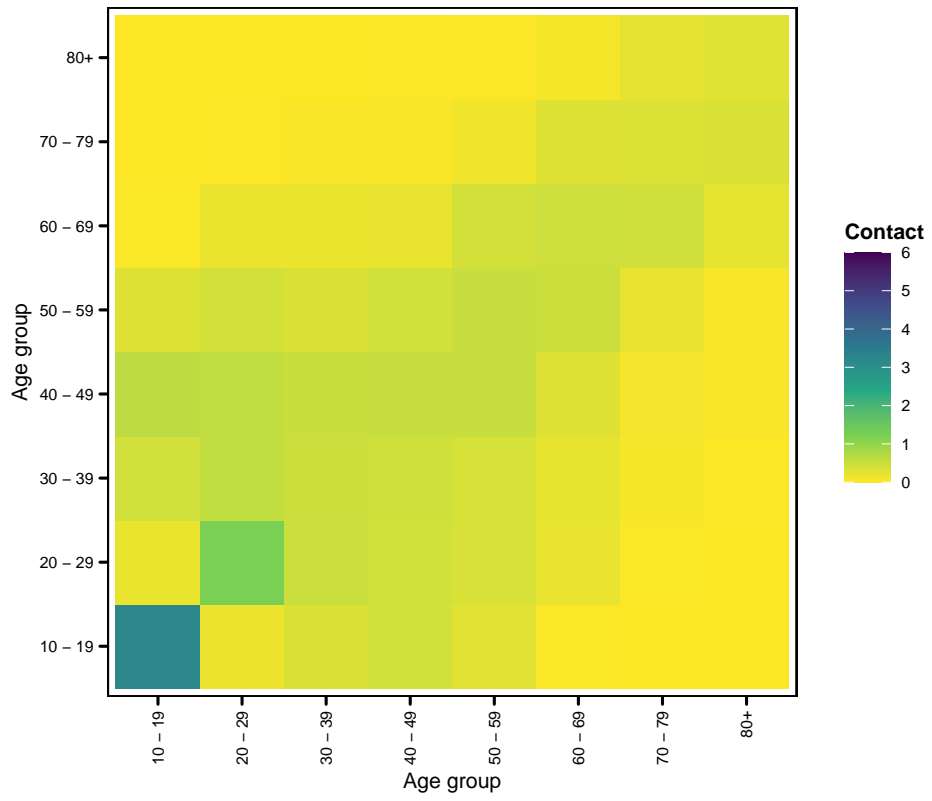

40

```
##  
## [[21]]
```

### 2021-20

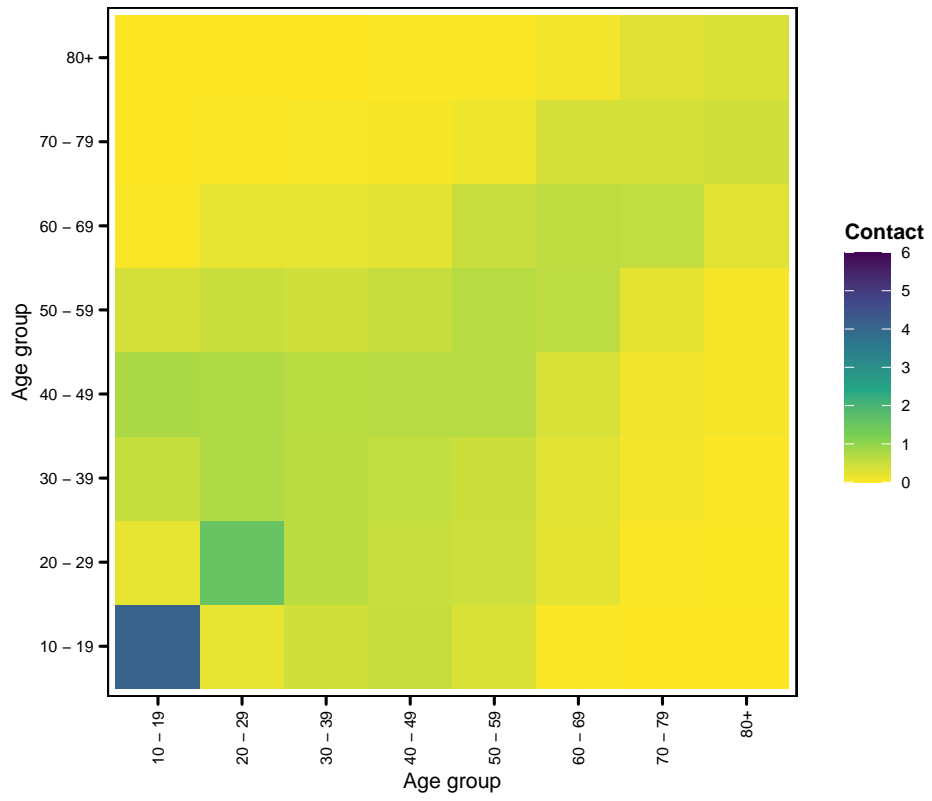

41

```
##
```

```
## [[22]]
```

### 2021-21

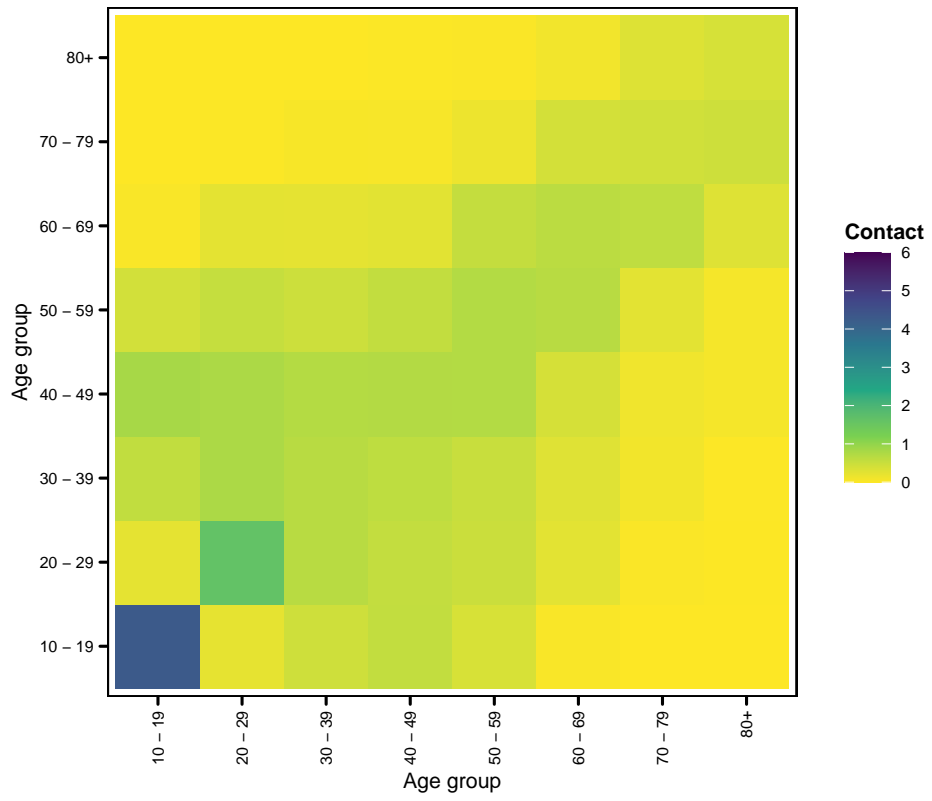

42

##

## [[23]]

### 2021-22

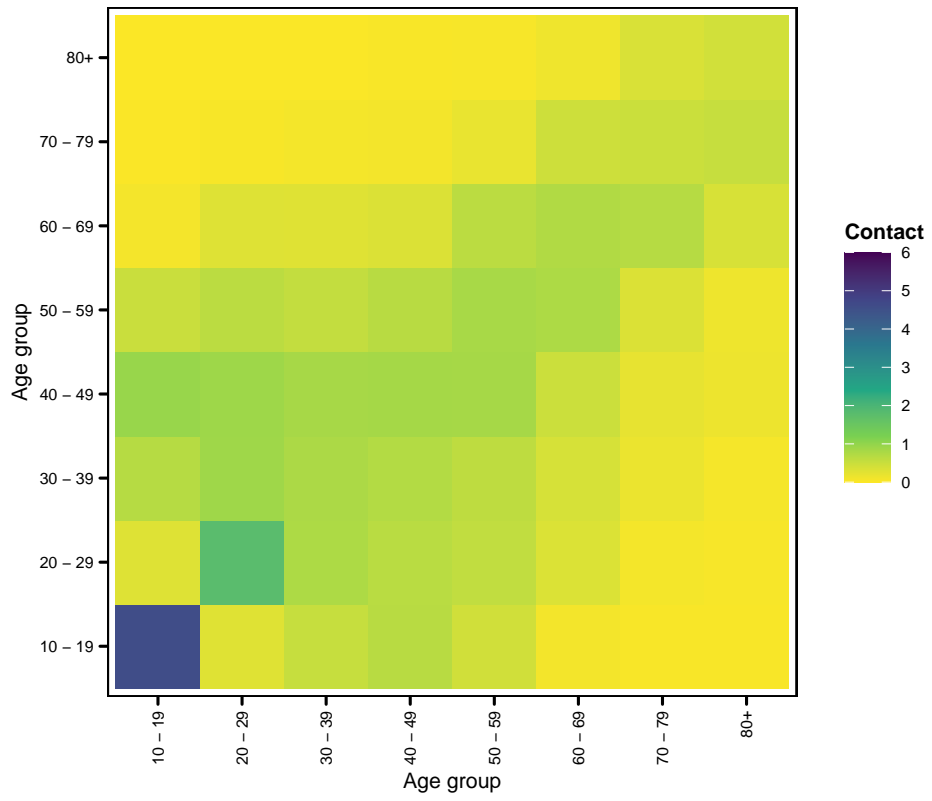

43

```
##
```

```
## [[24]]
```

### 2021-23

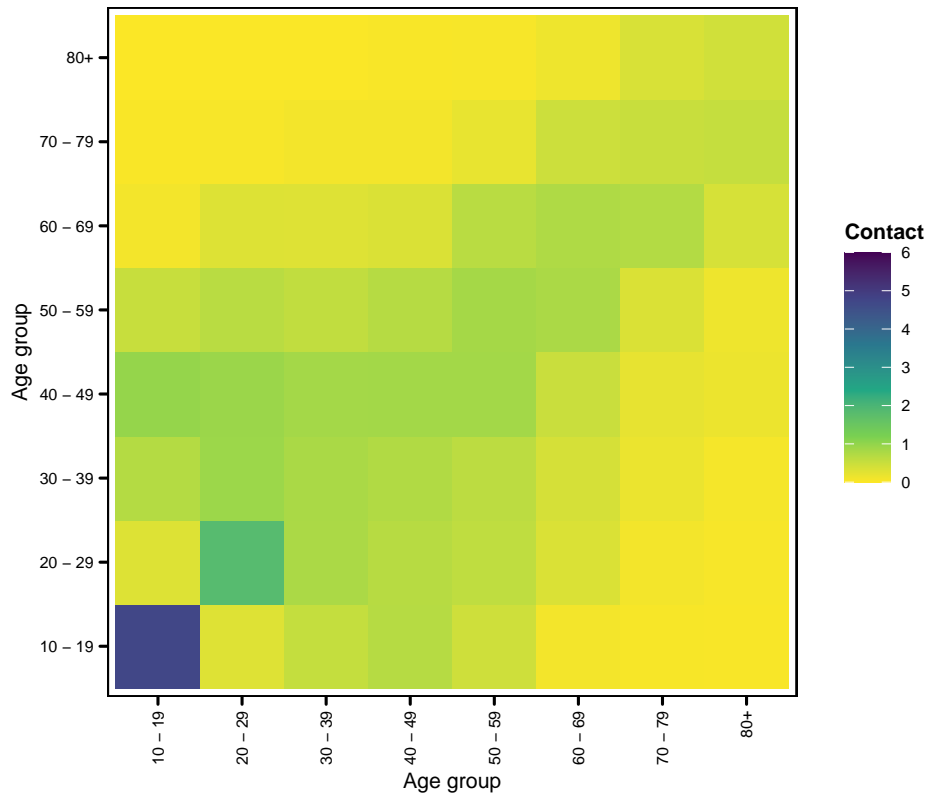

44

##

## [[25]]

### 2021-24

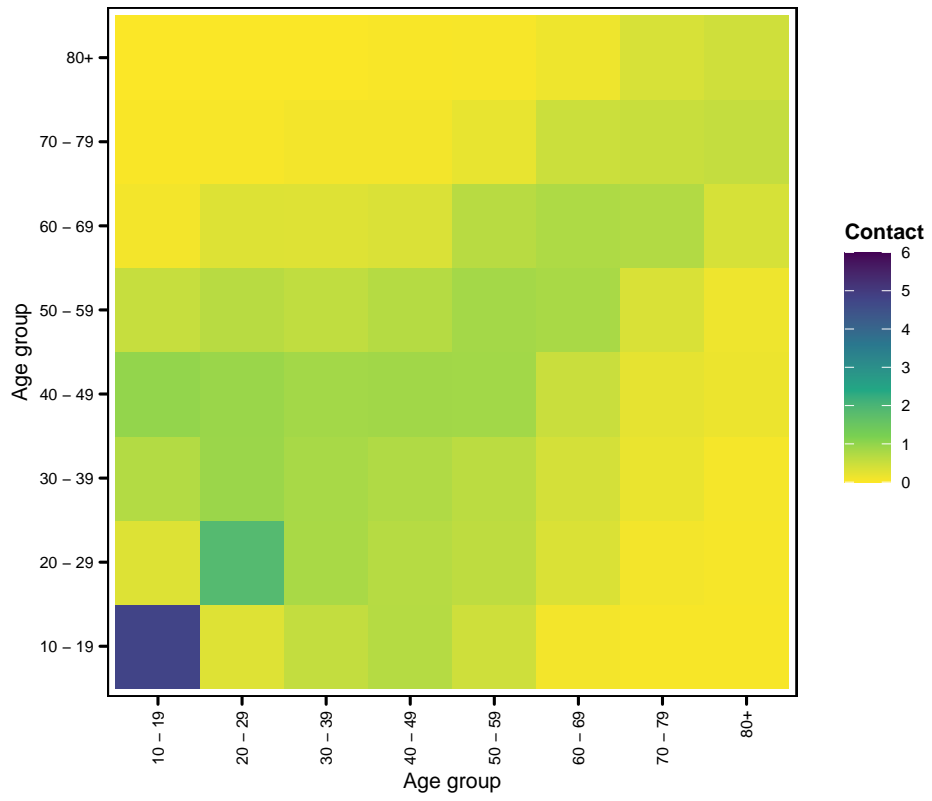

45

```
##
```

```
## [[26]]
```

### 2021-25

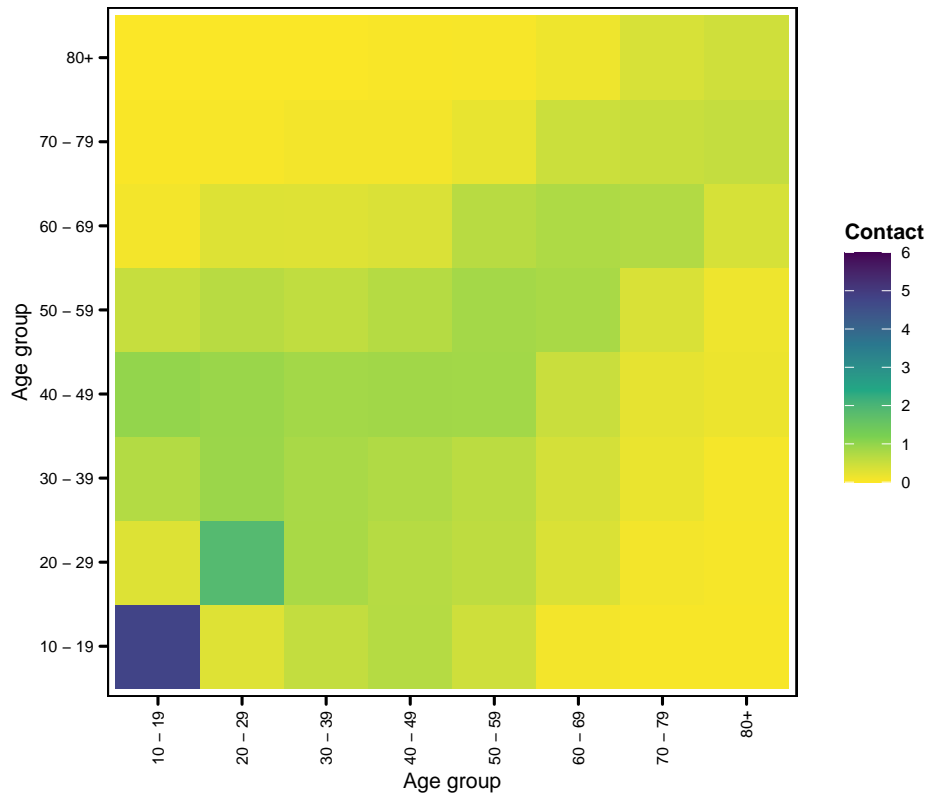

46

```
##
```

```
## [[27]]
```

### 2021-26

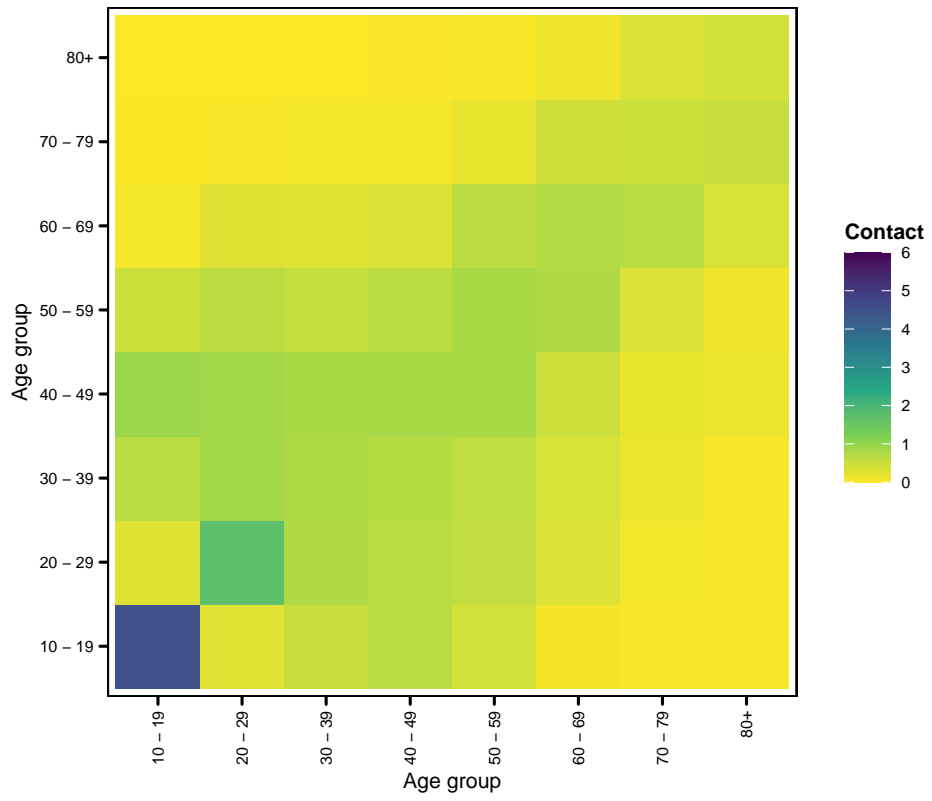

47

##

## [[28]]



### 2021-27

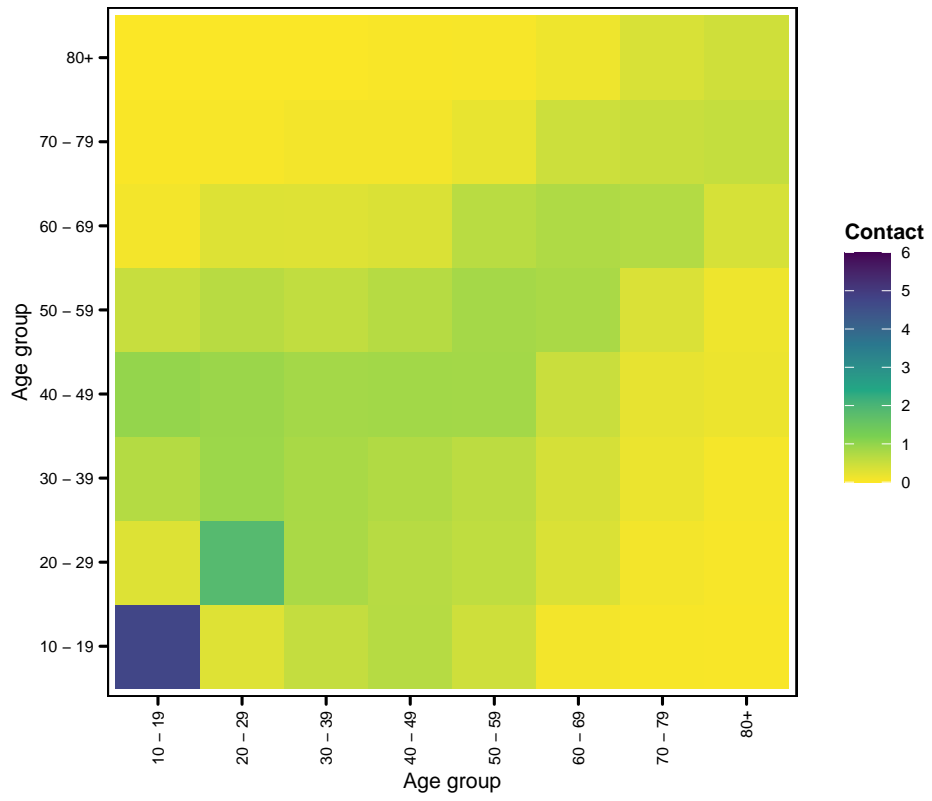

48

##

## [[29]]

### 2021-28

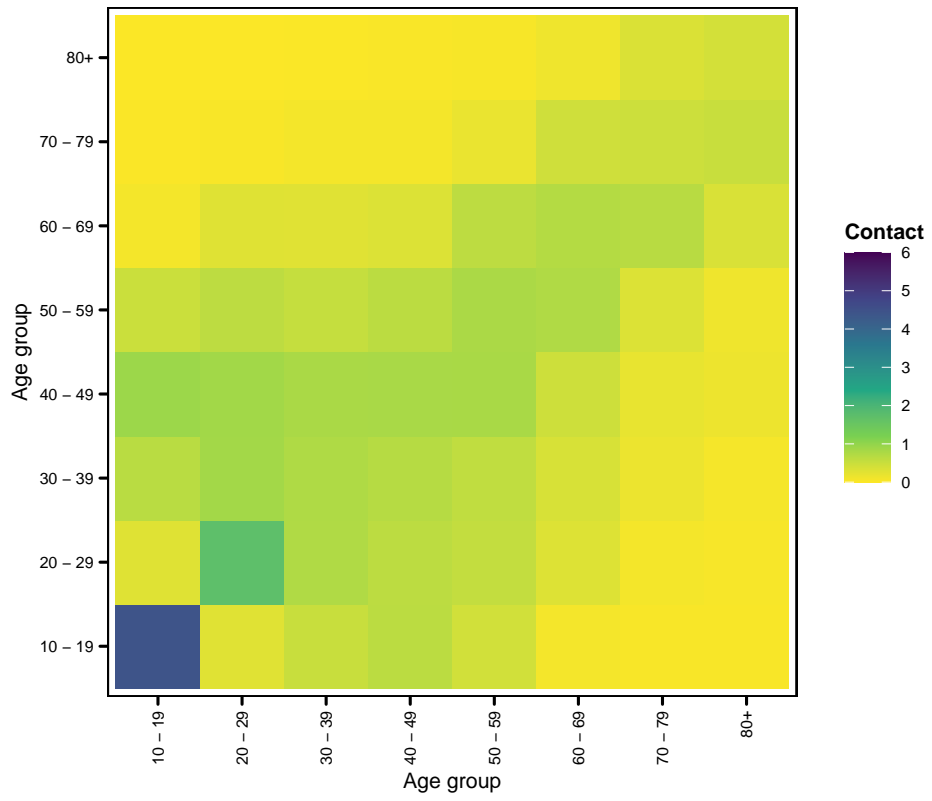

49

```
##
```

```
## [[30]]
```

### 2021-29

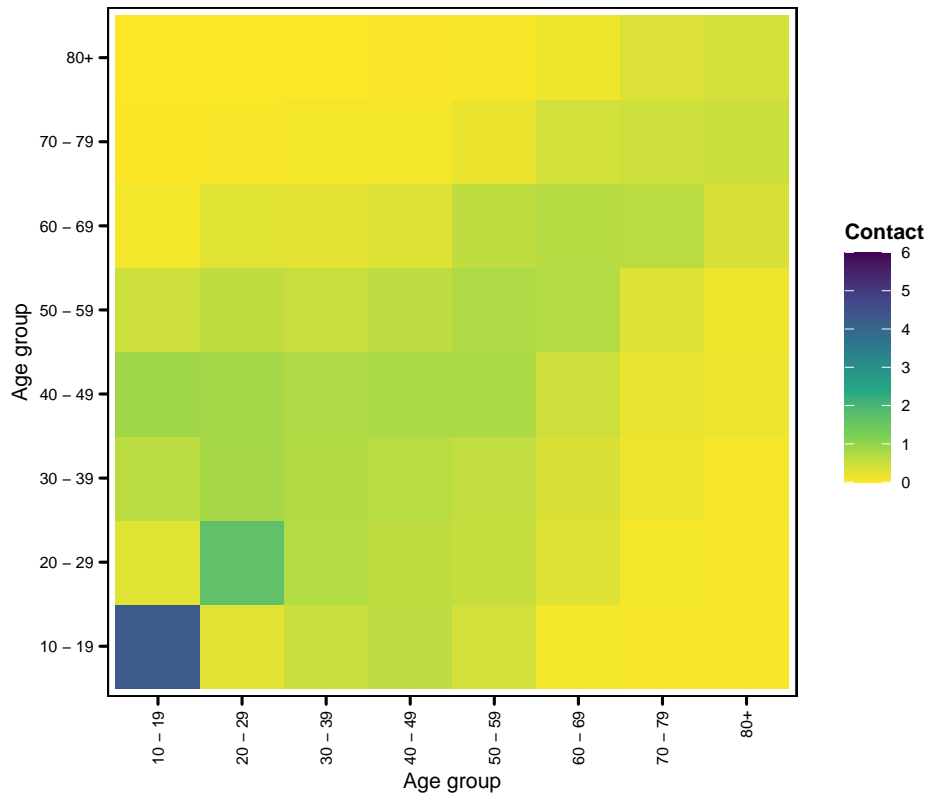

50

```
##  
## [[31]]
```

### 2021-30

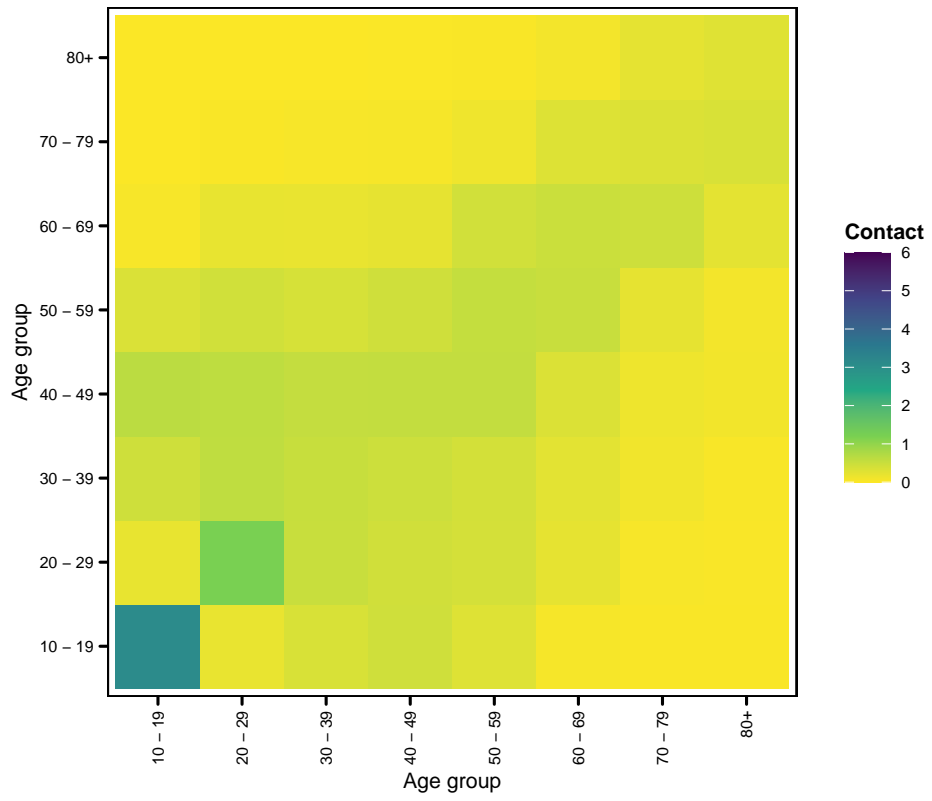

51

```
##  
## [[32]]
```

### 2021-31

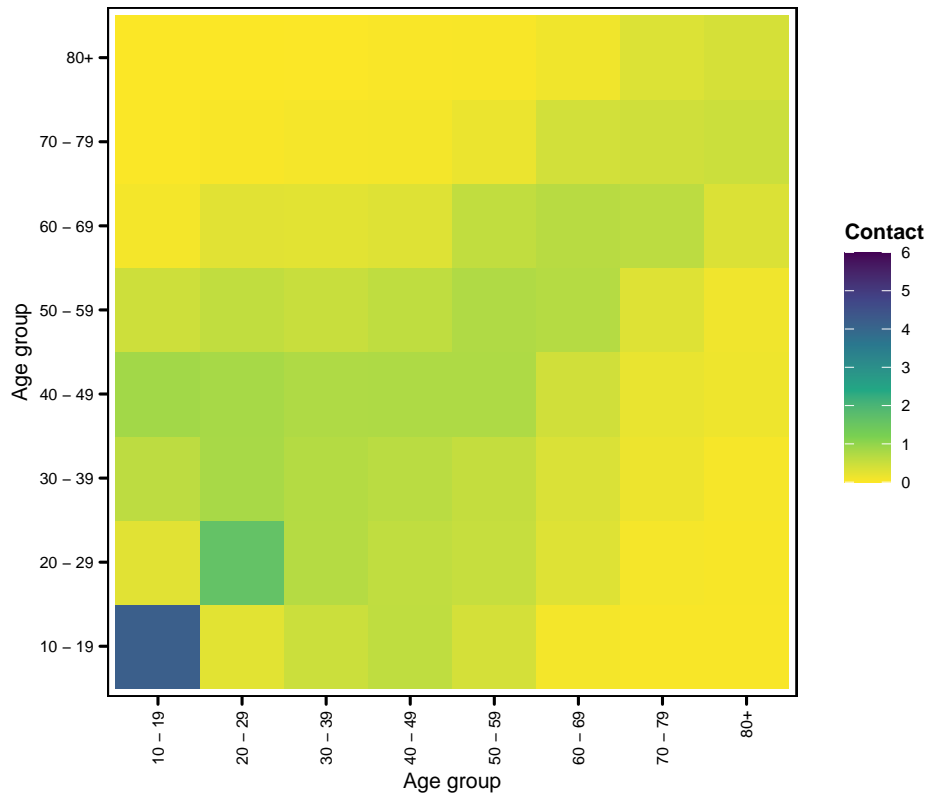

52

```
##
```

```
## [[33]]
```

### 2021-32

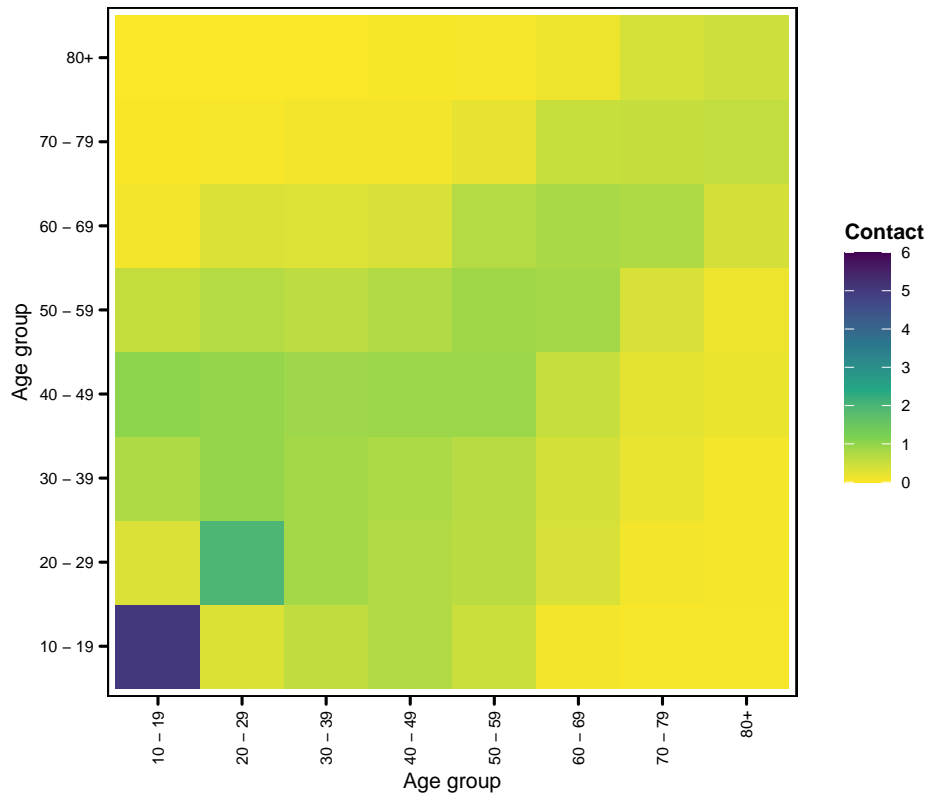

53

```
##
```

```
## [[34]]
```

### 2021-33

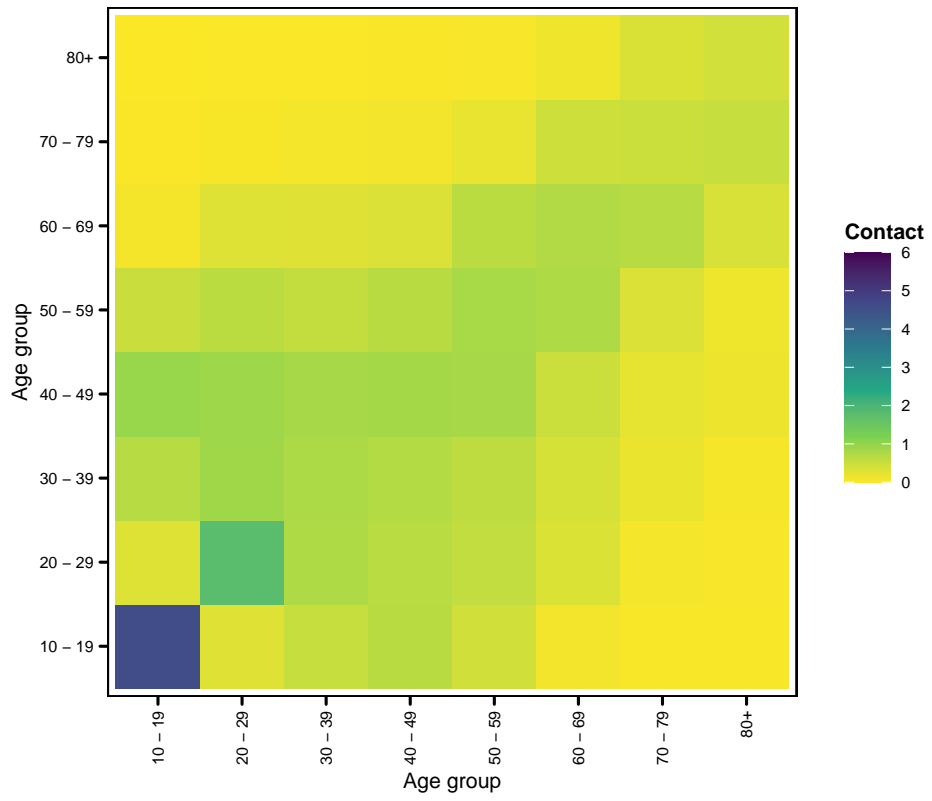

54

```
##
```

```
## [[35]]
```

### 2021-34

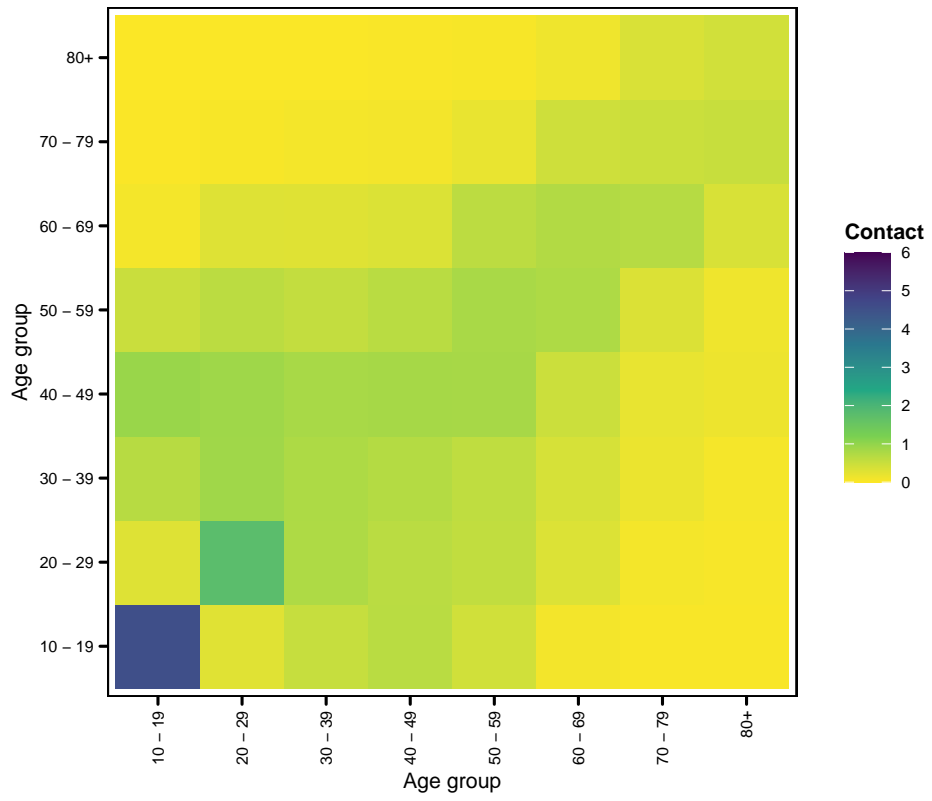

55

```
##  
## [[36]]
```



### 2021-35

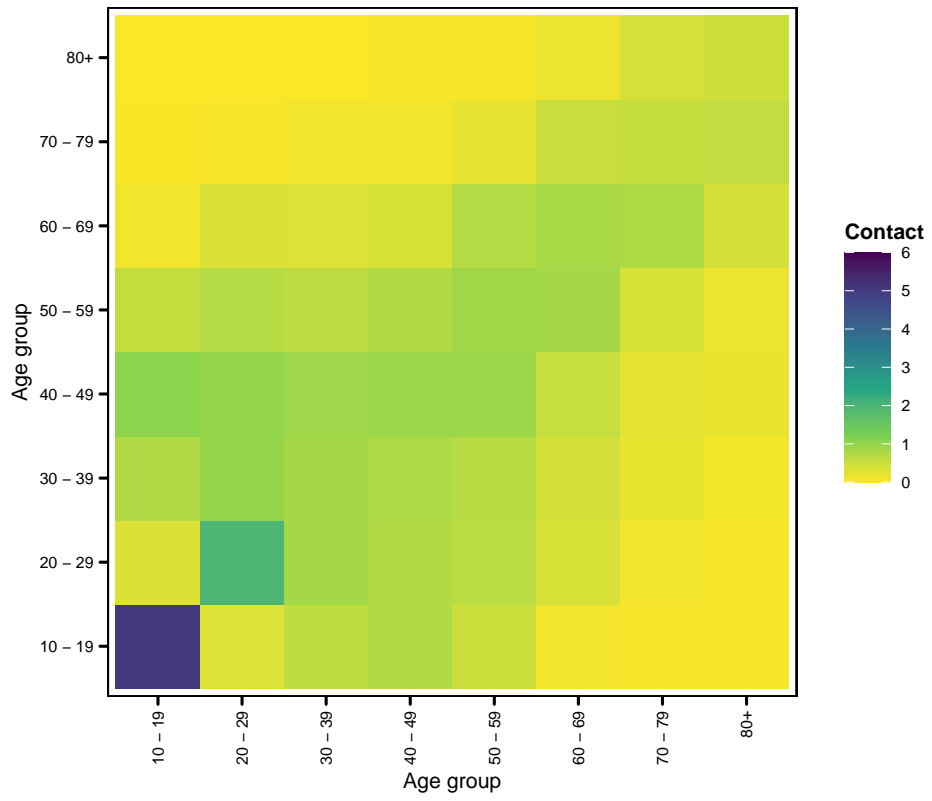

56

```
##
```

```
## [[37]]
```

### 2021-36

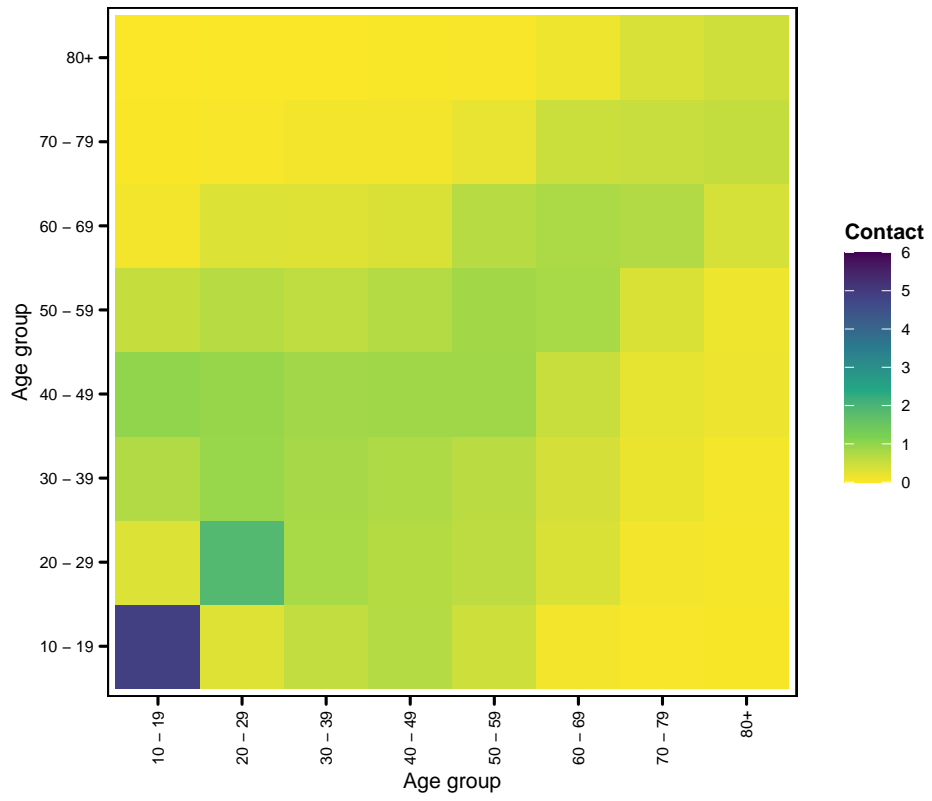

57

```
##
```

```
## [[38]]
```

### 2021-37

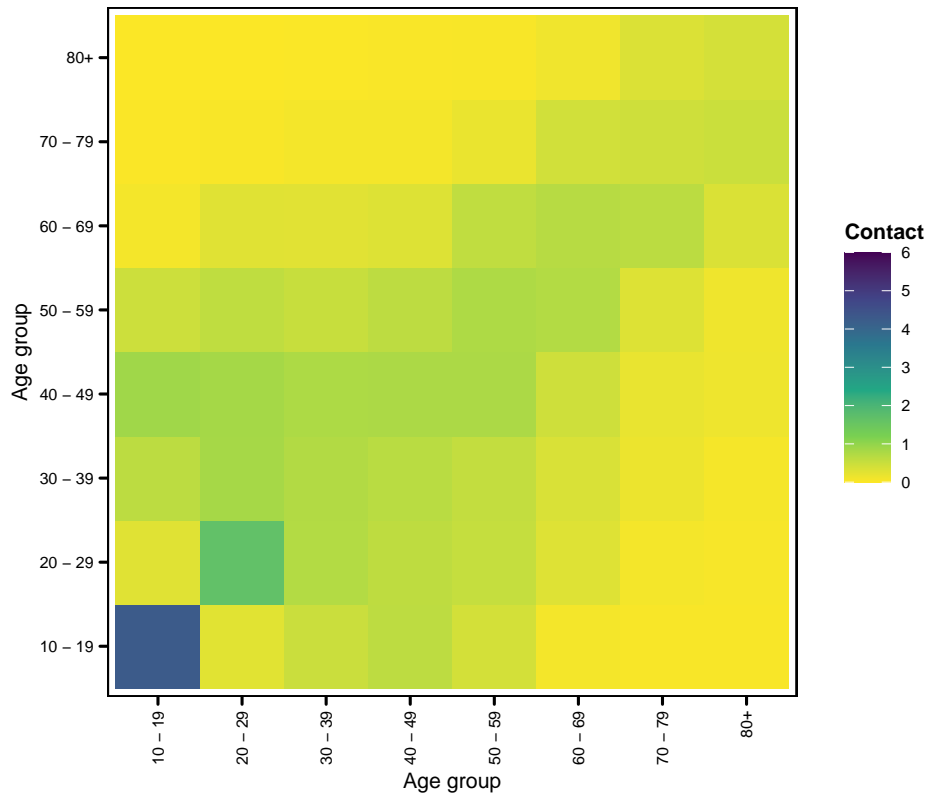

58

```
##
```

```
## [[39]]
```

### 2021-38

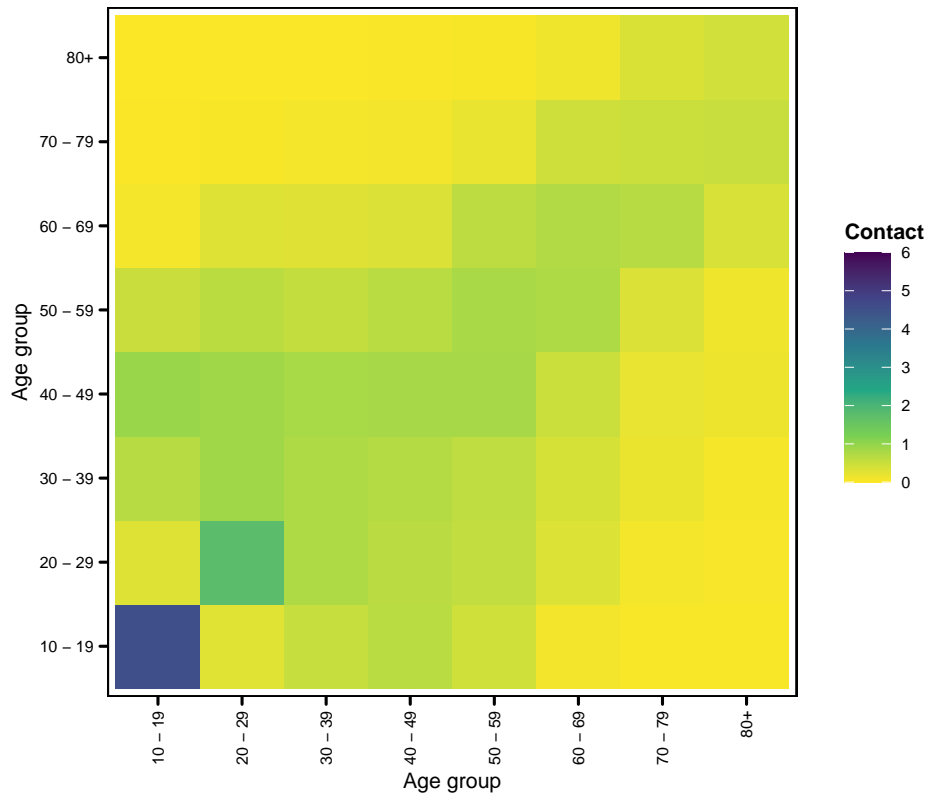

59

```
##
```

```
## [[40]]
```

### 2021-39

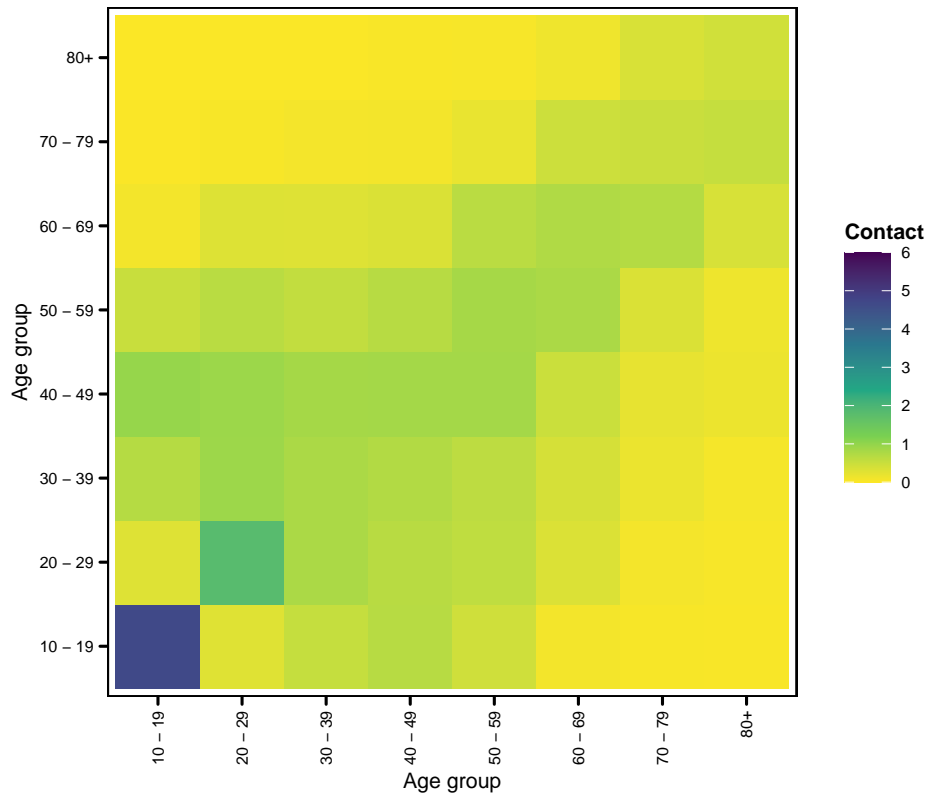

60

```
##  
## [[41]]
```

### 2021-40

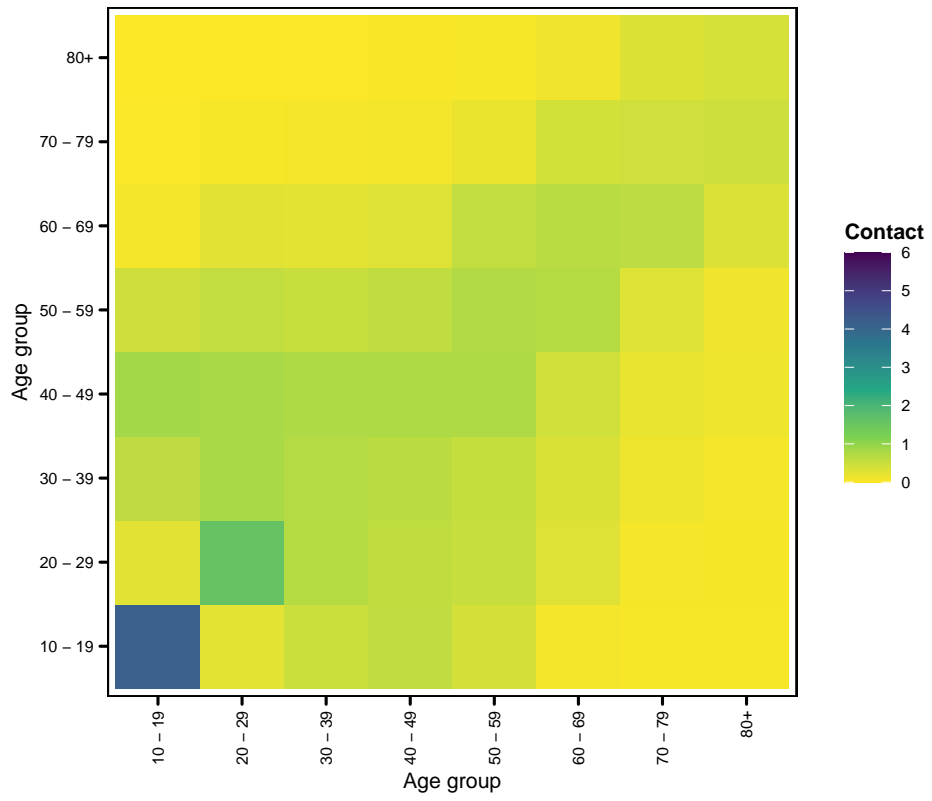

61

```
##
```

```
## [[42]]
```

### 2021-41

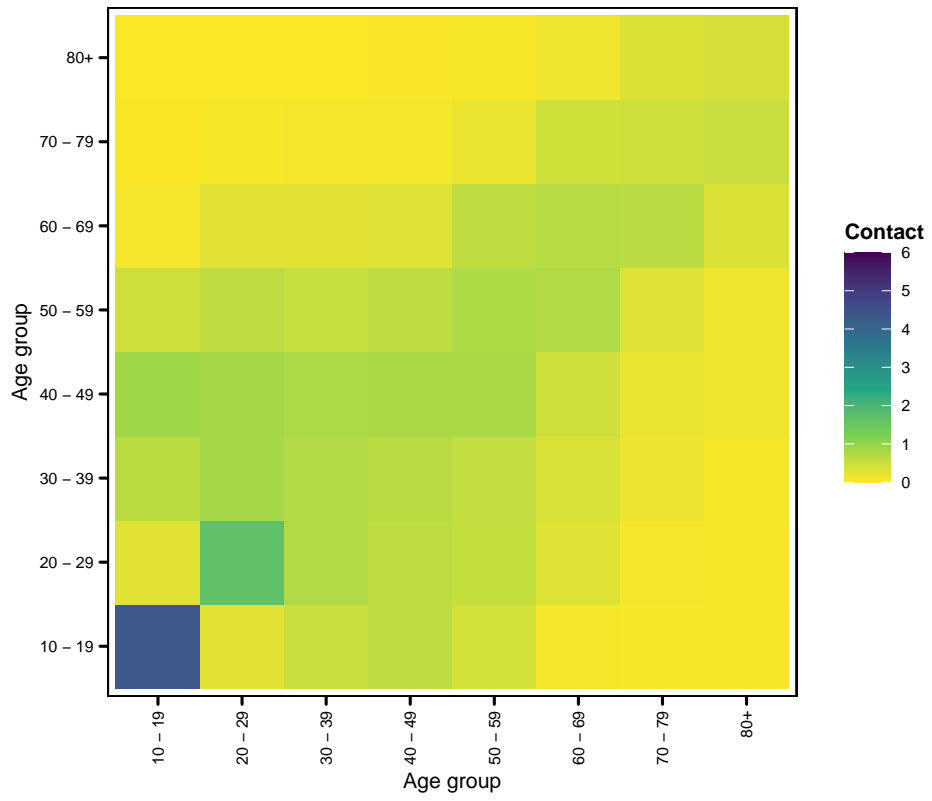

62

```
##
```

```
## [[43]]
```

### 2021-42

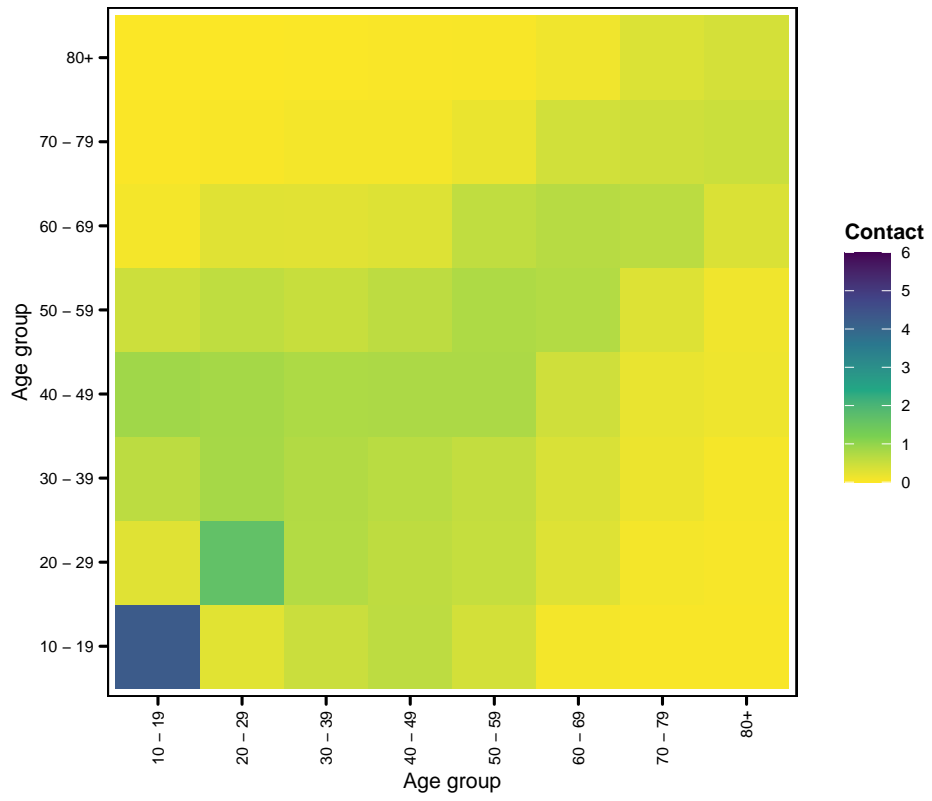

63

```
##
```

```
## [[44]]
```



### 2021-43

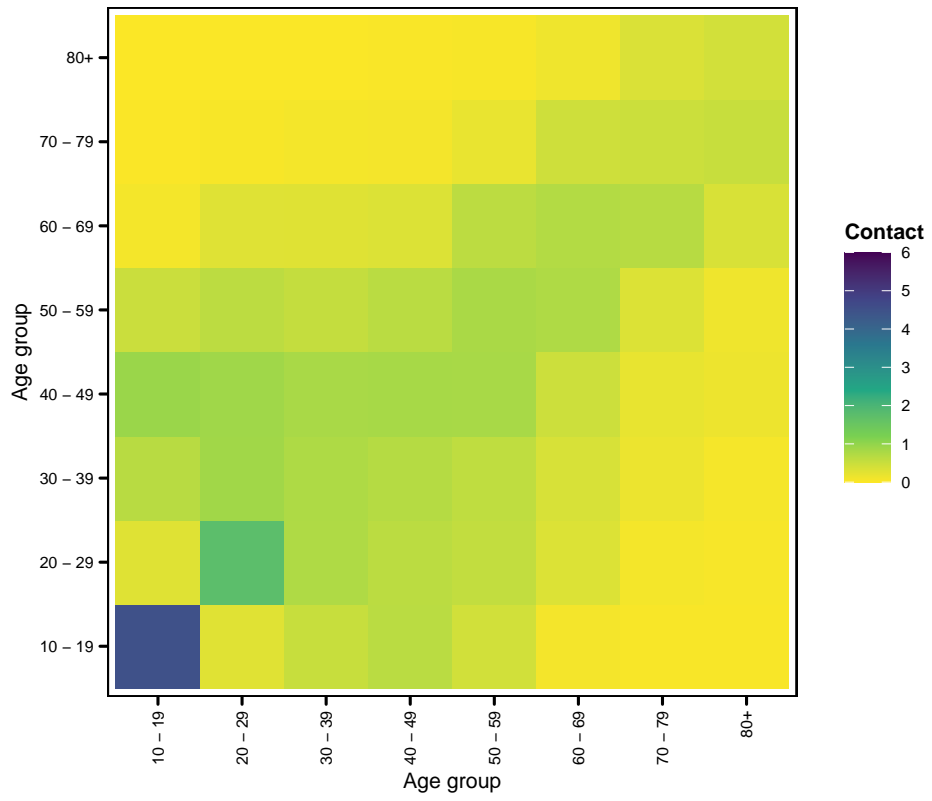

64

```
##
```

```
## [[45]]
```

### 2021-44

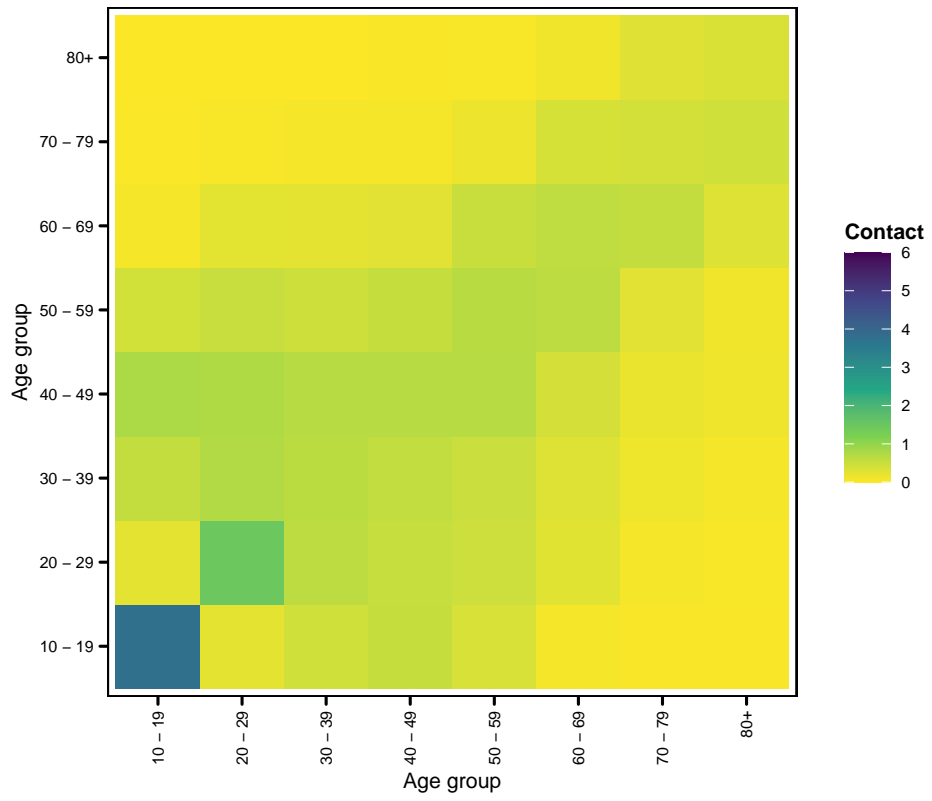

65

```
##
```

```
## [[46]]
```

### 2021-45

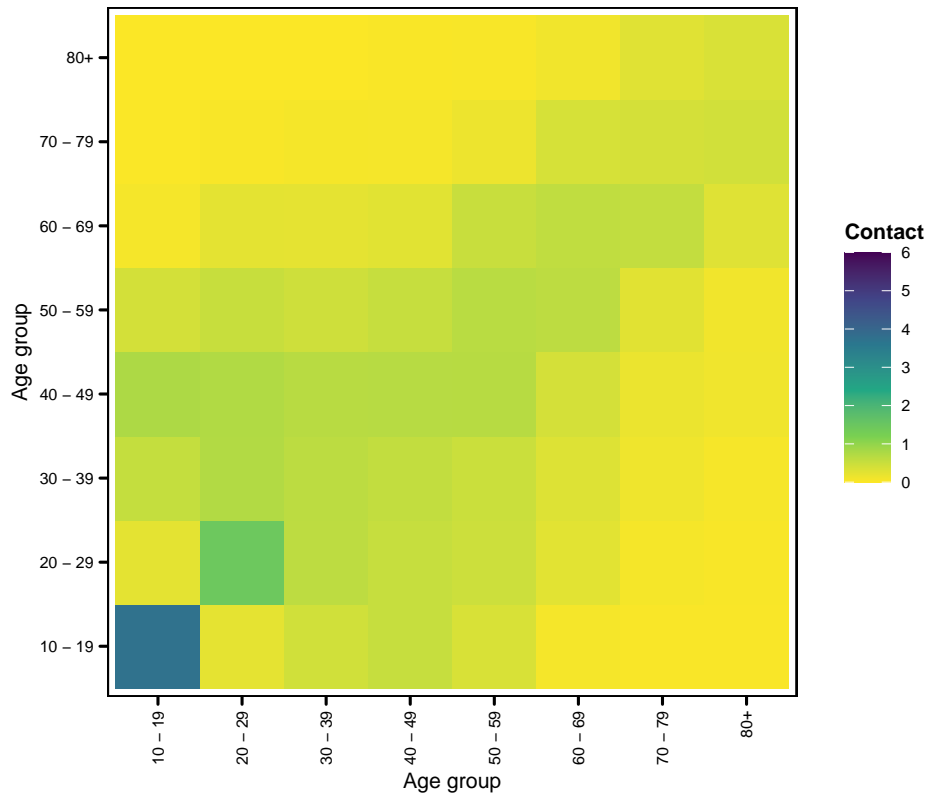

66

```
##  
## [[47]]
```

### 2021-46

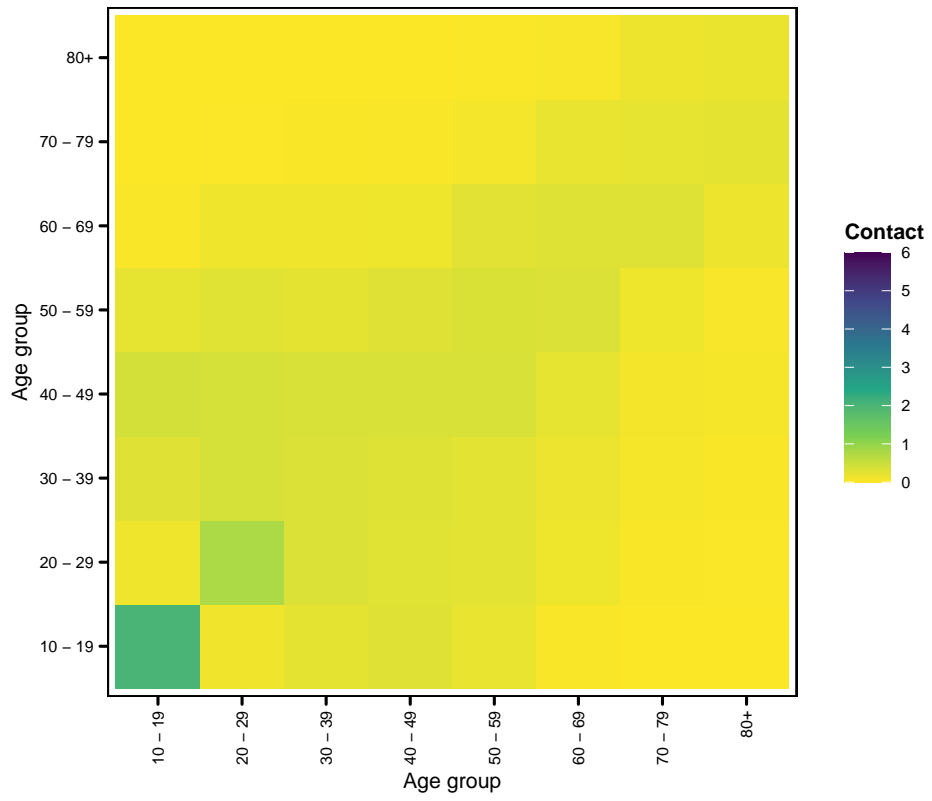

67

```
##
```

```
## [[48]]
```

### 2021-47

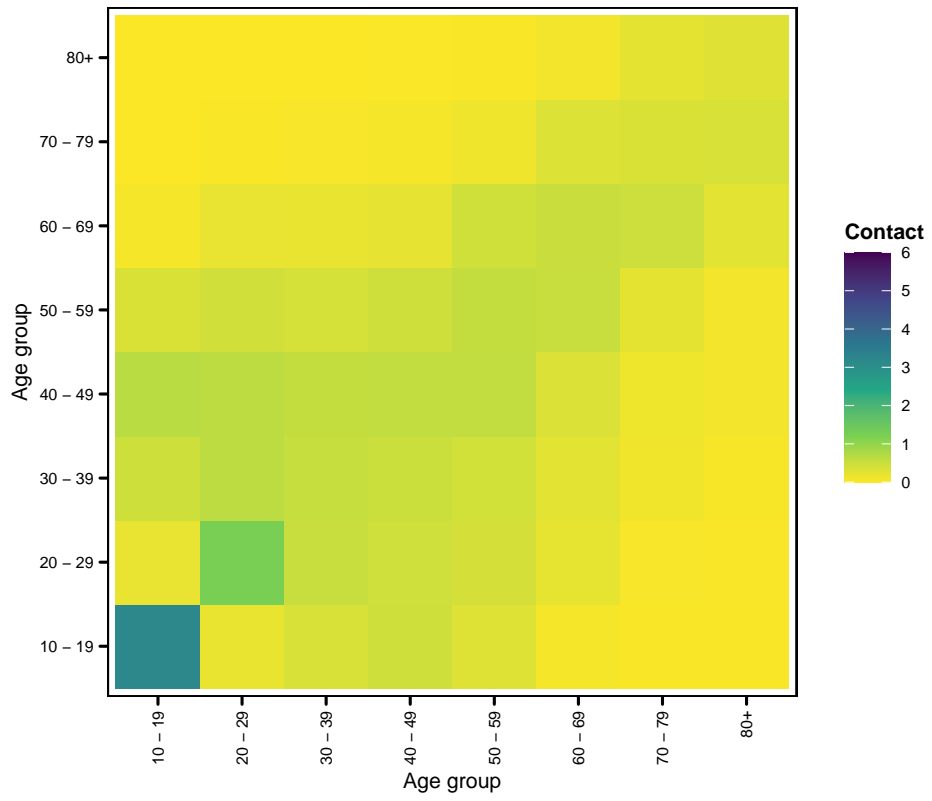

68

```
##
```

```
## [[49]]
```

### 2021-48

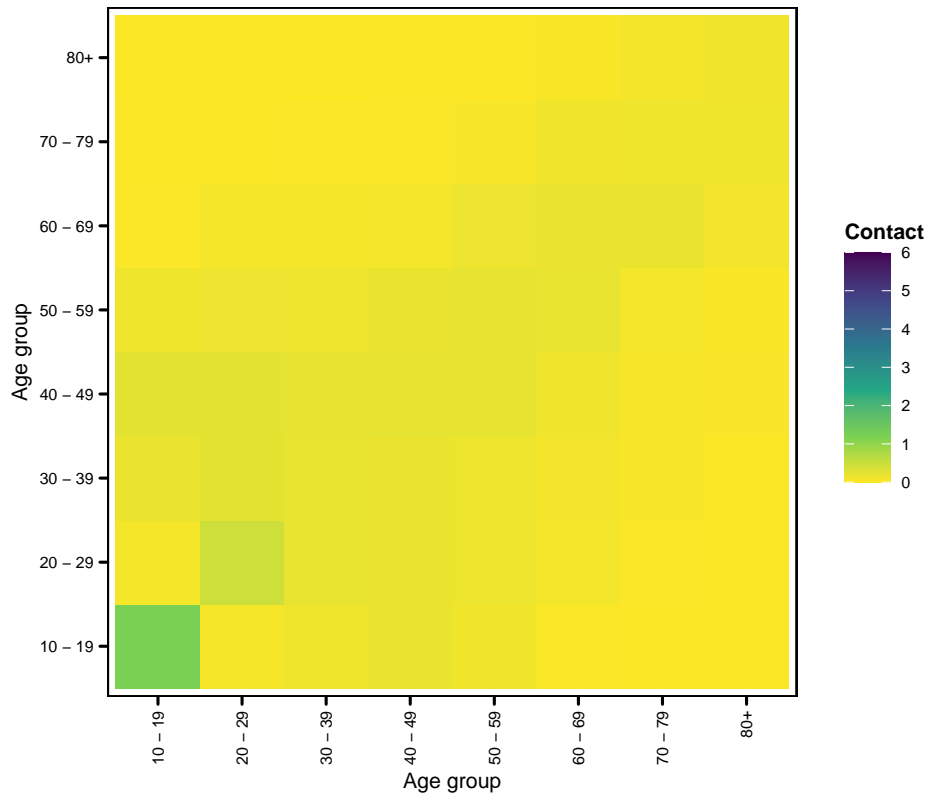

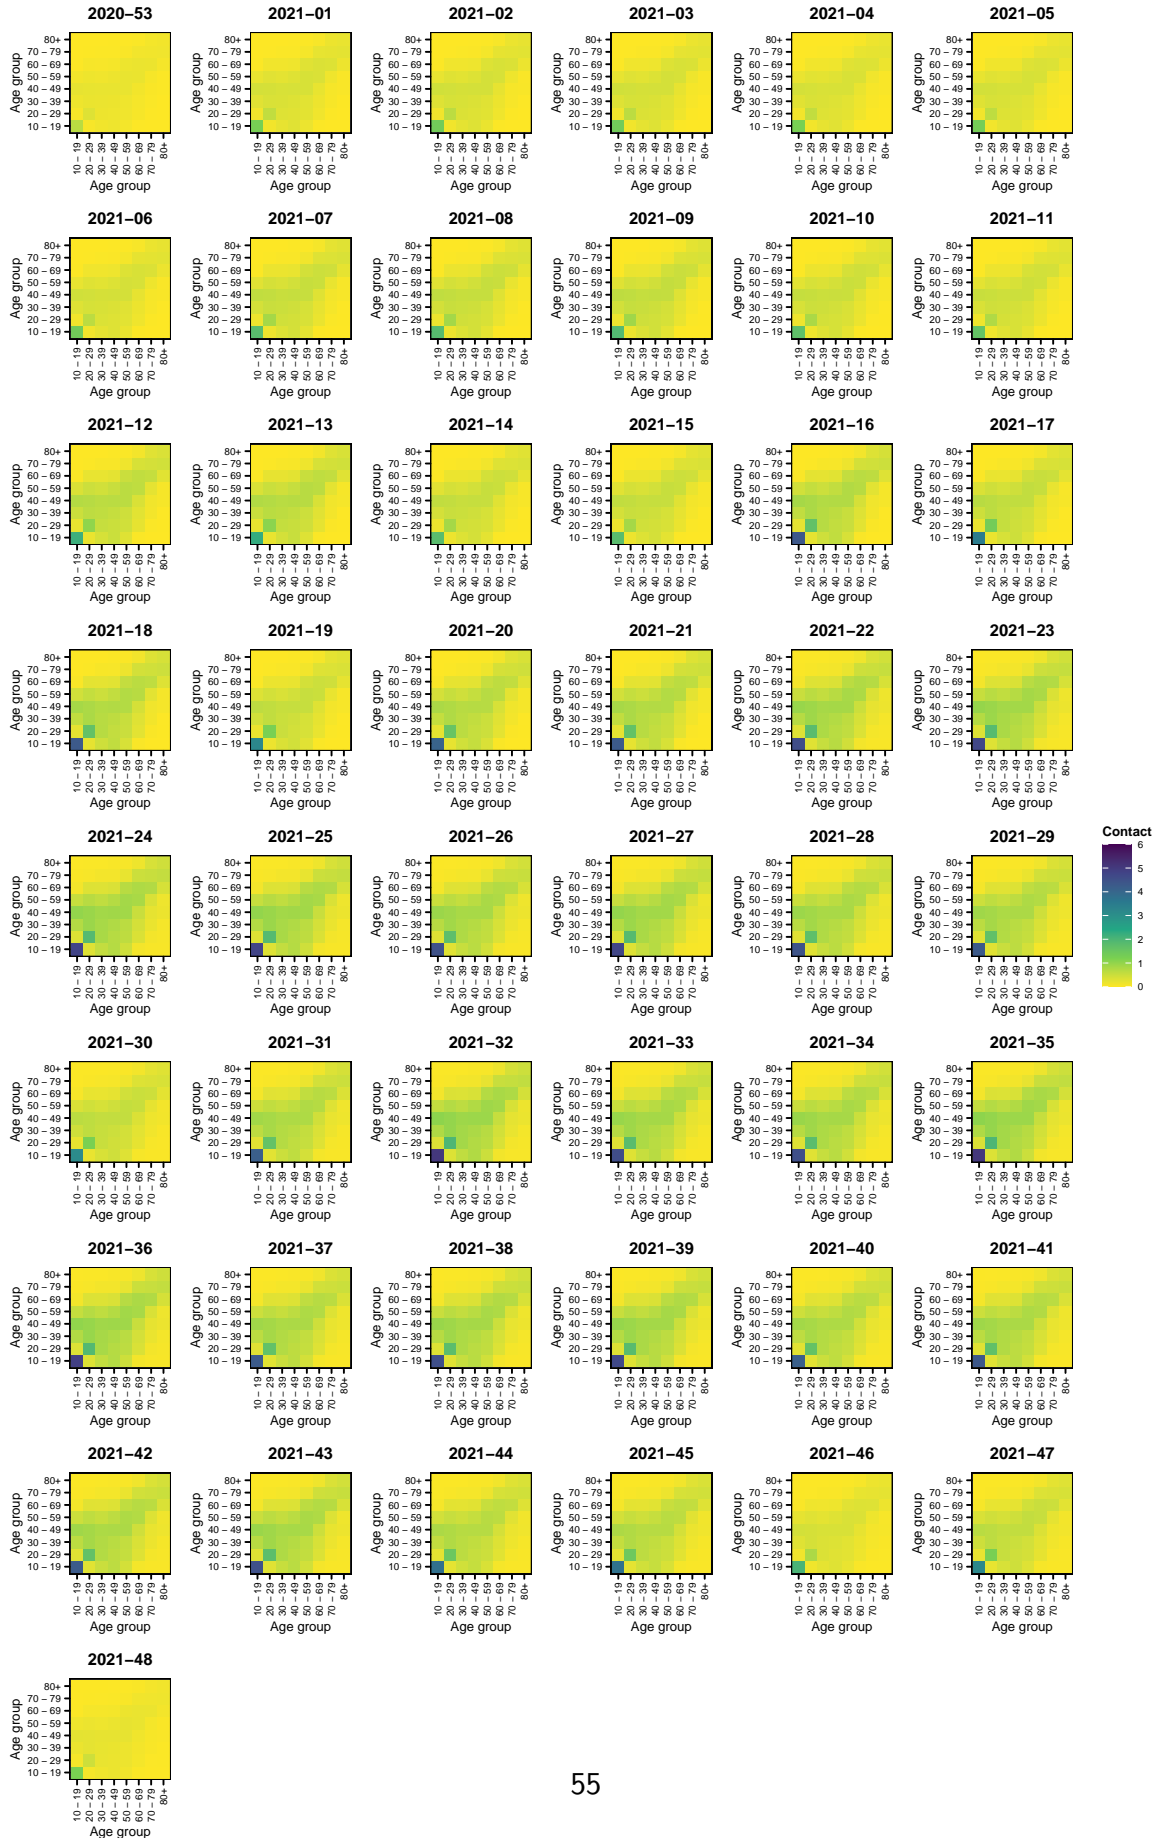

71 **4 Dispersion**

72 The time-varying adjacency matrices are plotted below

```
## [[1]]
```

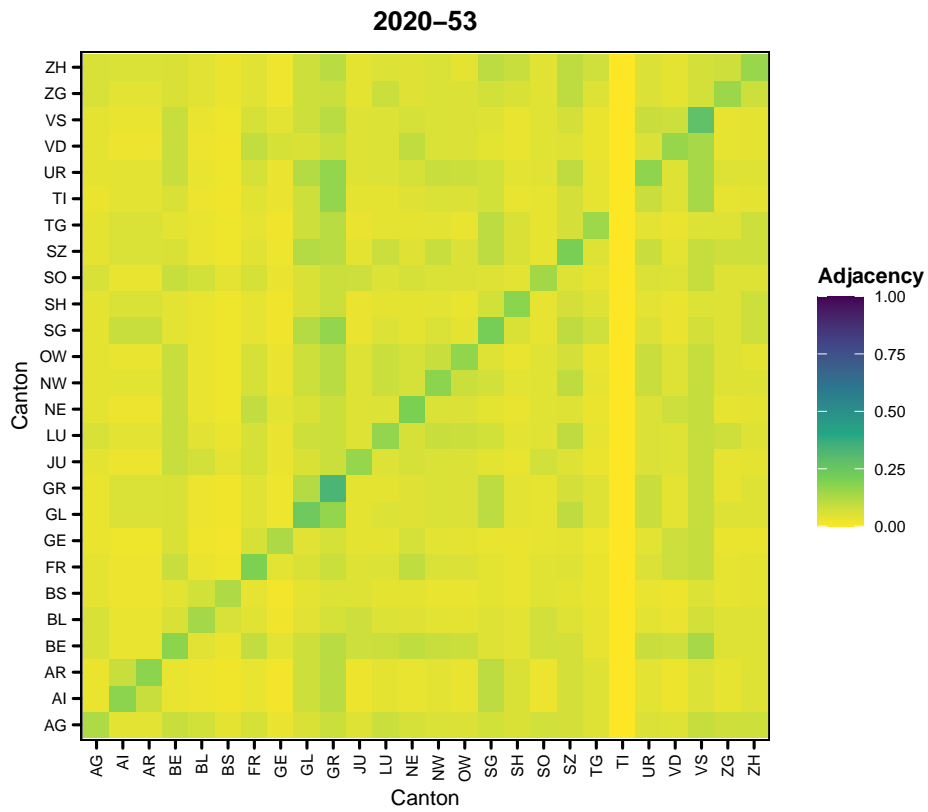

73

```
##
```

```
## [[2]]
```



2021-01

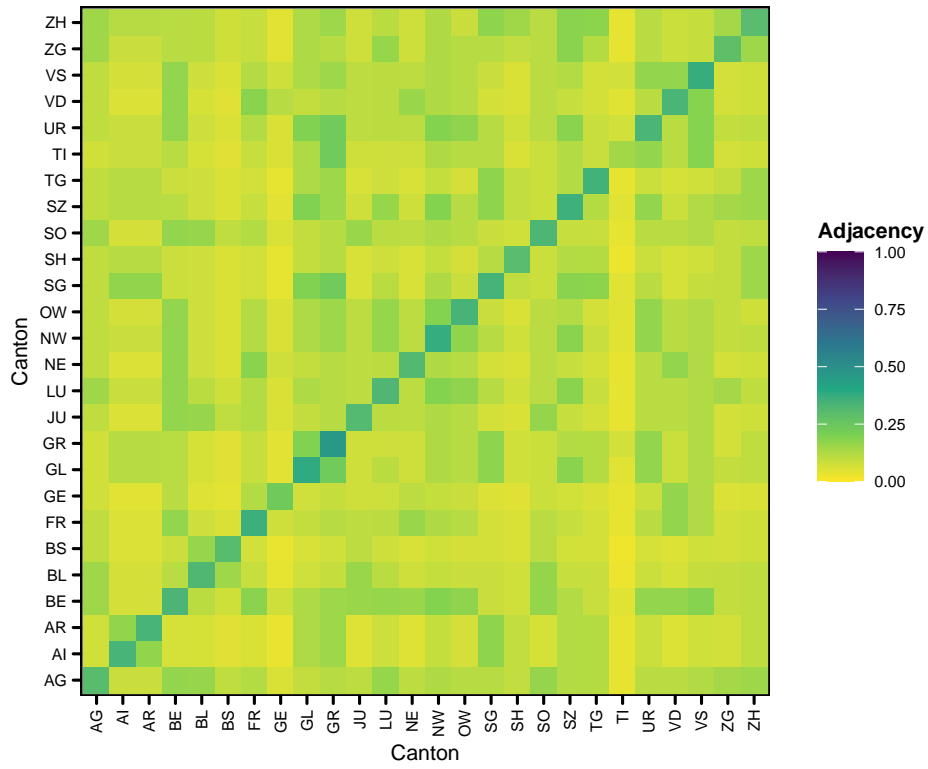

74

```
##
```

```
## [[3]]
```

2021-02

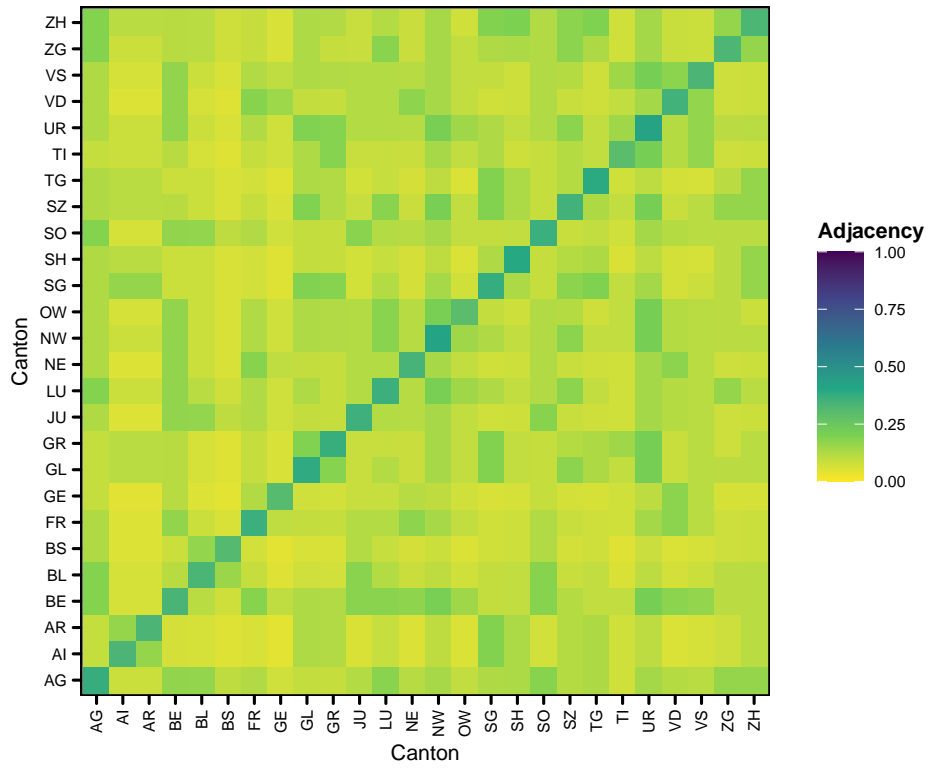

75

```
##
```

```
## [[4]]
```









2021-07

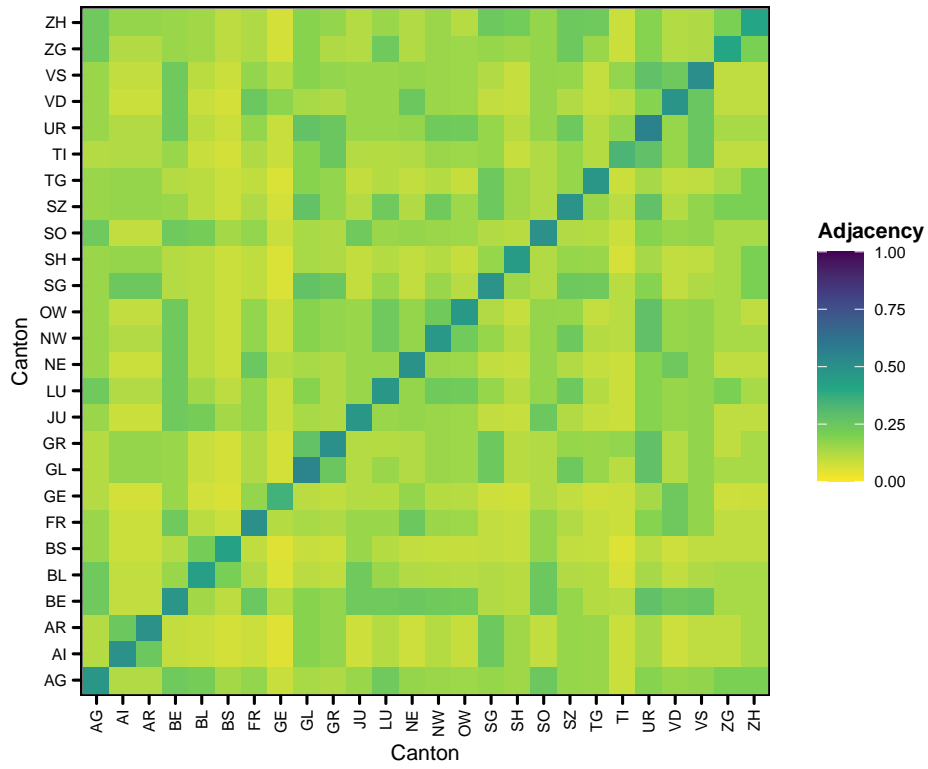

80

##

## [[9]]





2021-09

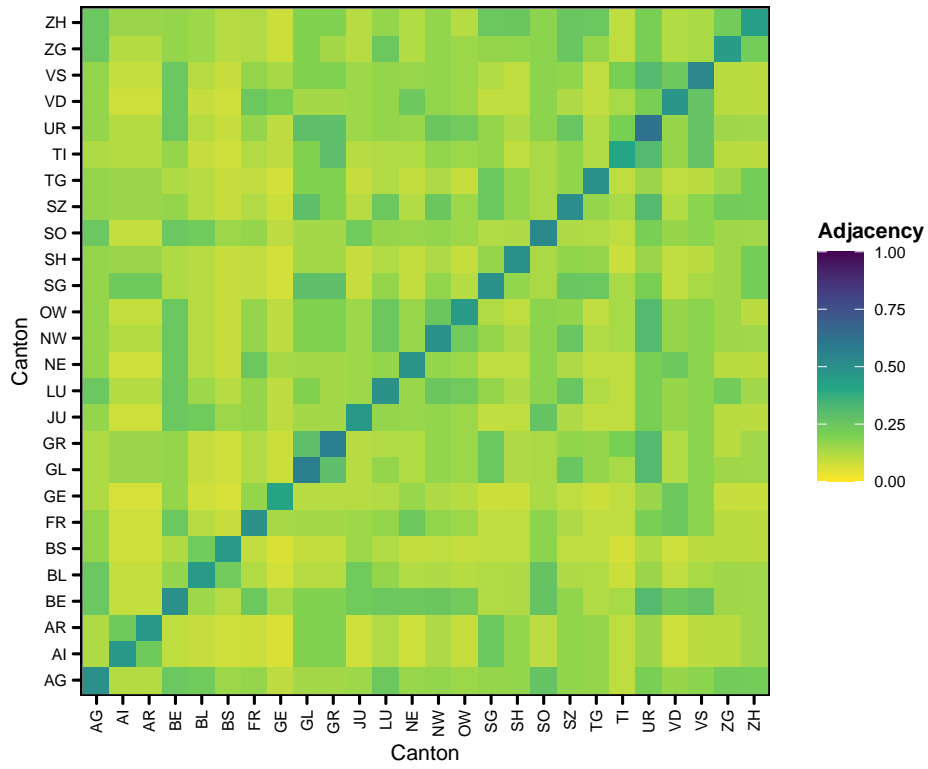

82

```
##  
## [[11]]
```

2021-10

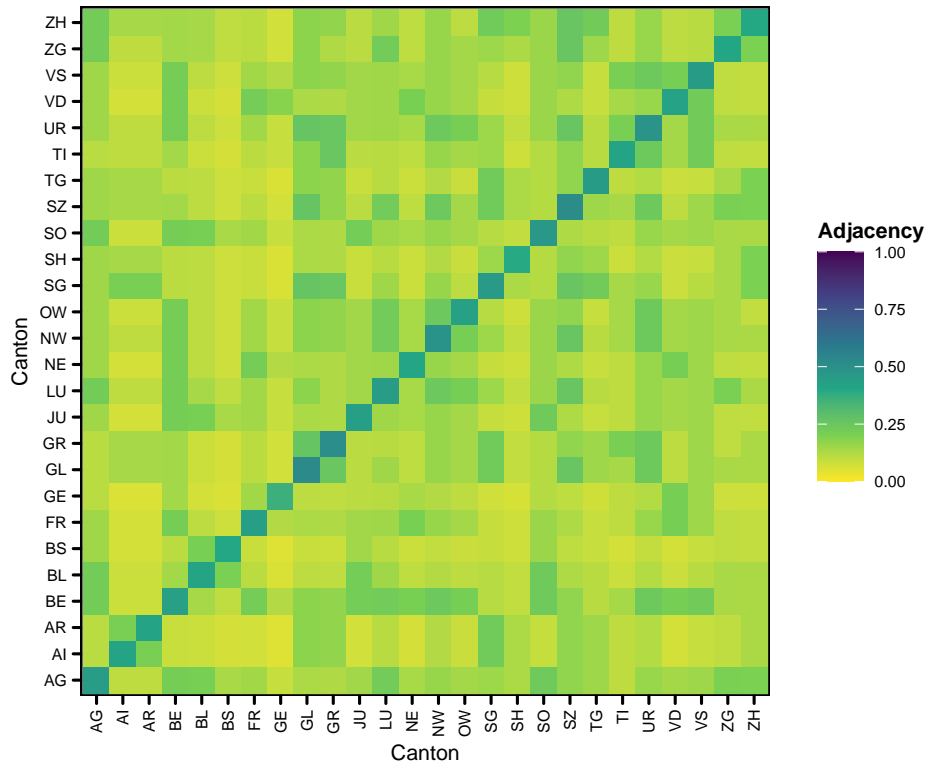

83

##

## [[12]]



2021-12

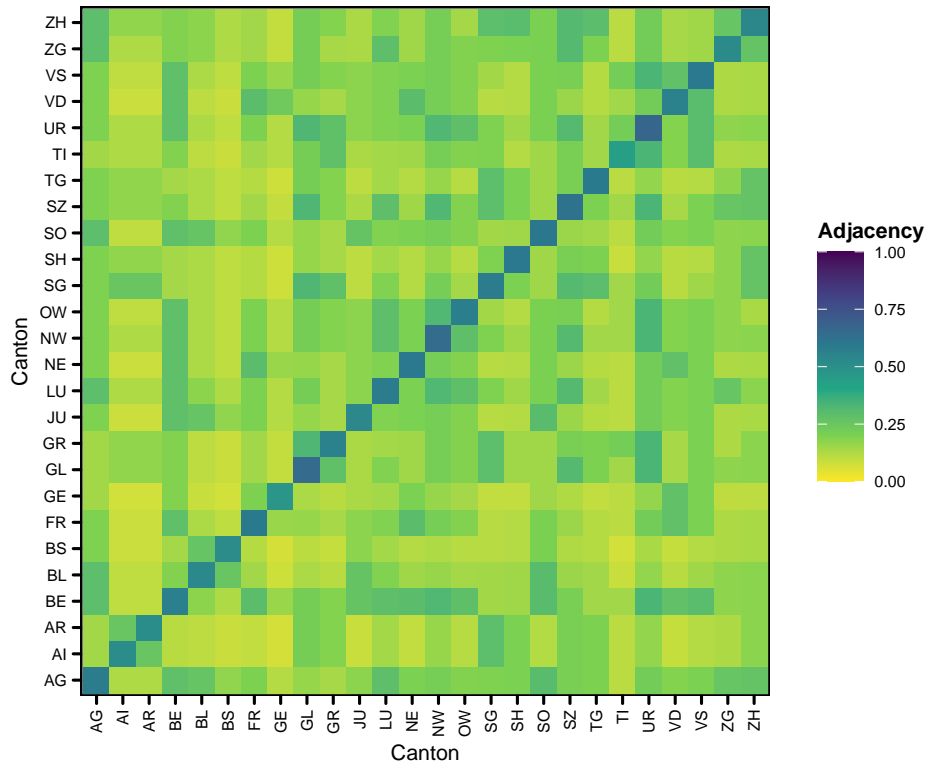

85

```
##
```

```
## [[14]]
```

2021-13

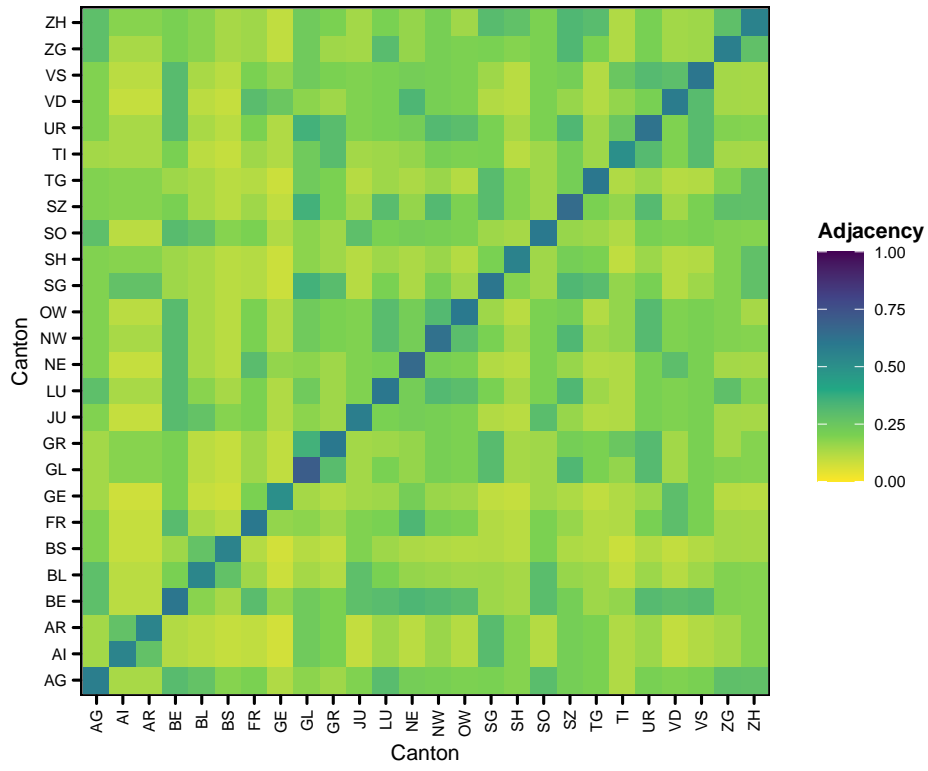

86

```
##
```

```
## [[15]]
```

2021-14

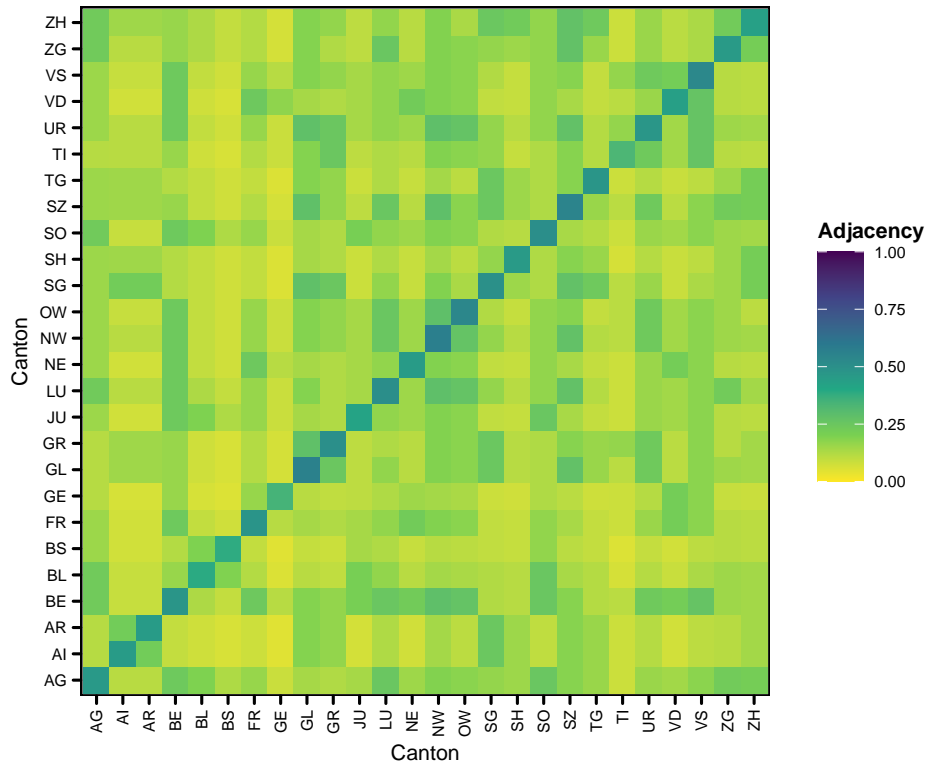

87

```
##
```

```
## [[16]]
```

2021-15

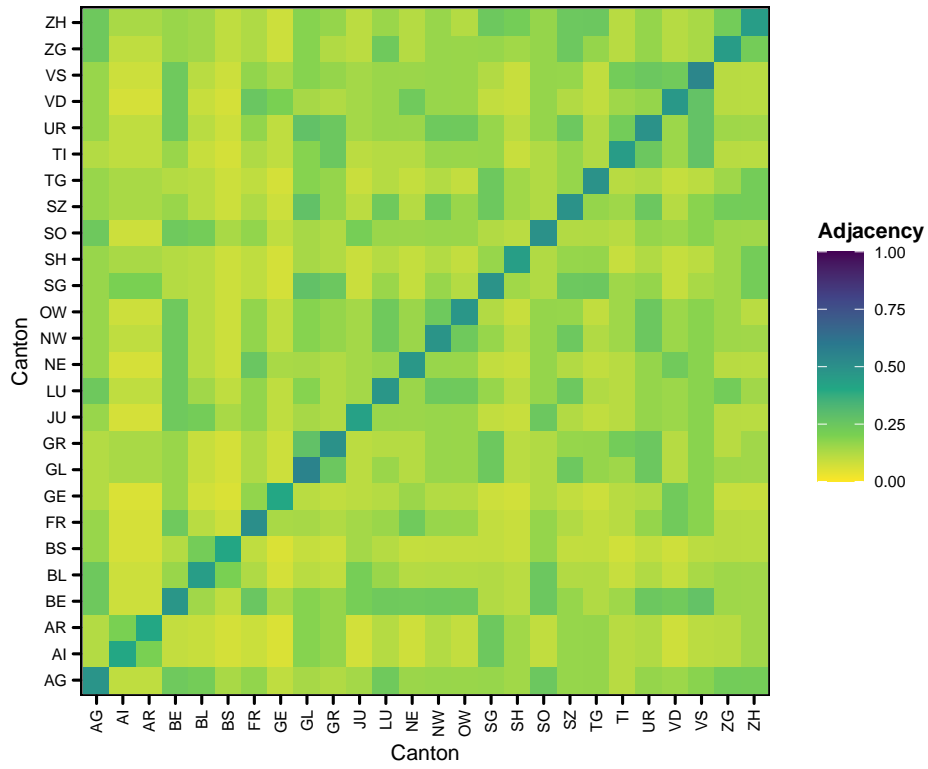

88

```
##
```

```
## [[17]]
```

### 2021-16

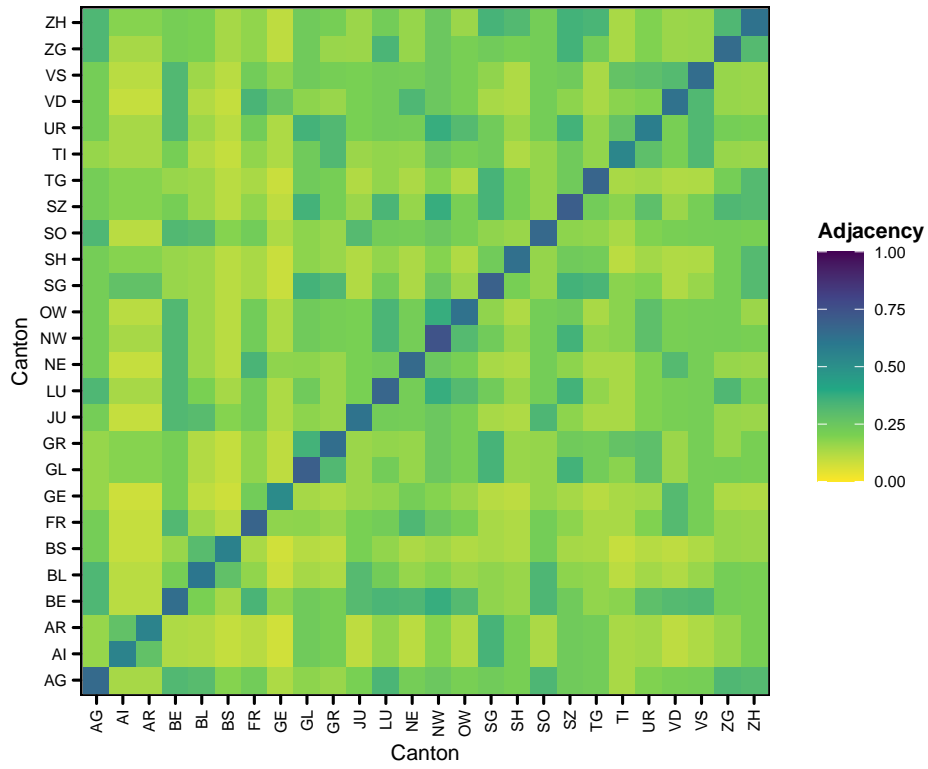

89

##

## [[18]]



2021-17

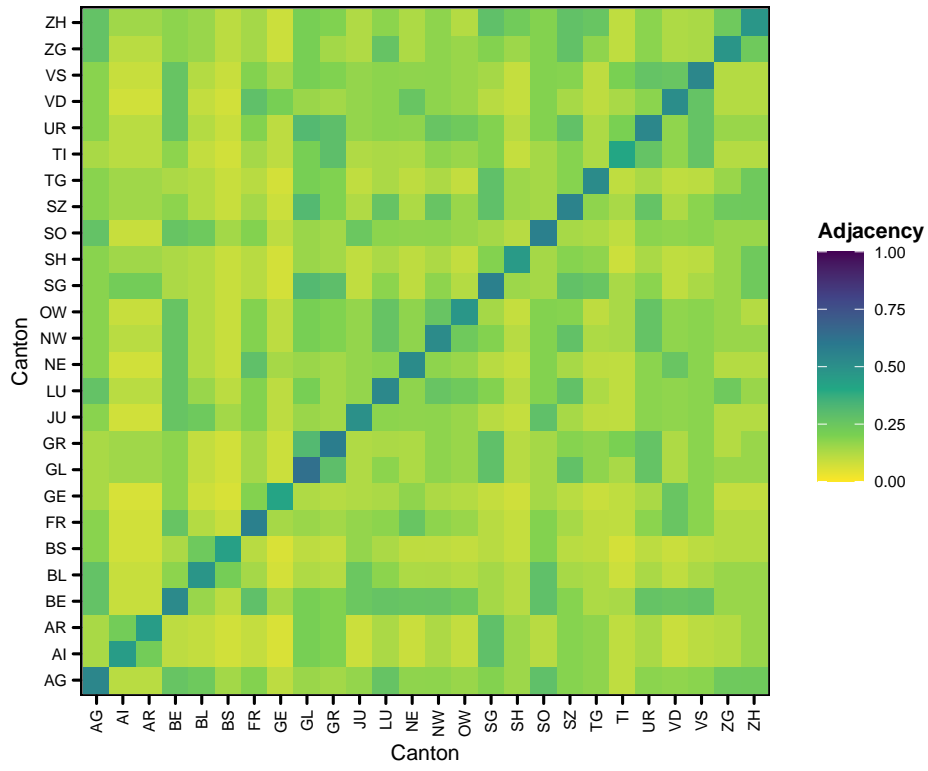

90

##

## [[19]]

2021-18

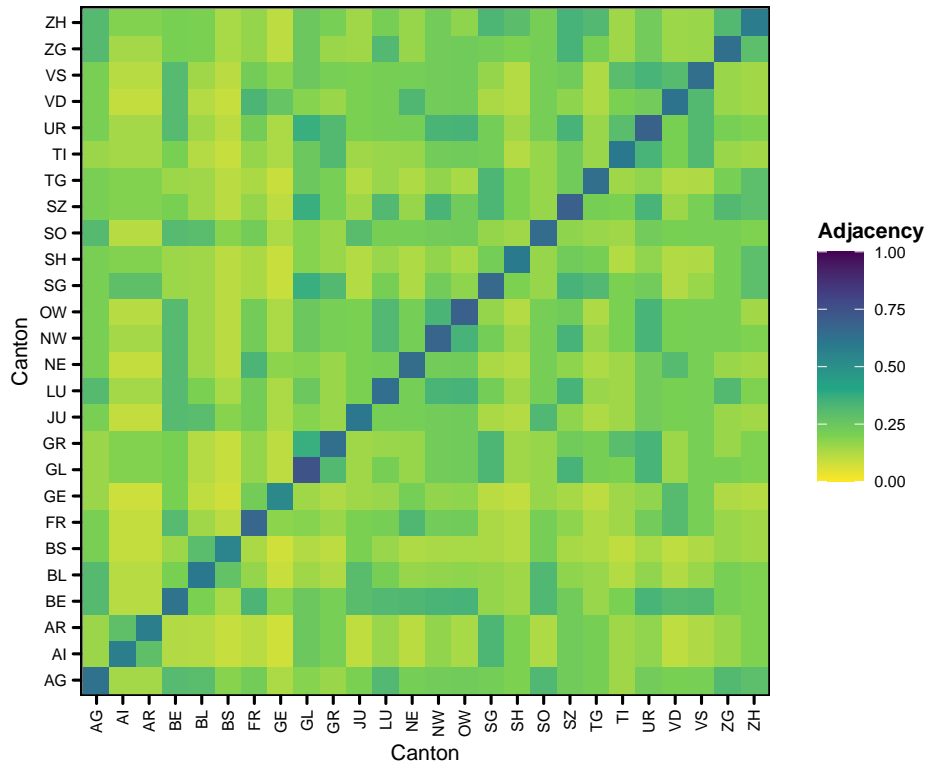

91

##

## [[20]]

2021-19

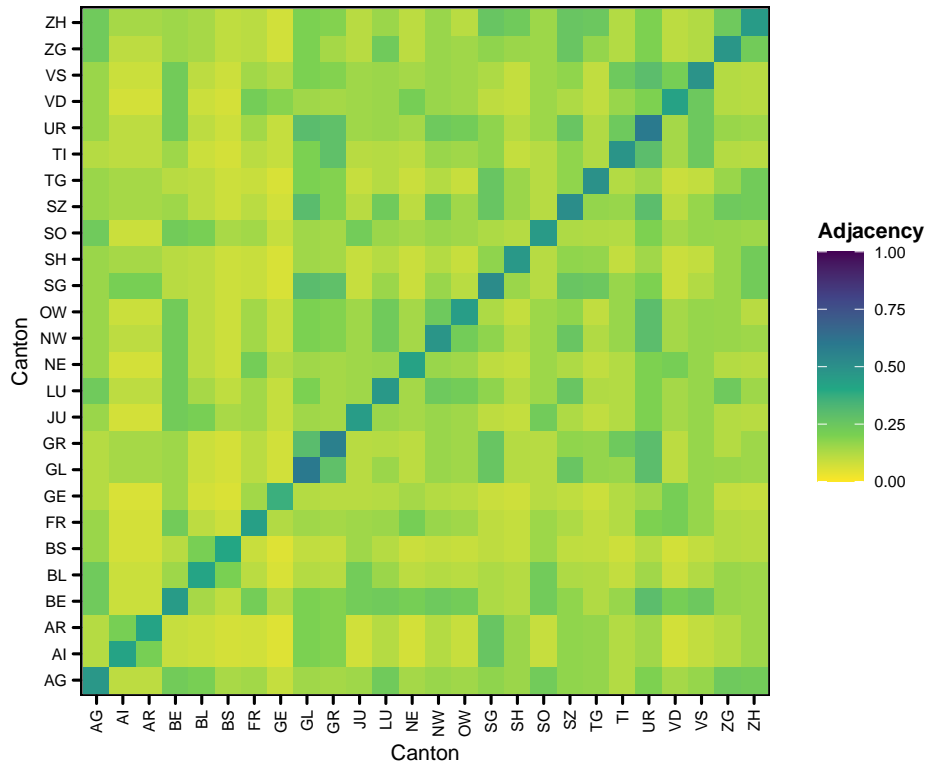

92

##

## [[21]]

2021-20

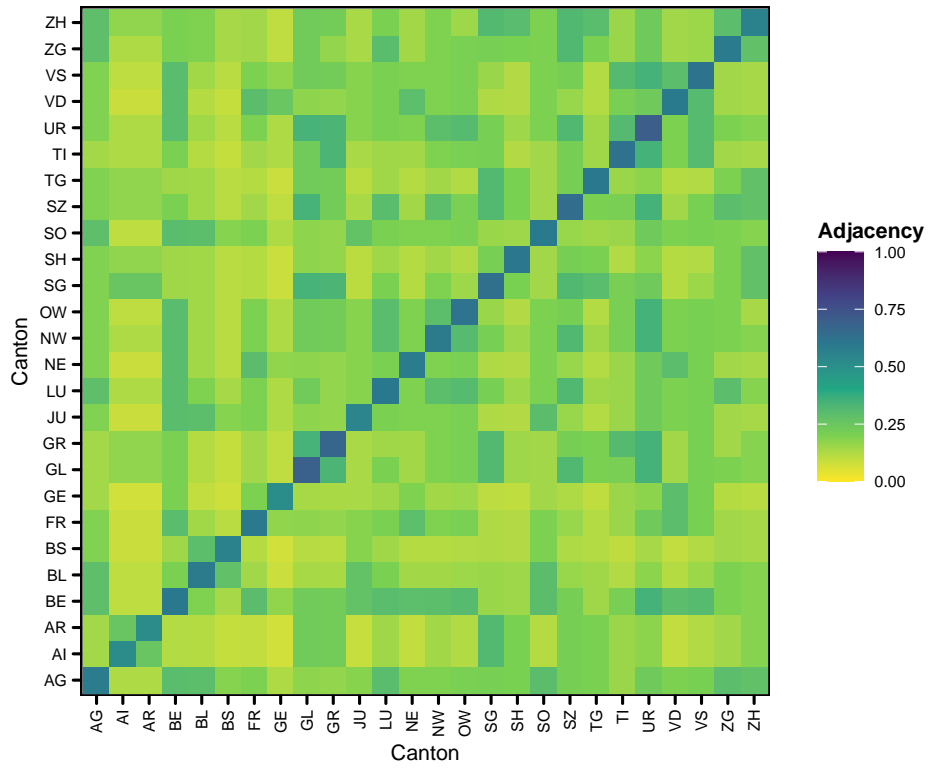

93

##

## [[22]]

2021-21

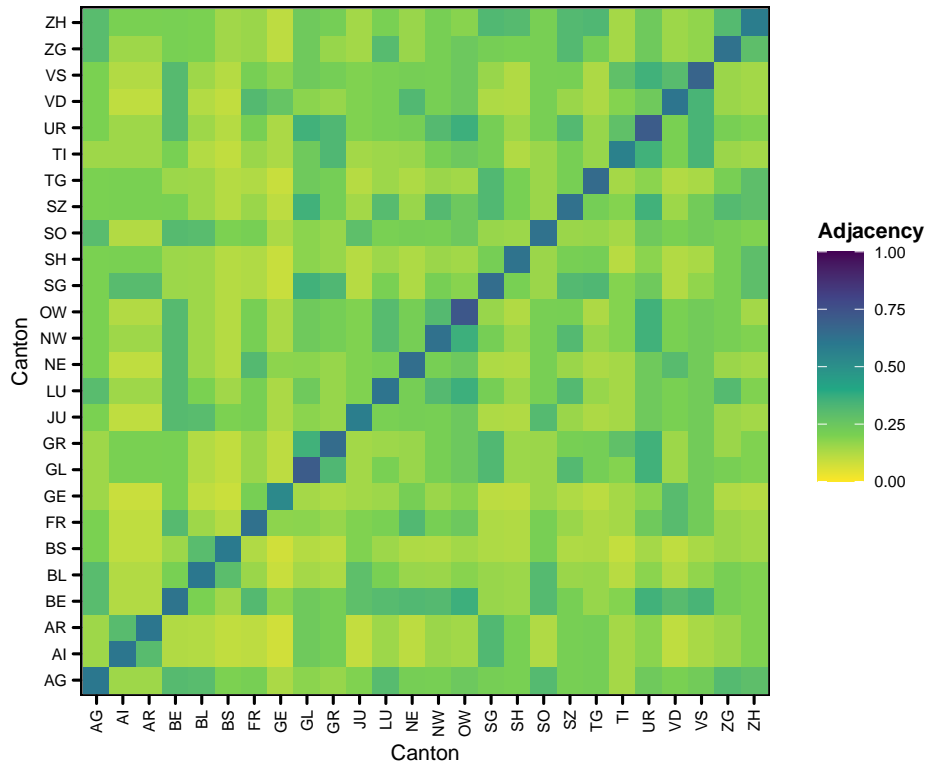

94

##

## [[23]]

2021-22

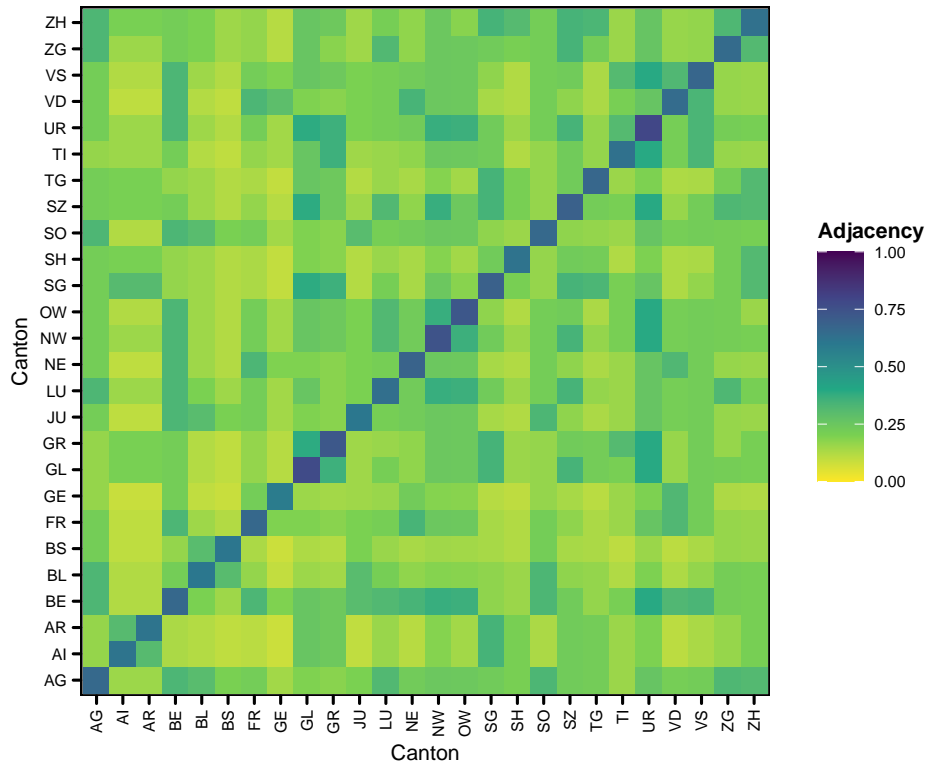

95

##

## [[24]]



2021-24

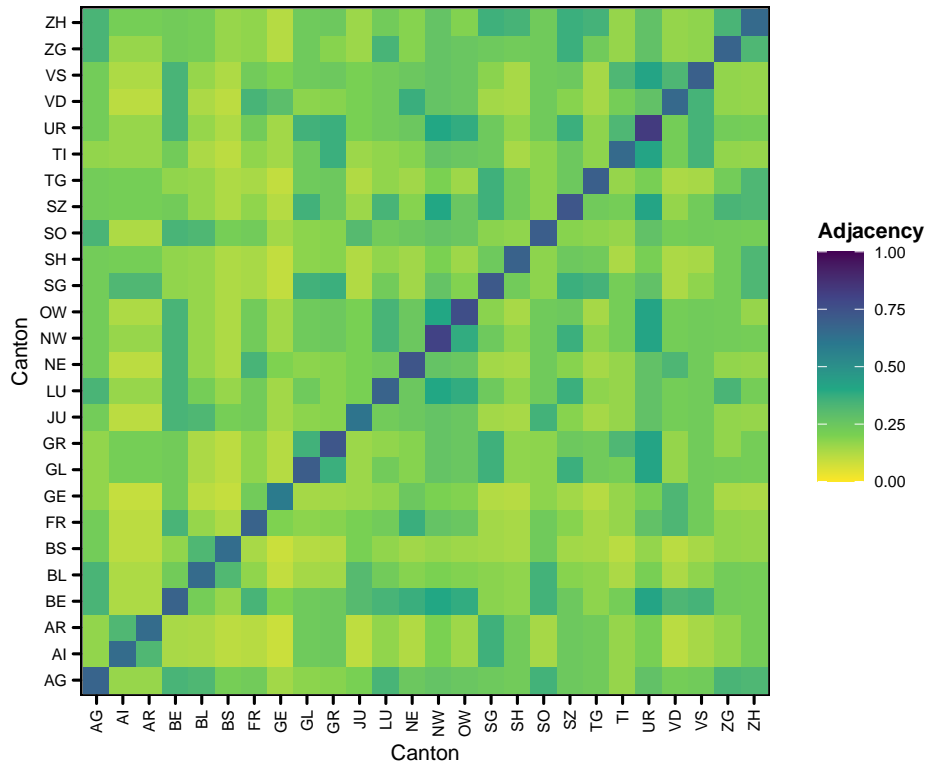

97

##

## [[26]]



2021-25

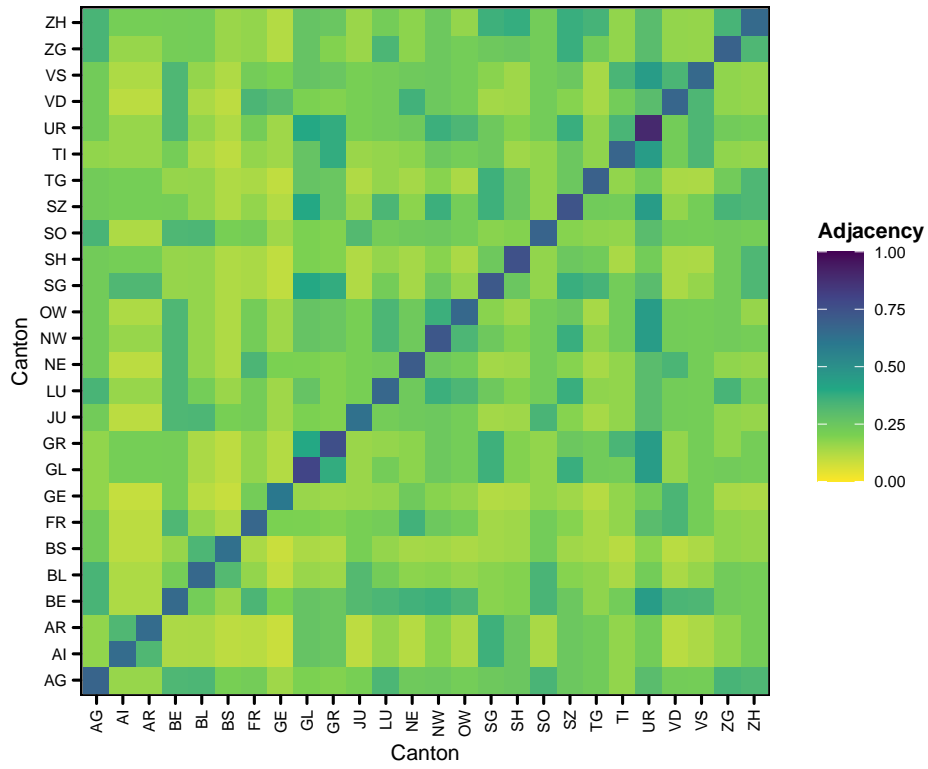

98

##

## [[27]]

2021-26

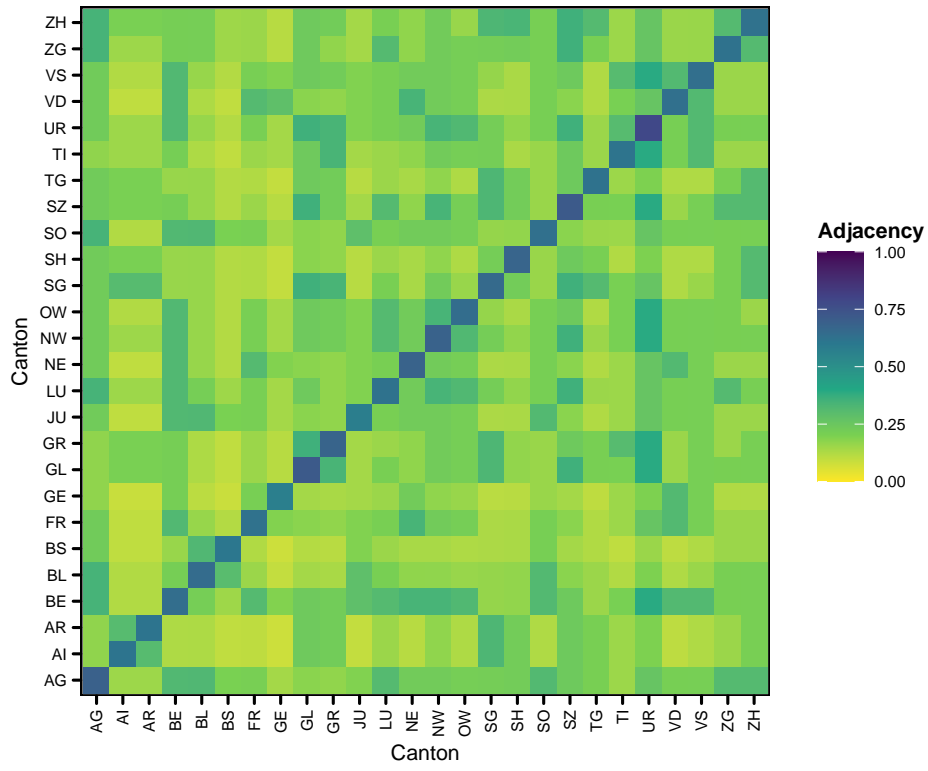

99

##

## [[28]]

2021-27

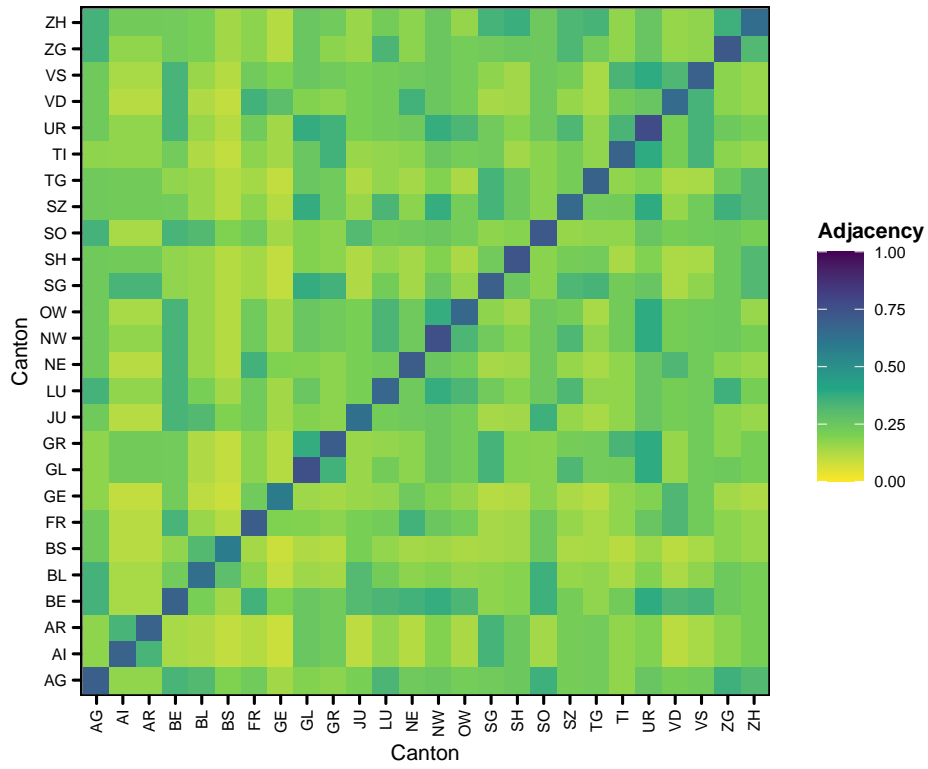

100

##

## [[29]]

2021-28

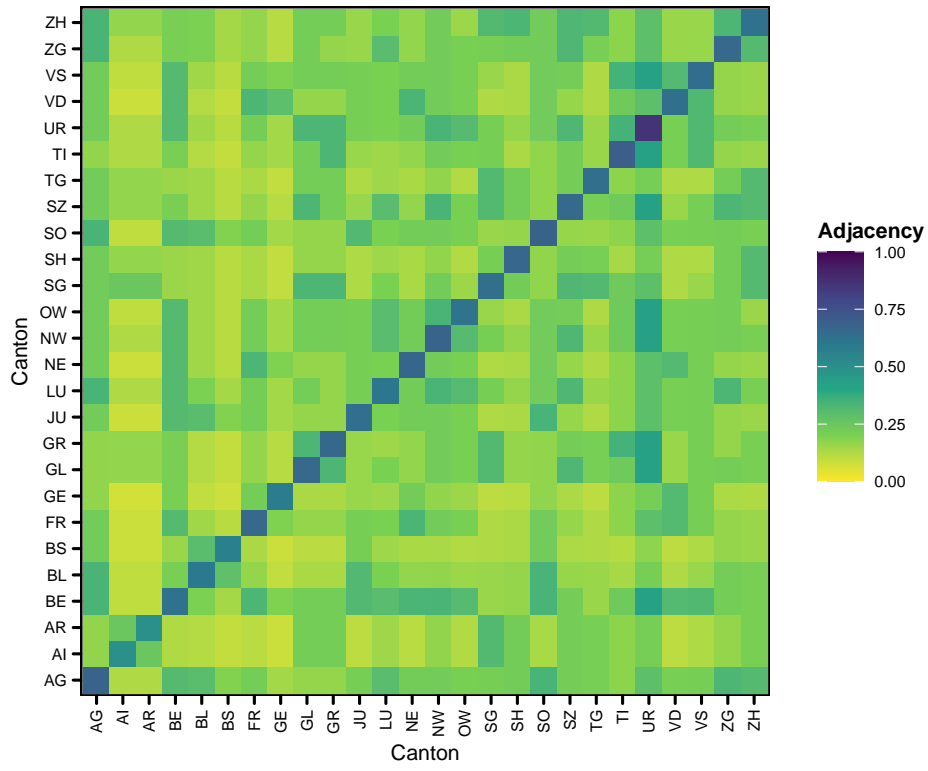

101

##

## [[30]]

2021-29

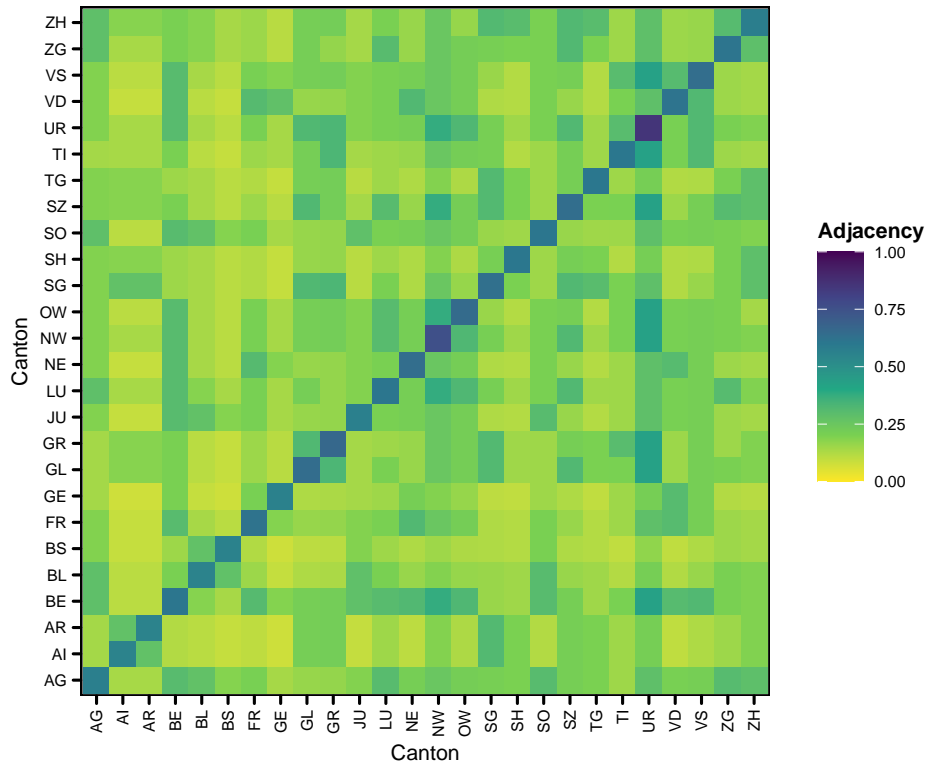

102

##

## [[31]]



2021-31

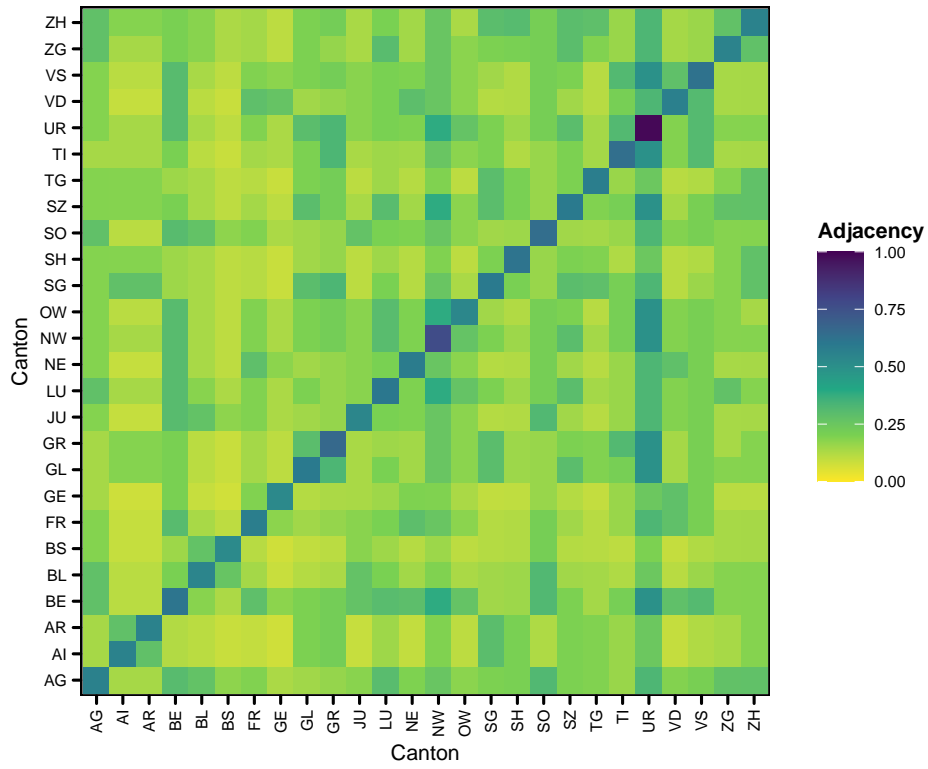

104

##

## [[33]]

2021-32

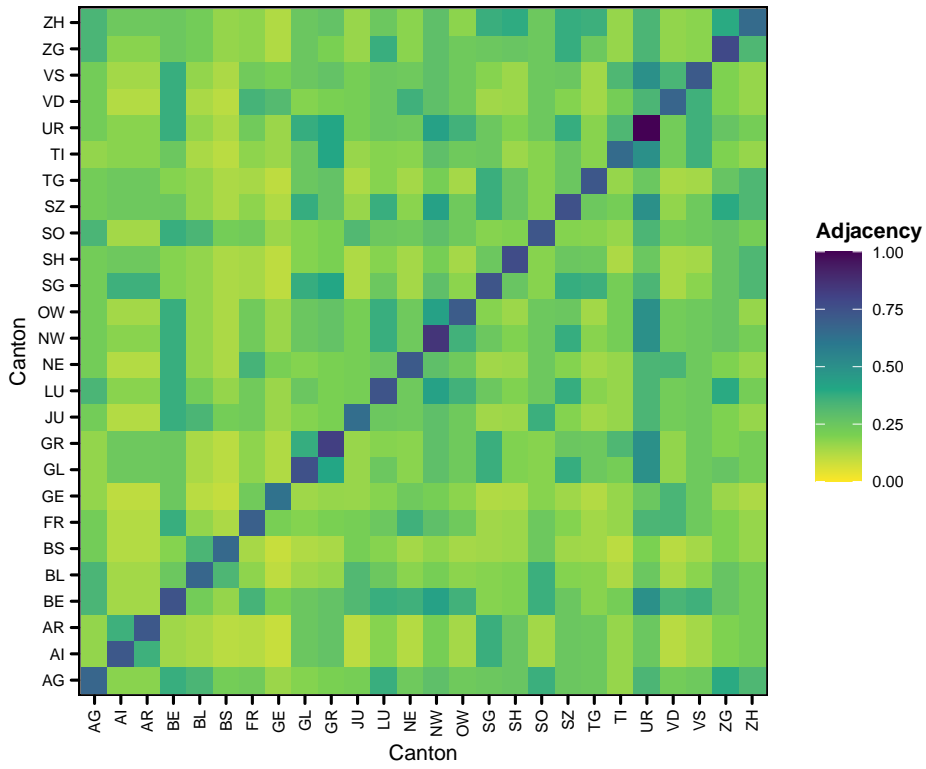

105

##

## [[34]]



2021-33

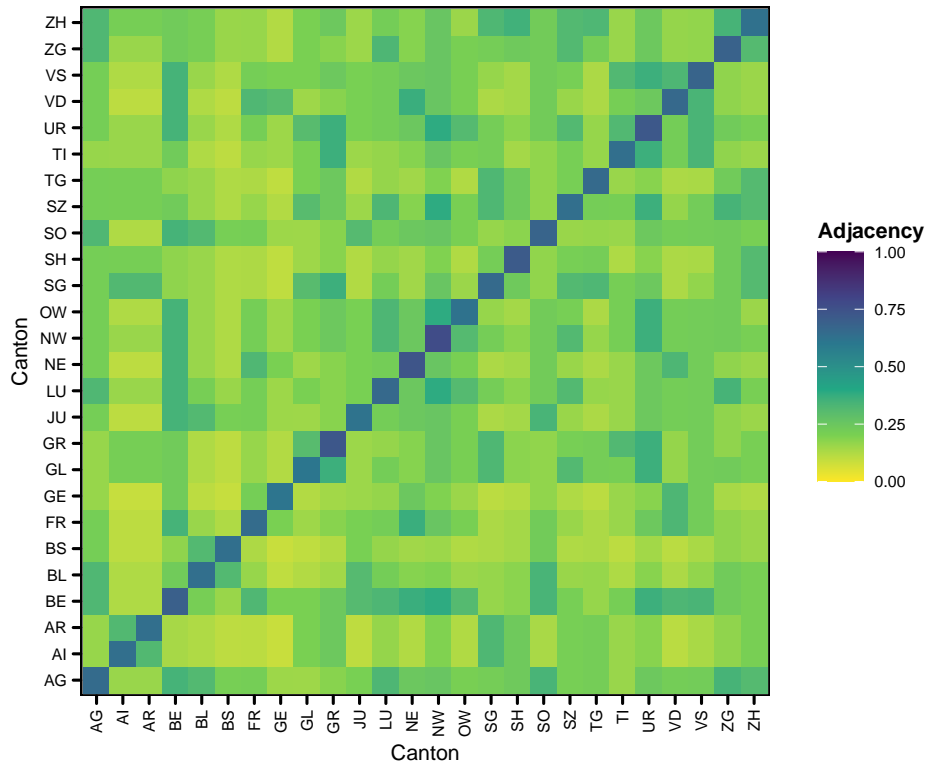

106

##

## [[35]]

### 2021-34

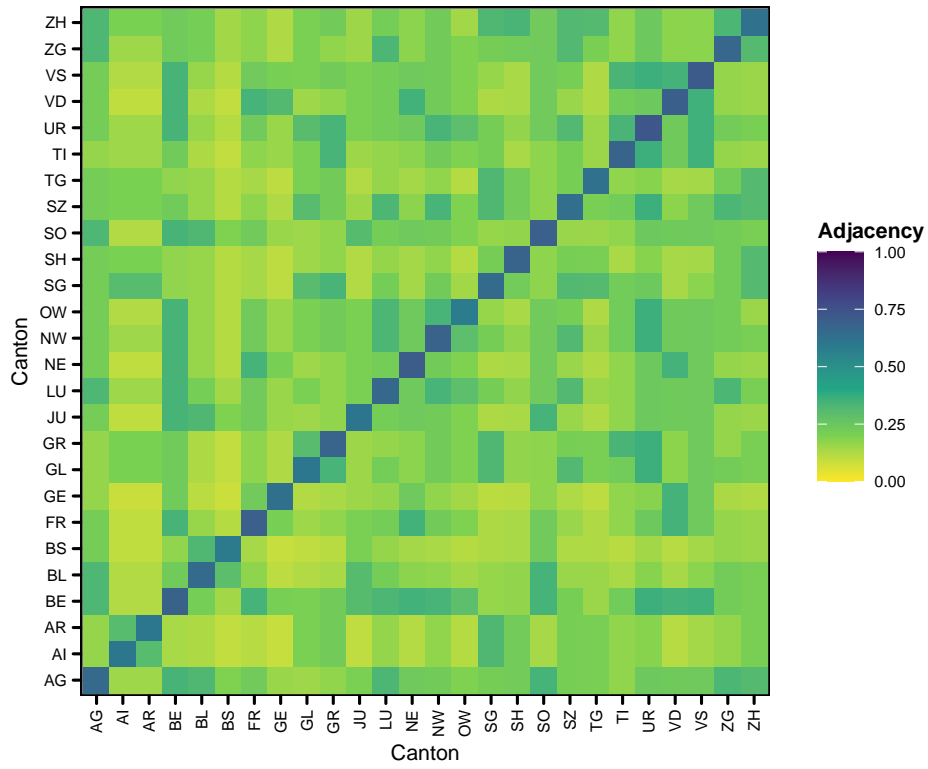

107

##

## [[36]]

2021-35

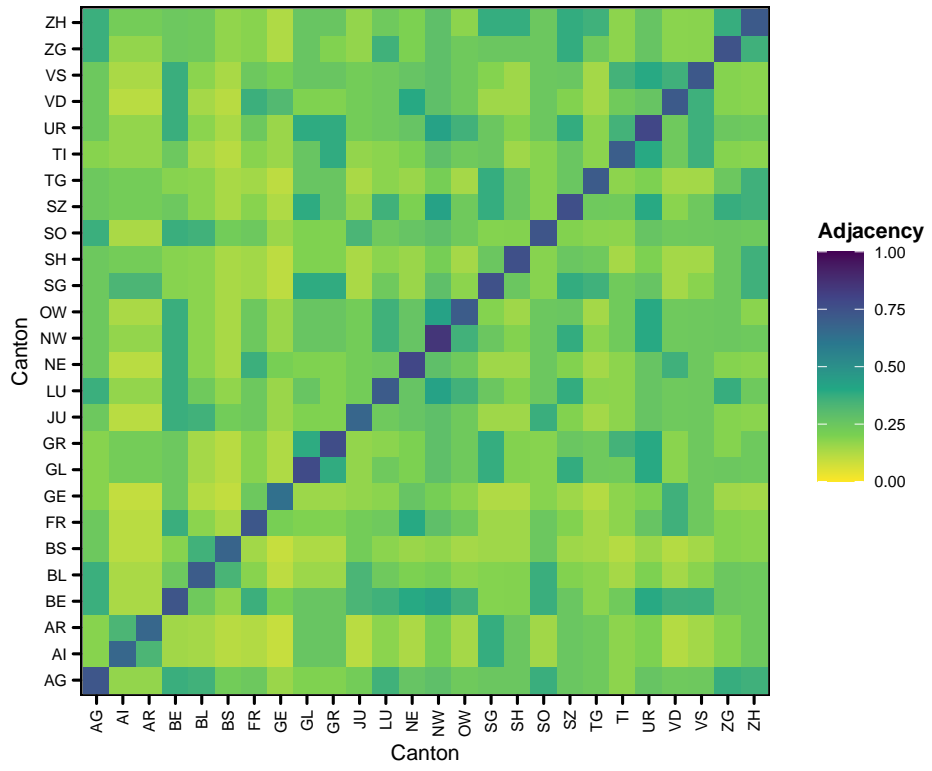

108

```
##
```

```
## [[37]]
```

2021-36

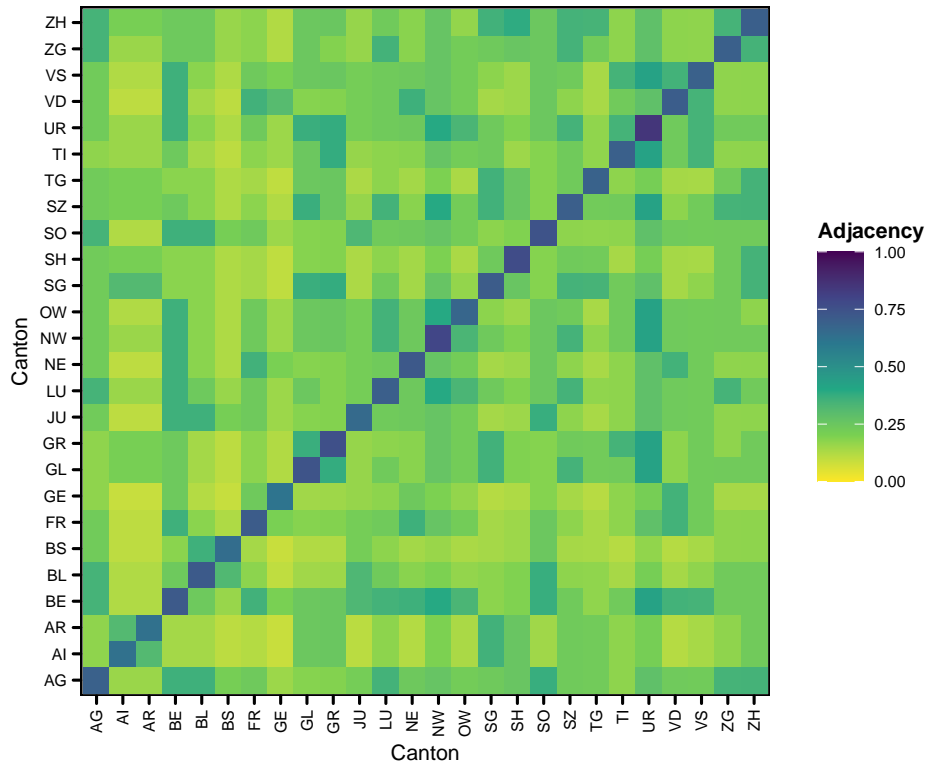

109

##

## [[38]]

2021-37

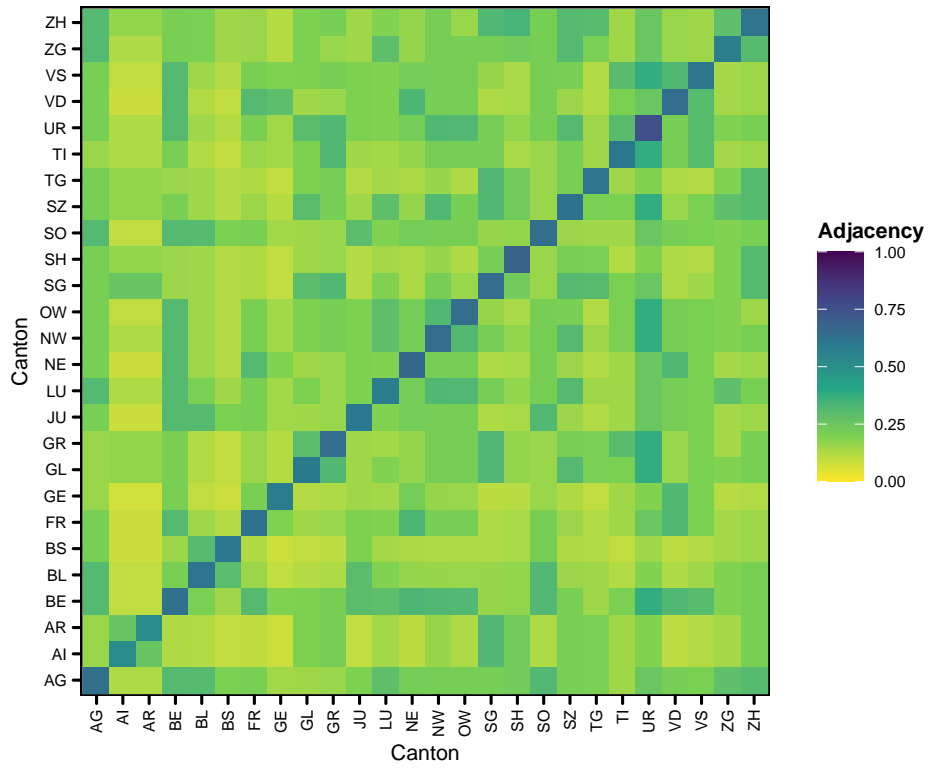

110

##

## [[39]]

2021-38

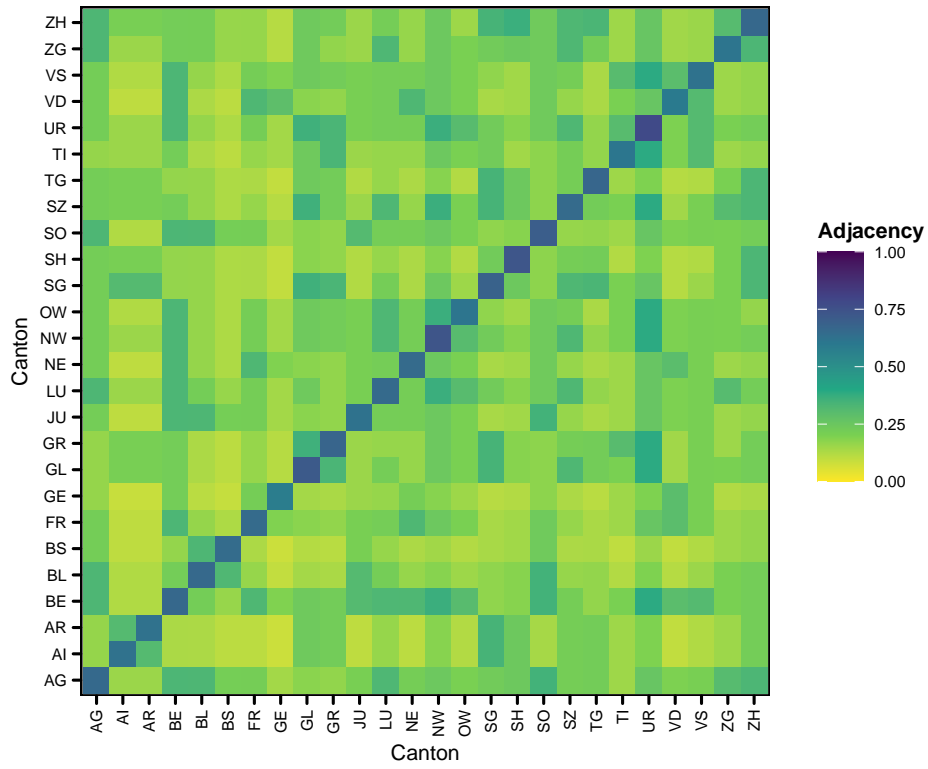

111

##

## [[40]]

2021-39

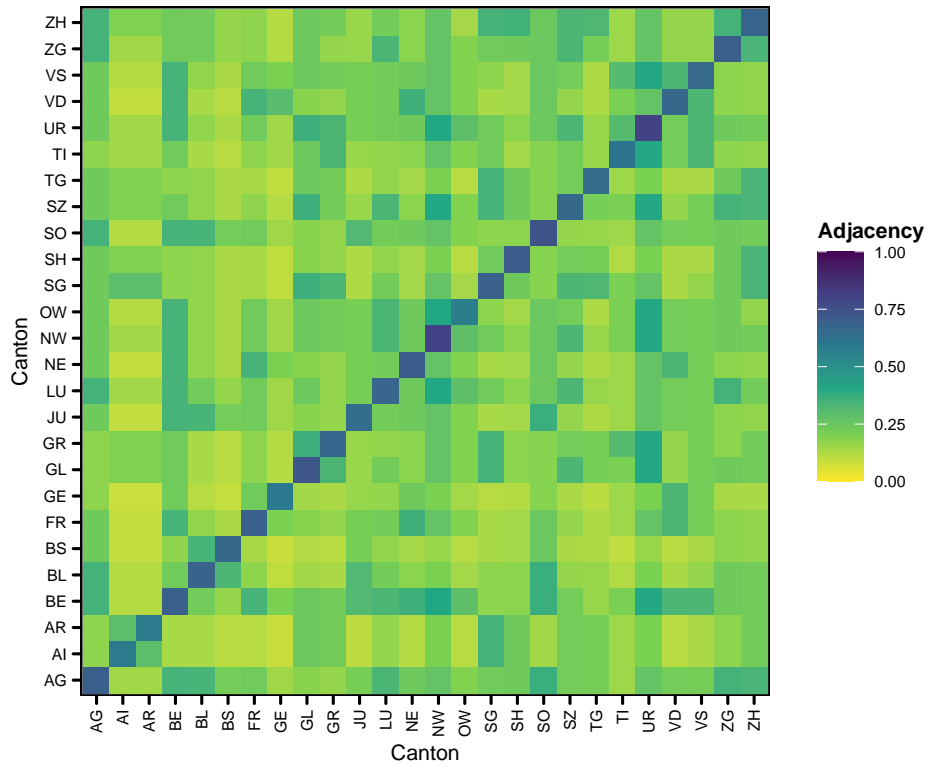

112

##

## [[41]]

2021-40

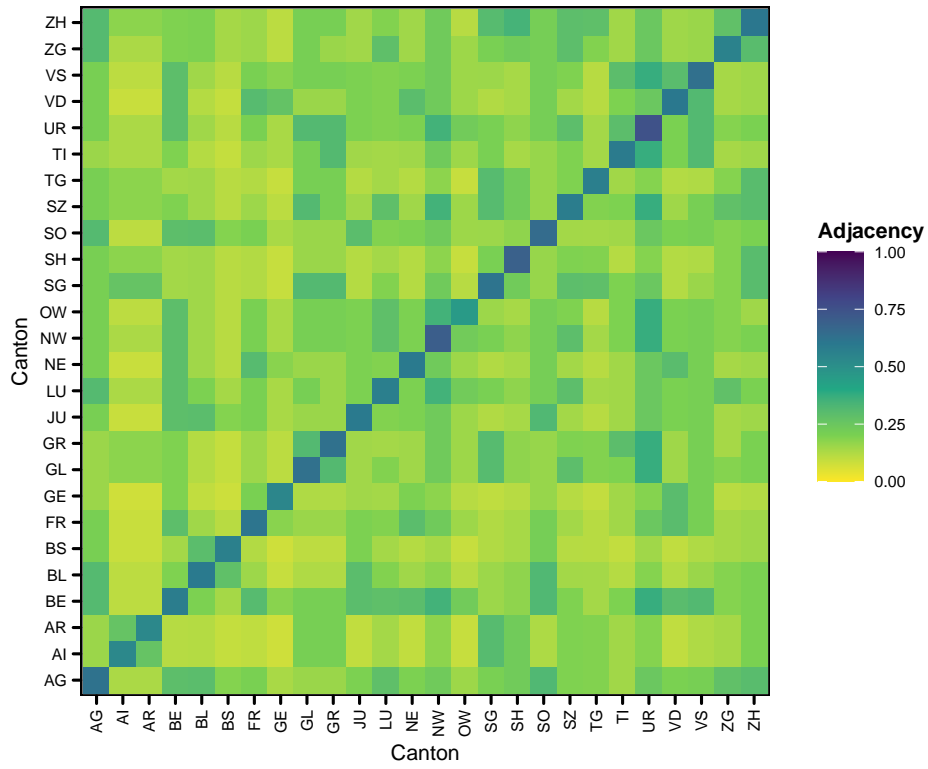

113

##

## [[42]]



2021-41

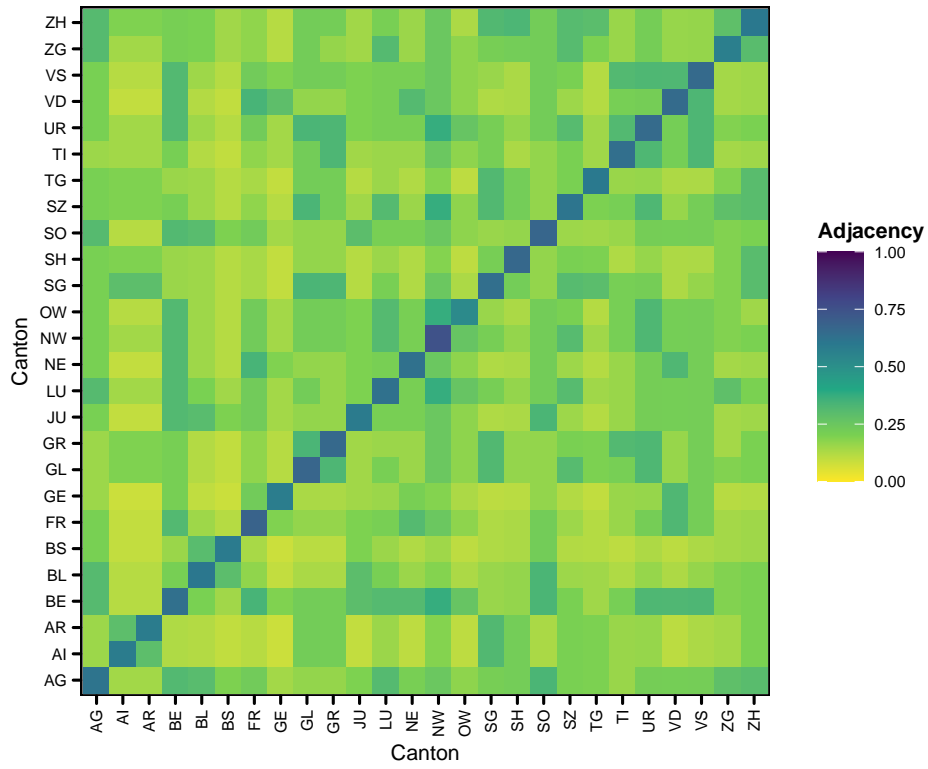

114

##

## [[43]]

2021-42

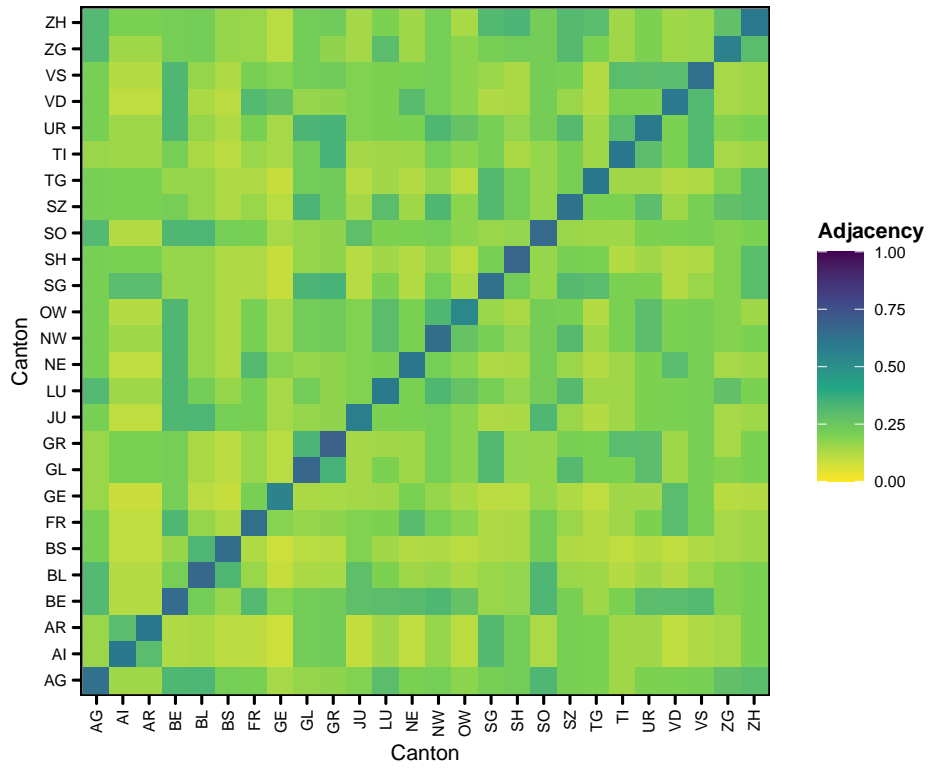

115

##

## [[44]]

2021-43

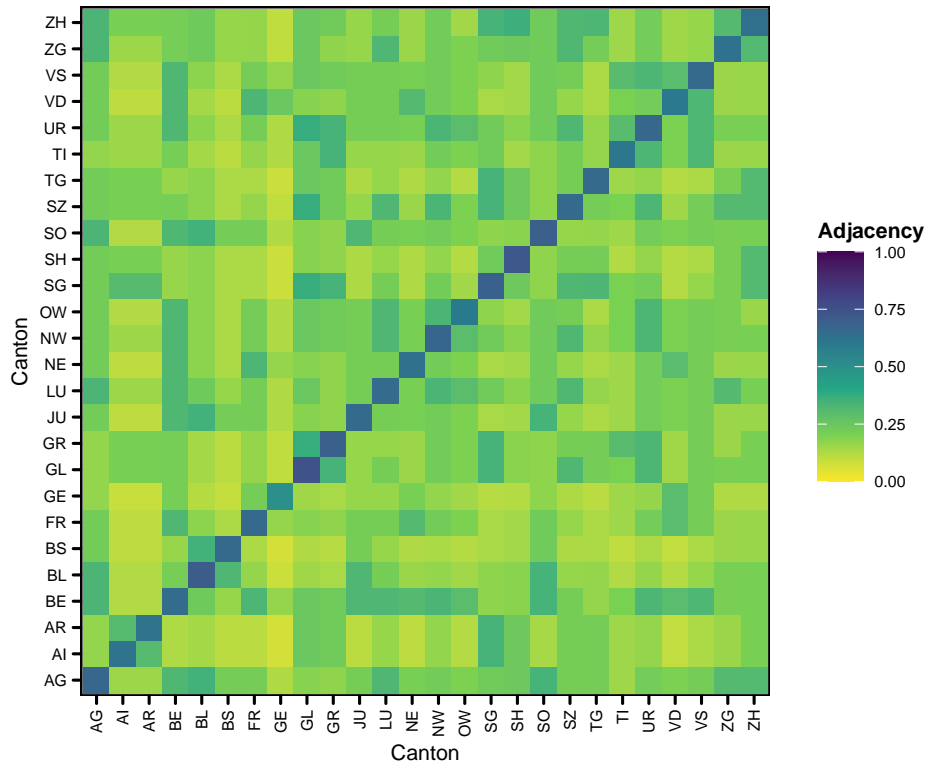

116

##

## [[45]]

2021-44

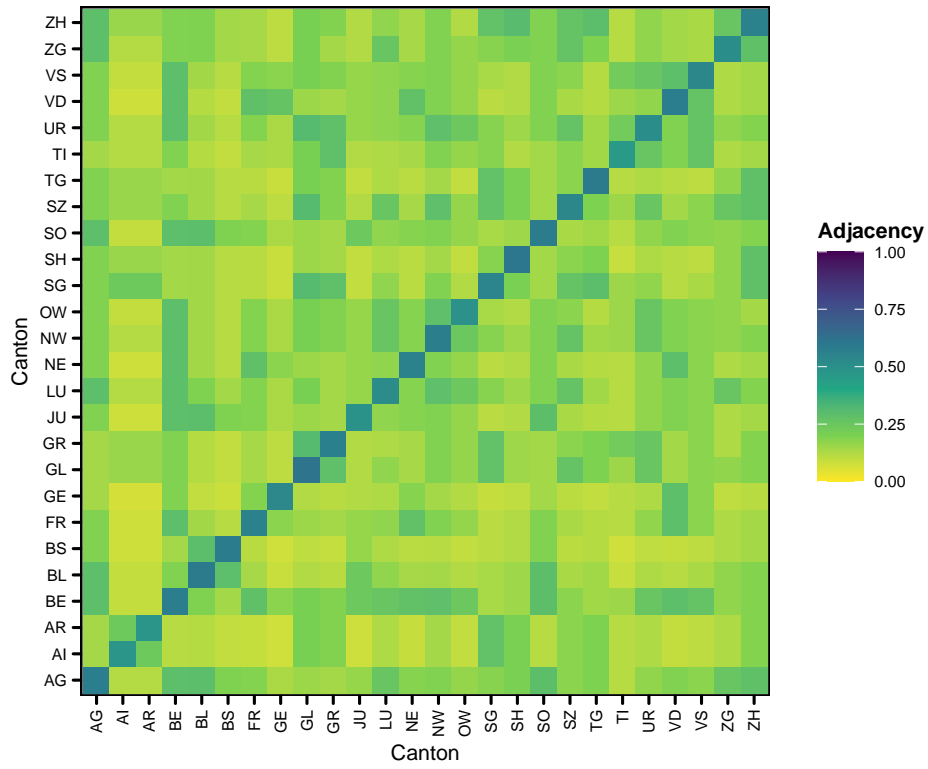

117

##

## [[46]]

2021-45

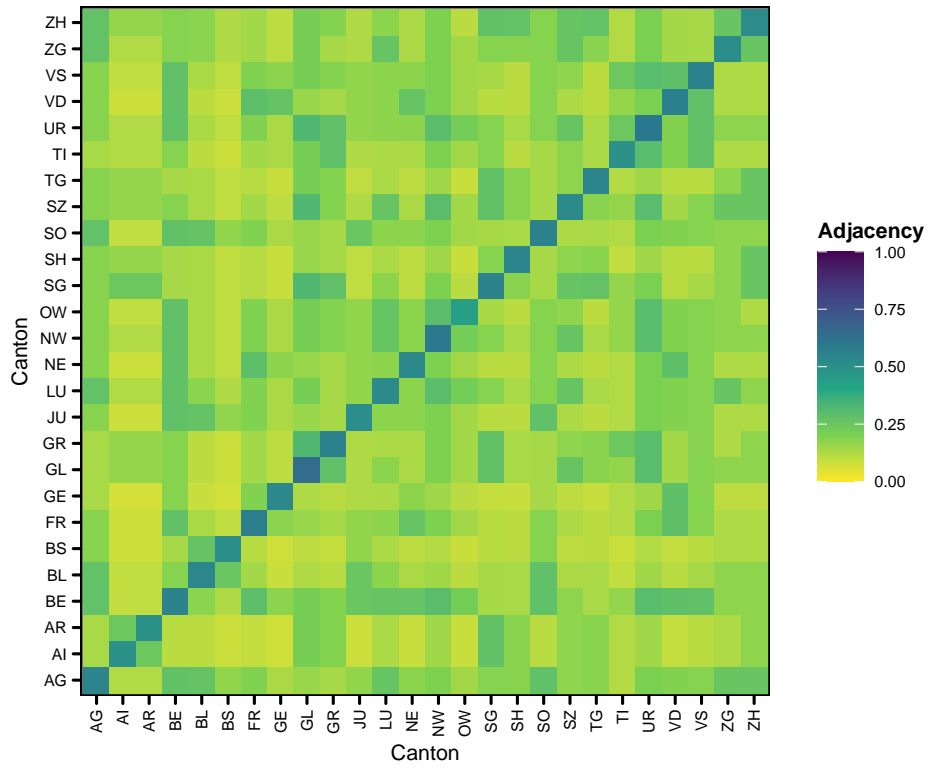

118

##

## [[47]]

2021-46

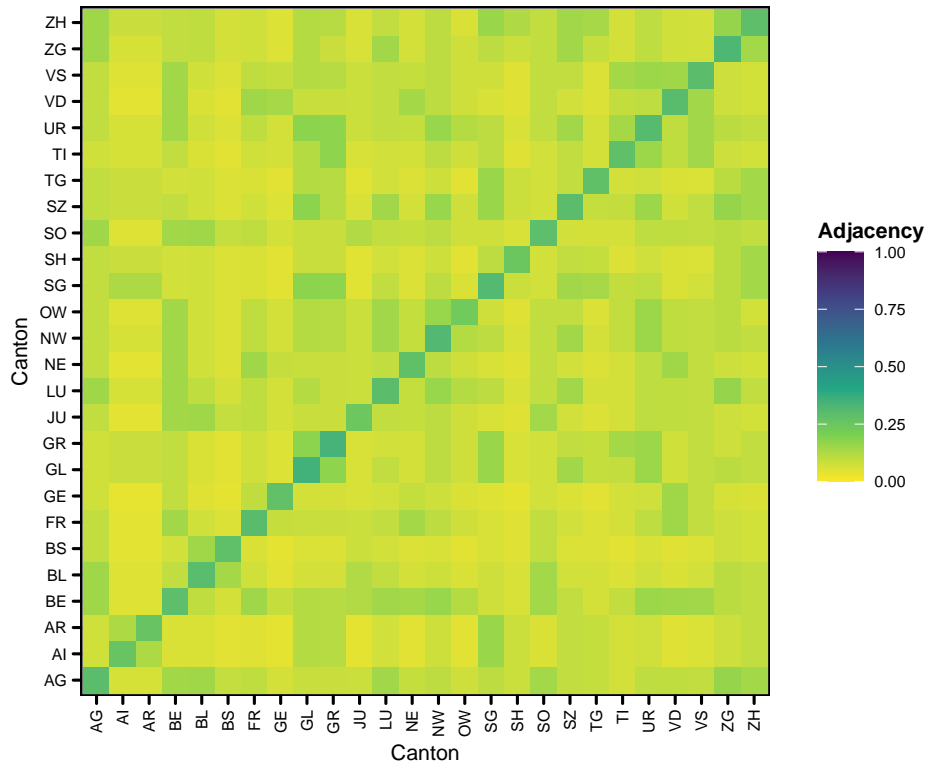

119

##

## [[48]]

2021-47

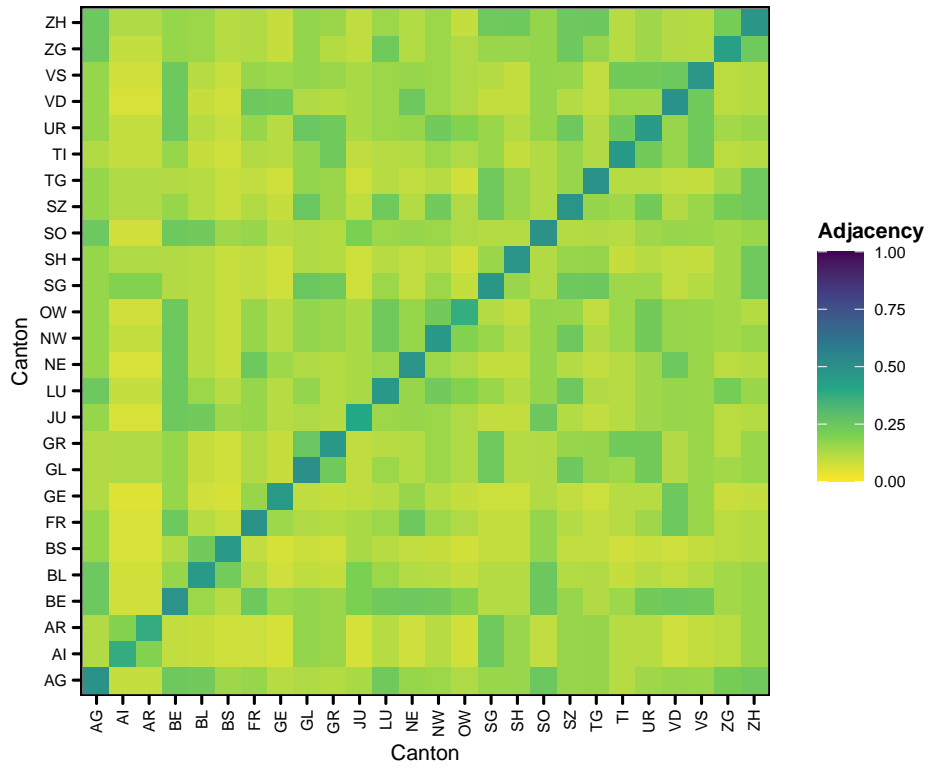

120

##

## [[49]]

2021-48

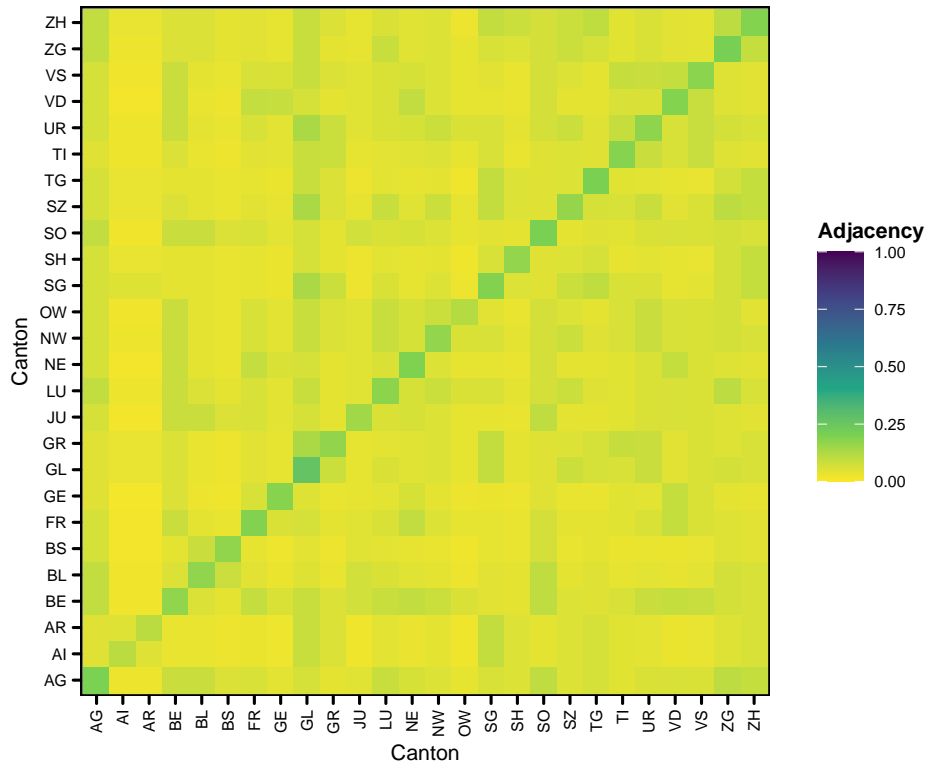



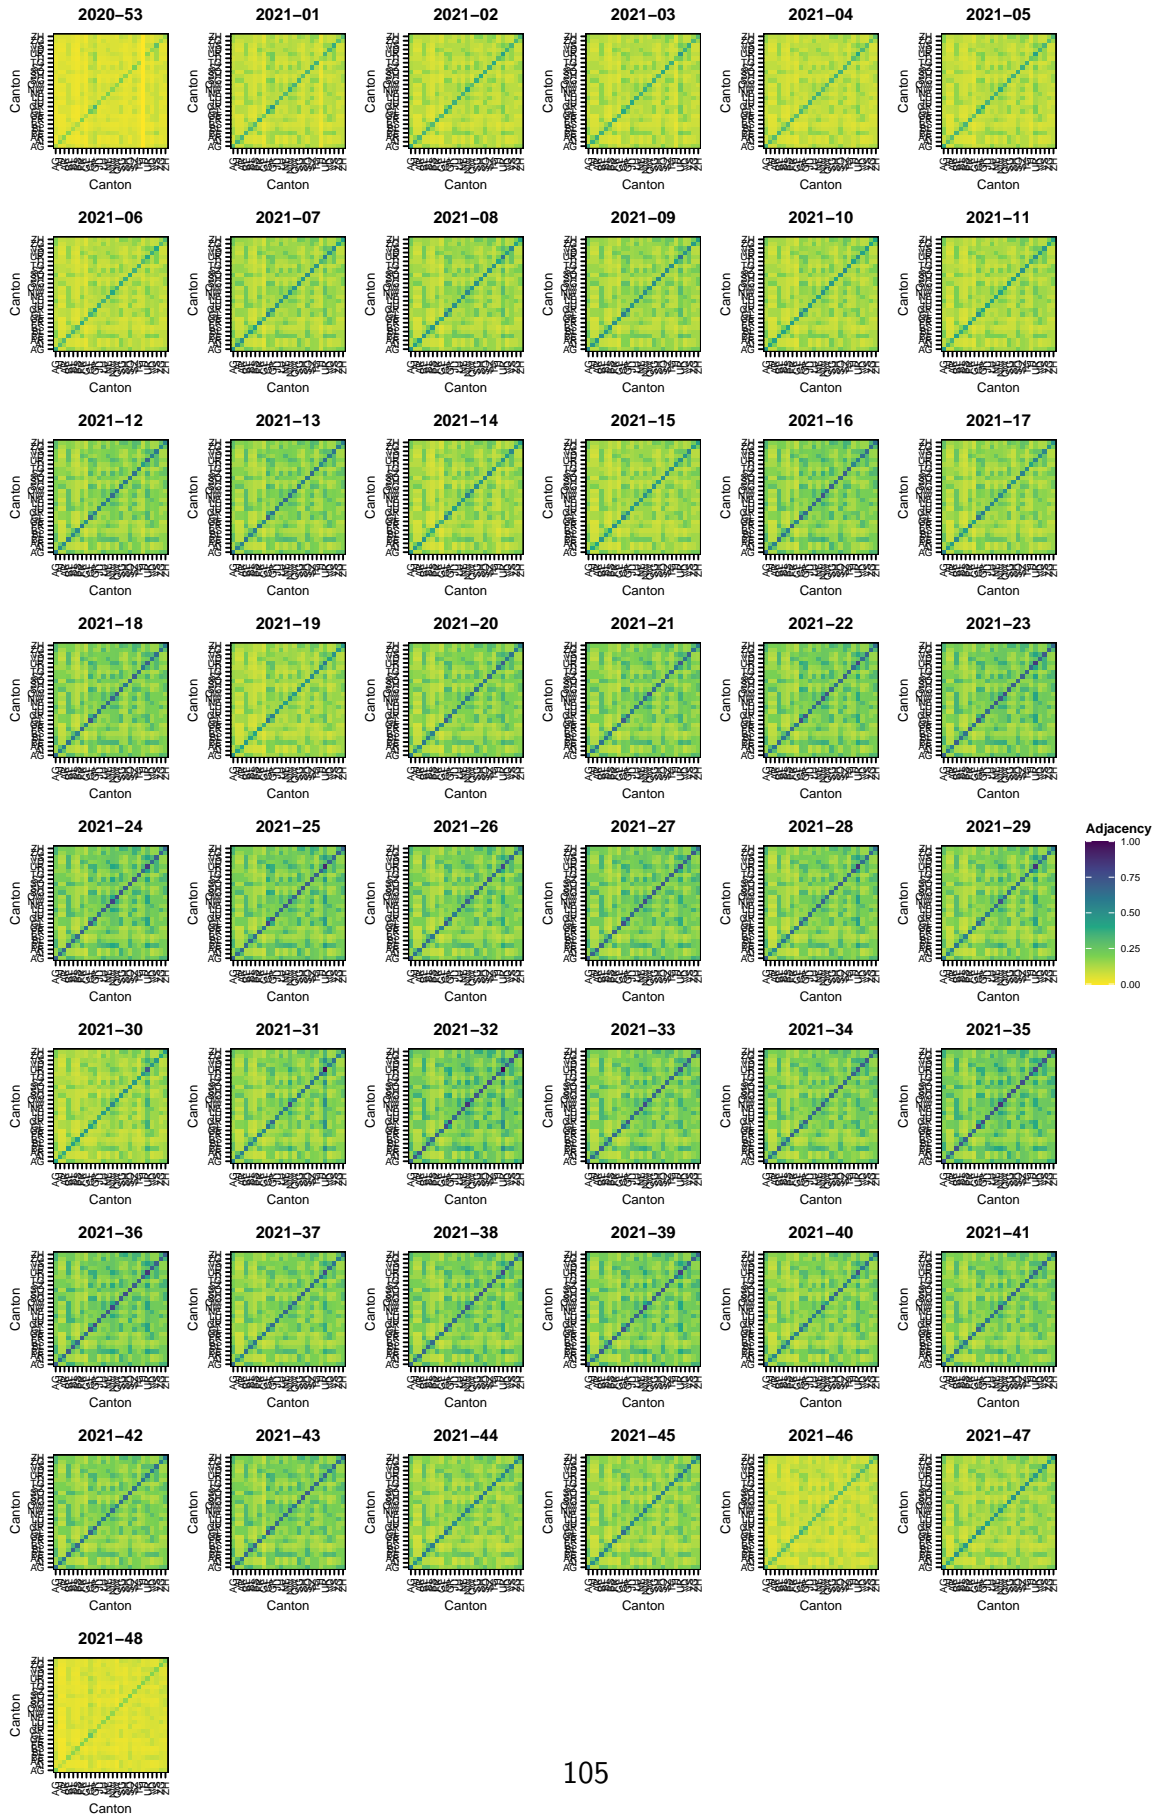

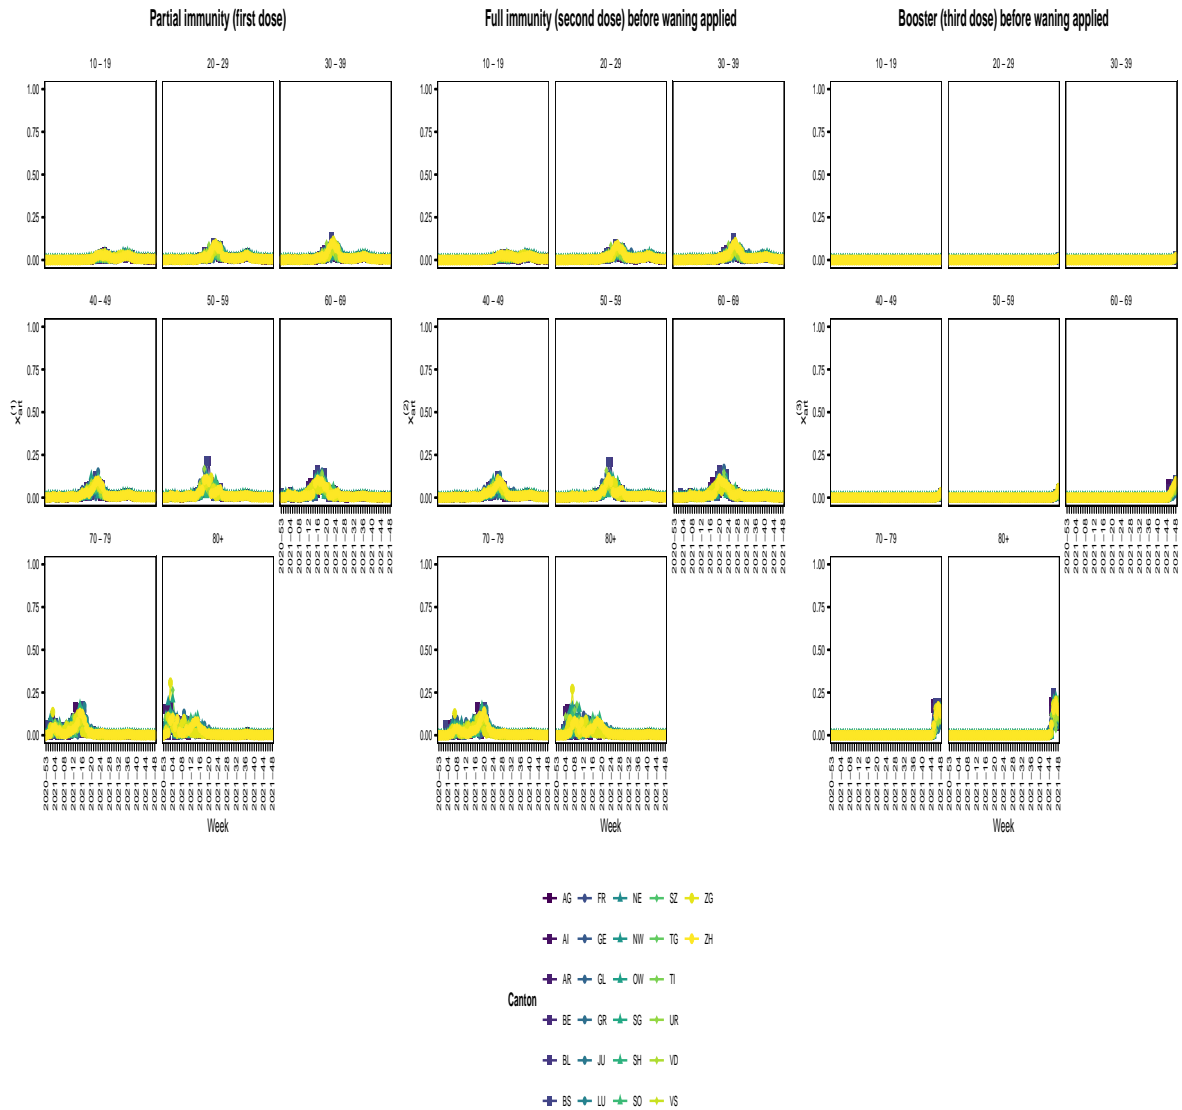

124

125 We correct the vaccination coverage for waning as described in Bekker-Nielsen Dun-  
 126 bar and Held [1]. The waning function is multiplied to each time point. This is achieved  
 127 using a triangle matrix. For each age and canton combination at each day we sum up the  
 128 entries for that day as well as the waned entries for previous days. We then divide by the  
 129 population.

130 **6 Cases**

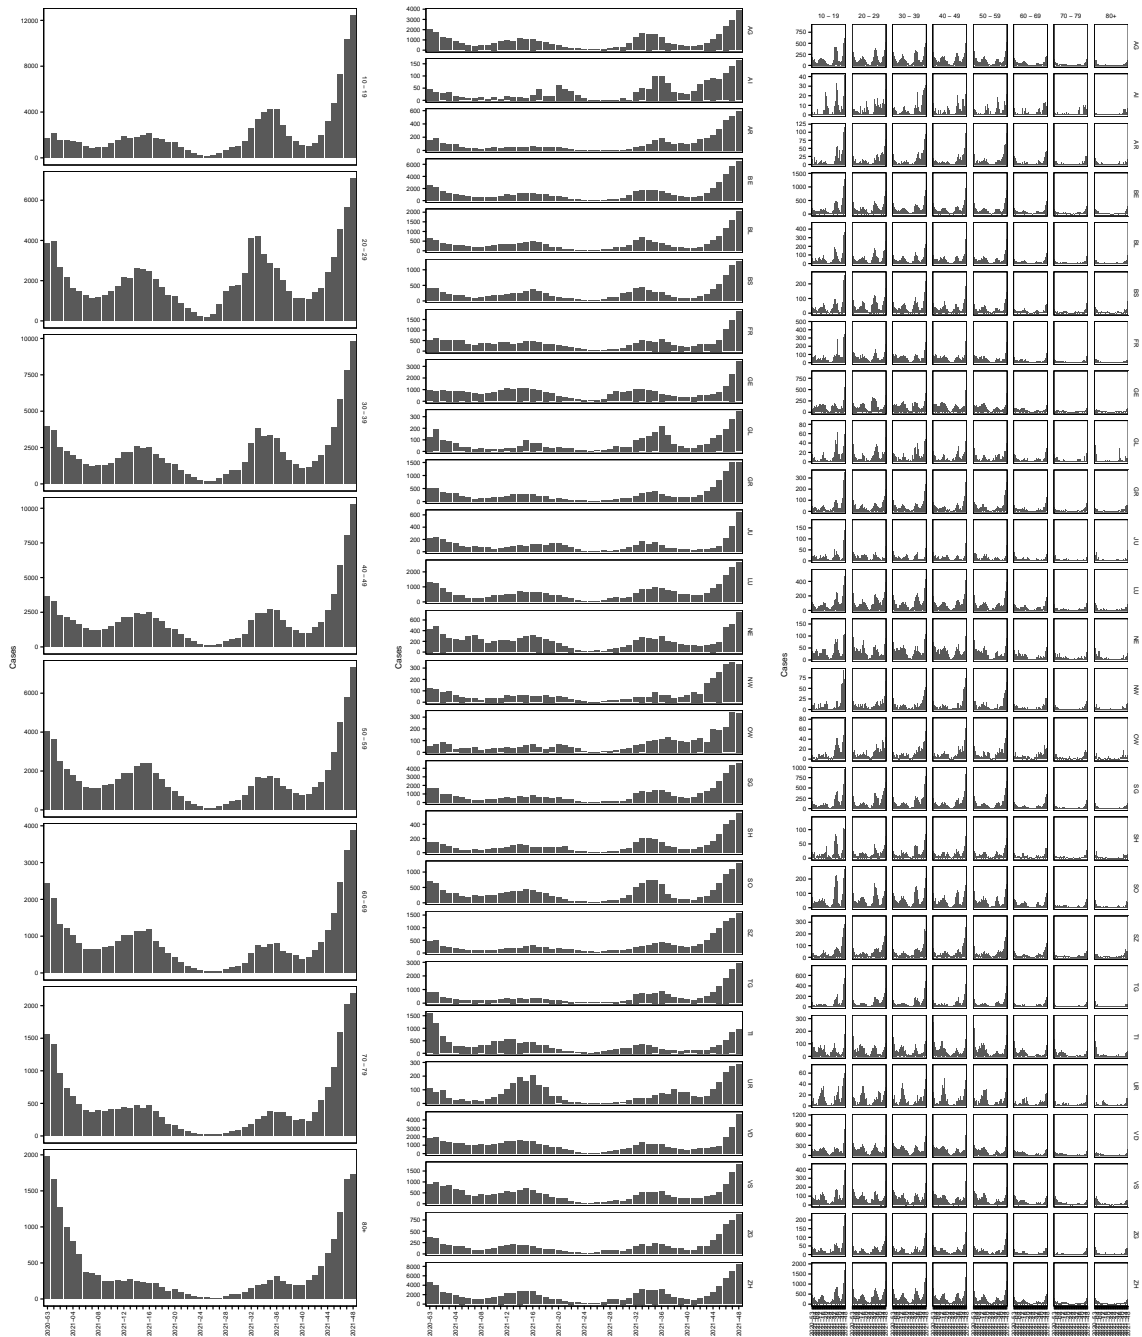

131

132 **7 Measles literature**

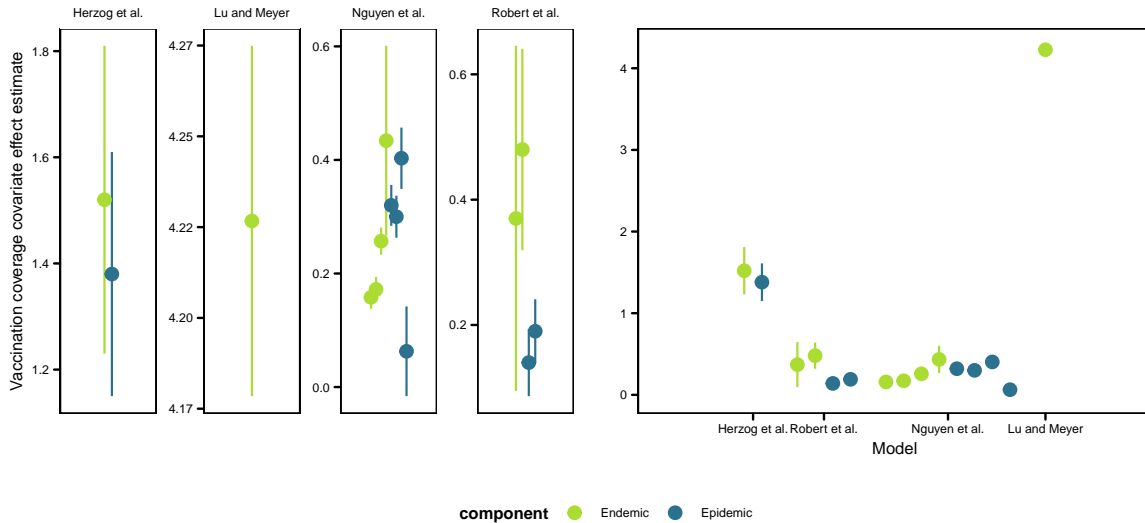

133

## 134 8 Predicted cases

135 Distribution of predicted cases for the model with vaccination coverage in the en-  
 136 demic component under the original and alternative vaccination coverage option for regions  
 137 (above) and age groups (below)

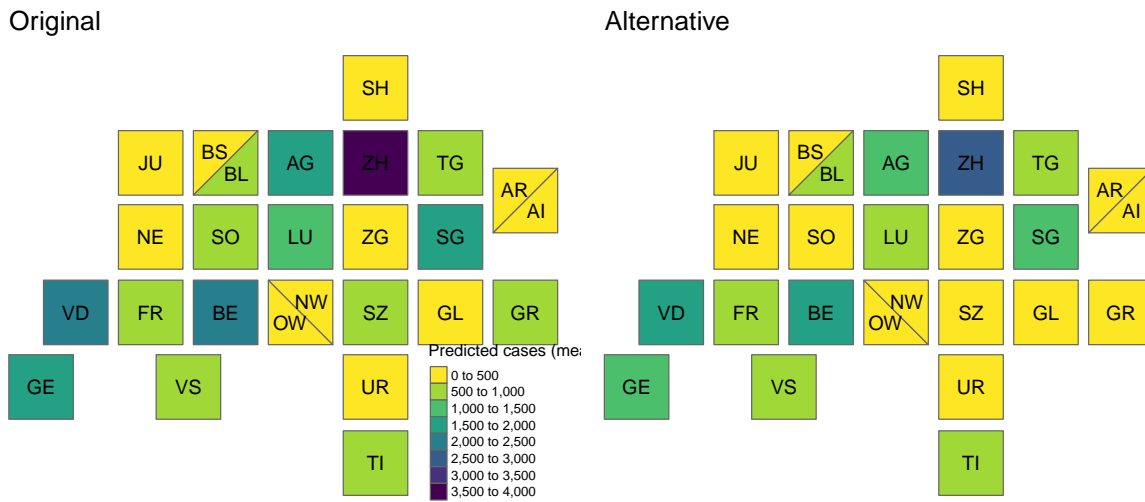

138

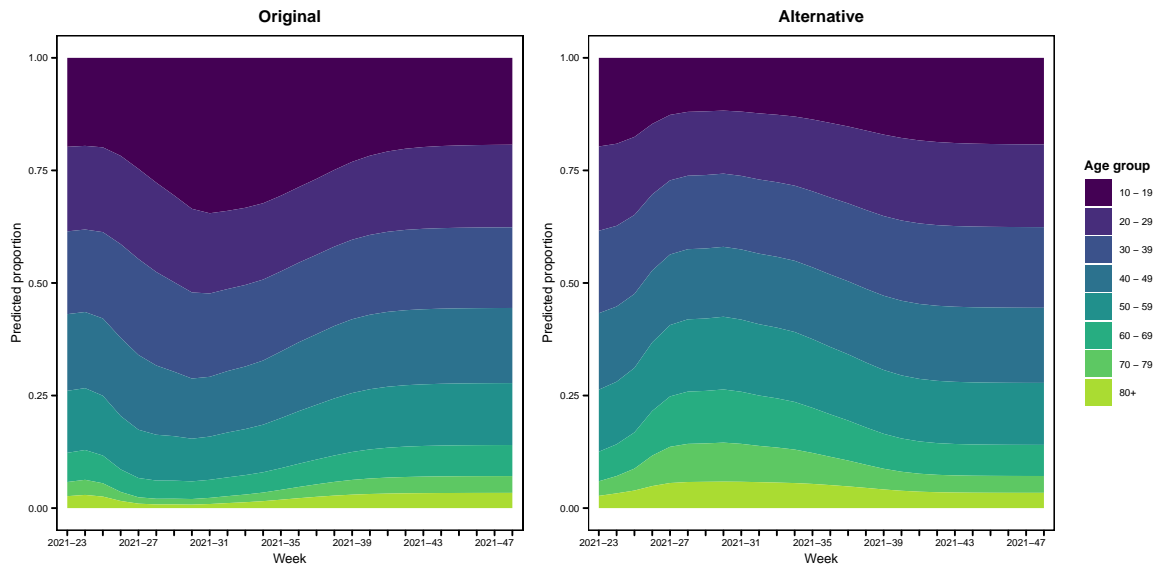

139

140 **8.1 Summed across prediction window**

141 Final size estimates based on path forecasts (regional model)

|    | Original coverage |         |          |       | Alternative coverage |          |       |
|----|-------------------|---------|----------|-------|----------------------|----------|-------|
|    | True              | Endemic | Epidemic | Both  | Endemic              | Epidemic | Both  |
| AG | 24208             | 42919   | 23073    | 22502 | 31254                | 8402     | 6924  |
| AI | 1288              | 1925    | 1339     | 1292  | 1385                 | 192      | 154   |
| AR | 3687              | 4795    | 3086     | 2988  | 3481                 | 537      | 432   |
| BE | 37976             | 58133   | 28781    | 28026 | 42970                | 11296    | 9738  |
| BL | 10983             | 16992   | 9262     | 8999  | 12751                | 3810     | 3410  |
| BS | 7531              | 11523   | 5482     | 5341  | 8757                 | 3007     | 2724  |
| FR | 10182             | 21343   | 9765     | 9495  | 15612                | 3234     | 2659  |
| GE | 19107             | 41614   | 21638    | 21308 | 30515                | 9968     | 8516  |
| GL | 2413              | 3541    | 2433     | 2423  | 2407                 | 790      | 589   |
| GR | 9279              | 13867   | 7458     | 7290  | 10029                | 2480     | 2012  |
| JU | 2586              | 5798    | 3493     | 3410  | 4168                 | 879      | 695   |
| LU | 18050             | 30844   | 16897    | 16602 | 22215                | 5761     | 4676  |
| NE | 4708              | 11888   | 5779     | 5611  | 8727                 | 2022     | 1693  |
| NW | 2377              | 3684    | 2027     | 1969  | 2681                 | 469      | 381   |
| OW | 2571              | 4049    | 2491     | 2430  | 2898                 | 486      | 376   |
| SG | 30828             | 43552   | 27724    | 27038 | 31215                | 7094     | 5608  |
| SH | 3411              | 5272    | 2966     | 2884  | 3897                 | 1087     | 938   |
| SO | 9357              | 16315   | 8919     | 8702  | 11941                | 3390     | 2856  |
| SZ | 10431             | 15106   | 10235    | 10068 | 10690                | 2467     | 1902  |
| TG | 16314             | 20355   | 13565    | 13226 | 14548                | 3399     | 2709  |
| TI | 6105              | 16835   | 8746     | 8485  | 12644                | 3754     | 3341  |
| UR | 1860              | 3762    | 2497     | 2410  | 2747                 | 404      | 333   |
| VD | 23841             | 56845   | 25277    | 24551 | 42101                | 10648    | 9175  |
| VS | 10502             | 24863   | 13690    | 13375 | 18077                | 4157     | 3441  |
| ZG | 5337              | 9020    | 4908     | 4759  | 6702                 | 2055     | 1775  |
| ZH | 55763             | 97121   | 44679    | 42971 | 73768                | 23259    | 20912 |

142

143

Final size estimates based on path forecasts (age group model)

|         | True  | Original coverage |          |        | Alternative coverage |          |       |
|---------|-------|-------------------|----------|--------|----------------------|----------|-------|
|         |       | Endemic           | Epidemic | Both   | Endemic              | Epidemic | Both  |
| 10 - 19 | 73195 | 115341            | 497769   | 151064 | 54394                | 54878    | 44820 |
| 20 - 29 | 59099 | 94228             | 282376   | 105667 | 54644                | 74290    | 49647 |
| 30 - 39 | 62337 | 93760             | 265990   | 106912 | 54640                | 63686    | 49436 |
| 40 - 49 | 55949 | 84499             | 226076   | 95705  | 51097                | 57481    | 46829 |
| 50 - 59 | 40373 | 68097             | 171177   | 75906  | 44217                | 49229    | 41602 |
| 60 - 69 | 20807 | 33111             | 78320    | 36738  | 24494                | 26597    | 24109 |
| 70 - 79 | 11779 | 17250             | 49350    | 20853  | 14677                | 15245    | 15032 |
| 80+     | 9342  | 15400             | 59054    | 21075  | 12319                | 13778    | 12827 |

144

145 **References**

146 [1] M. Bekker-Nielsen Dunbar and L. Held. STUDY PROTOCOL: The COVID-19 vaccina-  
 147 tion campaign in Switzerland and its impact on disease spread. *Open Science Founda-*  
 148 *tion*, 2022. DOI:[10.17605/OSF.IO/6X4VK](https://doi.org/10.17605/OSF.IO/6X4VK).
